# Supplementary material for: Identification and Characterization of Proteins That Are Involved in RTP1S-Dependent Transport of Olfactory Receptors
Source: Int J Mol Sci. 2023 Apr 25;24(9):7829. doi: 10.3390/ijms24097829 (PMC10177996; doi:10.3390/ijms24097829)
Supplement: Supplementary file 1 [file ijms-24-07829-s001.zip › Supplementary Dataset S1.xlsx]

## Sheet: s1_no_expression
Protein FDR Confidence Combined	Master	Accession	Description	Exp q-value Combined	Contaminant	Sum PEP Score	Coverage in Percent	Number of Peptides	Number of PSMs	Number of Unique Peptides	Number of AAs	MW in kDa	calc pI	Score Sequest HT	Number of Peptides by Sequest HT	Number of Razor Peptides	Abundances Normalized Meas. 1	Abundances Normalized Meas. 2	Abundances Normalized Meas. 3
High	IsMasterProtein	P11498	Pyruvate carboxylase, mitochondrial OS=Homo sapiens OX=9606 GN=PC PE=1 SV=2	0	FALSE	477.799	61	54	386	54	1178	129.6	6.84	1229.4	54	0	2.16174e+09	2.25524e+09	2.24758e+09
High	IsMasterProtein	P05165	Propionyl-CoA carboxylase alpha chain, mitochondrial OS=Homo sapiens OX=9606 GN=PCCA PE=1 SV=4	0	FALSE	291.755	60	37	215	37	728	80	7.52	702.7	37	0	8.84469e+08	8.93383e+08	9.60398e+08
High	IsMasterProtein	Q96RQ3	Methylcrotonoyl-CoA carboxylase subunit alpha, mitochondrial OS=Homo sapiens OX=9606 GN=MCCC1 PE=1 SV=3	0	FALSE	199.07	48	26	156	26	725	80.4	7.78	509.67	26	0	6.24044e+08	6.46506e+08	6.67729e+08
High	IsMasterProtein	P68363	Tubulin alpha-1B chain OS=Homo sapiens OX=9606 GN=TUBA1B PE=1 SV=1	0	FALSE	116.215	52	17	73	17	451	50.1	5.06	241.45	17	0	2.46856e+08	2.68542e+08	2.85043e+08
High	IsMasterProtein	P84103	Serine/arginine-rich splicing factor 3 OS=Homo sapiens OX=9606 GN=SRSF3 PE=1 SV=1	0	FALSE	110.373	53	11	117	10	164	19.3	11.65	356.37	11	1	6.50993e+08	6.32e+08	6.84105e+08
High	IsMasterProtein	Q9Y383	Putative RNA-binding protein Luc7-like 2 OS=Homo sapiens OX=9606 GN=LUC7L2 PE=1 SV=2	0	FALSE	101.257	42	16	80	10	392	46.5	10.01	261.84	16	7	346749278	3.36687e+08	3.57304e+08
High	IsMasterProtein	P07900	Heat shock protein HSP 90-alpha OS=Homo sapiens OX=9606 GN=HSP90AA1 PE=1 SV=5	0	FALSE	93.954	26	18	70	12	732	84.6	5.02	189.93	18	0	5.68896e+07	6.1044e+07	7.85351e+07
High	IsMasterProtein	P06733	Alpha-enolase OS=Homo sapiens OX=9606 GN=ENO1 PE=1 SV=2	0	FALSE	86.927	42	14	42	14	434	47.1	7.39	134.84	14	0	1.34203e+08	1.11509e+08	1.25529e+08
High	IsMasterProtein	P0DMV9	Heat shock 70 kDa protein 1B OS=Homo sapiens OX=9606 GN=HSPA1B PE=1 SV=1	0	FALSE	86.924	34	15	55	13	641	70	5.66	176.29	15	2	1.39935e+08	1.53899e+08	1.53441e+08
High	IsMasterProtein	Q14498	RNA-binding protein 39 OS=Homo sapiens OX=9606 GN=RBM39 PE=1 SV=2	0	FALSE	85.949	33	14	54	14	530	59.3	10.1	173.94	14	0	1.9353e+08	2.09603e+08	2.15174e+08
High	IsMasterProtein	P11142	Heat shock cognate 71 kDa protein OS=Homo sapiens OX=9606 GN=HSPA8 PE=1 SV=1	0	FALSE	77.374	27	13	44	10	646	70.9	5.52	135.65	13	1	6.01167e+07	5.82413e+07	5.96343e+07
High	IsMasterProtein	P08238	Heat shock protein HSP 90-beta OS=Homo sapiens OX=9606 GN=HSP90AB1 PE=1 SV=4	0	FALSE	76.885	26	19	60	13	724	83.2	5.03	159.93	19	7	1.90513e+08	2.01734e+08	2.51218e+08
High	IsMasterProtein	Q13085	Acetyl-CoA carboxylase 1 OS=Homo sapiens OX=9606 GN=ACACA PE=1 SV=2	0	FALSE	70.038	8	14	39	14	2346	265.4	6.37	115.77	14	0	6.44979e+07	7.65997e+07	7.37558e+07
High	IsMasterProtein	Q9NQ29	Putative RNA-binding protein Luc7-like 1 OS=Homo sapiens OX=9606 GN=LUC7L PE=1 SV=1	0	FALSE	69.109	29	10	49	4	371	43.7	9.92	153.65	10	0	4.85148e+07	5.31711e+07	5.663e+07
High	IsMasterProtein	P14618	Pyruvate kinase PKM OS=Homo sapiens OX=9606 GN=PKM PE=1 SV=4	0	FALSE	68.293	31	11	26	11	531	57.9	7.84	88.44	11	0	5.41812e+07	5.73174e+07	5.96997e+07
High	IsMasterProtein	P13639	Elongation factor 2 OS=Homo sapiens OX=9606 GN=EEF2 PE=1 SV=4	0	FALSE	65.77	27	18	49	18	858	95.3	6.83	124.13	18	0	9.45737e+07	9.22334e+07	1.0077e+08
High	IsMasterProtein	P68104	Elongation factor 1-alpha 1 OS=Homo sapiens OX=9606 GN=EEF1A1 PE=1 SV=1	0	FALSE	64.781	29	10	44	10	462	50.1	9.01	144.4	10	0	1.97237e+08	2.01801e+08	2.03407e+08
High	IsMasterProtein	P04075	Fructose-bisphosphate aldolase A OS=Homo sapiens OX=9606 GN=ALDOA PE=1 SV=2	0	FALSE	63.774	32	9	27	9	364	39.4	8.09	92.17	9	0	7.94004e+07	8.44847e+07	1.05113e+08
High	IsMasterProtein	Q00839	Heterogeneous nuclear ribonucleoprotein U OS=Homo sapiens OX=9606 GN=HNRNPU PE=1 SV=6	0	FALSE	56.668	15	12	40	12	825	90.5	6	100.85	12	0	8.98806e+07	9.14669e+07	6.52004e+07
High	IsMasterProtein	P62241	40S ribosomal protein S8 OS=Homo sapiens OX=9606 GN=RPS8 PE=1 SV=2	0	FALSE	54.867	54	11	35	11	208	24.2	10.32	98.66	11	0	68203896	6.74394e+07	7.71911e+07
High	IsMasterProtein	P07195	L-lactate dehydrogenase B chain OS=Homo sapiens OX=9606 GN=LDHB PE=1 SV=2	0	FALSE	51.392	31	11	36	10	334	36.6	6.05	99.34	11	1	8.58809e+07	9.7667e+07	9.79688e+07
High	IsMasterProtein	P63244	Receptor of activated protein C kinase 1 OS=Homo sapiens OX=9606 GN=RACK1 PE=1 SV=3	0	FALSE	50.261	47	10	30	10	317	35.1	7.69	86.15	10	0	7.83957e+07	8.48026e+07	9.02863e+07
High	IsMasterProtein	P22626	Heterogeneous nuclear ribonucleoproteins A2/B1 OS=Homo sapiens OX=9606 GN=HNRNPA2B1 PE=1 SV=2	0	FALSE	50.023	26	11	36	10	353	37.4	8.95	85.17	11	1	4.5917e+07	4.54499e+07	4.67634e+07
High	IsMasterProtein	P09651	Heterogeneous nuclear ribonucleoprotein A1 OS=Homo sapiens OX=9606 GN=HNRNPA1 PE=1 SV=5	0	FALSE	48.884	25	8	34	7	372	38.7	9.13	89.78	8	0	3.20874e+07	3.22905e+07	3.06119e+07
High	IsMasterProtein	P09429	High mobility group protein B1 OS=Homo sapiens OX=9606 GN=HMGB1 PE=1 SV=3	0	FALSE	48.874	30	7	36	7	215	24.9	5.74	111.56	7	0	1.05981e+08	9.88395e+07	1.05469e+08
High	IsMasterProtein	P53999	Activated RNA polymerase II transcriptional coactivator p15 OS=Homo sapiens OX=9606 GN=SUB1 PE=1 SV=3	0	FALSE	47.775	40	8	45	8	127	14.4	9.6	127.84	8	0	2.84721e+08	2.88267e+08	3.05171e+08
High	IsMasterProtein	P26368	Splicing factor U2AF 65 kDa subunit OS=Homo sapiens OX=9606 GN=U2AF2 PE=1 SV=4	0	FALSE	46.598	22	8	28	8	475	53.5	9.09	87.51	8	0	71689922	7.652e+07	7.6247e+07
High	IsMasterProtein	P62258	14-3-3 protein epsilon OS=Homo sapiens OX=9606 GN=YWHAE PE=1 SV=1	0	FALSE	46.447	38	9	31	8	255	29.2	4.74	88.76	9	1	74720081	8.04991e+07	7.9551e+07
High	IsMasterProtein	P04406	Glyceraldehyde-3-phosphate dehydrogenase OS=Homo sapiens OX=9606 GN=GAPDH PE=1 SV=3	0	FALSE	43.524	35	8	30	8	335	36	8.46	93.55	8	0	68824695	7.27891e+07	7.1001e+07
High	IsMasterProtein	P07437	Tubulin beta chain OS=Homo sapiens OX=9606 GN=TUBB PE=1 SV=2	0	FALSE	43.459	32	10	41	10	444	49.6	4.89	100.52	10	0	159928342	1.80269e+08	1.82156e+08
High	IsMasterProtein	P10809	60 kDa heat shock protein, mitochondrial OS=Homo sapiens OX=9606 GN=HSPD1 PE=1 SV=2	0	FALSE	41.115	25	10	18	10	573	61	5.87	53.21	10	0	3.57311e+07	3.62945e+07	3.37509e+07
High	IsMasterProtein	O43175	D-3-phosphoglycerate dehydrogenase OS=Homo sapiens OX=9606 GN=PHGDH PE=1 SV=4	0	FALSE	41.003	29	12	28	12	533	56.6	6.71	61.16	12	0	4.98857e+07	4.93683e+07	5.49903e+07
High	IsMasterProtein	P05388	60S acidic ribosomal protein P0 OS=Homo sapiens OX=9606 GN=RPLP0 PE=1 SV=1	0	FALSE	40.444	34	7	22	7	317	34.3	5.97	78.44	7	0	37141571	4.16425e+07	4.11398e+07
High	IsMasterProtein	P11021	Endoplasmic reticulum chaperone BiP OS=Homo sapiens OX=9606 GN=HSPA5 PE=1 SV=2	0	FALSE	39.844	17	8	22	6	654	72.3	5.16	69.34	8	0	1.28695e+07	1.42791e+07	1.55391e+07
High	IsMasterProtein	P61313	60S ribosomal protein L15 OS=Homo sapiens OX=9606 GN=RPL15 PE=1 SV=2	0	FALSE	38.775	44	9	34	9	204	24.1	11.62	86.66	9	0	4.70269e+07	4.98527e+07	5.03717e+07
High	IsMasterProtein	P12277	Creatine kinase B-type OS=Homo sapiens OX=9606 GN=CKB PE=1 SV=1	0	FALSE	38.496	27	7	18	7	381	42.6	5.59	63.47	7	0	3.57668e+07	3.76257e+07	3.99125e+07
High	IsMasterProtein	P62987	Ubiquitin-60S ribosomal protein L40 OS=Homo sapiens OX=9606 GN=UBA52 PE=1 SV=2	0	FALSE	36.11	40	6	32	2	128	14.7	9.83	68.16	6	4	5.66649e+07	6.28637e+07	6.33991e+07
High	IsMasterProtein	P00338	L-lactate dehydrogenase A chain OS=Homo sapiens OX=9606 GN=LDHA PE=1 SV=2	0	FALSE	36.109	29	9	26	8	332	36.7	8.27	58.93	9	0	88940044	1.00391e+08	1.01982e+08
High	IsMasterProtein	Q08211	ATP-dependent RNA helicase A OS=Homo sapiens OX=9606 GN=DHX9 PE=1 SV=4	0	FALSE	36.07	10	12	31	12	1270	140.9	6.84	62.26	12	0	2.66607e+07	2.72069e+07	2.81455e+07
High	IsMasterProtein	P23396	40S ribosomal protein S3 OS=Homo sapiens OX=9606 GN=RPS3 PE=1 SV=2	0	FALSE	35.609	43	9	24	9	243	26.7	9.66	63.26	9	0	3.08952e+07	3.37319e+07	3.51745e+07
High	IsMasterProtein	P15531	Nucleoside diphosphate kinase A OS=Homo sapiens OX=9606 GN=NME1 PE=1 SV=1	0	FALSE	32.93	53	7	18	1	152	17.1	6.19	50.82	7	0	1.25066e+07	1.49872e+07	1.35353e+07
High	IsMasterProtein	P60174-1	Isoform 2 of Triosephosphate isomerase OS=Homo sapiens OX=9606 GN=TPI1	0	FALSE	32.268	38	7	19	7	249	26.7	6.9	61.26	7	0	2.31114e+07	2.61241e+07	2.58835e+07
High	IsMasterProtein	P25705	ATP synthase subunit alpha, mitochondrial OS=Homo sapiens OX=9606 GN=ATP5F1A PE=1 SV=1	0	FALSE	31.355	19	7	15	7	553	59.7	9.13	49.01	7	0	1.83911e+07	1.91748e+07	1.9745e+07
High	IsMasterProtein	P27635	60S ribosomal protein L10 OS=Homo sapiens OX=9606 GN=RPL10 PE=1 SV=4	0	FALSE	31.315	36	8	26	8	214	24.6	10.08	54.63	8	0	7.011e+07	7.8814e+07	7.82033e+07
High	IsMasterProtein	O95232	Luc7-like protein 3 OS=Homo sapiens OX=9606 GN=LUC7L3 PE=1 SV=2	0	FALSE	31.14	13	7	17	7	432	51.4	9.79	50.9	7	0	1.97369e+07	2.05354e+07	2.35592e+07
High	IsMasterProtein	P07737	Profilin-1 OS=Homo sapiens OX=9606 GN=PFN1 PE=1 SV=2	0	FALSE	31.126	44	6	31	6	140	15	8.27	69.37	6	0	8.41763e+07	9.49105e+07	8.83659e+07
High	IsMasterProtein	Q9Y277	Voltage-dependent anion-selective channel protein 3 OS=Homo sapiens OX=9606 GN=VDAC3 PE=1 SV=1	0	FALSE	30.479	27	5	13	5	283	30.6	8.66	44.52	5	0	1.66184e+07	1.7111e+07	1.79625e+07
High	IsMasterProtein	P36578	60S ribosomal protein L4 OS=Homo sapiens OX=9606 GN=RPL4 PE=1 SV=5	0	FALSE	30.227	23	8	21	8	427	47.7	11.06	60.31	8	0	3.86769e+07	4.12713e+07	4.57802e+07
High	IsMasterProtein	P62826	GTP-binding nuclear protein Ran OS=Homo sapiens OX=9606 GN=RAN PE=1 SV=3	0	FALSE	30.146	29	6	20	6	216	24.4	7.49	64.94	6	0	5.44455e+07	4.60174e+07	6.00912e+07
High	IsMasterProtein	P31943	Heterogeneous nuclear ribonucleoprotein H OS=Homo sapiens OX=9606 GN=HNRNPH1 PE=1 SV=4	0	FALSE	30.094	16	5	15	5	449	49.2	6.3	47.28	5	0	1.3489e+07	1.40806e+07	1.59775e+07
High	IsMasterProtein	P62701	40S ribosomal protein S4, X isoform OS=Homo sapiens OX=9606 GN=RPS4X PE=1 SV=2	0	FALSE	29.734	32	9	23	9	263	29.6	10.15	67.65	9	0	3.72411e+07	3.74668e+07	3.79037e+07
High	IsMasterProtein	P61978	Heterogeneous nuclear ribonucleoprotein K OS=Homo sapiens OX=9606 GN=HNRNPK PE=1 SV=1	0	FALSE	29.493	22	8	15	8	463	50.9	5.54	31.84	8	0	1.7298e+07	1.94913e+07	1.82119e+07
High	IsMasterProtein	O15042	U2 snRNP-associated SURP motif-containing protein OS=Homo sapiens OX=9606 GN=U2SURP PE=1 SV=2	0	FALSE	28.367	9	7	18	7	1029	118.2	8.47	54.65	7	0	1.96029e+07	1.8614e+07	1.91141e+07
High	IsMasterProtein	P63104	14-3-3 protein zeta/delta OS=Homo sapiens OX=9606 GN=YWHAZ PE=1 SV=1	0	FALSE	27.615	35	8	23	5	245	27.7	4.79	60.02	8	2	1.94144e+07	1.76223e+07	2.10049e+07
High	IsMasterProtein	P22314	Ubiquitin-like modifier-activating enzyme 1 OS=Homo sapiens OX=9606 GN=UBA1 PE=1 SV=3	0	FALSE	27.614	10	7	15	7	1058	117.8	5.76	41.1	7	0	1.15202e+07	1.03186e+07	1.1617e+07
High	IsMasterProtein	P15880	40S ribosomal protein S2 OS=Homo sapiens OX=9606 GN=RPS2 PE=1 SV=2	0	FALSE	27.569	29	7	19	7	293	31.3	10.24	51.97	7	0	2.27402e+07	2.24145e+07	2.47159e+07
High	IsMasterProtein	Q01081	Splicing factor U2AF 35 kDa subunit OS=Homo sapiens OX=9606 GN=U2AF1 PE=1 SV=3	0	FALSE	27.482	25	5	22	5	240	27.9	8.81	72.11	5	0	7.10507e+07	6.65647e+07	7.19801e+07
High	IsMasterProtein	P49368	T-complex protein 1 subunit gamma OS=Homo sapiens OX=9606 GN=CCT3 PE=1 SV=4	0	FALSE	27.481	18	7	17	7	545	60.5	6.49	39.5	7	0	2.25074e+07	2.42387e+07	2.36703e+07
High	IsMasterProtein	Q05519	Serine/arginine-rich splicing factor 11 OS=Homo sapiens OX=9606 GN=SRSF11 PE=1 SV=1	0	FALSE	27.068	12	4	10	4	484	53.5	10.52	30.91	4	0	1.64791e+07	1.71761e+07	2.00649e+07
High	IsMasterProtein	P22234	Multifunctional protein ADE2 OS=Homo sapiens OX=9606 GN=PAICS PE=1 SV=3	0	FALSE	26.483	24	9	24	9	425	47	7.23	51.44	9	0	2.47054e+07	2.61807e+07	2.59374e+07
High	IsMasterProtein	Q9P258	Protein RCC2 OS=Homo sapiens OX=9606 GN=RCC2 PE=1 SV=2	0	FALSE	26.226	17	6	13	6	522	56	8.78	42.54	6	0	14207125	1.29293e+07	1.54095e+07
High	IsMasterProtein	Q16777	Histone H2A type 2-C OS=Homo sapiens OX=9606 GN=HIST2H2AC PE=1 SV=4	0	FALSE	26.055	33	4	23	1	129	14	10.9	72.74	4	3	156510802	1.80153e+08	1.95038e+08
High	IsMasterProtein	P18669	Phosphoglycerate mutase 1 OS=Homo sapiens OX=9606 GN=PGAM1 PE=1 SV=2	0	FALSE	25.554	28	5	12	5	254	28.8	7.18	37.96	5	0	16219284	1.69754e+07	1.75111e+07
High	IsMasterProtein	P46777	60S ribosomal protein L5 OS=Homo sapiens OX=9606 GN=RPL5 PE=1 SV=3	0	FALSE	24.962	23	6	14	6	297	34.3	9.72	39.64	6	0	2.67639e+07	2.8675e+07	2.69342e+07
High	IsMasterProtein	P22392-2	Isoform 3 of Nucleoside diphosphate kinase B OS=Homo sapiens OX=9606 GN=NME2	0	FALSE	24.94	49	8	20	2	267	30.1	8.92	50.13	8	6	65352067	6.42164e+07	6.07841e+07
High	IsMasterProtein	Q5QNW6	Histone H2B type 2-F OS=Homo sapiens OX=9606 GN=HIST2H2BF PE=1 SV=3	0	FALSE	24.767	40	5	40	1	126	13.9	10.32	77.36	5	0	23236320	2.74266e+07	2.79684e+07
High	IsMasterProtein	Q02878	60S ribosomal protein L6 OS=Homo sapiens OX=9606 GN=RPL6 PE=1 SV=3	0	FALSE	24.702	19	5	15	5	288	32.7	10.58	40.69	5	0	2.0006e+07	2.01299e+07	2.18388e+07
High	IsMasterProtein	P45880	Voltage-dependent anion-selective channel protein 2 OS=Homo sapiens OX=9606 GN=VDAC2 PE=1 SV=2	0	FALSE	24.654	32	7	20	7	294	31.5	7.56	61.75	7	0	38692484	4.25563e+07	3.90176e+07
High	IsMasterProtein	Q07955	Serine/arginine-rich splicing factor 1 OS=Homo sapiens OX=9606 GN=SRSF1 PE=1 SV=2	0	FALSE	24.358	36	7	23	7	248	27.7	10.36	53.5	7	0	4.09408e+07	4.16561e+07	4.72447e+07
High	IsMasterProtein	Q16778	Histone H2B type 2-E OS=Homo sapiens OX=9606 GN=HIST2H2BE PE=1 SV=3	0	FALSE	24.24	40	5	38	1	126	13.9	10.32	73.91	5	5	3.92911e+08	4.2742e+08	4.45289e+08
High	IsMasterProtein	Q16629	Serine/arginine-rich splicing factor 7 OS=Homo sapiens OX=9606 GN=SRSF7 PE=1 SV=1	0	FALSE	24.131	27	6	19	5	238	27.4	11.82	50.7	6	0	1.86549e+07	2.12193e+07	2.214e+07
High	IsMasterProtein	P39023	60S ribosomal protein L3 OS=Homo sapiens OX=9606 GN=RPL3 PE=1 SV=2	0	FALSE	22.746	13	5	16	5	403	46.1	10.18	36.78	5	0	26833569	2.65703e+07	2.89719e+07
High	IsMasterProtein	P06748	Nucleophosmin OS=Homo sapiens OX=9606 GN=NPM1 PE=1 SV=2	0	FALSE	22.502	16	3	8	3	294	32.6	4.78	25.87	3	0	3.96897e+07	3.85521e+07	4.59776e+07
High	IsMasterProtein	P49327	Fatty acid synthase OS=Homo sapiens OX=9606 GN=FASN PE=1 SV=3	0	FALSE	22.466	4	6	11	6	2511	273.3	6.44	31.31	6	0	7.3636e+06	8.17316e+06	8.92695e+06
High	IsMasterProtein	P25398	40S ribosomal protein S12 OS=Homo sapiens OX=9606 GN=RPS12 PE=1 SV=3	0	FALSE	21.96	32	4	13	4	132	14.5	7.21	40.39	4	0	2.19046e+07	2.18954e+07	2.48503e+07
High	IsMasterProtein	P23528	Cofilin-1 OS=Homo sapiens OX=9606 GN=CFL1 PE=1 SV=3	0	FALSE	21.777	37	5	12	5	166	18.5	8.09	33.04	5	0	2.70701e+07	3.07024e+07	2.86211e+07
High	IsMasterProtein	Q00610	Clathrin heavy chain 1 OS=Homo sapiens OX=9606 GN=CLTC PE=1 SV=5	0	FALSE	21.599	5	6	10	6	1675	191.5	5.69	31.55	6	0	8.80945e+06	9.5975e+06	9.67915e+06
High	IsMasterProtein	P61247	40S ribosomal protein S3a OS=Homo sapiens OX=9606 GN=RPS3A PE=1 SV=2	0	FALSE	21.509	21	6	15	6	264	29.9	9.73	32.8	6	0	1.5846e+07	1.63482e+07	1.84976e+07
High	IsMasterProtein	Q9UQ35	Serine/arginine repetitive matrix protein 2 OS=Homo sapiens OX=9606 GN=SRRM2 PE=1 SV=2	0	FALSE	21.295	3	5	13	5	2752	299.4	12.06	46.77	5	0	2.5496e+07	2.65536e+07	2.74314e+07
High	IsMasterProtein	P63241	Eukaryotic translation initiation factor 5A-1 OS=Homo sapiens OX=9606 GN=EIF5A PE=1 SV=2	0	FALSE	20.865	41	5	11	5	154	16.8	5.24	34.92	5	0	2.68872e+07	2.90353e+07	2.85606e+07
High	IsMasterProtein	Q8TA86	Retinitis pigmentosa 9 protein OS=Homo sapiens OX=9606 GN=RP9 PE=1 SV=2	0	FALSE	20.781	17	4	10	4	221	26.1	9.79	34.52	4	0	9.08417e+06	1.16837e+07	1.49679e+07
High	IsMasterProtein	P05141	ADP/ATP translocase 2 OS=Homo sapiens OX=9606 GN=SLC25A5 PE=1 SV=7	0	FALSE	20.48	20	6	17	2	298	32.8	9.69	43.13	6	4	5.63562e+07	5.31167e+07	5.35603e+07
High	IsMasterProtein	P09874	Poly [ADP-ribose] polymerase 1 OS=Homo sapiens OX=9606 GN=PARP1 PE=1 SV=4	0	FALSE	20.36	8	6	15	6	1014	113	8.88	34.8	6	0	1.25603e+07	1.52426e+07	1.4378e+07
High	IsMasterProtein	P62805	Histone H4 OS=Homo sapiens OX=9606 GN=H4C1 PE=1 SV=2	0	FALSE	20.34	52	7	24	7	103	11.4	11.36	55.55	7	0	4.7342e+07	5.01961e+07	5.1264e+07
High	IsMasterProtein	Q66PJ3	ADP-ribosylation factor-like protein 6-interacting protein 4 OS=Homo sapiens OX=9606 GN=ARL6IP4 PE=1 SV=2	0	FALSE	20.311	16	5	14	5	421	44.9	10.93	38.86	5	0	2.35625e+07	2.54636e+07	2.78059e+07
High	IsMasterProtein	P62888	60S ribosomal protein L30 OS=Homo sapiens OX=9606 GN=RPL30 PE=1 SV=2	0	FALSE	20.211	32	4	11	4	115	12.8	9.63	32.6	4	0	3.07588e+07	2.70432e+07	2.99817e+07
High	IsMasterProtein	P50991	T-complex protein 1 subunit delta OS=Homo sapiens OX=9606 GN=CCT4 PE=1 SV=4	0	FALSE	19.968	10	4	11	4	539	57.9	7.83	29.23	4	0	9.87455e+06	9.37048e+06	1.0837e+07
High	IsMasterProtein	P61513	60S ribosomal protein L37a OS=Homo sapiens OX=9606 GN=RPL37A PE=1 SV=2	0	FALSE	19.803	46	4	18	4	92	10.3	10.43	48.24	4	0	2.956e+07	2.82319e+07	2.9588e+07
High	IsMasterProtein	Q8N9Q2	Protein SREK1IP1 OS=Homo sapiens OX=9606 GN=SREK1IP1 PE=1 SV=1	0	FALSE	19.731	21	4	14	4	155	18.2	9.85	42.42	4	0	2.00693e+07	1.98535e+07	2.1906e+07
High	IsMasterProtein	Q13838	Spliceosome RNA helicase DDX39B OS=Homo sapiens OX=9606 GN=DDX39B PE=1 SV=1	0	FALSE	19.73	13	5	10	5	428	49	5.67	24.14	5	0	1.51168e+07	1.56107e+07	1.70832e+07
High	IsMasterProtein	P17987	T-complex protein 1 subunit alpha OS=Homo sapiens OX=9606 GN=TCP1 PE=1 SV=1	0	FALSE	19.351	18	7	11	7	556	60.3	6.11	25.32	7	0	1.20908e+07	1.27044e+07	1.1171e+07
High	IsMasterProtein	P51991	Heterogeneous nuclear ribonucleoprotein A3 OS=Homo sapiens OX=9606 GN=HNRNPA3 PE=1 SV=2	0	FALSE	19.173	13	5	11	4	378	39.6	9.01	26.56	5	0	9.2757e+06	9.01032e+06	1.01566e+07
High	IsMasterProtein	P60842	Eukaryotic initiation factor 4A-I OS=Homo sapiens OX=9606 GN=EIF4A1 PE=1 SV=1	0	FALSE	18.794	18	6	14	5	406	46.1	5.48	35.6	6	1	2.48628e+07	2.31482e+07	2.12267e+07
High	IsMasterProtein	P52272	Heterogeneous nuclear ribonucleoprotein M OS=Homo sapiens OX=9606 GN=HNRNPM PE=1 SV=3	0	FALSE	18.623	8	4	6	4	730	77.5	8.7	26.1	4	0	9.82652e+06	9.26947e+06	1.00495e+07
High	IsMasterProtein	Q9NWB6	Arginine and glutamate-rich protein 1 OS=Homo sapiens OX=9606 GN=ARGLU1 PE=1 SV=1	0	FALSE	18.518	20	7	32	7	273	33.2	10.35	73.5	7	0	2.28129e+08	2.42673e+08	2.33216e+08
High	IsMasterProtein	P62913	60S ribosomal protein L11 OS=Homo sapiens OX=9606 GN=RPL11 PE=1 SV=2	0	FALSE	17.739	29	5	17	5	178	20.2	9.6	46.26	5	0	2.67315e+07	2.85093e+07	2.8553e+07
High	IsMasterProtein	P34897	Serine hydroxymethyltransferase, mitochondrial OS=Homo sapiens OX=9606 GN=SHMT2 PE=1 SV=3	0	FALSE	17.375	10	5	16	5	504	56	8.53	36.58	5	0	23115713	2.03537e+07	2.159e+07
High	IsMasterProtein	P26583	High mobility group protein B2 OS=Homo sapiens OX=9606 GN=HMGB2 PE=1 SV=2	0	FALSE	17.347	21	4	14	4	209	24	7.81	45.44	4	0	2.71424e+07	2.93585e+07	2.89257e+07
High	IsMasterProtein	P78371	T-complex protein 1 subunit beta OS=Homo sapiens OX=9606 GN=CCT2 PE=1 SV=4	0	FALSE	17.242	8	3	10	3	535	57.5	6.46	21.93	3	0	8.55275e+06	1.00511e+07	7.62686e+06
High	IsMasterProtein	P22102	Trifunctional purine biosynthetic protein adenosine-3 OS=Homo sapiens OX=9606 GN=GART PE=1 SV=1	0	FALSE	17.019	6	5	7	5	1010	107.7	6.7	15.95	5	0	5.06914e+06	5.08507e+06	5.52662e+06
High	IsMasterProtein	P06744	Glucose-6-phosphate isomerase OS=Homo sapiens OX=9606 GN=GPI PE=1 SV=4	0	FALSE	16.943	8	3	9	3	558	63.1	8.32	19.7	3	0	7.23838e+06	8.10835e+06	7.21949e+06
High	IsMasterProtein	P62266	40S ribosomal protein S23 OS=Homo sapiens OX=9606 GN=RPS23 PE=1 SV=3	0	FALSE	16.925	29	5	14	5	143	15.8	10.49	38.41	5	0	4.56377e+07	4.30161e+07	4.53232e+07
High	IsMasterProtein	P12236	ADP/ATP translocase 3 OS=Homo sapiens OX=9606 GN=SLC25A6 PE=1 SV=4	0	FALSE	16.561	17	5	14	1	298	32.8	9.74	34.33	5	0	1.31026e+06		1.34972e+06
High	IsMasterProtein	P22087	rRNA 2'-O-methyltransferase fibrillarin OS=Homo sapiens OX=9606 GN=FBL PE=1 SV=2	0	FALSE	16.473	16	4	10	4	321	33.8	10.18	32.86	4	0	7.16778e+06	8.28067e+06	5.42154e+06
High	IsMasterProtein	Q99832	T-complex protein 1 subunit eta OS=Homo sapiens OX=9606 GN=CCT7 PE=1 SV=2	0	FALSE	16.288	9	4	9	4	543	59.3	7.65	23.03	4	0	1.22591e+07	1.19945e+07	1.07376e+07
High	IsMasterProtein	P62280	40S ribosomal protein S11 OS=Homo sapiens OX=9606 GN=RPS11 PE=1 SV=3	0	FALSE	16.251	30	5	17	5	158	18.4	10.3	28.52	5	0	2.38045e+07	2.15145e+07	2.2349e+07
High	IsMasterProtein	P46781	40S ribosomal protein S9 OS=Homo sapiens OX=9606 GN=RPS9 PE=1 SV=3	0	FALSE	15.981	28	7	23	7	194	22.6	10.65	36.28	7	0	2.44657e+07	2.4999e+07	2.63847e+07
High	IsMasterProtein	P40926	Malate dehydrogenase, mitochondrial OS=Homo sapiens OX=9606 GN=MDH2 PE=1 SV=3	0	FALSE	15.956	19	6	12	6	338	35.5	8.68	28.94	6	0	15654528	1.71987e+07	1.93621e+07
High	IsMasterProtein	P29401	Transketolase OS=Homo sapiens OX=9606 GN=TKT PE=1 SV=3	0	FALSE	14.828	8	3	6	3	623	67.8	7.66	17.03	3	0	5.43346e+06	5.80368e+06	5.9062e+06
High	IsMasterProtein	P62851	40S ribosomal protein S25 OS=Homo sapiens OX=9606 GN=RPS25 PE=1 SV=1	0	FALSE	14.492	35	5	22	5	125	13.7	10.11	55.46	5	0	9.72479e+07	1.01095e+08	1.04447e+08
High	IsMasterProtein	P18621	60S ribosomal protein L17 OS=Homo sapiens OX=9606 GN=RPL17 PE=1 SV=3	0	FALSE	14.414	21	3	9	3	184	21.4	10.17	26.6	3	0	8.32576e+06	7.71826e+06	8.14134e+06
High	IsMasterProtein	P27348	14-3-3 protein theta OS=Homo sapiens OX=9606 GN=YWHAQ PE=1 SV=1	0	FALSE	14.15	23	6	14	2	245	27.7	4.78	30.68	6	1	1.83239e+07	1.97675e+07	1.95894e+07
High	IsMasterProtein	P55769	NHP2-like protein 1 OS=Homo sapiens OX=9606 GN=SNU13 PE=1 SV=3	0	FALSE	13.818	31	3	8	3	128	14.2	8.46	25.7	3	0	8.41011e+06	7.56985e+06	8.25011e+06
High	IsMasterProtein	Q01130	Serine/arginine-rich splicing factor 2 OS=Homo sapiens OX=9606 GN=SRSF2 PE=1 SV=4	0	FALSE	13.57	15	4	14	4	221	25.5	11.85	34.08	4	0	17954804	2.53875e+07	2.49583e+07
High	IsMasterProtein	P62277	40S ribosomal protein S13 OS=Homo sapiens OX=9606 GN=RPS13 PE=1 SV=2	0	FALSE	13.426	26	4	9	4	151	17.2	10.54	28.39	4	0	2.15486e+07	2.04871e+07	2.25849e+07
High	IsMasterProtein	Q14103	Heterogeneous nuclear ribonucleoprotein D0 OS=Homo sapiens OX=9606 GN=HNRNPD PE=1 SV=1	0	FALSE	13.348	9	3	10	2	355	38.4	7.81	33.95	3	1	1.55878e+07	1.70404e+07	1.73139e+07
High	IsMasterProtein	P52209	6-phosphogluconate dehydrogenase, decarboxylating OS=Homo sapiens OX=9606 GN=PGD PE=1 SV=3	0	FALSE	13.314	10	3	6	3	483	53.1	7.23	10.56	3	0	4.75242e+06	5.30842e+06	5.41931e+06
High	IsMasterProtein	P62995	Transformer-2 protein homolog beta OS=Homo sapiens OX=9606 GN=TRA2B PE=1 SV=1	0	FALSE	13.038	14	3	8	3	288	33.6	11.25	22.06	3	0	6.50416e+06	6.94903e+06	7.37714e+06
High	IsMasterProtein	Q96QV6	Histone H2A type 1-A OS=Homo sapiens OX=9606 GN=HIST1H2AA PE=1 SV=3	0	FALSE	12.785	35	4	15	1	131	14.2	10.86	31.81	4	0	490602	552289	555305
High	IsMasterProtein	P30041	Peroxiredoxin-6 OS=Homo sapiens OX=9606 GN=PRDX6 PE=1 SV=3	0	FALSE	12.773	21	5	12	5	224	25	6.38	22.11	5	0	1.54264e+07	1.74376e+07	1.68726e+07
High	IsMasterProtein	P23526	Adenosylhomocysteinase OS=Homo sapiens OX=9606 GN=AHCY PE=1 SV=4	0	FALSE	12.757	9	4	10	4	432	47.7	6.34	23.27	4	0	1.11752e+07	1.13679e+07	1.13295e+07
High	IsMasterProtein	P07910	Heterogeneous nuclear ribonucleoproteins C1/C2 OS=Homo sapiens OX=9606 GN=HNRNPC PE=1 SV=4	0	FALSE	12.751	14	5	10	5	306	33.7	5.08	23.63	5	0	1.41061e+07	1.5616e+07	1.71545e+07
High	IsMasterProtein	O75494	Serine/arginine-rich splicing factor 10 OS=Homo sapiens OX=9606 GN=SRSF10 PE=1 SV=1	0	FALSE	12.659	14	3	13	3	262	31.3	11.27	36.97	3	0	21421894	2.25617e+07	2.70205e+07
High	IsMasterProtein	P62910	60S ribosomal protein L32 OS=Homo sapiens OX=9606 GN=RPL32 PE=1 SV=2	0	FALSE	12.634	17	2	7	2	135	15.9	11.33	20.73	2	0	8.72543e+06	1.0265e+07	1.06814e+07
High	IsMasterProtein	P12268	Inosine-5'-monophosphate dehydrogenase 2 OS=Homo sapiens OX=9606 GN=IMPDH2 PE=1 SV=2	0	FALSE	12.275	7	3	7	3	514	55.8	6.9	22.57	3	0	6.41497e+06	7.49496e+06	8.31139e+06
High	IsMasterProtein	P31948	Stress-induced-phosphoprotein 1 OS=Homo sapiens OX=9606 GN=STIP1 PE=1 SV=1	0	FALSE	12.179	9	4	6	4	543	62.6	6.8	15.17	4	0	4.4175e+06	7.2644e+06	6.38696e+06
High	IsMasterProtein	P27824	Calnexin OS=Homo sapiens OX=9606 GN=CANX PE=1 SV=2	0	FALSE	11.973	8	3	4	3	592	67.5	4.6	10.77	3	0	3869315	4.93694e+06	4.96745e+06
High	IsMasterProtein	Q02543	60S ribosomal protein L18a OS=Homo sapiens OX=9606 GN=RPL18A PE=1 SV=2	0	FALSE	11.592	17	3	12	3	176	20.7	10.71	27.93	3	0	2.49137e+07	2.23451e+07	2.89989e+07
High	IsMasterProtein	P12956	X-ray repair cross-complementing protein 6 OS=Homo sapiens OX=9606 GN=XRCC6 PE=1 SV=2	0	FALSE	11.573	7	3	7	3	609	69.8	6.64	23.09	3	0	4.20332e+06	6.35584e+06	4.57365e+06
High	IsMasterProtein	Q14978	Nucleolar and coiled-body phosphoprotein 1 OS=Homo sapiens OX=9606 GN=NOLC1 PE=1 SV=2	0	FALSE	11.497	7	4	8	4	699	73.6	9.47	11.8	4	0	1.95647e+06	1.80549e+06	4.83051e+06
High	IsMasterProtein	Q15181	Inorganic pyrophosphatase OS=Homo sapiens OX=9606 GN=PPA1 PE=1 SV=2	0	FALSE	11.479	13	2	4	2	289	32.6	5.86	13.95	2	0	2.72308e+06	2.13131e+06	2.4409e+06
High	IsMasterProtein	P31946	14-3-3 protein beta/alpha OS=Homo sapiens OX=9606 GN=YWHAB PE=1 SV=3	0	FALSE	11.463	16	5	11	1	246	28.1	4.83	20.03	5	0	809439	699059
High	IsMasterProtein	P04080	Cystatin-B OS=Homo sapiens OX=9606 GN=CSTB PE=1 SV=2	0	FALSE	11.223	46	3	5	3	98	11.1	7.56	14.93	3	0	11283964	1.15348e+07	1.14558e+07
High	IsMasterProtein	P18124	60S ribosomal protein L7 OS=Homo sapiens OX=9606 GN=RPL7 PE=1 SV=1	0	FALSE	11.166	16	3	10	3	248	29.2	10.65	28.88	3	0	1.13919e+07	1.22525e+07	1.34193e+07
High	IsMasterProtein	P46776	60S ribosomal protein L27a OS=Homo sapiens OX=9606 GN=RPL27A PE=1 SV=2	0	FALSE	11.078	23	3	10	3	148	16.6	11	30.72	3	0	34660684	3.97754e+07	4.26995e+07
High	IsMasterProtein	P08865	40S ribosomal protein SA OS=Homo sapiens OX=9606 GN=RPSA PE=1 SV=4	0	FALSE	11.039	12	3	9	3	295	32.8	4.87	23.05	3	0	8.4065e+06	8.06875e+06	8.38635e+06
High	IsMasterProtein	P19338	Nucleolin OS=Homo sapiens OX=9606 GN=NCL PE=1 SV=3	0	FALSE	10.979	5	4	8	4	710	76.6	4.7	17.95	4	0	1.31504e+07	1.48566e+07	1.30577e+07
High	IsMasterProtein	P40227	T-complex protein 1 subunit zeta OS=Homo sapiens OX=9606 GN=CCT6A PE=1 SV=3	0	FALSE	10.893	8	4	9	4	531	58	6.68	20.75	4	0	8.6285e+06	8.75301e+06	8.01887e+06
High	IsMasterProtein	Q9NR30	Nucleolar RNA helicase 2 OS=Homo sapiens OX=9606 GN=DDX21 PE=1 SV=5	0	FALSE	10.818	5	4	6	4	783	87.3	9.28	13.59	4	0	2.05221e+06	3.61416e+06	2.54106e+06
High	IsMasterProtein	Q15185	Prostaglandin E synthase 3 OS=Homo sapiens OX=9606 GN=PTGES3 PE=1 SV=1	0	FALSE	10.389	19	2	4	2	160	18.7	4.54	14.67	2	0	9.28819e+06	9.28891e+06	1.07336e+07
High	IsMasterProtein	P62081	40S ribosomal protein S7 OS=Homo sapiens OX=9606 GN=RPS7 PE=1 SV=1	0	FALSE	10.371	20	3	4	3	194	22.1	10.1	5.68	3	0	1.67311e+06	1.82233e+06	1.7998e+06
High	IsMasterProtein	Q12931	Heat shock protein 75 kDa, mitochondrial OS=Homo sapiens OX=9606 GN=TRAP1 PE=1 SV=3	0	FALSE	10.302	4	2	2	1	704	80.1	8.21	7.04	2	0	866763	919870	868149
High	IsMasterProtein	P23284	Peptidyl-prolyl cis-trans isomerase B OS=Homo sapiens OX=9606 GN=PPIB PE=1 SV=2	0	FALSE	10.207	15	4	15	3	216	23.7	9.41	25.88	4	0	6.44371e+06	6.50328e+06	6.77088e+06
High	IsMasterProtein	P00558	Phosphoglycerate kinase 1 OS=Homo sapiens OX=9606 GN=PGK1 PE=1 SV=3	0	FALSE	10.11	8	3	5	3	417	44.6	8.1	14.26	3	0	1.00288e+07	1.14194e+07	1.09381e+07
High	IsMasterProtein	Q99497	Protein/nucleic acid deglycase DJ-1 OS=Homo sapiens OX=9606 GN=PARK7 PE=1 SV=2	0	FALSE	10.02	16	2	3	2	189	19.9	6.79	9	2	0	3.79877e+06	5.11834e+06	4.2761e+06
High	IsMasterProtein	P08670	Vimentin OS=Homo sapiens OX=9606 GN=VIM PE=1 SV=4	0	FALSE	9.981	9	4	8	3	466	53.6	5.12	17.24	4	0	5.87954e+06	5.37045e+06	5.02191e+06
High	IsMasterProtein	Q9H3K6	BolA-like protein 2 OS=Homo sapiens OX=9606 GN=BOLA2 PE=1 SV=1	0	FALSE	9.976	41	2	3	2	86	10.1	6.52	7.42	2	0	3.34908e+06	3.77505e+06	3.99142e+06
High	IsMasterProtein	P50990	T-complex protein 1 subunit theta OS=Homo sapiens OX=9606 GN=CCT8 PE=1 SV=4	0	FALSE	9.938	7	4	7	4	548	59.6	5.6	17.24	4	0	6.23227e+06	6.79854e+06	6.42992e+06
High	IsMasterProtein	P13797	Plastin-3 OS=Homo sapiens OX=9606 GN=PLS3 PE=1 SV=4	0	FALSE	9.919	6	3	6	3	630	70.8	5.6	16.49	3	0	3.59202e+06	3.90385e+06	3.93365e+06
High	IsMasterProtein	P48643	T-complex protein 1 subunit epsilon OS=Homo sapiens OX=9606 GN=CCT5 PE=1 SV=1	0	FALSE	9.807	7	3	3	3	541	59.6	5.66	6.89	3	0	4.91632e+06	5.23279e+06	5.92918e+06
High	IsMasterProtein	P62854	40S ribosomal protein S26 OS=Homo sapiens OX=9606 GN=RPS26 PE=1 SV=3	0	FALSE	9.65	29	3	7	3	115	13	11	19.1	3	0	3.20552e+07	2.61319e+07	3.18113e+07
High	IsMasterProtein	Q99714	3-hydroxyacyl-CoA dehydrogenase type-2 OS=Homo sapiens OX=9606 GN=HSD17B10 PE=1 SV=3	0	FALSE	9.518	13	2	3	2	261	26.9	7.78	8.94	2	0	1.67247e+06	1.90666e+06	1.38221e+06
High	IsMasterProtein	P62424	60S ribosomal protein L7a OS=Homo sapiens OX=9606 GN=RPL7A PE=1 SV=2	0	FALSE	9.279	13	3	7	3	266	30	10.61	15.8	3	0	6186212	9.27362e+06	7.52301e+06
High	IsMasterProtein	P67809	Y-box-binding protein 1 OS=Homo sapiens OX=9606 GN=YBX1 PE=1 SV=3	0	FALSE	9.243	15	3	6	3	324	35.9	9.88	7.62	3	0	2.92027e+06	2.98005e+06	3.42591e+06
High	IsMasterProtein	O00571	ATP-dependent RNA helicase DDX3X OS=Homo sapiens OX=9606 GN=DDX3X PE=1 SV=3	0	FALSE	9.042	4	2	2	2	662	73.2	7.18	5.28	2	0	1.74084e+06	2.33024e+06	2.25822e+06
High	IsMasterProtein	P10768	S-formylglutathione hydrolase OS=Homo sapiens OX=9606 GN=ESD PE=1 SV=2	0	FALSE	9.027	15	3	5	3	282	31.4	7.02	14.47	3	0	8719963	9.10712e+06	8.40479e+06
High	IsMasterProtein	O14979	Heterogeneous nuclear ribonucleoprotein D-like OS=Homo sapiens OX=9606 GN=HNRNPDL PE=1 SV=3	0	FALSE	9.021	6	2	4	1	420	46.4	9.57	13.43	2	0	2.62838e+06	3.18219e+06	3.93337e+06
High	IsMasterProtein	P38919	Eukaryotic initiation factor 4A-III OS=Homo sapiens OX=9606 GN=EIF4A3 PE=1 SV=4	0	FALSE	9.001	8	3	8	2	411	46.8	6.73	25.24	3	0	3.6155e+06	3.77918e+06	3.61802e+06
High	IsMasterProtein	P13010	X-ray repair cross-complementing protein 5 OS=Homo sapiens OX=9606 GN=XRCC5 PE=1 SV=3	0	FALSE	8.934	5	4	9	4	732	82.7	5.81	19.69	4	0	6.91994e+06	9.29373e+06	1.01726e+07
High	IsMasterProtein	P14923	Junction plakoglobin OS=Homo sapiens OX=9606 GN=JUP PE=1 SV=3	0	FALSE	8.821	3	2	6	2	745	81.7	6.14	14.66	2	0	2.46824e+06	2.51766e+06	2.39957e+06
High	IsMasterProtein	P62263	40S ribosomal protein S14 OS=Homo sapiens OX=9606 GN=RPS14 PE=1 SV=3	0	FALSE	8.793	17	2	8	2	151	16.3	10.05	16.42	2	0	4.05198e+06	5.6497e+06	5.27107e+06
High	IsMasterProtein	Q15365	Poly(rC)-binding protein 1 OS=Homo sapiens OX=9606 GN=PCBP1 PE=1 SV=2	0	FALSE	8.722	8	2	6	2	356	37.5	7.09	16.43	2	0	6.57084e+06	8.35238e+06	7.7463e+06
High	IsMasterProtein	P31947	14-3-3 protein sigma OS=Homo sapiens OX=9606 GN=SFN PE=1 SV=1	0	FALSE	8.679	11	3	9	1	248	27.8	4.74	15.8	3	0		2.16215e+06	1.94516e+06
High	IsMasterProtein	P40925	Malate dehydrogenase, cytoplasmic OS=Homo sapiens OX=9606 GN=MDH1 PE=1 SV=4	0	FALSE	8.583	9	2	3	2	334	36.4	7.36	7.36	2	0	4.63861e+06	4.52713e+06	5.16161e+06
High	IsMasterProtein	P26641	Elongation factor 1-gamma OS=Homo sapiens OX=9606 GN=EEF1G PE=1 SV=3	0	FALSE	8.128	5	2	5	2	437	50.1	6.67	17.03	2	0	1.4279e+06	1.92761e+06	2.24144e+06
High	IsMasterProtein	P32119	Peroxiredoxin-2 OS=Homo sapiens OX=9606 GN=PRDX2 PE=1 SV=5	0	FALSE	8.119	14	3	10	2	198	21.9	5.97	22.1	3	0	6081728	6.32938e+06	6.56095e+06
High	IsMasterProtein	Q02790	Peptidyl-prolyl cis-trans isomerase FKBP4 OS=Homo sapiens OX=9606 GN=FKBP4 PE=1 SV=3	0	FALSE	7.978	5	2	6	2	459	51.8	5.43	16.2	2	0	4.5747e+06	4.75865e+06	5.508e+06
High	IsMasterProtein	P49411	Elongation factor Tu, mitochondrial OS=Homo sapiens OX=9606 GN=TUFM PE=1 SV=2	0	FALSE	7.449	8	3	4	3	452	49.5	7.61	10.98	3	0	4.8955e+06	5.09416e+06	5.21174e+06
High	IsMasterProtein	P05386	60S acidic ribosomal protein P1 OS=Homo sapiens OX=9606 GN=RPLP1 PE=1 SV=1	0	FALSE	7.412	19	2	6	2	114	11.5	4.32	17.18	2	0	1.08416e+07	1.11821e+07	1.14163e+07
High	IsMasterProtein	Q07020	60S ribosomal protein L18 OS=Homo sapiens OX=9606 GN=RPL18 PE=1 SV=2	0	FALSE	7.326	12	2	4	2	188	21.6	11.72	13.02	2	0	4072752	1.15006e+07	1.20276e+07
High	IsMasterProtein	P35268	60S ribosomal protein L22 OS=Homo sapiens OX=9606 GN=RPL22 PE=1 SV=2	0	FALSE	7.154	16	2	5	1	128	14.8	9.19	14.97	2	0	29526904	2.65682e+07	2.88015e+07
High	IsMasterProtein	P63173	60S ribosomal protein L38 OS=Homo sapiens OX=9606 GN=RPL38 PE=1 SV=2	0	FALSE	7.117	39	3	14	3	70	8.2	10.1	15.11	3	0	99897942	1.0495e+08	1.0462e+08
High	IsMasterProtein	P50395	Rab GDP dissociation inhibitor beta OS=Homo sapiens OX=9606 GN=GDI2 PE=1 SV=2	0	FALSE	7.108	5	2	5	2	445	50.6	6.47	10.81	2	0	3.59993e+06	3.15634e+06	3.93639e+06
High	IsMasterProtein	P17844	Probable ATP-dependent RNA helicase DDX5 OS=Homo sapiens OX=9606 GN=DDX5 PE=1 SV=1	0	FALSE	6.969	5	3	6	2	614	69.1	8.92	13.8	3	1	6.2896e+06	6.29352e+06	6.52296e+06
High	IsMasterProtein	P62861	40S ribosomal protein S30 OS=Homo sapiens OX=9606 GN=FAU PE=1 SV=1	0	FALSE	6.944	19	2	8	2	59	6.6	12.15	17.85	2	0	19746697	2.00663e+07	2.23475e+07
High	IsMasterProtein	Q9NTK5	Obg-like ATPase 1 OS=Homo sapiens OX=9606 GN=OLA1 PE=1 SV=2	0	FALSE	6.857	6	2	3	2	396	44.7	7.81	3.19	2	0	18635879	2.59549e+07	2.97079e+07
High	IsMasterProtein	P54577	Tyrosine--tRNA ligase, cytoplasmic OS=Homo sapiens OX=9606 GN=YARS PE=1 SV=4	0	FALSE	6.828	6	3	5	3	528	59.1	7.05	8.9	3	0	2330835	2.3203e+06	2.24121e+06
High	IsMasterProtein	P61981	14-3-3 protein gamma OS=Homo sapiens OX=9606 GN=YWHAG PE=1 SV=2	0	FALSE	6.645	14	3	8	1	247	28.3	4.89	14.34	3	0	668273	663744	1.00401e+06
High	IsMasterProtein	P23246	Splicing factor, proline- and glutamine-rich OS=Homo sapiens OX=9606 GN=SFPQ PE=1 SV=2	0	FALSE	6.64	4	2	3	2	707	76.1	9.44	7.41	2	0	2.69536e+06	2.60934e+06	2.9885e+06
High	IsMasterProtein	P62244	40S ribosomal protein S15a OS=Homo sapiens OX=9606 GN=RPS15A PE=1 SV=2	0	FALSE	6.62	16	2	6	2	130	14.8	10.13	17.05	2	0	6017078	5.60557e+06	6.44799e+06
High	IsMasterProtein	Q9UMS4	Pre-mRNA-processing factor 19 OS=Homo sapiens OX=9606 GN=PRPF19 PE=1 SV=1	0	FALSE	6.558	5	2	4	2	504	55.1	6.61	8.59	2	0	2.8012e+06	3.37325e+06	3.33804e+06
High	IsMasterProtein	Q9Y5L4	Mitochondrial import inner membrane translocase subunit Tim13 OS=Homo sapiens OX=9606 GN=TIMM13 PE=1 SV=1	0	FALSE	6.429	31	2	3	2	95	10.5	8.18	8.4	2	0	2.34622e+06	2.08468e+06	2.3965e+06
High	IsMasterProtein	P40429	60S ribosomal protein L13a OS=Homo sapiens OX=9606 GN=RPL13A PE=1 SV=2	0	FALSE	6.415	18	4	8	4	203	23.6	10.93	6.87	4	0	1.57368e+07	2.08806e+07	1.89542e+07
High	IsMasterProtein	P62899	60S ribosomal protein L31 OS=Homo sapiens OX=9606 GN=RPL31 PE=1 SV=1	0	FALSE	6.347	18	2	2	2	125	14.5	10.54	5.31	2	0	1.02374e+07	9.09264e+06	9.29182e+06
High	IsMasterProtein	P14866	Heterogeneous nuclear ribonucleoprotein L OS=Homo sapiens OX=9606 GN=HNRNPL PE=1 SV=2	0	FALSE	6.228	4	2	2	2	589	64.1	8.22	5.12	2	0	5.9684e+06	5.55043e+06	6.45869e+06
High	IsMasterProtein	P28074	Proteasome subunit beta type-5 OS=Homo sapiens OX=9606 GN=PSMB5 PE=1 SV=3	0	FALSE	6.166	10	2	4	2	263	28.5	6.92	11.03	2	0	4.60591e+06	4.78707e+06	5.4993e+06
High	IsMasterProtein	P41567	Eukaryotic translation initiation factor 1 OS=Homo sapiens OX=9606 GN=EIF1 PE=1 SV=1	0	FALSE	6.106	24	2	2	2	113	12.7	7.44	2.31	2	0	1.95092e+06	1.69841e+06	1.943e+06
High	IsMasterProtein	Q9BVC6	Transmembrane protein 109 OS=Homo sapiens OX=9606 GN=TMEM109 PE=1 SV=1	0	FALSE	6.092	9	2	2	2	243	26.2	10.48	4.63	2	0	3.94399e+06	3.66039e+06	3.99688e+06
High	IsMasterProtein	P25788	Proteasome subunit alpha type-3 OS=Homo sapiens OX=9606 GN=PSMA3 PE=1 SV=2	0	FALSE	6.085	9	2	4	2	255	28.4	5.33	11.4	2	0	3.51058e+06	2.03527e+06	4.46162e+06
High	IsMasterProtein	Q92598	Heat shock protein 105 kDa OS=Homo sapiens OX=9606 GN=HSPH1 PE=1 SV=1	0	FALSE	6.078	3	3	6	3	858	96.8	5.39	10.79	3	0	2.72858e+06	3.09469e+06	3.23755e+06
High	IsMasterProtein	Q92945	Far upstream element-binding protein 2 OS=Homo sapiens OX=9606 GN=KHSRP PE=1 SV=4	0	FALSE	5.978	3	2	4	2	711	73.1	7.3	7.95	2	0	2.75469e+06	3.02255e+06	3.26466e+06
High	IsMasterProtein	P38646	Stress-70 protein, mitochondrial OS=Homo sapiens OX=9606 GN=HSPA9 PE=1 SV=2	0	FALSE	5.849	4	2	2	2	679	73.6	6.16	5.5	2	0	3.43595e+06	3.84487e+06	4.31148e+06
High	IsMasterProtein	P07355	Annexin A2 OS=Homo sapiens OX=9606 GN=ANXA2 PE=1 SV=2	0	FALSE	5.805	6	2	3	2	339	38.6	7.75	7.07	2	0	1.94714e+06	1.65965e+06	1.70129e+06
High	IsMasterProtein	P30044	Peroxiredoxin-5, mitochondrial OS=Homo sapiens OX=9606 GN=PRDX5 PE=1 SV=4	0	FALSE	5.795	15	2	3	2	214	22.1	8.7	8.38	2	0	1.43395e+06	1.66238e+06	2.02423e+06
High	IsMasterProtein	Q7Z4W1	L-xylulose reductase OS=Homo sapiens OX=9606 GN=DCXR PE=1 SV=2	0	FALSE	5.734	9	2	3	2	244	25.9	8.1	4.84	2	0	1.18738e+06	1.48935e+06	1.48997e+06
High	IsMasterProtein	P62753	40S ribosomal protein S6 OS=Homo sapiens OX=9606 GN=RPS6 PE=1 SV=1	0	FALSE	5.531	10	2	3	2	249	28.7	10.84	7.66	2	0	3.83523e+06	4.02534e+06	4.11829e+06
High	IsMasterProtein	O43143	Pre-mRNA-splicing factor ATP-dependent RNA helicase DHX15 OS=Homo sapiens OX=9606 GN=DHX15 PE=1 SV=2	0	FALSE	5.42	3	2	3	2	795	90.9	7.46	2.35	2	0	1.88522e+06	1.46911e+06	1.61114e+06
High	IsMasterProtein	Q7L014	Probable ATP-dependent RNA helicase DDX46 OS=Homo sapiens OX=9606 GN=DDX46 PE=1 SV=2	0	FALSE	5.418	2	2	5	2	1031	117.3	9.29	11.67	2	0	5.50411e+06	5.75487e+06	5.98924e+06
High	IsMasterProtein	Q08170	Serine/arginine-rich splicing factor 4 OS=Homo sapiens OX=9606 GN=SRSF4 PE=1 SV=2	0	FALSE	5.387	5	3	6	3	494	56.6	11.52	9.96	3	0	16187934	1.53311e+07	1.41386e+07
High	IsMasterProtein	Q96IZ7	Serine/Arginine-related protein 53 OS=Homo sapiens OX=9606 GN=RSRC1 PE=1 SV=1	0	FALSE	5.287	7	2	5	2	334	38.7	11.08	8.08	2	0	3.43081e+06	3.8896e+06	2.25954e+06
High	IsMasterProtein	P26373	60S ribosomal protein L13 OS=Homo sapiens OX=9606 GN=RPL13 PE=1 SV=4	0	FALSE	5.252	9	2	6	2	211	24.2	11.65	15.14	2	0	6686187	5.9731e+06	2.90095e+06
High	IsMasterProtein	P62249	40S ribosomal protein S16 OS=Homo sapiens OX=9606 GN=RPS16 PE=1 SV=2	0	FALSE	5.174	16	2	4	2	146	16.4	10.21	11.6	2	0	6.27207e+06	6.22848e+06	3.39335e+06
High	IsMasterProtein	Q92841-1	Isoform 2 of Probable ATP-dependent RNA helicase DDX17 OS=Homo sapiens OX=9606 GN=DDX17	0	FALSE	5.156	3	2	5	1	650	72.3	8.59	11.16	2	0	2.18992e+06	2.45368e+06	2.62158e+06
High	IsMasterProtein	P15924	Desmoplakin OS=Homo sapiens OX=9606 GN=DSP PE=1 SV=3	0	FALSE	5.143	1	3	5	3	2871	331.6	6.81	6.73	3	0	2.22517e+06	2.53303e+06	2.67769e+06
High	IsMasterProtein	P35232	Prohibitin OS=Homo sapiens OX=9606 GN=PHB PE=1 SV=1	0	FALSE	5.088	8	2	5	2	272	29.8	5.76	13	2	0	3888781	6.05013e+06	5.29324e+06
High	IsMasterProtein	P35659	Protein DEK OS=Homo sapiens OX=9606 GN=DEK PE=1 SV=1	0	FALSE	5.077	5	2	4	2	375	42.6	8.56	9.83	2	0	4.37489e+06	4.42305e+06	4.73276e+06
High	IsMasterProtein	P61353	60S ribosomal protein L27 OS=Homo sapiens OX=9606 GN=RPL27 PE=1 SV=2	0	FALSE	4.992	13	2	11	2	136	15.8	10.56	22.79	2	0	2.73778e+07	3.78406e+07	3.44731e+07
High	IsMasterProtein	P60900	Proteasome subunit alpha type-6 OS=Homo sapiens OX=9606 GN=PSMA6 PE=1 SV=1	0	FALSE	4.91	9	2	2	2	246	27.4	6.76	4.45	2	0	2.44836e+06	2.13871e+06	2.21662e+06
High	IsMasterProtein	P24752	Acetyl-CoA acetyltransferase, mitochondrial OS=Homo sapiens OX=9606 GN=ACAT1 PE=1 SV=1	0	FALSE	4.47	5	2	5	2	427	45.2	8.85	8.81	2	0	1.07464e+06	1.03565e+06	1.06212e+06
High	IsMasterProtein	P60866	40S ribosomal protein S20 OS=Homo sapiens OX=9606 GN=RPS20 PE=1 SV=1	0	FALSE	4.449	15	2	3	2	119	13.4	9.94	7.29	2	0	18444873	1.44728e+07	1.55234e+07
High	IsMasterProtein	P27695	DNA-(apurinic or apyrimidinic site) lyase OS=Homo sapiens OX=9606 GN=APEX1 PE=1 SV=2	0	FALSE	4.342	7	2	3	2	318	35.5	8.12	1.91	2	0	2.63811e+06	2.6718e+06	3.04627e+06
High	IsMasterProtein	Q9P2J5	Leucine--tRNA ligase, cytoplasmic OS=Homo sapiens OX=9606 GN=LARS PE=1 SV=2	0	FALSE	4.304	2	2	2	2	1176	134.4	7.3	4.34	2	0	1.62333e+06	3.73119e+06	3.19479e+06
High	IsMasterProtein	P84243	Histone H3.3 OS=Homo sapiens OX=9606 GN=H3-3A PE=1 SV=2	0	FALSE	3.928	12	2	6	2	136	15.3	11.27	13.04	2	0	3.79659e+07	3.66735e+07	3.39426e+07
High	IsMasterProtein	P13667	Protein disulfide-isomerase A4 OS=Homo sapiens OX=9606 GN=PDIA4 PE=1 SV=2	0	FALSE	3.902	3	2	5	2	645	72.9	5.07	4.22	2	0	1.92151e+06	1.55431e+06	2.36693e+06
High	IsMasterProtein	P83731	60S ribosomal protein L24 OS=Homo sapiens OX=9606 GN=RPL24 PE=1 SV=1	0	FALSE	3.703	11	2	4	2	157	17.8	11.25	7.4	2	0	3.12688e+06	3.51113e+06	3.22384e+06
High	IsMasterProtein	Q9H7C9	Mth938 domain-containing protein OS=Homo sapiens OX=9606 GN=AAMDC PE=1 SV=1	0	FALSE	3.678	20	2	5	2	122	13.3	8.46	9.02	2	0	2.89145e+06	3.01288e+06	2.87023e+06
High	IsMasterProtein	Q9UQ80	Proliferation-associated protein 2G4 OS=Homo sapiens OX=9606 GN=PA2G4 PE=1 SV=3	0	FALSE	3.648	3	2	2	2	394	43.8	6.55	0	2	0	3.15759e+06	2.86068e+06	3.98944e+06
High	IsMasterProtein	Q13151	Heterogeneous nuclear ribonucleoprotein A0 OS=Homo sapiens OX=9606 GN=HNRNPA0 PE=1 SV=1	0	FALSE	3.488	5	2	4	1	305	30.8	9.29	9.39	2	0	1.50386e+06	1.32658e+06	1.47437e+06
High	IsMasterProtein	P49189	4-trimethylaminobutyraldehyde dehydrogenase OS=Homo sapiens OX=9606 GN=ALDH9A1 PE=1 SV=3	0	FALSE	3.149	5	2	2	2	494	53.8	5.87	0	2	0	1.65899e+06	2.31666e+06	1.43049e+06
High	IsMasterProtein	P21108	Ribose-phosphate pyrophosphokinase 3 OS=Homo sapiens OX=9606 GN=PRPS1L1 PE=1 SV=2	0	FALSE	3.088	5	2	5	2	318	34.8	6.35	10.51	2	0	5457588	5.94215e+06	5.71387e+06
High	IsMasterProtein	Q6P5R6	60S ribosomal protein L22-like 1 OS=Homo sapiens OX=9606 GN=RPL22L1 PE=1 SV=2	0	FALSE	2.98	12	2	2	1	122	14.6	9.38	4.06	2	1	4.56136e+06	5.74628e+06	6.47879e+06
High	IsMasterProtein	P38159	RNA-binding motif protein, X chromosome OS=Homo sapiens OX=9606 GN=RBMX PE=1 SV=3	0	FALSE	2.739	5	2	3	2	391	42.3	10.05	2.05	2	0	567769	1.28488e+06	1.4201e+06
High	IsMasterProtein	O43684	Mitotic checkpoint protein BUB3 OS=Homo sapiens OX=9606 GN=BUB3 PE=1 SV=1	0	FALSE	2.737	4	2	4	2	328	37.1	6.84	4.09	2	0	1.04146e+06	3.05086e+06	3.48075e+06

## Sheet: s2_Olfr544-AirID
Protein FDR Confidence Combined	Master	Accession	Description	Exp q-value Combined	Contaminant	Sum PEP Score	Coverage in Percent	Number of Peptides	Number of PSMs	Number of Unique Peptides	Number of AAs	MW in kDa	calc pI	Score Sequest HT	Number of Peptides by Sequest HT	Number of Razor Peptides	Abundances Normalized Meas. 1	Abundances Normalized Meas. 2	Abundances Normalized Meas. 3
High	IsMasterProtein	P49327	Fatty acid synthase OS=Homo sapiens OX=9606 GN=FASN PE=1 SV=3	0	FALSE	480.574	42	74	268	74	2511	273.3	6.44	940.33	74	0	1.09207e+09	1.02559e+09	9.97344e+08
High	IsMasterProtein	P11498	Pyruvate carboxylase, mitochondrial OS=Homo sapiens OX=9606 GN=PC PE=1 SV=2	0	FALSE	359.716	62	51	246	51	1178	129.6	6.84	777.21	51	0	1.30214e+09	1.28433e+09	1.20452e+09
High	IsMasterProtein	P05165	Propionyl-CoA carboxylase alpha chain, mitochondrial OS=Homo sapiens OX=9606 GN=PCCA PE=1 SV=4	0	FALSE	217.75	55	37	135	37	728	80	7.52	412.09	37	0	7.41348e+08	6.98642e+08	7.16663e+08
High	IsMasterProtein	P42167	Lamina-associated polypeptide 2, isoforms beta/gamma OS=Homo sapiens OX=9606 GN=TMPO PE=1 SV=2	0	FALSE	216.065	56	20	150	20	454	50.6	9.38	567.74	20	0	1.60364e+09	1.5711e+09	1.54117e+09
High	IsMasterProtein	P0DMV9	Heat shock 70 kDa protein 1B OS=Homo sapiens OX=9606 GN=HSPA1B PE=1 SV=1	0	FALSE	178.86	52	25	99	23	641	70	5.66	346.57	25	2	5.99733e+08	5.84421e+08	5.51894e+08
High	IsMasterProtein	P68363	Tubulin alpha-1B chain OS=Homo sapiens OX=9606 GN=TUBA1B PE=1 SV=1	0	FALSE	167.034	53	20	120	3	451	50.1	5.06	428.67	20	17	8.03195e+08	7.56377e+08	716187690
High	IsMasterProtein	P07900	Heat shock protein HSP 90-alpha OS=Homo sapiens OX=9606 GN=HSP90AA1 PE=1 SV=5	0	FALSE	157.739	42	27	123	21	732	84.6	5.02	347.83	27	7	6.50914e+08	6.48437e+08	6.51018e+08
High	IsMasterProtein	Q71U36	Tubulin alpha-1A chain OS=Homo sapiens OX=9606 GN=TUBA1A PE=1 SV=1	0	FALSE	147.7	53	19	101	2	451	50.1	5.06	369.02	19	0	1.54475e+07	1.5431e+07	1.43272e+07
High	IsMasterProtein	P08238	Heat shock protein HSP 90-beta OS=Homo sapiens OX=9606 GN=HSP90AB1 PE=1 SV=4	0	FALSE	133.886	37	24	120	14	724	83.2	5.03	350.27	24	4	4.61183e+08	4.3609e+08	4.26944e+08
High	IsMasterProtein	P78527	DNA-dependent protein kinase catalytic subunit OS=Homo sapiens OX=9606 GN=PRKDC PE=1 SV=3	0	FALSE	128.091	11	34	68	34	4128	468.8	7.12	168.29	34	0	8.41674e+07	9.09493e+07	7.00383e+07
High	IsMasterProtein	P13639	Elongation factor 2 OS=Homo sapiens OX=9606 GN=EEF2 PE=1 SV=4	0	FALSE	126.766	37	27	94	27	858	95.3	6.83	245.58	27	0	2.58879e+08	2.57943e+08	2.45421e+08
High	IsMasterProtein	Q96A33	Coiled-coil domain-containing protein 47 OS=Homo sapiens OX=9606 GN=CCDC47 PE=1 SV=1	0	FALSE	123.719	32	19	86	19	483	55.8	4.87	286.35	19	0	6.54772e+08	6.73707e+08	6.38528e+08
High	IsMasterProtein	Q00610	Clathrin heavy chain 1 OS=Homo sapiens OX=9606 GN=CLTC PE=1 SV=5	0	FALSE	123.683	19	24	51	24	1675	191.5	5.69	158.02	24	0	8.36706e+07	8.44484e+07	7.75375e+07
High	IsMasterProtein	Q96RQ3	Methylcrotonoyl-CoA carboxylase subunit alpha, mitochondrial OS=Homo sapiens OX=9606 GN=MCCC1 PE=1 SV=3	0	FALSE	120.272	33	19	87	19	725	80.4	7.78	274.34	19	0	4.56826e+08	4.42754e+08	4.23433e+08
High	IsMasterProtein	P07437	Tubulin beta chain OS=Homo sapiens OX=9606 GN=TUBB PE=1 SV=2	0	FALSE	120.169	60	19	101	4	444	49.6	4.89	308.23	19	17	4.16861e+08	4.09692e+08	3.9031e+08
High	IsMasterProtein	P50990	T-complex protein 1 subunit theta OS=Homo sapiens OX=9606 GN=CCT8 PE=1 SV=4	0	FALSE	112.188	44	21	77	21	548	59.6	5.6	233.84	21	0	3.28676e+08	3.13549e+08	2.75006e+08
High	IsMasterProtein	Q7Z2W4	Zinc finger CCCH-type antiviral protein 1 OS=Homo sapiens OX=9606 GN=ZC3HAV1 PE=1 SV=3	0	FALSE	108.827	31	24	64	24	902	101.4	8.4	196.33	24	0	1.13646e+08	1.08791e+08	1.04737e+08
High	IsMasterProtein	Q08211	ATP-dependent RNA helicase A OS=Homo sapiens OX=9606 GN=DHX9 PE=1 SV=4	0	FALSE	104.485	22	22	53	22	1270	140.9	6.84	164	22	0	7.40927e+07	7.85389e+07	6.9566e+07
High	IsMasterProtein	Q9UGP8	Translocation protein SEC63 homolog OS=Homo sapiens OX=9606 GN=SEC63 PE=1 SV=2	0	FALSE	103.643	25	15	58	15	760	87.9	5.31	187.87	15	0	1.73348e+08	1.59923e+08	1.60486e+08
High	IsMasterProtein	P11142	Heat shock cognate 71 kDa protein OS=Homo sapiens OX=9606 GN=HSPA8 PE=1 SV=1	0	FALSE	101.204	28	14	56	11	646	70.9	5.52	186.38	14	1	1.38855e+08	1.33648e+08	1.21109e+08
High	IsMasterProtein	Q9BSJ8	Extended synaptotagmin-1 OS=Homo sapiens OX=9606 GN=ESYT1 PE=1 SV=1	0	FALSE	97.608	26	18	46	18	1104	122.8	5.83	151.97	18	0	8.1987e+07	8.02673e+07	7.44279e+07
High	IsMasterProtein	P07195	L-lactate dehydrogenase B chain OS=Homo sapiens OX=9606 GN=LDHB PE=1 SV=2	0	FALSE	96.785	40	13	74	12	334	36.6	6.05	212.55	13	0	4.20209e+08	4.07656e+08	3.97109e+08
High	IsMasterProtein	P63244	Receptor of activated protein C kinase 1 OS=Homo sapiens OX=9606 GN=RACK1 PE=1 SV=3	0	FALSE	95.706	57	12	43	12	317	35.1	7.69	148.38	12	0	1.69613e+08	1.7039e+08	1.56924e+08
High	IsMasterProtein	P84103	Serine/arginine-rich splicing factor 3 OS=Homo sapiens OX=9606 GN=SRSF3 PE=1 SV=1	0	FALSE	91.6	53	11	83	10	164	19.3	11.65	236.17	11	1	4.52206e+08	4.43041e+08	4.35221e+08
High	IsMasterProtein	Q04637	Eukaryotic translation initiation factor 4 gamma 1 OS=Homo sapiens OX=9606 GN=EIF4G1 PE=1 SV=4	0	FALSE	91.473	15	20	57	20	1599	175.4	5.33	165.67	20	0	1.50555e+08	1.50969e+08	1.41952e+08
High	IsMasterProtein	P61978	Heterogeneous nuclear ribonucleoprotein K OS=Homo sapiens OX=9606 GN=HNRNPK PE=1 SV=1	0	FALSE	88.473	38	14	54	14	463	50.9	5.54	177.28	14	0	1.94405e+08	1.74225e+08	171055385
High	IsMasterProtein	P68104	Elongation factor 1-alpha 1 OS=Homo sapiens OX=9606 GN=EEF1A1 PE=1 SV=1	0	FALSE	85.074	31	11	61	11	462	50.1	9.01	209.35	11	0	5.55049e+08	5.43135e+08	5.25755e+08
High	IsMasterProtein	P68371	Tubulin beta-4B chain OS=Homo sapiens OX=9606 GN=TUBB4B PE=1 SV=1	0	FALSE	83.565	47	16	80	1	445	49.8	4.89	230.15	16	0	8.13978e+06	7.32835e+06	7.2693e+06
High	IsMasterProtein	Q00839	Heterogeneous nuclear ribonucleoprotein U OS=Homo sapiens OX=9606 GN=HNRNPU PE=1 SV=6	0	FALSE	83.398	19	15	53	15	825	90.5	6	151.71	15	0	2.29834e+08	2.21222e+08	2.08454e+08
High	IsMasterProtein	P14618	Pyruvate kinase PKM OS=Homo sapiens OX=9606 GN=PKM PE=1 SV=4	0	FALSE	81.612	40	15	45	15	531	57.9	7.84	148.98	15	0	1.15078e+08	1.05576e+08	1.02338e+08
High	IsMasterProtein	P07814	Bifunctional glutamate/proline--tRNA ligase OS=Homo sapiens OX=9606 GN=EPRS PE=1 SV=5	0	FALSE	78.819	18	18	36	18	1512	170.5	7.33	112.52	18	0	6.01055e+07	5.83405e+07	5.3587e+07
High	IsMasterProtein	Q07065	Cytoskeleton-associated protein 4 OS=Homo sapiens OX=9606 GN=CKAP4 PE=1 SV=2	0	FALSE	75.863	24	12	44	12	602	66	5.92	144.29	12	0	1.24158e+08	1.14859e+08	1.09729e+08
High	IsMasterProtein	Q14697	Neutral alpha-glucosidase AB OS=Homo sapiens OX=9606 GN=GANAB PE=1 SV=3	0	FALSE	72.403	25	19	42	19	944	106.8	6.14	107.03	19	0	1.44147e+08	1.38575e+08	1.29582e+08
High	IsMasterProtein	P00338	L-lactate dehydrogenase A chain OS=Homo sapiens OX=9606 GN=LDHA PE=1 SV=2	0	FALSE	66.852	45	15	60	14	332	36.7	8.27	143.33	15	1	3.92651e+08	3.66028e+08	3.64347e+08
High	IsMasterProtein	P04350	Tubulin beta-4A chain OS=Homo sapiens OX=9606 GN=TUBB4A PE=1 SV=2	0	FALSE	66.795	39	13	65	1	444	49.6	4.88	181.98	13	0	1.68913e+06	1.16945e+06	1.47001e+06
High	IsMasterProtein	P62258	14-3-3 protein epsilon OS=Homo sapiens OX=9606 GN=YWHAE PE=1 SV=1	0	FALSE	66.224	52	12	47	10	255	29.2	4.74	130.27	12	2	3.07161e+08	2.93225e+08	2.82376e+08
High	IsMasterProtein	P09874	Poly [ADP-ribose] polymerase 1 OS=Homo sapiens OX=9606 GN=PARP1 PE=1 SV=4	0	FALSE	64.212	18	13	35	13	1014	113	8.88	106.6	13	0	8.45144e+07	8.5332e+07	8.09998e+07
High	IsMasterProtein	O75533	Splicing factor 3B subunit 1 OS=Homo sapiens OX=9606 GN=SF3B1 PE=1 SV=3	0	FALSE	63.919	12	12	29	12	1304	145.7	7.09	82.32	12	0	3.91993e+07	4.03603e+07	26645810
High	IsMasterProtein	Q86TX2	Acyl-coenzyme A thioesterase 1 OS=Homo sapiens OX=9606 GN=ACOT1 PE=1 SV=1	0	FALSE	63.197	43	14	40	1	421	46.2	7.34	113.82	14	0	1.62919e+06	1.59213e+06	1.19275e+06
High	IsMasterProtein	Q9Y383	Putative RNA-binding protein Luc7-like 2 OS=Homo sapiens OX=9606 GN=LUC7L2 PE=1 SV=2	0	FALSE	62.479	31	11	47	8	392	46.5	10.01	143.73	11	3	1.98869e+08	1.81794e+08	1.99848e+08
High	IsMasterProtein	Q96D71	RalBP1-associated Eps domain-containing protein 1 OS=Homo sapiens OX=9606 GN=REPS1 PE=1 SV=3	0	FALSE	61.773	19	10	32	10	796	86.6	5.69	100.63	10	0	4.40095e+07	4.06996e+07	4.02312e+07
High	IsMasterProtein	Q14498	RNA-binding protein 39 OS=Homo sapiens OX=9606 GN=RBM39 PE=1 SV=2	0	FALSE	59.92	25	10	34	10	530	59.3	10.1	108.51	10	0	1.2946e+08	1.21179e+08	1.19153e+08
High	IsMasterProtein	P49753	Acyl-coenzyme A thioesterase 2, mitochondrial OS=Homo sapiens OX=9606 GN=ACOT2 PE=1 SV=6	0	FALSE	59.702	35	14	42	1	483	53.2	8.47	116.4	14	13	1.74088e+08	1.78262e+08	1.66864e+08
High	IsMasterProtein	P08670	Vimentin OS=Homo sapiens OX=9606 GN=VIM PE=1 SV=4	0	FALSE	59.429	27	10	35	9	466	53.6	5.12	100.22	10	0	9.7868e+07	9.03424e+07	8.85472e+07
High	IsMasterProtein	P37802	Transgelin-2 OS=Homo sapiens OX=9606 GN=TAGLN2 PE=1 SV=3	0	FALSE	59.095	50	9	37	9	199	22.4	8.25	112.15	9	0	6.6298e+07	5.8863e+07	5.7914e+07
High	IsMasterProtein	P22234	Multifunctional protein ADE2 OS=Homo sapiens OX=9606 GN=PAICS PE=1 SV=3	0	FALSE	58.929	33	12	35	12	425	47	7.23	97.16	12	0	1.04391e+08	1.01039e+08	1.04349e+08
High	IsMasterProtein	P13010	X-ray repair cross-complementing protein 5 OS=Homo sapiens OX=9606 GN=XRCC5 PE=1 SV=3	0	FALSE	58.78	25	15	42	15	732	82.7	5.81	115.81	15	0	9.84542e+07	1.04617e+08	9.42995e+07
High	IsMasterProtein	Q14974	Importin subunit beta-1 OS=Homo sapiens OX=9606 GN=KPNB1 PE=1 SV=2	0	FALSE	57.854	20	13	35	13	876	97.1	4.78	89.67	13	0	1.33087e+08	1.30031e+08	1.19399e+08
High	IsMasterProtein	P63104	14-3-3 protein zeta/delta OS=Homo sapiens OX=9606 GN=YWHAZ PE=1 SV=1	0	FALSE	57.833	42	10	47	6	245	27.7	4.79	127.64	10	3	1.13544e+08	1.04116e+08	1.08313e+08
High	IsMasterProtein	P06733	Alpha-enolase OS=Homo sapiens OX=9606 GN=ENO1 PE=1 SV=2	0	FALSE	57.731	35	11	28	11	434	47.1	7.39	82.56	11	0	7.95892e+07	7.54042e+07	7.04806e+07
High	IsMasterProtein	P21333	Filamin-A OS=Homo sapiens OX=9606 GN=FLNA PE=1 SV=4	0	FALSE	57.594	6	11	30	11	2647	280.6	6.06	84.67	11	0	5.18677e+07	5.03462e+07	4.82741e+07
High	IsMasterProtein	Q9Y5M8	Signal recognition particle receptor subunit beta OS=Homo sapiens OX=9606 GN=SRPRB PE=1 SV=3	0	FALSE	57.439	39	10	40	10	271	29.7	9.04	118.11	10	0	1.821e+08	1.73201e+08	165193271
High	IsMasterProtein	Q14739	Delta(14)-sterol reductase LBR OS=Homo sapiens OX=9606 GN=LBR PE=1 SV=2	0	FALSE	57.38	22	11	40	11	615	70.7	9.36	110.59	11	0	2.37342e+08	2.33622e+08	2.05806e+08
High	IsMasterProtein	Q86UP2	Kinectin OS=Homo sapiens OX=9606 GN=KTN1 PE=1 SV=1	0	FALSE	53.886	10	12	27	12	1357	156.2	5.64	89.24	12	0	4.79767e+07	4.78134e+07	5.98045e+07
High	IsMasterProtein	P62241	40S ribosomal protein S8 OS=Homo sapiens OX=9606 GN=RPS8 PE=1 SV=2	0	FALSE	52.146	54	11	35	11	208	24.2	10.32	99.08	11	0	1.14686e+08	1.0886e+08	1.04225e+08
High	IsMasterProtein	P04406	Glyceraldehyde-3-phosphate dehydrogenase OS=Homo sapiens OX=9606 GN=GAPDH PE=1 SV=3	0	FALSE	51.753	35	8	34	8	335	36	8.46	123.97	8	0	9.40965e+07	9.53775e+07	9.04544e+07
High	IsMasterProtein	P27824	Calnexin OS=Homo sapiens OX=9606 GN=CANX PE=1 SV=2	0	FALSE	51.175	19	9	39	9	592	67.5	4.6	126.57	9	0	1.39559e+08	1.37355e+08	124556672
High	IsMasterProtein	P23396	40S ribosomal protein S3 OS=Homo sapiens OX=9606 GN=RPS3 PE=1 SV=2	0	FALSE	50.598	58	13	43	13	243	26.7	9.66	119.9	13	0	1.44215e+08	1.46437e+08	132354235
High	IsMasterProtein	P22314	Ubiquitin-like modifier-activating enzyme 1 OS=Homo sapiens OX=9606 GN=UBA1 PE=1 SV=3	0	FALSE	49.582	12	8	15	8	1058	117.8	5.76	54.14	8	0	1.9906e+07	1.84598e+07	2.08363e+07
High	IsMasterProtein	P22102	Trifunctional purine biosynthetic protein adenosine-3 OS=Homo sapiens OX=9606 GN=GART PE=1 SV=1	0	FALSE	47.892	16	11	27	11	1010	107.7	6.7	68.14	11	0	1.61489e+08	1.39774e+08	1.39662e+08
High	IsMasterProtein	P05388	60S acidic ribosomal protein P0 OS=Homo sapiens OX=9606 GN=RPLP0 PE=1 SV=1	0	FALSE	47.577	34	7	28	7	317	34.3	5.97	100.84	7	0	9.49756e+07	9.41507e+07	84539910
High	IsMasterProtein	P09651	Heterogeneous nuclear ribonucleoprotein A1 OS=Homo sapiens OX=9606 GN=HNRNPA1 PE=1 SV=5	0	FALSE	47.221	25	8	28	7	372	38.7	9.13	82.26	8	1	6.39189e+07	6.37592e+07	6.27429e+07
High	IsMasterProtein	O95292	Vesicle-associated membrane protein-associated protein B/C OS=Homo sapiens OX=9606 GN=VAPB PE=1 SV=3	0	FALSE	46.225	27	6	29	6	243	27.2	7.3	103.98	6	0	1.17832e+08	9.96961e+07	9.882e+07
High	IsMasterProtein	P26641	Elongation factor 1-gamma OS=Homo sapiens OX=9606 GN=EEF1G PE=1 SV=3	0	FALSE	46.019	22	10	32	10	437	50.1	6.67	86.32	10	0	7.66127e+07	6.74611e+07	6.97039e+07
High	IsMasterProtein	P36578	60S ribosomal protein L4 OS=Homo sapiens OX=9606 GN=RPL4 PE=1 SV=5	0	FALSE	45.699	26	9	29	9	427	47.7	11.06	88.9	9	0	8.41265e+07	8.72259e+07	84961197
High	IsMasterProtein	P25705	ATP synthase subunit alpha, mitochondrial OS=Homo sapiens OX=9606 GN=ATP5F1A PE=1 SV=1	0	FALSE	45.452	22	8	22	8	553	59.7	9.13	79.26	8	0	4.50659e+07	4.18019e+07	3.94868e+07
High	IsMasterProtein	Q92616	eIF-2-alpha kinase activator GCN1 OS=Homo sapiens OX=9606 GN=GCN1 PE=1 SV=6	0	FALSE	44.063	7	12	20	12	2671	292.6	7.47	47.25	12	0	2.33813e+07	2.1882e+07	2.04073e+07
High	IsMasterProtein	Q9UHB9	Signal recognition particle subunit SRP68 OS=Homo sapiens OX=9606 GN=SRP68 PE=1 SV=2	0	FALSE	43.912	24	11	24	11	627	70.7	8.56	54.05	11	0	3.89127e+07	4.52581e+07	4.07543e+07
High	IsMasterProtein	P12956	X-ray repair cross-complementing protein 6 OS=Homo sapiens OX=9606 GN=XRCC6 PE=1 SV=2	0	FALSE	43.557	21	10	25	10	609	69.8	6.64	72.06	10	0	5.74715e+07	6.11934e+07	5.59623e+07
High	IsMasterProtein	O00410	Importin-5 OS=Homo sapiens OX=9606 GN=IPO5 PE=1 SV=4	0	FALSE	43.413	13	10	19	10	1097	123.6	4.94	53.49	10	0	4.08211e+07	3.63851e+07	3.87253e+07
High	IsMasterProtein	Q13085	Acetyl-CoA carboxylase 1 OS=Homo sapiens OX=9606 GN=ACACA PE=1 SV=2	0	FALSE	43.387	5	8	25	8	2346	265.4	6.37	76.42	8	0	5.07453e+07	5.10387e+07	4.37566e+07
High	IsMasterProtein	P60842	Eukaryotic initiation factor 4A-I OS=Homo sapiens OX=9606 GN=EIF4A1 PE=1 SV=1	0	FALSE	43.36	26	10	42	9	406	46.1	5.48	114.98	10	1	1.52052e+08	1.47942e+08	1.37752e+08
High	IsMasterProtein	Q02878	60S ribosomal protein L6 OS=Homo sapiens OX=9606 GN=RPL6 PE=1 SV=3	0	FALSE	43.316	27	7	24	7	288	32.7	10.58	60.72	7	0	6.24711e+07	6.05774e+07	6.22345e+07
High	IsMasterProtein	Q13838	Spliceosome RNA helicase DDX39B OS=Homo sapiens OX=9606 GN=DDX39B PE=1 SV=1	0	FALSE	42.864	25	10	31	10	428	49	5.67	82.24	10	0	7.77007e+07	6.96009e+07	7.06799e+07
High	IsMasterProtein	P46108	Adapter molecule crk OS=Homo sapiens OX=9606 GN=CRK PE=1 SV=2	0	FALSE	42.76	42	9	22	3	304	33.8	5.55	77.43	9	6	6.61638e+07	7.00742e+07	5.83582e+07
High	IsMasterProtein	P62826	GTP-binding nuclear protein Ran OS=Homo sapiens OX=9606 GN=RAN PE=1 SV=3	0	FALSE	42.663	35	8	32	8	216	24.4	7.49	98.57	8	0	1.93405e+08	1.95512e+08	2.13096e+08
High	IsMasterProtein	Q16630	Cleavage and polyadenylation specificity factor subunit 6 OS=Homo sapiens OX=9606 GN=CPSF6 PE=1 SV=2	0	FALSE	42.645	10	3	16	3	551	59.2	7.15	70.08	3	0	3.1834e+07	3.03815e+07	2.85208e+07
High	IsMasterProtein	P61204	ADP-ribosylation factor 3 OS=Homo sapiens OX=9606 GN=ARF3 PE=1 SV=2	0	FALSE	42.381	56	8	27	4	181	20.6	7.43	82.37	8	4	3.82893e+08	3.26015e+08	346174261
High	IsMasterProtein	P62987	Ubiquitin-60S ribosomal protein L40 OS=Homo sapiens OX=9606 GN=UBA52 PE=1 SV=2	0	FALSE	42.293	45	7	47	2	128	14.7	9.83	99.96	7	5	3.73674e+08	3.56889e+08	3.40427e+08
High	IsMasterProtein	P46109	Crk-like protein OS=Homo sapiens OX=9606 GN=CRKL PE=1 SV=1	0	FALSE	41.129	31	7	22	7	303	33.8	6.74	77.46	7	0	5.46389e+07	6.15228e+07	6.22147e+07
High	IsMasterProtein	O95373	Importin-7 OS=Homo sapiens OX=9606 GN=IPO7 PE=1 SV=1	0	FALSE	40.555	12	11	22	11	1038	119.4	4.82	65.82	11	0	4.08245e+07	3.97936e+07	3.66165e+07
High	IsMasterProtein	P13797	Plastin-3 OS=Homo sapiens OX=9606 GN=PLS3 PE=1 SV=4	0	FALSE	40.299	25	12	31	12	630	70.8	5.6	77.02	12	0	4.20631e+07	3.97191e+07	37221977
High	IsMasterProtein	P61313	60S ribosomal protein L15 OS=Homo sapiens OX=9606 GN=RPL15 PE=1 SV=2	0	FALSE	40.069	37	9	36	9	204	24.1	11.62	91.84	9	0	1.0721e+08	1.04097e+08	1.12594e+08
High	IsMasterProtein	P49368	T-complex protein 1 subunit gamma OS=Homo sapiens OX=9606 GN=CCT3 PE=1 SV=4	0	FALSE	39.638	18	7	21	7	545	60.5	6.49	68.73	7	0	6.5763e+07	6.13287e+07	6.13547e+07
High	IsMasterProtein	Q99460	26S proteasome non-ATPase regulatory subunit 1 OS=Homo sapiens OX=9606 GN=PSMD1 PE=1 SV=2	0	FALSE	39.367	17	9	27	9	953	105.8	5.39	81.87	9	0	5.61134e+07	5.16696e+07	4.81656e+07
High	IsMasterProtein	P39023	60S ribosomal protein L3 OS=Homo sapiens OX=9606 GN=RPL3 PE=1 SV=2	0	FALSE	39.148	23	8	22	8	403	46.1	10.18	51.2	8	0	7.65423e+07	7.35554e+07	7.44442e+07
High	IsMasterProtein	P27348	14-3-3 protein theta OS=Homo sapiens OX=9606 GN=YWHAQ PE=1 SV=1	0	FALSE	39.051	36	8	37	4	245	27.7	4.78	87.92	8	0	6.45683e+07	6.04664e+07	5.97769e+07
High	IsMasterProtein	P53999	Activated RNA polymerase II transcriptional coactivator p15 OS=Homo sapiens OX=9606 GN=SUB1 PE=1 SV=3	0	FALSE	38.839	40	8	29	8	127	14.4	9.6	80.67	8	0	2.0076e+08	1.69884e+08	1.63679e+08
High	IsMasterProtein	P61247	40S ribosomal protein S3a OS=Homo sapiens OX=9606 GN=RPS3A PE=1 SV=2	0	FALSE	38.544	31	9	22	9	264	29.9	9.73	61.99	9	0	4.9259e+07	4.78168e+07	4.35143e+07
High	IsMasterProtein	Q9NQ29	Putative RNA-binding protein Luc7-like 1 OS=Homo sapiens OX=9606 GN=LUC7L PE=1 SV=1	0	FALSE	38.524	16	5	28	2	371	43.7	9.92	85.26	5	0	5.31222e+07	4.93022e+07	50182330
High	IsMasterProtein	P06737	Glycogen phosphorylase, liver form OS=Homo sapiens OX=9606 GN=PYGL PE=1 SV=4	0	FALSE	38.431	15	11	27	11	847	97.1	7.17	60.32	11	0	4.92559e+07	4.40127e+07	42628183
High	IsMasterProtein	P50395	Rab GDP dissociation inhibitor beta OS=Homo sapiens OX=9606 GN=GDI2 PE=1 SV=2	0	FALSE	38.096	23	7	18	7	445	50.6	6.47	60.1	7	0	2.31883e+07	2.24792e+07	1.95941e+07
High	IsMasterProtein	P17987	T-complex protein 1 subunit alpha OS=Homo sapiens OX=9606 GN=TCP1 PE=1 SV=1	0	FALSE	38.026	23	10	26	10	556	60.3	6.11	72.47	10	0	4.96506e+07	5.80945e+07	5.65742e+07
High	IsMasterProtein	P27695	DNA-(apurinic or apyrimidinic site) lyase OS=Homo sapiens OX=9606 GN=APEX1 PE=1 SV=2	0	FALSE	37.298	28	7	21	7	318	35.5	8.12	55.03	7	0	4.89064e+07	4.80781e+07	4.76079e+07
High	IsMasterProtein	Q92575	UBX domain-containing protein 4 OS=Homo sapiens OX=9606 GN=UBXN4 PE=1 SV=2	0	FALSE	37.261	21	6	15	6	508	56.7	6.38	48.78	6	0	3.30608e+07	3.28423e+07	3.34664e+07
High	IsMasterProtein	P11021	Endoplasmic reticulum chaperone BiP OS=Homo sapiens OX=9606 GN=HSPA5 PE=1 SV=2	0	FALSE	37.137	15	7	17	5	654	72.3	5.16	56.71	7	0	1.2803e+07	1.3251e+07	1.33561e+07
High	IsMasterProtein	P46108-2	Isoform Crk-I of Adapter molecule crk OS=Homo sapiens OX=9606 GN=CRK	0	FALSE	37.066	55	7	17	1	204	22.9	5.48	65.03	7	0	5.69559e+06	6.4976e+06	5.79838e+06
High	IsMasterProtein	P06744	Glucose-6-phosphate isomerase OS=Homo sapiens OX=9606 GN=GPI PE=1 SV=4	0	FALSE	37.034	20	7	20	7	558	63.1	8.32	55.68	7	0	3.53702e+07	3.71988e+07	33068580
High	IsMasterProtein	P42704	Leucine-rich PPR motif-containing protein, mitochondrial OS=Homo sapiens OX=9606 GN=LRPPRC PE=1 SV=3	0	FALSE	36.918	9	10	15	10	1394	157.8	6.13	38.9	10	0	2.28545e+07	2.16529e+07	1.76157e+07
High	IsMasterProtein	P30101	Protein disulfide-isomerase A3 OS=Homo sapiens OX=9606 GN=PDIA3 PE=1 SV=4	0	FALSE	36.736	24	8	21	8	505	56.7	6.35	70.93	8	0	4.05093e+07	3.59878e+07	3.58455e+07
High	IsMasterProtein	Q13190	Syntaxin-5 OS=Homo sapiens OX=9606 GN=STX5 PE=1 SV=2	0	FALSE	36.729	27	5	12	5	355	39.6	9.16	45.52	5	0	2.50259e+07	2.24174e+07	2.20583e+07
High	IsMasterProtein	P52209	6-phosphogluconate dehydrogenase, decarboxylating OS=Homo sapiens OX=9606 GN=PGD PE=1 SV=3	0	FALSE	36.557	25	8	21	8	483	53.1	7.23	58.63	8	0	3.76385e+07	3.74853e+07	3.82623e+07
High	IsMasterProtein	P14625	Endoplasmin OS=Homo sapiens OX=9606 GN=HSP90B1 PE=1 SV=1	0	FALSE	36.226	16	11	23	10	803	92.4	4.84	50.01	11	0	5.04531e+07	5.0701e+07	45494517
High	IsMasterProtein	P04843	Dolichyl-diphosphooligosaccharide--protein glycosyltransferase subunit 1 OS=Homo sapiens OX=9606 GN=RPN1 PE=1 SV=1	0	FALSE	35.99	19	9	21	9	607	68.5	6.38	70.64	9	0	4.75589e+07	4.78133e+07	4.55926e+07
High	IsMasterProtein	P53618	Coatomer subunit beta OS=Homo sapiens OX=9606 GN=COPB1 PE=1 SV=3	0	FALSE	35.584	10	7	20	7	953	107.1	6.05	66.04	7	0	2.53847e+07	2.291e+07	2.33823e+07
High	IsMasterProtein	P46777	60S ribosomal protein L5 OS=Homo sapiens OX=9606 GN=RPL5 PE=1 SV=3	0	FALSE	35.498	32	9	22	9	297	34.3	9.72	50.91	9	0	8.92233e+07	9.33434e+07	9.55242e+07
High	IsMasterProtein	O15498	Synaptobrevin homolog YKT6 OS=Homo sapiens OX=9606 GN=YKT6 PE=1 SV=1	0	FALSE	34.988	40	6	22	6	198	22.4	6.92	71.11	6	0	8.76989e+07	7.37267e+07	7.86362e+07
High	IsMasterProtein	P09429	High mobility group protein B1 OS=Homo sapiens OX=9606 GN=HMGB1 PE=1 SV=3	0	FALSE	34.601	26	4	20	4	215	24.9	5.74	66.29	4	0	6.30993e+07	6.10504e+07	5.50392e+07
High	IsMasterProtein	Q96AG4	Leucine-rich repeat-containing protein 59 OS=Homo sapiens OX=9606 GN=LRRC59 PE=1 SV=1	0	FALSE	34.365	31	7	20	7	307	34.9	9.57	69.99	7	0	7.17018e+07	6.842e+07	6.44578e+07
High	IsMasterProtein	Q9HB71	Calcyclin-binding protein OS=Homo sapiens OX=9606 GN=CACYBP PE=1 SV=2	0	FALSE	34.225	32	5	19	5	228	26.2	8.25	73.39	5	0	6.95817e+07	6.34249e+07	65896035
High	IsMasterProtein	P50402	Emerin OS=Homo sapiens OX=9606 GN=EMD PE=1 SV=1	0	FALSE	34.006	29	7	20	7	254	29	5.5	56.74	7	0	5.2697e+07	5.05195e+07	47939209
High	IsMasterProtein	Q9P0L0	Vesicle-associated membrane protein-associated protein A OS=Homo sapiens OX=9606 GN=VAPA PE=1 SV=3	0	FALSE	33.819	18	4	23	4	249	27.9	8.62	69.29	4	0	4.79157e+07	4.52603e+07	4.97883e+07
High	IsMasterProtein	P31946	14-3-3 protein beta/alpha OS=Homo sapiens OX=9606 GN=YWHAB PE=1 SV=3	0	FALSE	33.407	32	7	31	3	246	28.1	4.83	74.97	7	0	8.81496e+06	9.18358e+06	9663931
High	IsMasterProtein	Q14247	Src substrate cortactin OS=Homo sapiens OX=9606 GN=CTTN PE=1 SV=2	0	FALSE	33.33	23	8	21	8	550	61.5	5.4	46.86	8	0	3.71348e+07	3.71062e+07	4.06443e+07
High	IsMasterProtein	P22626	Heterogeneous nuclear ribonucleoproteins A2/B1 OS=Homo sapiens OX=9606 GN=HNRNPA2B1 PE=1 SV=2	0	FALSE	32.918	20	7	19	6	353	37.4	8.95	61.21	7	0	2.91846e+07	2.88759e+07	2.86359e+07
High	IsMasterProtein	P35579	Myosin-9 OS=Homo sapiens OX=9606 GN=MYH9 PE=1 SV=4	0	FALSE	32.871	5	9	22	9	1960	226.4	5.6	54.57	9	0	3.28477e+07	2.70952e+07	3.38057e+07
High	IsMasterProtein	P55036	26S proteasome non-ATPase regulatory subunit 4 OS=Homo sapiens OX=9606 GN=PSMD4 PE=1 SV=1	0	FALSE	32.759	25	6	18	6	377	40.7	4.79	58.98	6	0	7.63169e+07	7.34544e+07	6.93665e+07
High	IsMasterProtein	P12277	Creatine kinase B-type OS=Homo sapiens OX=9606 GN=CKB PE=1 SV=1	0	FALSE	32.674	23	6	14	6	381	42.6	5.59	46.13	6	0	4.47795e+07	4.4919e+07	4.16351e+07
High	IsMasterProtein	Q58FF8	Putative heat shock protein HSP 90-beta 2 OS=Homo sapiens OX=9606 GN=HSP90AB2P PE=1 SV=2	0	FALSE	32.504	19	7	34	1	381	44.3	4.84	86.07	7	0	4.3183e+06	3.10635e+06	2.98312e+06
High	IsMasterProtein	P27635	60S ribosomal protein L10 OS=Homo sapiens OX=9606 GN=RPL10 PE=1 SV=4	0	FALSE	32.402	36	8	31	8	214	24.6	10.08	62.09	8	0	9.22902e+07	1.00066e+08	1.05596e+08
High	IsMasterProtein	O43175	D-3-phosphoglycerate dehydrogenase OS=Homo sapiens OX=9606 GN=PHGDH PE=1 SV=4	0	FALSE	32.208	19	8	23	8	533	56.6	6.71	58.74	8	0	5.83972e+07	5.77144e+07	5.26171e+07
High	IsMasterProtein	Q8NC51	Plasminogen activator inhibitor 1 RNA-binding protein OS=Homo sapiens OX=9606 GN=SERBP1 PE=1 SV=2	0	FALSE	31.915	20	7	17	7	408	44.9	8.65	54.61	7	0	1.58509e+07	1.6725e+07	1.83516e+07
High	IsMasterProtein	P51610	Host cell factor 1 OS=Homo sapiens OX=9606 GN=HCFC1 PE=1 SV=2	0	FALSE	31.773	5	8	21	8	2035	208.6	7.46	55.91	8	0	4.69511e+07	3.81921e+07	3.68271e+07
High	IsMasterProtein	P55060	Exportin-2 OS=Homo sapiens OX=9606 GN=CSE1L PE=1 SV=3	0	FALSE	31.413	12	11	24	11	971	110.3	5.77	49.54	11	0	7.39597e+07	6.86469e+07	6.77169e+07
High	IsMasterProtein	P04844	Dolichyl-diphosphooligosaccharide--protein glycosyltransferase subunit 2 OS=Homo sapiens OX=9606 GN=RPN2 PE=1 SV=3	0	FALSE	31.308	14	5	12	5	631	69.2	5.69	46.89	5	0	1.79841e+07	1.64871e+07	1.72651e+07
High	IsMasterProtein	P26368	Splicing factor U2AF 65 kDa subunit OS=Homo sapiens OX=9606 GN=U2AF2 PE=1 SV=4	0	FALSE	31.25	17	6	21	6	475	53.5	9.09	64.47	6	0	4.06597e+07	3.63496e+07	51704957
High	IsMasterProtein	Q15233	Non-POU domain-containing octamer-binding protein OS=Homo sapiens OX=9606 GN=NONO PE=1 SV=4	0	FALSE	30.93	21	9	23	8	471	54.2	8.95	59.67	9	1	1.28995e+08	1.15385e+08	1.12813e+08
High	IsMasterProtein	Q86UE4	Protein LYRIC OS=Homo sapiens OX=9606 GN=MTDH PE=1 SV=2	0	FALSE	30.825	14	6	20	6	582	63.8	9.32	54.87	6	0	2.49077e+07	2.43495e+07	2.41655e+07
High	IsMasterProtein	P84085	ADP-ribosylation factor 5 OS=Homo sapiens OX=9606 GN=ARF5 PE=1 SV=2	0	FALSE	30.803	36	5	24	1	180	20.5	6.79	61.96	5	0	1.56418e+07	1.52603e+07	1.50402e+07
High	IsMasterProtein	P15880	40S ribosomal protein S2 OS=Homo sapiens OX=9606 GN=RPS2 PE=1 SV=2	0	FALSE	30.552	35	10	27	10	293	31.3	10.24	51.82	10	0	8.55448e+07	8.15327e+07	8.35516e+07
High	IsMasterProtein	P23381	Tryptophan--tRNA ligase, cytoplasmic OS=Homo sapiens OX=9606 GN=WARS PE=1 SV=2	0	FALSE	30.111	18	6	17	6	471	53.1	6.23	45.12	6	0	3.01907e+07	2.84218e+07	3.1322e+07
High	IsMasterProtein	P18669	Phosphoglycerate mutase 1 OS=Homo sapiens OX=9606 GN=PGAM1 PE=1 SV=2	0	FALSE	29.715	28	5	9	5	254	28.8	7.18	30.04	5	0	3.61769e+07	3.84222e+07	3.54248e+07
High	IsMasterProtein	P18031	Tyrosine-protein phosphatase non-receptor type 1 OS=Homo sapiens OX=9606 GN=PTPN1 PE=1 SV=1	0	FALSE	29.391	19	6	15	6	435	49.9	6.27	55.39	6	0	2.7228e+07	2.71227e+07	2.65349e+07
High	IsMasterProtein	O00571	ATP-dependent RNA helicase DDX3X OS=Homo sapiens OX=9606 GN=DDX3X PE=1 SV=3	0	FALSE	29.266	12	6	14	6	662	73.2	7.18	45.12	6	0	1.9309e+07	1.96821e+07	1.93206e+07
High	IsMasterProtein	P23526	Adenosylhomocysteinase OS=Homo sapiens OX=9606 GN=AHCY PE=1 SV=4	0	FALSE	29.251	18	7	20	7	432	47.7	6.34	52.55	7	0	4.56928e+07	4.26054e+07	4.16591e+07
High	IsMasterProtein	Q9P258	Protein RCC2 OS=Homo sapiens OX=9606 GN=RCC2 PE=1 SV=2	0	FALSE	29.188	11	4	9	4	522	56	8.78	34.79	4	0	1.48237e+07	1.3741e+07	1.82819e+07
High	IsMasterProtein	P56192	Methionine--tRNA ligase, cytoplasmic OS=Homo sapiens OX=9606 GN=MARS PE=1 SV=2	0	FALSE	29.165	12	7	14	7	900	101.1	6.16	33.08	7	0	2.00984e+07	2.10166e+07	1.86941e+07
High	IsMasterProtein	O95372	Acyl-protein thioesterase 2 OS=Homo sapiens OX=9606 GN=LYPLA2 PE=1 SV=1	0	FALSE	28.986	18	3	15	3	231	24.7	7.23	54.19	3	0	7.06382e+07	6.30894e+07	65696829
High	IsMasterProtein	P05141	ADP/ATP translocase 2 OS=Homo sapiens OX=9606 GN=SLC25A5 PE=1 SV=7	0	FALSE	28.844	27	9	43	3	298	32.8	9.69	86.24	9	6	3.26314e+08	2.89172e+08	302729292
High	IsMasterProtein	Q8TCJ2	Dolichyl-diphosphooligosaccharide--protein glycosyltransferase subunit STT3B OS=Homo sapiens OX=9606 GN=STT3B PE=1 SV=1	0	FALSE	28.739	10	9	25	8	826	93.6	8.91	48.42	9	1	2.54382e+07	2.69068e+07	2.69213e+07
High	IsMasterProtein	P53621	Coatomer subunit alpha OS=Homo sapiens OX=9606 GN=COPA PE=1 SV=2	0	FALSE	28.281	8	9	20	9	1224	138.3	7.66	55.38	9	0	3.0213e+07	2.88853e+07	2.67013e+07
High	IsMasterProtein	P62701	40S ribosomal protein S4, X isoform OS=Homo sapiens OX=9606 GN=RPS4X PE=1 SV=2	0	FALSE	28.037	21	6	15	6	263	29.6	10.15	46.15	6	0	3.71575e+07	3.61338e+07	37231870
High	IsMasterProtein	Q5HYI8	Rab-like protein 3 OS=Homo sapiens OX=9606 GN=RABL3 PE=1 SV=1	0	FALSE	27.687	25	5	17	5	236	26.4	7.11	52.76	5	0	4.17435e+07	4.20364e+07	3.91666e+07
High	IsMasterProtein	P56181-2	Isoform 2 of NADH dehydrogenase [ubiquinone] flavoprotein 3, mitochondrial OS=Homo sapiens OX=9606 GN=NDUFV3	0	FALSE	27.429	19	7	19	7	473	51	9.17	44.95	7	0	3.92809e+07	3.78813e+07	3.72692e+07
High	IsMasterProtein	Q9BTX1	Nucleoporin NDC1 OS=Homo sapiens OX=9606 GN=NDC1 PE=1 SV=2	0	FALSE	27.327	13	6	13	6	674	76.3	9.09	48.05	6	0	2.71228e+07	2.56861e+07	2.35951e+07
High	IsMasterProtein	P50991	T-complex protein 1 subunit delta OS=Homo sapiens OX=9606 GN=CCT4 PE=1 SV=4	0	FALSE	27.296	15	7	15	6	539	57.9	7.83	37.97	7	1	4.20058e+07	4.80838e+07	4.62209e+07
High	IsMasterProtein	Q9H6S0	3'-5' RNA helicase YTHDC2 OS=Homo sapiens OX=9606 GN=YTHDC2 PE=1 SV=2	0	FALSE	26.72	7	9	19	9	1430	160.1	8.4	46.15	9	0	3.0759e+07	3.40687e+07	2.96349e+07
High	IsMasterProtein	P46060	Ran GTPase-activating protein 1 OS=Homo sapiens OX=9606 GN=RANGAP1 PE=1 SV=1	0	FALSE	26.446	15	7	14	7	587	63.5	4.68	37.87	7	0	2.58071e+07	2.25146e+07	2.04711e+07
High	IsMasterProtein	P05023	Sodium/potassium-transporting ATPase subunit alpha-1 OS=Homo sapiens OX=9606 GN=ATP1A1 PE=1 SV=1	0	FALSE	26.376	10	9	20	9	1023	112.8	5.49	46.26	9	0	3.41706e+07	3.25773e+07	3.07275e+07
High	IsMasterProtein	P31948	Stress-induced-phosphoprotein 1 OS=Homo sapiens OX=9606 GN=STIP1 PE=1 SV=1	0	FALSE	26.285	10	4	9	4	543	62.6	6.8	32.65	4	0	1.76822e+07	1.76916e+07	1.68056e+07
High	IsMasterProtein	Q8TEX9	Importin-4 OS=Homo sapiens OX=9606 GN=IPO4 PE=1 SV=2	0	FALSE	26.174	8	5	11	5	1081	118.6	4.96	30.66	5	0	8.23608e+06	7.67044e+06	7.01708e+06
High	IsMasterProtein	P18085	ADP-ribosylation factor 4 OS=Homo sapiens OX=9606 GN=ARF4 PE=1 SV=3	0	FALSE	25.836	30	4	15	1	180	20.5	7.14	58.96	4	0	8.51353e+06	9.70902e+06	6920966
High	IsMasterProtein	Q16531	DNA damage-binding protein 1 OS=Homo sapiens OX=9606 GN=DDB1 PE=1 SV=1	0	FALSE	25.831	9	7	10	7	1140	126.9	5.26	27.64	7	0	1.76927e+07	1.8028e+07	1.68569e+07
High	IsMasterProtein	Q16850	Lanosterol 14-alpha demethylase OS=Homo sapiens OX=9606 GN=CYP51A1 PE=1 SV=3	0	FALSE	25.794	15	4	11	4	503	56.8	8.53	34.91	4	0	5.39213e+06	4.99404e+06	4.79471e+06
High	IsMasterProtein	Q9Y277	Voltage-dependent anion-selective channel protein 3 OS=Homo sapiens OX=9606 GN=VDAC3 PE=1 SV=1	0	FALSE	25.629	25	5	10	5	283	30.6	8.66	37.51	5	0	4.12422e+07	3.64981e+07	4.12124e+07
High	IsMasterProtein	P61981	14-3-3 protein gamma OS=Homo sapiens OX=9606 GN=YWHAG PE=1 SV=2	0	FALSE	25.54	27	5	23	3	247	28.3	4.89	56.27	5	0	8.92384e+06	8.04975e+06	6.83146e+06
High	IsMasterProtein	Q12931	Heat shock protein 75 kDa, mitochondrial OS=Homo sapiens OX=9606 GN=TRAP1 PE=1 SV=3	0	FALSE	25.12	9	5	11	5	704	80.1	8.21	34.94	5	0	1.2744e+08	8.98327e+07	106543513
High	IsMasterProtein	P35658	Nuclear pore complex protein Nup214 OS=Homo sapiens OX=9606 GN=NUP214 PE=1 SV=2	0	FALSE	25.077	4	5	10	5	2090	213.5	7.47	30.05	5	0	3.77627e+07	3.68226e+07	37132444
High	IsMasterProtein	P07737	Profilin-1 OS=Homo sapiens OX=9606 GN=PFN1 PE=1 SV=2	0	FALSE	25.056	55	7	24	7	140	15	8.27	50.74	7	0	5.93502e+07	5.96815e+07	5.80738e+07
High	IsMasterProtein	P32119	Peroxiredoxin-2 OS=Homo sapiens OX=9606 GN=PRDX2 PE=1 SV=5	0	FALSE	24.965	52	6	17	5	198	21.9	5.97	50.22	6	0	2.19023e+07	2.29413e+07	1.81041e+07
High	IsMasterProtein	Q04917	14-3-3 protein eta OS=Homo sapiens OX=9606 GN=YWHAH PE=1 SV=4	0	FALSE	24.916	19	5	18	3	246	28.2	4.84	42.69	5	0	1.21867e+07	1.15915e+07	1.00874e+07
High	IsMasterProtein	Q8WVM8	Sec1 family domain-containing protein 1 OS=Homo sapiens OX=9606 GN=SCFD1 PE=1 SV=4	0	FALSE	24.903	13	5	9	5	642	72.3	6.27	25.91	5	0	1.32771e+07	1.38567e+07	1.42116e+07
High	IsMasterProtein	Q9BQG0	Myb-binding protein 1A OS=Homo sapiens OX=9606 GN=MYBBP1A PE=1 SV=2	0	FALSE	24.606	4	5	13	5	1328	148.8	9.28	41.86	5	0	1.02348e+07	1.00567e+07	1.11715e+07
High	IsMasterProtein	P12236	ADP/ATP translocase 3 OS=Homo sapiens OX=9606 GN=SLC25A6 PE=1 SV=4	0	FALSE	24.57	26	8	39	2	298	32.8	9.74	80.04	8	0	1.05722e+07	1.06195e+07	1.06849e+07
High	IsMasterProtein	P51648	Aldehyde dehydrogenase family 3 member A2 OS=Homo sapiens OX=9606 GN=ALDH3A2 PE=1 SV=1	0	FALSE	24.338	14	6	14	6	485	54.8	7.88	37.8	6	0	3.0181e+07	3.05348e+07	2.81658e+07
High	IsMasterProtein	P18124	60S ribosomal protein L7 OS=Homo sapiens OX=9606 GN=RPL7 PE=1 SV=1	0	FALSE	24.281	29	7	21	7	248	29.2	10.65	60.05	7	0	3.63663e+07	4.02895e+07	3.66734e+07
High	IsMasterProtein	P22087	rRNA 2'-O-methyltransferase fibrillarin OS=Homo sapiens OX=9606 GN=FBL PE=1 SV=2	0	FALSE	24.262	24	6	14	6	321	33.8	10.18	40.46	6	0	3.64233e+07	3.82752e+07	36471737
High	IsMasterProtein	Q99873	Protein arginine N-methyltransferase 1 OS=Homo sapiens OX=9606 GN=PRMT1 PE=1 SV=3	0	FALSE	23.928	26	7	10	7	371	42.4	5.35	30.16	7	0	2.6387e+07	2.52072e+07	2.01843e+07
High	IsMasterProtein	O15042	U2 snRNP-associated SURP motif-containing protein OS=Homo sapiens OX=9606 GN=U2SURP PE=1 SV=2	0	FALSE	23.875	6	5	9	5	1029	118.2	8.47	25.03	5	0	1.26812e+07	1.24475e+07	1.23128e+07
High	IsMasterProtein	P52597	Heterogeneous nuclear ribonucleoprotein F OS=Homo sapiens OX=9606 GN=HNRNPF PE=1 SV=3	0	FALSE	23.432	11	3	12	1	415	45.6	5.58	43.84	3	0	4.56919e+06	3.99717e+06	4.79785e+06
High	IsMasterProtein	Q16777	Histone H2A type 2-C OS=Homo sapiens OX=9606 GN=HIST2H2AC PE=1 SV=4	0	FALSE	23.424	33	4	24	1	129	14	10.9	76.58	4	3	2.30301e+08	2.21817e+08	201969925
High	IsMasterProtein	P53396	ATP-citrate synthase OS=Homo sapiens OX=9606 GN=ACLY PE=1 SV=3	0	FALSE	23.241	7	7	15	7	1101	120.8	7.33	41.16	7	0	2.42893e+07	2.51749e+07	2.27965e+07
High	IsMasterProtein	P29401	Transketolase OS=Homo sapiens OX=9606 GN=TKT PE=1 SV=3	0	FALSE	23.04	13	5	9	5	623	67.8	7.66	31.76	5	0	2.65371e+07	2.60533e+07	2.6217e+07
High	IsMasterProtein	P62280	40S ribosomal protein S11 OS=Homo sapiens OX=9606 GN=RPS11 PE=1 SV=3	0	FALSE	22.966	37	6	16	6	158	18.4	10.3	37.05	6	0	3.69734e+07	3.25578e+07	3.16081e+07
High	IsMasterProtein	P23588	Eukaryotic translation initiation factor 4B OS=Homo sapiens OX=9606 GN=EIF4B PE=1 SV=2	0	FALSE	22.621	11	6	13	6	611	69.1	5.73	43.3	6	0	1.89714e+07	1.7402e+07	1.63884e+07
High	IsMasterProtein	Q8N5K1	CDGSH iron-sulfur domain-containing protein 2 OS=Homo sapiens OX=9606 GN=CISD2 PE=1 SV=1	0	FALSE	22.574	37	4	15	4	135	15.3	9.61	49.78	4	0	2.24277e+07	2.34909e+07	2.21583e+07
High	IsMasterProtein	P63241	Eukaryotic translation initiation factor 5A-1 OS=Homo sapiens OX=9606 GN=EIF5A PE=1 SV=2	0	FALSE	22.448	36	4	13	4	154	16.8	5.24	44.41	4	0	4.01249e+07	3.5759e+07	36436987
High	IsMasterProtein	Q8N4V1	Membrane magnesium transporter 1 OS=Homo sapiens OX=9606 GN=MMGT1 PE=1 SV=1	0	FALSE	22.44	29	3	17	3	131	14.7	9.16	47.84	3	0	5.47333e+07	5.14295e+07	4.73524e+07
High	IsMasterProtein	P10809	60 kDa heat shock protein, mitochondrial OS=Homo sapiens OX=9606 GN=HSPD1 PE=1 SV=2	0	FALSE	22.274	9	2	6	2	573	61	5.87	24.53	2	0	6.78459e+06	6.56076e+06	6114239
High	IsMasterProtein	O76041-2	Isoform 2 of Nebulette OS=Homo sapiens OX=9606 GN=NEBL	0	FALSE	22.156	23	6	16	6	270	31.2	8.31	34.68	6	0	2.82017e+07	2.56801e+07	3.02526e+07
High	IsMasterProtein	Q15366	Poly(rC)-binding protein 2 OS=Homo sapiens OX=9606 GN=PCBP2 PE=1 SV=1	0	FALSE	22.114	18	5	15	4	365	38.6	6.79	42.66	5	1	5.16594e+07	5.05683e+07	4.81579e+07
High	IsMasterProtein	P16615	Sarcoplasmic/endoplasmic reticulum calcium ATPase 2 OS=Homo sapiens OX=9606 GN=ATP2A2 PE=1 SV=1	0	FALSE	21.865	6	6	11	6	1042	114.7	5.34	31.76	6	0	2.27871e+07	2.52165e+07	2.32857e+07
High	IsMasterProtein	P31943	Heterogeneous nuclear ribonucleoprotein H OS=Homo sapiens OX=9606 GN=HNRNPH1 PE=1 SV=4	0	FALSE	21.604	12	4	13	2	449	49.2	6.3	40.8	4	2	1.6206e+07	1.60533e+07	13495356
High	IsMasterProtein	P54136	Arginine--tRNA ligase, cytoplasmic OS=Homo sapiens OX=9606 GN=RARS PE=1 SV=2	0	FALSE	21.19	11	6	9	6	660	75.3	6.68	19.62	6	0	1.88224e+07	1.61182e+07	1.67132e+07
High	IsMasterProtein	P36873	Serine/threonine-protein phosphatase PP1-gamma catalytic subunit OS=Homo sapiens OX=9606 GN=PPP1CC PE=1 SV=1	0	FALSE	21.178	20	4	10	4	323	37	6.54	36.55	4	0	9.83239e+06	1.01726e+07	1.01563e+07
High	IsMasterProtein	Q15631	Translin OS=Homo sapiens OX=9606 GN=TSN PE=1 SV=1	0	FALSE	21.102	33	5	10	5	228	26.2	6.44	32.47	5	0	2.07827e+07	1.60798e+07	1.55173e+07
High	IsMasterProtein	P19338	Nucleolin OS=Homo sapiens OX=9606 GN=NCL PE=1 SV=3	0	FALSE	20.934	11	6	16	6	710	76.6	4.7	39.26	6	0	3.86761e+07	3.71195e+07	3.45726e+07
High	IsMasterProtein	Q9Y5B9	FACT complex subunit SPT16 OS=Homo sapiens OX=9606 GN=SUPT16H PE=1 SV=1	0	FALSE	20.836	7	6	15	6	1047	119.8	5.66	34.56	6	0	1.75768e+07	1.70953e+07	1.68506e+07
High	IsMasterProtein	P49959	Double-strand break repair protein MRE11 OS=Homo sapiens OX=9606 GN=MRE11 PE=1 SV=3	0	FALSE	20.719	10	7	16	7	708	80.5	5.9	41.37	7	0	3.27311e+07	3.25504e+07	3.24277e+07
High	IsMasterProtein	P60174-1	Isoform 2 of Triosephosphate isomerase OS=Homo sapiens OX=9606 GN=TPI1	0	FALSE	20.607	27	5	8	5	249	26.7	6.9	25.1	5	0	8.29934e+06	8.13989e+06	7.41738e+06
High	IsMasterProtein	Q15365	Poly(rC)-binding protein 1 OS=Homo sapiens OX=9606 GN=PCBP1 PE=1 SV=2	0	FALSE	20.458	18	5	12	4	356	37.5	7.09	33.98	5	0	2.35207e+07	2.18787e+07	2.04257e+07
High	IsMasterProtein	Q5JTV8-3	Isoform 3 of Torsin-1A-interacting protein 1 OS=Homo sapiens OX=9606 GN=TOR1AIP1	0	FALSE	20.249	11	5	14	5	584	66.3	8.18	38.03	5	0	2.81269e+07	2.6594e+07	26335539
High	IsMasterProtein	O95433	Activator of 90 kDa heat shock protein ATPase homolog 1 OS=Homo sapiens OX=9606 GN=AHSA1 PE=1 SV=1	0	FALSE	20.166	16	4	8	4	338	38.3	5.53	24.69	4	0	1.603e+07	1.44548e+07	1.53115e+07
High	IsMasterProtein	O00264	Membrane-associated progesterone receptor component 1 OS=Homo sapiens OX=9606 GN=PGRMC1 PE=1 SV=3	0	FALSE	20.151	36	5	16	4	195	21.7	4.7	38.15	5	0	3.38101e+07	3.39531e+07	3.18204e+07
High	IsMasterProtein	Q5QNW6	Histone H2B type 2-F OS=Homo sapiens OX=9606 GN=HIST2H2BF PE=1 SV=3	0	FALSE	20.07	40	5	31	1	126	13.9	10.32	55.16	5	0	2.50923e+07	2.22561e+07	20337962
High	IsMasterProtein	P41250	Glycine--tRNA ligase OS=Homo sapiens OX=9606 GN=GARS1 PE=1 SV=3	0	FALSE	20.002	9	5	8	5	739	83.1	7.03	21.36	5	0	1.08425e+07	1.09483e+07	9.44596e+06
High	IsMasterProtein	Q12905	Interleukin enhancer-binding factor 2 OS=Homo sapiens OX=9606 GN=ILF2 PE=1 SV=2	0	FALSE	19.994	22	5	9	5	390	43	5.26	26.55	5	0	1.19788e+07	1.18776e+07	11886640
High	IsMasterProtein	P40925	Malate dehydrogenase, cytoplasmic OS=Homo sapiens OX=9606 GN=MDH1 PE=1 SV=4	0	FALSE	19.866	20	5	12	5	334	36.4	7.36	30.15	5	0	2.57941e+07	2.77702e+07	19525557
High	IsMasterProtein	Q16778	Histone H2B type 2-E OS=Homo sapiens OX=9606 GN=HIST2H2BE PE=1 SV=3	0	FALSE	19.317	40	5	29	1	126	13.9	10.32	51.69	5	4	4.74843e+08	4.22858e+08	4.93546e+08
High	IsMasterProtein	O15173	Membrane-associated progesterone receptor component 2 OS=Homo sapiens OX=9606 GN=PGRMC2 PE=1 SV=1	0	FALSE	19.221	21	5	25	4	223	23.8	4.88	58.06	5	1	1.80282e+08	1.86041e+08	157537711
High	IsMasterProtein	Q9Y2Z0	Protein SGT1 homolog OS=Homo sapiens OX=9606 GN=SUGT1 PE=1 SV=3	0	FALSE	19.004	20	5	13	5	365	41	5.16	46.38	5	0	1.78952e+07	1.95424e+07	1.92669e+07
High	IsMasterProtein	Q53GQ0	Very-long-chain 3-oxoacyl-CoA reductase OS=Homo sapiens OX=9606 GN=HSD17B12 PE=1 SV=2	0	FALSE	18.889	14	3	9	3	312	34.3	9.32	31.61	3	0	1.42915e+07	1.36965e+07	1.35432e+07
High	IsMasterProtein	Q9Y262	Eukaryotic translation initiation factor 3 subunit L OS=Homo sapiens OX=9606 GN=EIF3L PE=1 SV=1	0	FALSE	18.853	10	4	11	4	564	66.7	6.34	18.68	4	0	7.41027e+06	8.87322e+06	8253653
High	IsMasterProtein	P45880	Voltage-dependent anion-selective channel protein 2 OS=Homo sapiens OX=9606 GN=VDAC2 PE=1 SV=2	0	FALSE	18.795	24	6	16	6	294	31.5	7.56	49.29	6	0	3.32343e+07	2.85877e+07	29613951
High	IsMasterProtein	Q07955	Serine/arginine-rich splicing factor 1 OS=Homo sapiens OX=9606 GN=SRSF1 PE=1 SV=2	0	FALSE	18.664	25	4	9	4	248	27.7	10.36	26.86	4	0	1.45407e+07	1.45387e+07	1.49997e+07
High	IsMasterProtein	P39656	Dolichyl-diphosphooligosaccharide--protein glycosyltransferase 48 kDa subunit OS=Homo sapiens OX=9606 GN=DDOST PE=1 SV=4	0	FALSE	18.565	13	6	14	6	456	50.8	6.55	24.21	6	0	4.61755e+07	4.31665e+07	4.14681e+07
High	IsMasterProtein	Q01081	Splicing factor U2AF 35 kDa subunit OS=Homo sapiens OX=9606 GN=U2AF1 PE=1 SV=3	0	FALSE	18.489	20	4	14	4	240	27.9	8.81	47.79	4	0	4.91598e+07	5.05569e+07	4.30414e+07
High	IsMasterProtein	O95573	Long-chain-fatty-acid--CoA ligase 3 OS=Homo sapiens OX=9606 GN=ACSL3 PE=1 SV=3	0	FALSE	18.422	10	6	12	6	720	80.4	8.38	23.05	6	0	1.32535e+07	1.67888e+07	1.23923e+07
High	IsMasterProtein	Q6Y7W6	GRB10-interacting GYF protein 2 OS=Homo sapiens OX=9606 GN=GIGYF2 PE=1 SV=1	0	FALSE	18.307	5	4	10	4	1299	150	5.54	31.23	4	0	8.3182e+06	7.4103e+06	7.95526e+06
High	IsMasterProtein	P25398	40S ribosomal protein S12 OS=Homo sapiens OX=9606 GN=RPS12 PE=1 SV=3	0	FALSE	18.249	32	4	10	4	132	14.5	7.21	30.5	4	0	2.28614e+07	2.07577e+07	1.98204e+07
High	IsMasterProtein	A0FGR8	Extended synaptotagmin-2 OS=Homo sapiens OX=9606 GN=ESYT2 PE=1 SV=1	0	FALSE	18.145	7	5	10	5	921	102.3	9.26	29.72	5	0	1.56909e+07	1.13204e+07	1.40178e+07
High	IsMasterProtein	Q07960	Rho GTPase-activating protein 1 OS=Homo sapiens OX=9606 GN=ARHGAP1 PE=1 SV=1	0	FALSE	18.117	13	4	9	4	439	50.4	6.29	23.53	4	0	1.49314e+07	1.34773e+07	13612179
High	IsMasterProtein	P08865	40S ribosomal protein SA OS=Homo sapiens OX=9606 GN=RPSA PE=1 SV=4	0	FALSE	18.078	18	4	12	4	295	32.8	4.87	36.7	4	0	1.84675e+07	1.64237e+07	22550283
High	IsMasterProtein	P46977	Dolichyl-diphosphooligosaccharide--protein glycosyltransferase subunit STT3A OS=Homo sapiens OX=9606 GN=STT3A PE=1 SV=2	0	FALSE	17.933	10	7	19	6	705	80.5	8.07	33.79	7	0	3.92159e+07	3.8125e+07	3.77393e+07
High	IsMasterProtein	Q96HY6	DDRGK domain-containing protein 1 OS=Homo sapiens OX=9606 GN=DDRGK1 PE=1 SV=2	0	FALSE	17.874	22	4	6	4	314	35.6	5.12	17.14	4	0	4.03152e+06	4.11359e+06	4.33329e+06
High	IsMasterProtein	Q99615	DnaJ homolog subfamily C member 7 OS=Homo sapiens OX=9606 GN=DNAJC7 PE=1 SV=2	0	FALSE	17.833	7	3	9	3	494	56.4	6.96	27.75	3	0	5.82299e+06	5.30256e+06	3.65922e+06
High	IsMasterProtein	Q15393	Splicing factor 3B subunit 3 OS=Homo sapiens OX=9606 GN=SF3B3 PE=1 SV=4	0	FALSE	17.804	6	5	8	5	1217	135.5	5.26	20.1	5	0	2.55555e+07	2.73991e+07	2.48452e+07
High	IsMasterProtein	P22392-2	Isoform 3 of Nucleoside diphosphate kinase B OS=Homo sapiens OX=9606 GN=NME2	0	FALSE	17.731	33	6	21	2	267	30.1	8.92	45.3	6	4	6.97023e+07	6.7688e+07	65665732
High	IsMasterProtein	Q02543	60S ribosomal protein L18a OS=Homo sapiens OX=9606 GN=RPL18A PE=1 SV=2	0	FALSE	17.548	19	4	13	4	176	20.7	10.71	35.93	4	0	4.31377e+07	4.37779e+07	3.53043e+07
High	IsMasterProtein	O43707	Alpha-actinin-4 OS=Homo sapiens OX=9606 GN=ACTN4 PE=1 SV=2	0	FALSE	17.524	5	4	8	4	911	104.8	5.44	25.71	4	0	9.40552e+06	8.76608e+06	8.97821e+06
High	IsMasterProtein	P51571	Translocon-associated protein subunit delta OS=Homo sapiens OX=9606 GN=SSR4 PE=1 SV=1	0	FALSE	17.321	24	3	11	3	173	19	6.15	31.67	3	0	1.49126e+07	3.37118e+07	1.28145e+07
High	IsMasterProtein	Q9Y617	Phosphoserine aminotransferase OS=Homo sapiens OX=9606 GN=PSAT1 PE=1 SV=2	0	FALSE	17.197	19	6	13	6	370	40.4	7.66	31.02	6	0	2.49727e+07	2.73073e+07	2.69659e+07
High	IsMasterProtein	Q16629	Serine/arginine-rich splicing factor 7 OS=Homo sapiens OX=9606 GN=SRSF7 PE=1 SV=1	0	FALSE	17.188	16	4	8	3	238	27.4	11.82	20.83	4	0	1.10044e+07	1.21844e+07	1.64037e+07
High	IsMasterProtein	P62888	60S ribosomal protein L30 OS=Homo sapiens OX=9606 GN=RPL30 PE=1 SV=2	0	FALSE	17.068	37	4	11	4	115	12.8	9.63	26.3	4	0	3.10023e+07	2.98171e+07	2.759e+07
High	IsMasterProtein	P49720	Proteasome subunit beta type-3 OS=Homo sapiens OX=9606 GN=PSMB3 PE=1 SV=2	0	FALSE	17.016	14	2	7	2	205	22.9	6.55	22.88	2	0	1.07275e+07	1.1128e+07	1.23346e+07
High	IsMasterProtein	P46776	60S ribosomal protein L27a OS=Homo sapiens OX=9606 GN=RPL27A PE=1 SV=2	0	FALSE	16.861	28	4	12	4	148	16.6	11	36.38	4	0	5.84812e+07	6.33353e+07	5.35931e+07
High	IsMasterProtein	P15531	Nucleoside diphosphate kinase A OS=Homo sapiens OX=9606 GN=NME1 PE=1 SV=1	0	FALSE	16.812	35	5	15	1	152	17.1	6.19	37.29	5	0	5.27599e+06	5.54514e+06	6960504
High	IsMasterProtein	B5ME19	Eukaryotic translation initiation factor 3 subunit C-like protein OS=Homo sapiens OX=9606 GN=EIF3CL PE=1 SV=1	0	FALSE	16.663	6	5	9	5	914	105.4	5.64	21.21	5	0	9.97123e+06	1.12153e+07	9.25786e+06
High	IsMasterProtein	P46781	40S ribosomal protein S9 OS=Homo sapiens OX=9606 GN=RPS9 PE=1 SV=3	0	FALSE	16.645	24	6	17	6	194	22.6	10.65	29.93	6	0	4.10658e+07	3.95948e+07	3.61809e+07
High	IsMasterProtein	Q96P70	Importin-9 OS=Homo sapiens OX=9606 GN=IPO9 PE=1 SV=3	0	FALSE	16.141	3	2	7	2	1041	115.9	4.81	20.48	2	0	2.61805e+06	2.3089e+06	1.69828e+06
High	IsMasterProtein	P25205	DNA replication licensing factor MCM3 OS=Homo sapiens OX=9606 GN=MCM3 PE=1 SV=3	0	FALSE	15.877	6	5	7	5	808	90.9	5.77	19.46	5	0	1.04745e+07	1.00797e+07	8.89197e+06
High	IsMasterProtein	P46782	40S ribosomal protein S5 OS=Homo sapiens OX=9606 GN=RPS5 PE=1 SV=4	0	FALSE	15.758	21	4	16	4	204	22.9	9.72	41.7	4	0	5.33534e+07	5.36148e+07	5.21132e+07
High	IsMasterProtein	O75663	TIP41-like protein OS=Homo sapiens OX=9606 GN=TIPRL PE=1 SV=2	0	FALSE	15.71	17	3	7	3	272	31.4	5.91	25.43	3	0	1.27199e+07	1.35224e+07	1.38152e+07
High	IsMasterProtein	P62266	40S ribosomal protein S23 OS=Homo sapiens OX=9606 GN=RPS23 PE=1 SV=3	0	FALSE	15.503	35	3	7	3	143	15.8	10.49	21.53	3	0	2.2779e+07	2.52607e+07	2.22474e+07
High	IsMasterProtein	Q9NWB6	Arginine and glutamate-rich protein 1 OS=Homo sapiens OX=9606 GN=ARGLU1 PE=1 SV=1	0	FALSE	15.498	14	5	21	5	273	33.2	10.35	47.45	5	0	1.36873e+08	1.5007e+08	1.54047e+08
High	IsMasterProtein	P51991	Heterogeneous nuclear ribonucleoprotein A3 OS=Homo sapiens OX=9606 GN=HNRNPA3 PE=1 SV=2	0	FALSE	15.495	15	4	7	3	378	39.6	9.01	22.97	4	0	8.97787e+06	8.40523e+06	8.55939e+06
High	IsMasterProtein	Q96S66	Chloride channel CLIC-like protein 1 OS=Homo sapiens OX=9606 GN=CLCC1 PE=1 SV=1	0	FALSE	15.446	12	5	13	5	551	62	5.55	27.69	5	0	2.27575e+07	2.09727e+07	1.90768e+07
High	IsMasterProtein	P61513	60S ribosomal protein L37a OS=Homo sapiens OX=9606 GN=RPL37A PE=1 SV=2	0	FALSE	15.3	38	3	10	3	92	10.3	10.43	32.45	3	0	2.42705e+07	2.77376e+07	2.79379e+07
High	IsMasterProtein	O95232	Luc7-like protein 3 OS=Homo sapiens OX=9606 GN=LUC7L3 PE=1 SV=2	0	FALSE	15.19	10	4	7	4	432	51.4	9.79	10.96	4	0	1.06168e+07	9.94251e+06	11205548
High	IsMasterProtein	P04181	Ornithine aminotransferase, mitochondrial OS=Homo sapiens OX=9606 GN=OAT PE=1 SV=1	0	FALSE	15.184	8	2	5	2	439	48.5	7.03	19.38	2	0	4.32375e+06	4.41544e+06	4.39569e+06
High	IsMasterProtein	P78371	T-complex protein 1 subunit beta OS=Homo sapiens OX=9606 GN=CCT2 PE=1 SV=4	0	FALSE	15.113	12	4	8	4	535	57.5	6.46	21.9	4	0	1.27515e+07	1.12063e+07	1.05227e+07
High	IsMasterProtein	P62249	40S ribosomal protein S16 OS=Homo sapiens OX=9606 GN=RPS16 PE=1 SV=2	0	FALSE	15.057	44	7	15	7	146	16.4	10.21	25.83	7	0	8.90596e+07	9.08038e+07	88793648
High	IsMasterProtein	P35606	Coatomer subunit beta' OS=Homo sapiens OX=9606 GN=COPB2 PE=1 SV=2	0	FALSE	14.957	7	5	9	5	906	102.4	5.27	18.05	5	0	1.18588e+07	8.96438e+06	1.07637e+07
High	IsMasterProtein	P62244	40S ribosomal protein S15a OS=Homo sapiens OX=9606 GN=RPS15A PE=1 SV=2	0	FALSE	14.866	35	5	11	5	130	14.8	10.13	23.96	5	0	7.02818e+07	7.43087e+07	6.73675e+07
High	IsMasterProtein	Q9HCU5	Prolactin regulatory element-binding protein OS=Homo sapiens OX=9606 GN=PREB PE=1 SV=2	0	FALSE	14.834	13	4	7	4	417	45.4	7.88	20.73	4	0	1.54887e+07	1.51036e+07	13764448
High	IsMasterProtein	Q9UBM7	7-dehydrocholesterol reductase OS=Homo sapiens OX=9606 GN=DHCR7 PE=1 SV=1	0	FALSE	14.815	10	5	11	5	475	54.5	8.7	27.78	5	0	3.78347e+07	3.62881e+07	3.18666e+07
High	IsMasterProtein	Q15637	Splicing factor 1 OS=Homo sapiens OX=9606 GN=SF1 PE=1 SV=4	0	FALSE	14.774	6	3	8	3	639	68.3	8.98	23.19	3	0	2.1495e+07	1.5888e+07	15760787
High	IsMasterProtein	P61619	Protein transport protein Sec61 subunit alpha isoform 1 OS=Homo sapiens OX=9606 GN=SEC61A1 PE=1 SV=2	0	FALSE	14.765	13	4	10	4	476	52.2	8.06	27.48	4	0	3.50101e+07	3.23171e+07	3.01079e+07
High	IsMasterProtein	P51149	Ras-related protein Rab-7a OS=Homo sapiens OX=9606 GN=RAB7A PE=1 SV=1	0	FALSE	14.736	22	4	8	4	207	23.5	6.7	20.93	4	0	1.48736e+07	1.50838e+07	1.72399e+07
High	IsMasterProtein	Q9H9B4	Sideroflexin-1 OS=Homo sapiens OX=9606 GN=SFXN1 PE=1 SV=4	0	FALSE	14.73	17	5	11	5	322	35.6	9.07	28.86	5	0	1.65181e+07	1.4367e+07	1.70439e+07
High	IsMasterProtein	P35232	Prohibitin OS=Homo sapiens OX=9606 GN=PHB PE=1 SV=1	0	FALSE	14.597	16	4	7	4	272	29.8	5.76	18.91	4	0	9.82266e+06	1.39746e+07	1.29425e+07
High	IsMasterProtein	Q01130	Serine/arginine-rich splicing factor 2 OS=Homo sapiens OX=9606 GN=SRSF2 PE=1 SV=4	0	FALSE	14.583	12	3	11	3	221	25.5	11.85	30.58	3	0	1.58142e+07	1.39465e+07	18169530
High	IsMasterProtein	P62851	40S ribosomal protein S25 OS=Homo sapiens OX=9606 GN=RPS25 PE=1 SV=1	0	FALSE	14.562	30	5	20	5	125	13.7	10.11	43.59	5	0	1.19881e+08	1.1212e+08	1.12861e+08
High	IsMasterProtein	P08243	Asparagine synthetase [glutamine-hydrolyzing] OS=Homo sapiens OX=9606 GN=ASNS PE=1 SV=4	0	FALSE	14.381	8	3	8	3	561	64.3	6.86	26.32	3	0	1.236e+07	1.1361e+07	1.0486e+07
High	IsMasterProtein	Q9BZF1	Oxysterol-binding protein-related protein 8 OS=Homo sapiens OX=9606 GN=OSBPL8 PE=1 SV=3	0	FALSE	14.296	7	5	12	5	889	101.1	6.96	32.75	5	0	1.4958e+07	1.42677e+07	1.26656e+07
High	IsMasterProtein	P38919	Eukaryotic initiation factor 4A-III OS=Homo sapiens OX=9606 GN=EIF4A3 PE=1 SV=4	0	FALSE	14.228	14	5	13	4	411	46.8	6.73	35.75	5	0	1.69677e+07	1.4993e+07	1.52725e+07
High	IsMasterProtein	P54577	Tyrosine--tRNA ligase, cytoplasmic OS=Homo sapiens OX=9606 GN=YARS PE=1 SV=4	0	FALSE	14.205	10	6	12	6	528	59.1	7.05	22.41	6	0	1.89062e+07	1.85605e+07	1.90429e+07
High	IsMasterProtein	P62910	60S ribosomal protein L32 OS=Homo sapiens OX=9606 GN=RPL32 PE=1 SV=2	0	FALSE	14.133	22	3	8	3	135	15.9	11.33	24.62	3	0	2.53955e+07	2.30866e+07	2.02876e+07
High	IsMasterProtein	O95721	Synaptosomal-associated protein 29 OS=Homo sapiens OX=9606 GN=SNAP29 PE=1 SV=1	0	FALSE	13.964	20	4	8	4	258	29	5.81	21.7	4	0	1.53502e+07	1.54793e+07	1.60195e+07
High	IsMasterProtein	Q14318	Peptidyl-prolyl cis-trans isomerase FKBP8 OS=Homo sapiens OX=9606 GN=FKBP8 PE=1 SV=2	0	FALSE	13.954	10	3	11	3	412	44.5	4.84	39.44	3	0	1.75813e+07	1.76952e+07	15040988
High	IsMasterProtein	Q07020	60S ribosomal protein L18 OS=Homo sapiens OX=9606 GN=RPL18 PE=1 SV=2	0	FALSE	13.916	26	4	14	4	188	21.6	11.72	40.81	4	0	3.6377e+07	3.27558e+07	3.19407e+07
High	IsMasterProtein	P61163	Alpha-centractin OS=Homo sapiens OX=9606 GN=ACTR1A PE=1 SV=1	0	FALSE	13.834	12	3	6	3	376	42.6	6.64	15.6	3	0	7.86996e+06	8.58047e+06	7.99299e+06
High	IsMasterProtein	P26639	Threonine--tRNA ligase 1, cytoplasmic OS=Homo sapiens OX=9606 GN=TARS1 PE=1 SV=3	0	FALSE	13.736	5	4	10	4	723	83.4	6.67	25.47	4	0	1.4975e+07	1.35167e+07	1.38063e+07
High	IsMasterProtein	Q9NZC7	WW domain-containing oxidoreductase OS=Homo sapiens OX=9606 GN=WWOX PE=1 SV=1	0	FALSE	13.696	9	3	8	3	414	46.6	7.17	25.13	3	0	1.70639e+07	1.70545e+07	1.64438e+07
High	IsMasterProtein	Q9H3N1	Thioredoxin-related transmembrane protein 1 OS=Homo sapiens OX=9606 GN=TMX1 PE=1 SV=1	0	FALSE	13.668	15	4	11	4	280	31.8	4.98	27.55	4	0	2.35518e+07	2.38937e+07	1.48732e+07
High	IsMasterProtein	Q02790	Peptidyl-prolyl cis-trans isomerase FKBP4 OS=Homo sapiens OX=9606 GN=FKBP4 PE=1 SV=3	0	FALSE	13.467	8	3	6	3	459	51.8	5.43	21.21	3	0	1.09451e+07	1.01425e+07	1.2107e+07
High	IsMasterProtein	Q14204	Cytoplasmic dynein 1 heavy chain 1 OS=Homo sapiens OX=9606 GN=DYNC1H1 PE=1 SV=5	0	FALSE	13.403	1	5	11	5	4646	532.1	6.4	24.45	5	0	9.19172e+06	9.20072e+06	9.02223e+06
High	IsMasterProtein	Q9Y679	Ancient ubiquitous protein 1 OS=Homo sapiens OX=9606 GN=AUP1 PE=1 SV=2	0	FALSE	13.4	13	4	10	4	410	45.8	8.65	22.92	4	0	1.90269e+07	1.87104e+07	2.05136e+07
High	IsMasterProtein	Q86VP6	Cullin-associated NEDD8-dissociated protein 1 OS=Homo sapiens OX=9606 GN=CAND1 PE=1 SV=2	0	FALSE	13.348	3	3	7	3	1230	136.3	5.78	20.81	3	0	8.10327e+06	7.6737e+06	8.23123e+06
High	IsMasterProtein	Q9H089	Large subunit GTPase 1 homolog OS=Homo sapiens OX=9606 GN=LSG1 PE=1 SV=2	0	FALSE	13.313	8	6	11	6	658	75.2	6.38	24.39	6	0	1.52001e+07	1.36939e+07	1.55694e+07
High	IsMasterProtein	Q96QV6	Histone H2A type 1-A OS=Homo sapiens OX=9606 GN=HIST1H2AA PE=1 SV=3	0	FALSE	13.284	35	4	15	1	131	14.2	10.86	28.88	4	0	914377	767220	764471
High	IsMasterProtein	P48643	T-complex protein 1 subunit epsilon OS=Homo sapiens OX=9606 GN=CCT5 PE=1 SV=1	0	FALSE	13.253	6	3	4	2	541	59.6	5.66	8.62	3	0	1.29989e+07	1.13919e+07	1.20305e+07
High	IsMasterProtein	P61326	Protein mago nashi homolog OS=Homo sapiens OX=9606 GN=MAGOH PE=1 SV=1	0	FALSE	13.179	33	4	5	4	146	17.2	6.11	14.23	4	0	1.16716e+07	1.13016e+07	1.15983e+07
High	IsMasterProtein	P06493	Cyclin-dependent kinase 1 OS=Homo sapiens OX=9606 GN=CDK1 PE=1 SV=3	0	FALSE	13.113	16	5	10	5	297	34.1	8.4	18.74	5	0	2.75672e+07	2.41659e+07	2.38988e+07
High	IsMasterProtein	Q00325-2	Isoform B of Phosphate carrier protein, mitochondrial OS=Homo sapiens OX=9606 GN=SLC25A3	0	FALSE	13.029	14	4	10	4	361	39.9	9.36	26.17	4	0	1.95007e+07	1.81225e+07	1.77024e+07
High	IsMasterProtein	P48739	Phosphatidylinositol transfer protein beta isoform OS=Homo sapiens OX=9606 GN=PITPNB PE=1 SV=2	0	FALSE	13.018	24	4	10	4	271	31.5	6.87	22.91	4	0	2.28305e+07	2.45915e+07	2.1821e+07
High	IsMasterProtein	P60891	Ribose-phosphate pyrophosphokinase 1 OS=Homo sapiens OX=9606 GN=PRPS1 PE=1 SV=2	0	FALSE	12.982	15	5	12	5	318	34.8	6.98	29.52	5	0	2.41513e+07	2.22711e+07	2.37955e+07
High	IsMasterProtein	P24539	ATP synthase F(0) complex subunit B1, mitochondrial OS=Homo sapiens OX=9606 GN=ATP5PB PE=1 SV=2	0	FALSE	12.976	11	2	7	2	256	28.9	9.36	23.46	2	0	1.09394e+07	8.99273e+06	1.09418e+07
High	IsMasterProtein	Q9NR31	GTP-binding protein SAR1a OS=Homo sapiens OX=9606 GN=SAR1A PE=1 SV=1	0	FALSE	12.837	16	2	8	2	198	22.4	6.68	22.22	2	0	8.84793e+06	9.08445e+06	8.53002e+06
High	IsMasterProtein	Q13162	Peroxiredoxin-4 OS=Homo sapiens OX=9606 GN=PRDX4 PE=1 SV=1	0	FALSE	12.819	16	3	7	2	271	30.5	6.29	14.45	3	0	6.21116e+06	6.3967e+06	6081328
High	IsMasterProtein	Q6NXT4	Zinc transporter 6 OS=Homo sapiens OX=9606 GN=SLC30A6 PE=1 SV=2	0	FALSE	12.634	7	2	5	2	461	51.1	9.16	7.94	2	0	1.13024e+06	839078	1.00146e+06
High	IsMasterProtein	P08195	4F2 cell-surface antigen heavy chain OS=Homo sapiens OX=9606 GN=SLC3A2 PE=1 SV=3	0	FALSE	12.605	7	3	6	3	630	68	5.01	16.81	3	0	7.64031e+06	6.67917e+06	7140755
High	IsMasterProtein	Q15758	Neutral amino acid transporter B(0) OS=Homo sapiens OX=9606 GN=SLC1A5 PE=1 SV=2	0	FALSE	12.563	5	2	5	2	541	56.6	5.48	19.59	2	0	8.19693e+06	7.89344e+06	8.25231e+06
High	IsMasterProtein	P62854	40S ribosomal protein S26 OS=Homo sapiens OX=9606 GN=RPS26 PE=1 SV=3	0	FALSE	12.547	29	4	11	4	115	13	11	29.27	4	0	4.19799e+07	3.89003e+07	3.77627e+07
High	IsMasterProtein	P41091	Eukaryotic translation initiation factor 2 subunit 3 OS=Homo sapiens OX=9606 GN=EIF2S3 PE=1 SV=3	0	FALSE	12.501	10	4	10	4	472	51.1	8.4	19.71	4	0	1.08285e+07	1.03234e+07	9.07396e+06
High	IsMasterProtein	P62277	40S ribosomal protein S13 OS=Homo sapiens OX=9606 GN=RPS13 PE=1 SV=2	0	FALSE	12.482	30	4	8	4	151	17.2	10.54	20	4	0	2.88382e+07	2.70516e+07	2.56343e+07
High	IsMasterProtein	O75844	CAAX prenyl protease 1 homolog OS=Homo sapiens OX=9606 GN=ZMPSTE24 PE=1 SV=2	0	FALSE	12.463	7	4	9	4	475	54.8	7.49	14.63	4	0	1.54472e+07	1.58642e+07	1.54586e+07
High	IsMasterProtein	Q15185	Prostaglandin E synthase 3 OS=Homo sapiens OX=9606 GN=PTGES3 PE=1 SV=1	0	FALSE	12.391	23	3	9	3	160	18.7	4.54	25.84	3	0	2.40429e+07	2.2134e+07	1.88332e+07
High	IsMasterProtein	P33993	DNA replication licensing factor MCM7 OS=Homo sapiens OX=9606 GN=MCM7 PE=1 SV=4	0	FALSE	12.379	8	4	5	4	719	81.3	6.46	13.26	4	0	9.52017e+06	1.02802e+07	1.05347e+07
High	IsMasterProtein	Q9BVC6	Transmembrane protein 109 OS=Homo sapiens OX=9606 GN=TMEM109 PE=1 SV=1	0	FALSE	12.323	9	3	8	3	243	26.2	10.48	23.82	3	0	2.4664e+07	2.40604e+07	23582236
High	IsMasterProtein	Q9UQ35	Serine/arginine repetitive matrix protein 2 OS=Homo sapiens OX=9606 GN=SRRM2 PE=1 SV=2	0	FALSE	12.278	3	4	7	4	2752	299.4	12.06	25.33	4	0	1.80101e+07	1.61002e+07	17790464
High	IsMasterProtein	O14641	Segment polarity protein dishevelled homolog DVL-2 OS=Homo sapiens OX=9606 GN=DVL2 PE=1 SV=1	0	FALSE	12.208	5	4	9	3	736	78.9	6.02	16.43	4	1	1.43596e+07	1.4839e+07	1.51503e+07
High	IsMasterProtein	P25685	DnaJ homolog subfamily B member 1 OS=Homo sapiens OX=9606 GN=DNAJB1 PE=1 SV=4	0	FALSE	12.191	9	3	6	3	340	38	8.63	18.95	3	0	8.50323e+06	7.95288e+06	9365037
High	IsMasterProtein	Q92973	Transportin-1 OS=Homo sapiens OX=9606 GN=TNPO1 PE=1 SV=2	0	FALSE	12.109	6	4	6	4	898	102.3	4.98	9.22	4	0	9.26945e+06	9.94026e+06	8.57438e+06
High	IsMasterProtein	P26583	High mobility group protein B2 OS=Homo sapiens OX=9606 GN=HMGB2 PE=1 SV=2	0	FALSE	11.955	14	2	6	2	209	24	7.81	21.28	2	0	1.38765e+07	1.55278e+07	1.31941e+07
High	IsMasterProtein	Q96QK1	Vacuolar protein sorting-associated protein 35 OS=Homo sapiens OX=9606 GN=VPS35 PE=1 SV=2	0	FALSE	11.921	4	3	7	3	796	91.6	5.49	18.45	3	0	6.63219e+06	6.70168e+06	5.84374e+06
High	IsMasterProtein	P13667	Protein disulfide-isomerase A4 OS=Homo sapiens OX=9606 GN=PDIA4 PE=1 SV=2	0	FALSE	11.879	6	4	13	4	645	72.9	5.07	23.06	4	0	1.44435e+07	1.34679e+07	1.31578e+07
High	IsMasterProtein	P61081	NEDD8-conjugating enzyme Ubc12 OS=Homo sapiens OX=9606 GN=UBE2M PE=1 SV=1	0	FALSE	11.868	27	5	12	5	183	20.9	7.69	20.89	5	0	1.42496e+07	1.36643e+07	1.49051e+07
High	IsMasterProtein	Q15084	Protein disulfide-isomerase A6 OS=Homo sapiens OX=9606 GN=PDIA6 PE=1 SV=1	0	FALSE	11.856	9	2	4	2	440	48.1	5.08	9.14	2	0	6.39761e+06	6.87176e+06	6.47517e+06
High	IsMasterProtein	P55209	Nucleosome assembly protein 1-like 1 OS=Homo sapiens OX=9606 GN=NAP1L1 PE=1 SV=1	0	FALSE	11.844	8	3	5	3	391	45.3	4.46	12.51	3	0	1.51188e+07	1.31287e+07	1.25455e+07
High	IsMasterProtein	Q12906	Interleukin enhancer-binding factor 3 OS=Homo sapiens OX=9606 GN=ILF3 PE=1 SV=3	0	FALSE	11.798	4	3	7	3	894	95.3	8.76	19.15	3	0	1.56391e+07	1.608e+07	1.54585e+07
High	IsMasterProtein	O14980	Exportin-1 OS=Homo sapiens OX=9606 GN=XPO1 PE=1 SV=1	0	FALSE	11.627	4	4	9	4	1071	123.3	6.06	20.21	4	0	9.50466e+06	1.52652e+07	9.95262e+06
High	IsMasterProtein	Q9Y394	Dehydrogenase/reductase SDR family member 7 OS=Homo sapiens OX=9606 GN=DHRS7 PE=1 SV=1	0	FALSE	11.624	18	4	6	4	339	38.3	8.32	15.92	4	0	1.31504e+07	1.17646e+07	1.11285e+07
High	IsMasterProtein	Q66PJ3	ADP-ribosylation factor-like protein 6-interacting protein 4 OS=Homo sapiens OX=9606 GN=ARL6IP4 PE=1 SV=2	0	FALSE	11.542	7	2	5	2	421	44.9	10.93	19	2	0	8.72326e+06	7.34081e+06	7253912
High	IsMasterProtein	P59998	Actin-related protein 2/3 complex subunit 4 OS=Homo sapiens OX=9606 GN=ARPC4 PE=1 SV=3	0	FALSE	11.487	23	4	9	4	168	19.7	8.43	24.14	4	0	1.68681e+07	1.69253e+07	1.58803e+07
High	IsMasterProtein	Q9P035	Very-long-chain (3R)-3-hydroxyacyl-CoA dehydratase 3 OS=Homo sapiens OX=9606 GN=HACD3 PE=1 SV=2	0	FALSE	11.452	10	3	12	3	362	43.1	8.94	36.45	3	0	2.31758e+07	2.35244e+07	2.55001e+07
High	IsMasterProtein	P34897	Serine hydroxymethyltransferase, mitochondrial OS=Homo sapiens OX=9606 GN=SHMT2 PE=1 SV=3	0	FALSE	11.411	8	4	10	4	504	56	8.53	26.52	4	0	3.35554e+07	2.9934e+07	3.3051e+07
High	IsMasterProtein	P41252	Isoleucine--tRNA ligase, cytoplasmic OS=Homo sapiens OX=9606 GN=IARS PE=1 SV=2	0	FALSE	11.356	4	4	7	4	1262	144.4	6.15	16.62	4	0	1.19261e+07	1.04103e+07	1.01569e+07
High	IsMasterProtein	P52272	Heterogeneous nuclear ribonucleoprotein M OS=Homo sapiens OX=9606 GN=HNRNPM PE=1 SV=3	0	FALSE	11.334	4	2	5	2	730	77.5	8.7	22.58	2	0	3.78799e+06	5.36253e+06	4.48443e+06
High	IsMasterProtein	Q15008	26S proteasome non-ATPase regulatory subunit 6 OS=Homo sapiens OX=9606 GN=PSMD6 PE=1 SV=1	0	FALSE	11.238	9	3	5	3	389	45.5	5.62	14.98	3	0	8.41235e+06	8.79198e+06	9.45551e+06
High	IsMasterProtein	P40926	Malate dehydrogenase, mitochondrial OS=Homo sapiens OX=9606 GN=MDH2 PE=1 SV=3	0	FALSE	11.179	15	4	7	4	338	35.5	8.68	15.85	4	0	9.79434e+06	8.85467e+06	8.44626e+06
High	IsMasterProtein	Q99832	T-complex protein 1 subunit eta OS=Homo sapiens OX=9606 GN=CCT7 PE=1 SV=2	0	FALSE	11.11	7	3	7	3	543	59.3	7.65	22.71	3	0	1.65984e+07	1.55238e+07	16280164
High	IsMasterProtein	P55786	Puromycin-sensitive aminopeptidase OS=Homo sapiens OX=9606 GN=NPEPPS PE=1 SV=2	0	FALSE	11.071	5	4	11	4	919	103.2	5.72	24.06	4	0	1.20803e+07	1.10755e+07	1.16914e+07
High	IsMasterProtein	P37837	Transaldolase OS=Homo sapiens OX=9606 GN=TALDO1 PE=1 SV=2	0	FALSE	11.067	11	4	10	4	337	37.5	6.81	21.83	4	0	1.87793e+07	1.88079e+07	1.72981e+07
High	IsMasterProtein	P14868	Aspartate--tRNA ligase, cytoplasmic OS=Homo sapiens OX=9606 GN=DARS PE=1 SV=2	0	FALSE	10.991	12	5	8	5	501	57.1	6.55	13.16	5	0	1.77301e+07	1.67935e+07	2.80591e+07
High	IsMasterProtein	P62906	60S ribosomal protein L10a OS=Homo sapiens OX=9606 GN=RPL10A PE=1 SV=2	0	FALSE	10.986	13	3	6	3	217	24.8	9.94	10.87	3	0	3.08673e+07	2.93582e+07	2.8718e+07
High	IsMasterProtein	P60953	Cell division control protein 42 homolog OS=Homo sapiens OX=9606 GN=CDC42 PE=1 SV=2	0	FALSE	10.943	20	3	5	2	191	21.2	6.55	11.74	3	0	4.63328e+06	4.41117e+06	4.22276e+06
High	IsMasterProtein	Q96CS3	FAS-associated factor 2 OS=Homo sapiens OX=9606 GN=FAF2 PE=1 SV=2	0	FALSE	10.917	7	2	4	2	445	52.6	5.62	14	2	0	4.26652e+06	5.08757e+06	4.46037e+06
High	IsMasterProtein	P62820	Ras-related protein Rab-1A OS=Homo sapiens OX=9606 GN=RAB1A PE=1 SV=3	0	FALSE	10.907	19	3	6	2	205	22.7	6.21	17.11	3	1	2.83346e+07	2.79749e+07	2.64381e+07
High	IsMasterProtein	Q5T8P6	RNA-binding protein 26 OS=Homo sapiens OX=9606 GN=RBM26 PE=1 SV=3	0	FALSE	10.883	4	3	4	3	1007	113.5	9.16	12.03	3	0	7.67333e+06	6.31292e+06	8.14711e+06
High	IsMasterProtein	Q8TA86	Retinitis pigmentosa 9 protein OS=Homo sapiens OX=9606 GN=RP9 PE=1 SV=2	0	FALSE	10.882	8	3	6	3	221	26.1	9.79	12.32	3	0	9.30171e+06	9.49167e+06	9.19558e+06
High	IsMasterProtein	Q9Y266	Nuclear migration protein nudC OS=Homo sapiens OX=9606 GN=NUDC PE=1 SV=1	0	FALSE	10.686	13	3	5	3	331	38.2	5.38	12.14	3	0	1.19853e+07	3.06859e+06	6.56565e+06
High	IsMasterProtein	O75494	Serine/arginine-rich splicing factor 10 OS=Homo sapiens OX=9606 GN=SRSF10 PE=1 SV=1	0	FALSE	10.674	9	2	7	2	262	31.3	11.27	23.86	2	0	1.6608e+07	1.81997e+07	1.64449e+07
High	IsMasterProtein	P51572	B-cell receptor-associated protein 31 OS=Homo sapiens OX=9606 GN=BCAP31 PE=1 SV=3	0	FALSE	10.653	14	4	12	4	246	28	8.44	27.33	4	0	3.59956e+07	3.90635e+07	4.05386e+07
High	IsMasterProtein	O43242	26S proteasome non-ATPase regulatory subunit 3 OS=Homo sapiens OX=9606 GN=PSMD3 PE=1 SV=2	0	FALSE	10.627	7	3	4	3	534	60.9	8.44	12.66	3	0	7.66838e+06	7.90334e+06	6.88854e+06
High	IsMasterProtein	Q9NZ43	Vesicle transport protein USE1 OS=Homo sapiens OX=9606 GN=USE1 PE=1 SV=2	0	FALSE	10.587	9	2	10	2	259	29.4	9.07	28.41	2	0	9.28193e+06	9.87847e+06	10174014
High	IsMasterProtein	P18621	60S ribosomal protein L17 OS=Homo sapiens OX=9606 GN=RPL17 PE=1 SV=3	0	FALSE	10.567	21	3	6	3	184	21.4	10.17	19.3	3	0	8.68566e+06	9.04842e+06	7.95144e+06
High	IsMasterProtein	P06748	Nucleophosmin OS=Homo sapiens OX=9606 GN=NPM1 PE=1 SV=2	0	FALSE	10.534	9	2	6	2	294	32.6	4.78	23.24	2	0	3.65539e+07	3.97618e+07	33226218
High	IsMasterProtein	O14979	Heterogeneous nuclear ribonucleoprotein D-like OS=Homo sapiens OX=9606 GN=HNRNPDL PE=1 SV=3	0	FALSE	10.52	6	2	7	2	420	46.4	9.57	20.67	2	0	1.78254e+07	1.82004e+07	1.81912e+07
High	IsMasterProtein	P61077	Ubiquitin-conjugating enzyme E2 D3 OS=Homo sapiens OX=9606 GN=UBE2D3 PE=1 SV=1	0	FALSE	10.468	28	3	7	3	147	16.7	7.8	19.14	3	0	2.62038e+07	2.52003e+07	2.55814e+07
High	IsMasterProtein	O75390	Citrate synthase, mitochondrial OS=Homo sapiens OX=9606 GN=CS PE=1 SV=2	0	FALSE	10.387	9	4	7	4	466	51.7	8.32	13.23	4	0	1.2908e+07	1.24924e+07	11531045
High	IsMasterProtein	Q9Y4P3	Transducin beta-like protein 2 OS=Homo sapiens OX=9606 GN=TBL2 PE=1 SV=1	0	FALSE	10.381	7	3	7	3	447	49.8	9.44	8.86	3	0	8.7131e+06	6.43584e+06	8.02697e+06
High	IsMasterProtein	P40227	T-complex protein 1 subunit zeta OS=Homo sapiens OX=9606 GN=CCT6A PE=1 SV=3	0	FALSE	10.339	5	2	5	2	531	58	6.68	15.76	2	0	4.26954e+06	4.6355e+06	3.68089e+06
High	IsMasterProtein	P62913	60S ribosomal protein L11 OS=Homo sapiens OX=9606 GN=RPL11 PE=1 SV=2	0	FALSE	10.323	17	3	7	3	178	20.2	9.6	18.8	3	0	2.2235e+07	2.21414e+07	2.14205e+07
High	IsMasterProtein	Q6PKG0	La-related protein 1 OS=Homo sapiens OX=9606 GN=LARP1 PE=1 SV=2	0	FALSE	10.262	4	3	4	3	1096	123.4	8.82	7.75	3	0	1.95822e+06	2.1546e+06	1.24621e+06
High	IsMasterProtein	P10768	S-formylglutathione hydrolase OS=Homo sapiens OX=9606 GN=ESD PE=1 SV=2	0	FALSE	10.159	15	3	6	3	282	31.4	7.02	15.21	3	0	9.24398e+06	8.10226e+06	7.60272e+06
High	IsMasterProtein	P23284	Peptidyl-prolyl cis-trans isomerase B OS=Homo sapiens OX=9606 GN=PPIB PE=1 SV=2	0	FALSE	10.146	15	4	12	3	216	23.7	9.41	26.14	4	1	6.21577e+07	5.27928e+07	67024332
High	IsMasterProtein	P23921	Ribonucleoside-diphosphate reductase large subunit OS=Homo sapiens OX=9606 GN=RRM1 PE=1 SV=1	0	FALSE	10.143	5	3	7	3	792	90	7.15	19.02	3	0	6.81963e+06	6.65297e+06	6.0946e+06
High	IsMasterProtein	Q6P2Q9	Pre-mRNA-processing-splicing factor 8 OS=Homo sapiens OX=9606 GN=PRPF8 PE=1 SV=2	0	FALSE	10.139	2	5	9	5	2335	273.4	8.84	17.78	5	0	1.34508e+07	1.22117e+07	1.26791e+07
High	IsMasterProtein	Q9Y2X3	Nucleolar protein 58 OS=Homo sapiens OX=9606 GN=NOP58 PE=1 SV=1	0	FALSE	9.935	6	3	7	3	529	59.5	8.92	19	3	0	8.19122e+06	8.39564e+06	8.49784e+06
High	IsMasterProtein	P46783	40S ribosomal protein S10 OS=Homo sapiens OX=9606 GN=RPS10 PE=1 SV=1	0	FALSE	9.933	12	2	9	2	165	18.9	10.15	21.72	2	0	7.45864e+06	6.46783e+06	6.87665e+06
High	IsMasterProtein	O43143	Pre-mRNA-splicing factor ATP-dependent RNA helicase DHX15 OS=Homo sapiens OX=9606 GN=DHX15 PE=1 SV=2	0	FALSE	9.928	6	4	7	4	795	90.9	7.46	13.79	4	0	1.08259e+07	1.07798e+07	9.76927e+06
High	IsMasterProtein	P49643	DNA primase large subunit OS=Homo sapiens OX=9606 GN=PRIM2 PE=1 SV=2	0	FALSE	9.922	4	2	4	2	509	58.8	7.91	10.51	2	0	1.37104e+06	1.56308e+06	1.46865e+06
High	IsMasterProtein	Q9Y6I9	Testis-expressed protein 264 OS=Homo sapiens OX=9606 GN=TEX264 PE=1 SV=1	0	FALSE	9.916	8	2	6	2	313	34.2	4.86	15.93	2	0	6.41786e+06	6.05699e+06	6.31617e+06
High	IsMasterProtein	Q9H4A4	Aminopeptidase B OS=Homo sapiens OX=9606 GN=RNPEP PE=1 SV=2	0	FALSE	9.901	5	3	6	3	650	72.5	5.74	15.95	3	0	1.07391e+07	6.13271e+06	9.31395e+06
High	IsMasterProtein	P49189	4-trimethylaminobutyraldehyde dehydrogenase OS=Homo sapiens OX=9606 GN=ALDH9A1 PE=1 SV=3	0	FALSE	9.845	8	4	8	4	494	53.8	5.87	16.28	4	0	1.63391e+07	1.56284e+07	1.52671e+07
High	IsMasterProtein	Q9NSD9	Phenylalanine--tRNA ligase beta subunit OS=Homo sapiens OX=9606 GN=FARSB PE=1 SV=3	0	FALSE	9.828	6	3	5	3	589	66.1	6.84	6.44	3	0	1.10812e+07	9.32393e+06	10036699
High	IsMasterProtein	Q9P2J5	Leucine--tRNA ligase, cytoplasmic OS=Homo sapiens OX=9606 GN=LARS PE=1 SV=2	0	FALSE	9.776	2	3	3	3	1176	134.4	7.3	7.43	3	0	9.90175e+06	6.24511e+06	9.88468e+06
High	IsMasterProtein	P28074	Proteasome subunit beta type-5 OS=Homo sapiens OX=9606 GN=PSMB5 PE=1 SV=3	0	FALSE	9.765	11	3	5	3	263	28.5	6.92	16.1	3	0	1.37552e+07	1.32102e+07	1.3994e+07
High	IsMasterProtein	O00151	PDZ and LIM domain protein 1 OS=Homo sapiens OX=9606 GN=PDLIM1 PE=1 SV=4	0	FALSE	9.71	12	3	7	3	329	36	7.02	18.2	3	0	8.71861e+06	7.95323e+06	8.00067e+06
High	IsMasterProtein	Q8WW12	PEST proteolytic signal-containing nuclear protein OS=Homo sapiens OX=9606 GN=PCNP PE=1 SV=2	0	FALSE	9.54	16	2	3	2	178	18.9	7.49	9.41	2	0	5.62632e+06	4.2788e+06	5.31937e+06
High	IsMasterProtein	Q92598	Heat shock protein 105 kDa OS=Homo sapiens OX=9606 GN=HSPH1 PE=1 SV=1	0	FALSE	9.461	3	2	3	2	858	96.8	5.39	8.36	2	0	4.39189e+06	3.82396e+06	5.03275e+06
High	IsMasterProtein	P32969	60S ribosomal protein L9 OS=Homo sapiens OX=9606 GN=RPL9 PE=1 SV=1	0	FALSE	9.445	17	2	4	2	192	21.9	9.95	14.66	2	0	5.94227e+06	5.10962e+06	5.4037e+06
High	IsMasterProtein	P30153	Serine/threonine-protein phosphatase 2A 65 kDa regulatory subunit A alpha isoform OS=Homo sapiens OX=9606 GN=PPP2R1A PE=1 SV=4	0	FALSE	9.442	6	2	3	2	589	65.3	5.11	10.72	2	0	3.11237e+06	3.1238e+06	3.07036e+06
High	IsMasterProtein	P47756-2	Isoform 2 of F-actin-capping protein subunit beta OS=Homo sapiens OX=9606 GN=CAPZB	0	FALSE	9.436	9	2	5	2	272	30.6	6	14.08	2	0	9.84904e+06	9.57489e+06	8.40324e+06
High	IsMasterProtein	Q8WUM4	Programmed cell death 6-interacting protein OS=Homo sapiens OX=9606 GN=PDCD6IP PE=1 SV=1	0	FALSE	9.434	5	3	4	3	868	96	6.52	6.64	3	0	1.34869e+06	1.71689e+06	1.79067e+06
High	IsMasterProtein	Q9NPA0	ER membrane protein complex subunit 7 OS=Homo sapiens OX=9606 GN=EMC7 PE=1 SV=1	0	FALSE	9.416	12	2	6	2	242	26.5	9.25	21.91	2	0	9.46596e+06	8.39156e+06	7108129
High	IsMasterProtein	P49069	Calcium signal-modulating cyclophilin ligand OS=Homo sapiens OX=9606 GN=CAMLG PE=1 SV=1	0	FALSE	9.265	11	2	6	2	296	32.9	8.05	18.79	2	0	3.65689e+06	4.28881e+06	3.89614e+06
High	IsMasterProtein	Q02978	Mitochondrial 2-oxoglutarate/malate carrier protein OS=Homo sapiens OX=9606 GN=SLC25A11 PE=1 SV=3	0	FALSE	9.21	9	2	4	2	314	34	9.91	7.41	2	0	4.4666e+06	4.19093e+06	4.29962e+06
High	IsMasterProtein	Q96FJ2	Dynein light chain 2, cytoplasmic OS=Homo sapiens OX=9606 GN=DYNLL2 PE=1 SV=1	0	FALSE	9.178	26	2	7	2	89	10.3	7.37	13.68	2	0	1.14965e+07	1.00527e+07	9.21866e+06
High	IsMasterProtein	P23528	Cofilin-1 OS=Homo sapiens OX=9606 GN=CFL1 PE=1 SV=3	0	FALSE	9.147	28	4	7	4	166	18.5	8.09	11.01	4	0	2.21148e+07	1.54239e+07	1.67669e+07
High	IsMasterProtein	P25789	Proteasome subunit alpha type-4 OS=Homo sapiens OX=9606 GN=PSMA4 PE=1 SV=1	0	FALSE	9.124	12	2	4	2	261	29.5	7.72	11.28	2	0	6.17404e+06	5.3986e+06	6.88003e+06
High	IsMasterProtein	Q9NZ01	Very-long-chain enoyl-CoA reductase OS=Homo sapiens OX=9606 GN=TECR PE=1 SV=1	0	FALSE	9.029	9	3	7	3	308	36	9.45	14.16	3	0	1.12427e+07	9.98773e+06	1.09169e+07
High	IsMasterProtein	P61019	Ras-related protein Rab-2A OS=Homo sapiens OX=9606 GN=RAB2A PE=1 SV=1	0	FALSE	8.976	13	2	3	2	212	23.5	6.54	8.54	2	0	6.67702e+06	6.8287e+06	6.22466e+06
High	IsMasterProtein	Q9NR30	Nucleolar RNA helicase 2 OS=Homo sapiens OX=9606 GN=DDX21 PE=1 SV=5	0	FALSE	8.969	4	3	7	3	783	87.3	9.28	20.63	3	0	5.72913e+06	3.38171e+06	4.05752e+06
High	IsMasterProtein	P43487	Ran-specific GTPase-activating protein OS=Homo sapiens OX=9606 GN=RANBP1 PE=1 SV=1	0	FALSE	8.931	15	2	2	2	201	23.3	5.29	4.27	2	0	5.10034e+06	3.52613e+06	5.2417e+06
High	IsMasterProtein	P11388	DNA topoisomerase 2-alpha OS=Homo sapiens OX=9606 GN=TOP2A PE=1 SV=3	0	FALSE	8.839	2	3	5	3	1531	174.3	8.72	11.65	3	0	5.13054e+06	4.14961e+06	3.2623e+06
High	IsMasterProtein	P11940	Polyadenylate-binding protein 1 OS=Homo sapiens OX=9606 GN=PABPC1 PE=1 SV=2	0	FALSE	8.833	4	2	2	2	636	70.6	9.5	5.85	2	0	3.69891e+06	3.2278e+06	3.28457e+06
High	IsMasterProtein	P49755	Transmembrane emp24 domain-containing protein 10 OS=Homo sapiens OX=9606 GN=TMED10 PE=1 SV=2	0	FALSE	8.832	10	2	6	2	219	25	7.44	18.7	2	0	2.16398e+07	1.88622e+07	1.93644e+07
High	IsMasterProtein	P17858	ATP-dependent 6-phosphofructokinase, liver type OS=Homo sapiens OX=9606 GN=PFKL PE=1 SV=6	0	FALSE	8.828	3	2	6	2	780	85	7.5	11.21	2	0	2.3846e+06	2.14546e+06	2.40041e+06
High	IsMasterProtein	Q8WYP5	Protein ELYS OS=Homo sapiens OX=9606 GN=AHCTF1 PE=1 SV=3	0	FALSE	8.812	1	2	2	2	2266	252.3	6.6	7.1	2	0	2.53307e+06	2.44338e+06	2.58768e+06
High	IsMasterProtein	Q13724	Mannosyl-oligosaccharide glucosidase OS=Homo sapiens OX=9606 GN=MOGS PE=1 SV=5	0	FALSE	8.756	5	2	3	2	837	91.9	8.9	11.12	2	0	2.0252e+06	2.16607e+06	1.94236e+06
High	IsMasterProtein	P62805	Histone H4 OS=Homo sapiens OX=9606 GN=H4C1 PE=1 SV=2	0	FALSE	8.727	27	3	9	3	103	11.4	11.36	22.65	3	0	3.64289e+07	3.10948e+07	3.37404e+07
High	IsMasterProtein	Q14677	Clathrin interactor 1 OS=Homo sapiens OX=9606 GN=CLINT1 PE=1 SV=1	0	FALSE	8.688	5	2	4	2	625	68.2	6.42	16.09	2	0	5.62574e+06	5.77645e+06	7.25525e+06
High	IsMasterProtein	P22695	Cytochrome b-c1 complex subunit 2, mitochondrial OS=Homo sapiens OX=9606 GN=UQCRC2 PE=1 SV=3	0	FALSE	8.678	6	2	3	2	453	48.4	8.63	10.23	2	0	246739	1.48804e+06	1.12998e+06
High	IsMasterProtein	Q96FW1	Ubiquitin thioesterase OTUB1 OS=Homo sapiens OX=9606 GN=OTUB1 PE=1 SV=2	0	FALSE	8.626	12	3	4	3	271	31.3	4.94	9.78	3	0	1.2413e+07	1.13554e+07	1.07288e+07
High	IsMasterProtein	P49257	Protein ERGIC-53 OS=Homo sapiens OX=9606 GN=LMAN1 PE=1 SV=2	0	FALSE	8.613	5	3	7	3	510	57.5	6.77	16.18	3	0	1.05981e+07	1.06559e+07	8734037
High	IsMasterProtein	P30041	Peroxiredoxin-6 OS=Homo sapiens OX=9606 GN=PRDX6 PE=1 SV=3	0	FALSE	8.602	13	3	9	3	224	25	6.38	20.72	3	0	2.84064e+07	2.8369e+07	26702387
High	IsMasterProtein	Q8N766	ER membrane protein complex subunit 1 OS=Homo sapiens OX=9606 GN=EMC1 PE=1 SV=1	0	FALSE	8.594	3	2	3	2	993	111.7	7.66	7.71	2	0	945958	1.10277e+06	1041291
High	IsMasterProtein	Q9UM00	Calcium load-activated calcium channel OS=Homo sapiens OX=9606 GN=TMCO1 PE=1 SV=2	0	FALSE	8.582	10	2	4	2	239	27.1	10.26	14.13	2	0	1.15308e+07	1.23554e+07	9753328
High	IsMasterProtein	P40429	60S ribosomal protein L13a OS=Homo sapiens OX=9606 GN=RPL13A PE=1 SV=2	0	FALSE	8.552	19	5	13	5	203	23.6	10.93	9	5	0	4.67481e+07	3.86853e+07	5.12044e+07
High	IsMasterProtein	O75534	Cold shock domain-containing protein E1 OS=Homo sapiens OX=9606 GN=CSDE1 PE=1 SV=2	0	FALSE	8.531	4	3	6	3	798	88.8	6.25	14.61	3	0	3.71643e+06	4.49387e+06	4.07211e+06
High	IsMasterProtein	P17812	CTP synthase 1 OS=Homo sapiens OX=9606 GN=CTPS1 PE=1 SV=2	0	FALSE	8.509	5	2	5	2	591	66.6	6.46	14.6	2	0	3.7373e+06	3.83154e+06	4.35749e+06
High	IsMasterProtein	P60763	Ras-related C3 botulinum toxin substrate 3 OS=Homo sapiens OX=9606 GN=RAC3 PE=1 SV=1	0	FALSE	8.406	15	3	5	2	192	21.4	8.15	11.18	3	1	1.26941e+07	1.22041e+07	7751425
High	IsMasterProtein	P54578	Ubiquitin carboxyl-terminal hydrolase 14 OS=Homo sapiens OX=9606 GN=USP14 PE=1 SV=3	0	FALSE	8.385	5	3	7	3	494	56	5.3	15.36	3	0	1.33074e+07	1.38548e+07	1.36177e+07
High	IsMasterProtein	P53004	Biliverdin reductase A OS=Homo sapiens OX=9606 GN=BLVRA PE=1 SV=2	0	FALSE	8.351	9	2	3	2	296	33.4	6.44	8.86	2	0	2.86031e+06	3.60954e+06	3.10963e+06
High	IsMasterProtein	O76094	Signal recognition particle subunit SRP72 OS=Homo sapiens OX=9606 GN=SRP72 PE=1 SV=3	0	FALSE	8.298	6	2	3	2	671	74.6	9.26	6.43	2	0	756339	2.37082e+06	1.13887e+06
High	IsMasterProtein	P00492	Hypoxanthine-guanine phosphoribosyltransferase OS=Homo sapiens OX=9606 GN=HPRT1 PE=1 SV=2	0	FALSE	8.203	14	3	6	3	218	24.6	6.68	12.6	3	0	1.31155e+07	1.3146e+07	1.24281e+07
High	IsMasterProtein	P0DN79	Cystathionine beta-synthase-like protein OS=Homo sapiens OX=9606 GN=CBSL PE=1 SV=1	0	FALSE	8.152	4	2	2	2	551	60.5	6.65	5.97	2	0	7.88109e+06	7.47566e+06	7.04563e+06
High	IsMasterProtein	P26373	60S ribosomal protein L13 OS=Homo sapiens OX=9606 GN=RPL13 PE=1 SV=4	0	FALSE	8.144	14	3	4	3	211	24.2	11.65	9.81	3	0	1.19601e+07	1.12097e+07	1.08464e+07
High	IsMasterProtein	P09960	Leukotriene A-4 hydrolase OS=Homo sapiens OX=9606 GN=LTA4H PE=1 SV=2	0	FALSE	8.127	5	2	2	2	611	69.2	6.18	6.42	2	0	3.37896e+06	3.42774e+06	3.74135e+06
High	IsMasterProtein	P12004	Proliferating cell nuclear antigen OS=Homo sapiens OX=9606 GN=PCNA PE=1 SV=1	0	FALSE	8.125	14	3	7	3	261	28.8	4.69	15.21	3	0	8.50372e+07	9.89601e+07	68911393
High	IsMasterProtein	O75643	U5 small nuclear ribonucleoprotein 200 kDa helicase OS=Homo sapiens OX=9606 GN=SNRNP200 PE=1 SV=2	0	FALSE	8.101	1	2	4	2	2136	244.4	6.06	10.05	2	0	2.91949e+06	2.68584e+06	2.47247e+06
High	IsMasterProtein	P30048	Thioredoxin-dependent peroxide reductase, mitochondrial OS=Homo sapiens OX=9606 GN=PRDX3 PE=1 SV=3	0	FALSE	8.036	9	2	6	2	256	27.7	7.78	13.05	2	0	7.7953e+06	8.0887e+06	7.71231e+06
High	IsMasterProtein	O60684	Importin subunit alpha-7 OS=Homo sapiens OX=9606 GN=KPNA6 PE=1 SV=1	0	FALSE	8.029	6	3	7	3	536	60	4.98	14.3	3	0	7.5113e+06	7.98502e+06	7.47106e+06
High	IsMasterProtein	Q15046	Lysine--tRNA ligase OS=Homo sapiens OX=9606 GN=KARS1 PE=1 SV=3	0	FALSE	8.016	4	2	5	2	597	68	6.35	14.87	2	0	2.36242e+06	2.96062e+06	3.03778e+06
High	IsMasterProtein	P08134	Rho-related GTP-binding protein RhoC OS=Homo sapiens OX=9606 GN=RHOC PE=1 SV=1	0	FALSE	7.923	17	3	8	3	193	22	6.58	15.46	3	0	1.76251e+07	1.95033e+07	1.6063e+07
High	IsMasterProtein	P14866	Heterogeneous nuclear ribonucleoprotein L OS=Homo sapiens OX=9606 GN=HNRNPL PE=1 SV=2	0	FALSE	7.907	4	2	3	2	589	64.1	8.22	7.91	2	0	5.72705e+06	2.11245e+06	6.21933e+06
High	IsMasterProtein	P34932	Heat shock 70 kDa protein 4 OS=Homo sapiens OX=9606 GN=HSPA4 PE=1 SV=4	0	FALSE	7.902	4	2	4	2	840	94.3	5.19	13.51	2	0	5.24508e+06	4.48687e+06	5291231
High	IsMasterProtein	P62491	Ras-related protein Rab-11A OS=Homo sapiens OX=9606 GN=RAB11A PE=1 SV=3	0	FALSE	7.859	11	2	5	2	216	24.4	6.57	14.85	2	0	2.5134e+06	7.66333e+06	2.50683e+06
High	IsMasterProtein	P31947	14-3-3 protein sigma OS=Homo sapiens OX=9606 GN=SFN PE=1 SV=1	0	FALSE	7.849	10	3	15	1	248	27.8	4.74	24.68	3	0	3.9554e+07	4.07954e+07	40251924
High	IsMasterProtein	O75396	Vesicle-trafficking protein SEC22b OS=Homo sapiens OX=9606 GN=SEC22B PE=1 SV=4	0	FALSE	7.84	16	2	5	2	215	24.6	6.92	14.78	2	0	1.1567e+07	1.34864e+07	12982057
High	IsMasterProtein	P63173	60S ribosomal protein L38 OS=Homo sapiens OX=9606 GN=RPL38 PE=1 SV=2	0	FALSE	7.748	39	3	12	3	70	8.2	10.1	20.16	3	0	9.03359e+07	9.59363e+07	86556812
High	IsMasterProtein	Q9ULE6	Paladin OS=Homo sapiens OX=9606 GN=PALD1 PE=1 SV=3	0	FALSE	7.74	4	3	6	3	856	96.7	6.54	13.75	3	0	5.88239e+06	5.24109e+06	5.70457e+06
High	IsMasterProtein	Q7Z4W1	L-xylulose reductase OS=Homo sapiens OX=9606 GN=DCXR PE=1 SV=2	0	FALSE	7.704	11	3	7	3	244	25.9	8.1	7.46	3	0	5.03176e+06	5.81379e+06	4.76339e+06
High	IsMasterProtein	P60228	Eukaryotic translation initiation factor 3 subunit E OS=Homo sapiens OX=9606 GN=EIF3E PE=1 SV=1	0	FALSE	7.657	7	3	7	3	445	52.2	6.04	17.13	3	0	1.22148e+07	1.12126e+07	1.23635e+07
High	IsMasterProtein	O15145	Actin-related protein 2/3 complex subunit 3 OS=Homo sapiens OX=9606 GN=ARPC3 PE=1 SV=3	0	FALSE	7.63	20	3	4	3	178	20.5	8.59	5.7	3	0	1.05657e+08	1.07014e+08	9.94787e+07
High	IsMasterProtein	Q15392	Delta(24)-sterol reductase OS=Homo sapiens OX=9606 GN=DHCR24 PE=1 SV=2	0	FALSE	7.601	4	2	6	2	516	60.1	8.16	15.18	2	0	4.75224e+06	4.90474e+06	4.9747e+06
High	IsMasterProtein	Q8N511	Transmembrane protein 199 OS=Homo sapiens OX=9606 GN=TMEM199 PE=1 SV=1	0	FALSE	7.551	12	2	6	2	208	23.1	9.01	18.7	2	0	1.05648e+07	9.71505e+06	9.64597e+06
High	IsMasterProtein	O15269	Serine palmitoyltransferase 1 OS=Homo sapiens OX=9606 GN=SPTLC1 PE=1 SV=1	0	FALSE	7.507	5	2	5	2	473	52.7	6.01	13.96	2	0	4.21666e+06	3.75921e+06	3.75387e+06
High	IsMasterProtein	Q9Y678	Coatomer subunit gamma-1 OS=Homo sapiens OX=9606 GN=COPG1 PE=1 SV=1	0	FALSE	7.5	4	3	13	2	874	97.7	5.47	16.33	3	1	8.55325e+06	1.1021e+08	1.03894e+08
High	IsMasterProtein	Q14978	Nucleolar and coiled-body phosphoprotein 1 OS=Homo sapiens OX=9606 GN=NOLC1 PE=1 SV=2	0	FALSE	7.485	4	2	7	2	699	73.6	9.47	14.67	2	0	1.90371e+06	1.95169e+06	2.03007e+06
High	IsMasterProtein	P62424	60S ribosomal protein L7a OS=Homo sapiens OX=9606 GN=RPL7A PE=1 SV=2	0	FALSE	7.401	10	2	2	2	266	30	10.61	5.84	2	0	7.53835e+06	7.17425e+06	6.3609e+06
High	IsMasterProtein	Q9HBM0	Vezatin OS=Homo sapiens OX=9606 GN=VEZT PE=1 SV=3	0	FALSE	7.285	3	2	5	2	779	88.6	5.2	12	2	0	2.41048e+06	2.41766e+06	2.14374e+06
High	IsMasterProtein	O15371	Eukaryotic translation initiation factor 3 subunit D OS=Homo sapiens OX=9606 GN=EIF3D PE=1 SV=1	0	FALSE	7.236	5	2	5	2	548	63.9	6.05	20.45	2	0	8.02166e+06	6.42531e+06	7.31402e+06
High	IsMasterProtein	P49591	Serine--tRNA ligase, cytoplasmic OS=Homo sapiens OX=9606 GN=SARS PE=1 SV=3	0	FALSE	7.215	7	3	7	3	514	58.7	6.43	17.08	3	0	1.03544e+07	1.0008e+07	1.08194e+07
High	IsMasterProtein	P61221	ATP-binding cassette sub-family E member 1 OS=Homo sapiens OX=9606 GN=ABCE1 PE=1 SV=1	0	FALSE	7.175	4	2	2	2	599	67.3	8.34	5.5	2	0	4.45688e+06	4.71338e+06	5.12514e+06
High	IsMasterProtein	Q9BV81	ER membrane protein complex subunit 6 OS=Homo sapiens OX=9606 GN=EMC6 PE=1 SV=1	0	FALSE	7.135	21	2	4	2	110	12	10.07	14.54	2	0	8.09247e+06	7.07312e+06	7.84107e+06
High	IsMasterProtein	P07910	Heterogeneous nuclear ribonucleoproteins C1/C2 OS=Homo sapiens OX=9606 GN=HNRNPC PE=1 SV=4	0	FALSE	7.133	8	2	6	2	306	33.7	5.08	17.47	2	0	1.11387e+07	1.16501e+07	12348144
High	IsMasterProtein	P55072	Transitional endoplasmic reticulum ATPase OS=Homo sapiens OX=9606 GN=VCP PE=1 SV=4	0	FALSE	7.112	4	2	3	2	806	89.3	5.26	7.7	2	0	3.80207e+06	3.36592e+06	3.20567e+06
High	IsMasterProtein	P43307	Translocon-associated protein subunit alpha OS=Homo sapiens OX=9606 GN=SSR1 PE=1 SV=3	0	FALSE	7.07	8	2	5	2	286	32.2	4.49	9.91	2	0	9.89298e+06	9.64453e+06	1.02269e+07
High	IsMasterProtein	Q9UBF2	Coatomer subunit gamma-2 OS=Homo sapiens OX=9606 GN=COPG2 PE=1 SV=1	0	FALSE	7.001	3	2	11	1	871	97.6	5.81	10.06	2	0	358053	354149	352565
High	IsMasterProtein	Q13155	Aminoacyl tRNA synthase complex-interacting multifunctional protein 2 OS=Homo sapiens OX=9606 GN=AIMP2 PE=1 SV=2	0	FALSE	6.978	8	2	5	2	320	35.3	8.22	13.62	2	0	7.37809e+06	7.78534e+06	7.21327e+06
High	IsMasterProtein	Q9Y490	Talin-1 OS=Homo sapiens OX=9606 GN=TLN1 PE=1 SV=3	0	FALSE	6.972	1	2	4	2	2541	269.6	6.07	11.87	2	0	3.3937e+07	3.68543e+07	2.67159e+07
High	IsMasterProtein	Q9UMS4	Pre-mRNA-processing factor 19 OS=Homo sapiens OX=9606 GN=PRPF19 PE=1 SV=1	0	FALSE	6.907	5	2	5	2	504	55.1	6.61	11.76	2	0	5.5366e+06	5.59366e+06	5.58757e+06
High	IsMasterProtein	Q9Y265	RuvB-like 1 OS=Homo sapiens OX=9606 GN=RUVBL1 PE=1 SV=1	0	FALSE	6.83	7	3	5	3	456	50.2	6.42	6.01	3	0	1.69589e+07	1.48651e+07	1.42855e+07
High	IsMasterProtein	P27816	Microtubule-associated protein 4 OS=Homo sapiens OX=9606 GN=MAP4 PE=1 SV=3	0	FALSE	6.803	2	2	3	2	1152	120.9	5.43	7.08	2	0	9.35083e+06	7.91388e+06	9.21032e+06
High	IsMasterProtein	P12268	Inosine-5'-monophosphate dehydrogenase 2 OS=Homo sapiens OX=9606 GN=IMPDH2 PE=1 SV=2	0	FALSE	6.756	4	2	5	2	514	55.8	6.9	14.87	2	0	4.30939e+06	3.70668e+06	2.41901e+06
High	IsMasterProtein	P55884	Eukaryotic translation initiation factor 3 subunit B OS=Homo sapiens OX=9606 GN=EIF3B PE=1 SV=3	0	FALSE	6.733	3	2	4	2	814	92.4	5	9.72	2	0	5.93996e+06	5.47127e+06	4.93479e+06
High	IsMasterProtein	P25788	Proteasome subunit alpha type-3 OS=Homo sapiens OX=9606 GN=PSMA3 PE=1 SV=2	0	FALSE	6.711	9	2	6	2	255	28.4	5.33	17.31	2	0	9.98153e+06	9.50907e+06	9.16686e+06
High	IsMasterProtein	P62269	40S ribosomal protein S18 OS=Homo sapiens OX=9606 GN=RPS18 PE=1 SV=3	0	FALSE	6.679	16	3	8	3	152	17.7	10.99	14.24	3	0	9.74706e+06	3.8032e+06	9010983
High	IsMasterProtein	P40616	ADP-ribosylation factor-like protein 1 OS=Homo sapiens OX=9606 GN=ARL1 PE=1 SV=1	0	FALSE	6.617	11	2	4	2	181	20.4	5.72	9.76	2	0	5.83682e+06	5.29437e+06	5.08294e+06
High	IsMasterProtein	Q8N3F8	MICAL-like protein 1 OS=Homo sapiens OX=9606 GN=MICALL1 PE=1 SV=2	0	FALSE	6.556	4	3	6	3	863	93.4	7.25	19.98	3	0	9.59887e+06	1.00997e+07	9.80466e+06
High	IsMasterProtein	Q05519	Serine/arginine-rich splicing factor 11 OS=Homo sapiens OX=9606 GN=SRSF11 PE=1 SV=1	0	FALSE	6.543	5	2	4	2	484	53.5	10.52	6.62	2	0	7.46535e+06	7.08298e+06	7.9499e+06
High	IsMasterProtein	Q9NRW1	Ras-related protein Rab-6B OS=Homo sapiens OX=9606 GN=RAB6B PE=1 SV=1	0	FALSE	6.445	9	2	2	1	208	23.4	5.53	2.6	2	0	2.18016e+06	2.2786e+06	2.75131e+06
High	IsMasterProtein	P78344	Eukaryotic translation initiation factor 4 gamma 2 OS=Homo sapiens OX=9606 GN=EIF4G2 PE=1 SV=1	0	FALSE	6.227	2	2	4	2	907	102.3	7.14	8.68	2	0	4.62151e+06	4.18715e+06	4.40104e+06
High	IsMasterProtein	Q13620-1	Isoform 2 of Cullin-4B OS=Homo sapiens OX=9606 GN=CUL4B	0	FALSE	6.222	3	2	7	2	895	102.2	7.94	10.51	2	0	4.88243e+06	5.31608e+06	5.4613e+06
High	IsMasterProtein	Q12907	Vesicular integral-membrane protein VIP36 OS=Homo sapiens OX=9606 GN=LMAN2 PE=1 SV=1	0	FALSE	6.183	6	2	3	2	356	40.2	6.95	6.71	2	0	6.86667e+06	7.39104e+06	2.71751e+06
High	IsMasterProtein	P35610	Sterol O-acyltransferase 1 OS=Homo sapiens OX=9606 GN=SOAT1 PE=1 SV=3	0	FALSE	6.177	3	2	4	2	550	64.7	8.94	9.48	2	0	9.76234e+06	6.98524e+06	7.45792e+06
High	IsMasterProtein	Q9Y2H6	Fibronectin type-III domain-containing protein 3A OS=Homo sapiens OX=9606 GN=FNDC3A PE=1 SV=4	0	FALSE	6.045	3	3	4	3	1198	131.8	6.71	6.41	3	0	5.8273e+06	5.96666e+06	6507523
High	IsMasterProtein	P62753	40S ribosomal protein S6 OS=Homo sapiens OX=9606 GN=RPS6 PE=1 SV=1	0	FALSE	6.013	8	2	5	2	249	28.7	10.84	8.51	2	0	4.48498e+06	3.19212e+06	4.38612e+06
High	IsMasterProtein	P61353	60S ribosomal protein L27 OS=Homo sapiens OX=9606 GN=RPL27 PE=1 SV=2	0	FALSE	5.969	28	3	8	3	136	15.8	10.56	20.26	3	0	3.96505e+07	3.84494e+07	3.77354e+07
High	IsMasterProtein	P27694	Replication protein A 70 kDa DNA-binding subunit OS=Homo sapiens OX=9606 GN=RPA1 PE=1 SV=2	0	FALSE	5.924	4	2	5	2	616	68.1	7.21	12.74	2	0	5.68829e+06	5.97902e+06	4.54758e+06
High	IsMasterProtein	Q6NUQ4	Transmembrane protein 214 OS=Homo sapiens OX=9606 GN=TMEM214 PE=1 SV=2	0	FALSE	5.893	5	2	2	2	689	77.1	9.14	5.39	2	0	1.29578e+06	1.19135e+06	1.26148e+06
High	IsMasterProtein	P61158	Actin-related protein 3 OS=Homo sapiens OX=9606 GN=ACTR3 PE=1 SV=3	0	FALSE	5.888	5	2	4	2	418	47.3	5.88	10.56	2	0	3.16626e+06	3.10708e+06	3.1311e+06
High	IsMasterProtein	Q9UNZ2	NSFL1 cofactor p47 OS=Homo sapiens OX=9606 GN=NSFL1C PE=1 SV=2	0	FALSE	5.864	8	2	3	2	370	40.5	5.1	10.14	2	0	4.14638e+06	4.14962e+06	4.24313e+06
High	IsMasterProtein	P54886	Delta-1-pyrroline-5-carboxylate synthase OS=Homo sapiens OX=9606 GN=ALDH18A1 PE=1 SV=2	0	FALSE	5.824	3	3	6	3	795	87.2	7.12	13.82	3	0	6.93346e+06	7.15044e+06	6.56217e+06
High	IsMasterProtein	Q9BXB4	Oxysterol-binding protein-related protein 11 OS=Homo sapiens OX=9606 GN=OSBPL11 PE=1 SV=2	0	FALSE	5.792	4	2	4	2	747	83.6	7.06	7.12	2	0	3.12752e+06	2.05109e+06	2.43202e+06
High	IsMasterProtein	Q14152	Eukaryotic translation initiation factor 3 subunit A OS=Homo sapiens OX=9606 GN=EIF3A PE=1 SV=1	0	FALSE	5.784	2	2	2	2	1382	166.5	6.79	5.39	2	0	6.05211e+06	5.65958e+06	3484780
High	IsMasterProtein	Q7L1Q6	Basic leucine zipper and W2 domain-containing protein 1 OS=Homo sapiens OX=9606 GN=BZW1 PE=1 SV=1	0	FALSE	5.782	5	3	7	1	419	48	5.92	12.11	3	2	1.11598e+07	1.04249e+07	1.05278e+07
High	IsMasterProtein	Q9NRY5	Protein FAM114A2 OS=Homo sapiens OX=9606 GN=FAM114A2 PE=1 SV=4	0	FALSE	5.539	9	3	4	3	505	55.4	4.88	9.99	3	0	3.62772e+06	4.83581e+06	2.02289e+06
High	IsMasterProtein	P20674	Cytochrome c oxidase subunit 5A, mitochondrial OS=Homo sapiens OX=9606 GN=COX5A PE=1 SV=2	0	FALSE	5.52	11	3	6	3	150	16.8	6.79	15.49	3	0	1.0777e+07	7.97623e+06	8756863
High	IsMasterProtein	P62861	40S ribosomal protein S30 OS=Homo sapiens OX=9606 GN=FAU PE=1 SV=1	0	FALSE	5.192	19	2	5	2	59	6.6	12.15	12.11	2	0	2.38947e+07	2.02344e+07	20356976
High	IsMasterProtein	P14314	Glucosidase 2 subunit beta OS=Homo sapiens OX=9606 GN=PRKCSH PE=1 SV=2	0	FALSE	5.177	4	2	3	2	528	59.4	4.41	7.18	2	0	6.2638e+06	5.10328e+06	5.2927e+06
High	IsMasterProtein	P60866	40S ribosomal protein S20 OS=Homo sapiens OX=9606 GN=RPS20 PE=1 SV=1	0	FALSE	5.119	20	2	2	2	119	13.4	9.94	6.73	2	0	1.39527e+07	1.5437e+07	1.28634e+07
High	IsMasterProtein	P48444	Coatomer subunit delta OS=Homo sapiens OX=9606 GN=ARCN1 PE=1 SV=1	0	FALSE	5.099	4	2	4	2	511	57.2	6.21	6.44	2	0	2.24063e+06	7.11956e+06	2.74387e+06
High	IsMasterProtein	Q9HAV0	Guanine nucleotide-binding protein subunit beta-4 OS=Homo sapiens OX=9606 GN=GNB4 PE=1 SV=3	0	FALSE	5.022	6	2	4	2	340	37.5	6	9.79	2	0	7.25591e+06	6.60782e+06	7.64163e+06
High	IsMasterProtein	P19367	Hexokinase-1 OS=Homo sapiens OX=9606 GN=HK1 PE=1 SV=3	0	FALSE	5.02	3	2	3	2	917	102.4	6.8	7	2	0	421397	460054	1.86488e+06
High	IsMasterProtein	P61604	10 kDa heat shock protein, mitochondrial OS=Homo sapiens OX=9606 GN=HSPE1 PE=1 SV=2	0	FALSE	5.015	21	2	4	2	102	10.9	8.92	8.34	2	0	1.0326e+07	8.57876e+06	8.51409e+06
High	IsMasterProtein	P23246	Splicing factor, proline- and glutamine-rich OS=Homo sapiens OX=9606 GN=SFPQ PE=1 SV=2	0	FALSE	5.01	3	2	2	1	707	76.1	9.44	4.8	2	0
High	IsMasterProtein	O15260	Surfeit locus protein 4 OS=Homo sapiens OX=9606 GN=SURF4 PE=1 SV=3	0	FALSE	4.982	8	2	4	2	269	30.4	7.78	9.82	2	0	6.54922e+06	5.06583e+06	4980721
High	IsMasterProtein	O75436	Vacuolar protein sorting-associated protein 26A OS=Homo sapiens OX=9606 GN=VPS26A PE=1 SV=2	0	FALSE	4.949	5	2	4	2	327	38.1	6.57	10.8	2	0	2.28275e+06	2.14318e+06	2.42018e+06
High	IsMasterProtein	P11586	C-1-tetrahydrofolate synthase, cytoplasmic OS=Homo sapiens OX=9606 GN=MTHFD1 PE=1 SV=3	0	FALSE	4.909	3	2	2	2	935	101.5	7.3	3.73	2	0	5.05979e+06	4.89827e+06	4.10783e+06
High	IsMasterProtein	O14744	Protein arginine N-methyltransferase 5 OS=Homo sapiens OX=9606 GN=PRMT5 PE=1 SV=4	0	FALSE	4.857	8	3	5	3	637	72.6	6.29	10.25	3	0	7.93633e+06	6.73768e+06	5.40163e+06
High	IsMasterProtein	P16435	NADPH--cytochrome P450 reductase OS=Homo sapiens OX=9606 GN=POR PE=1 SV=2	0	FALSE	4.844	3	2	5	2	677	76.6	5.58	12.48	2	0	5.13072e+06	6.04004e+06	5.90503e+06
High	IsMasterProtein	P61289	Proteasome activator complex subunit 3 OS=Homo sapiens OX=9606 GN=PSME3 PE=1 SV=1	0	FALSE	4.776	8	2	2	2	254	29.5	5.95	4.67	2	0	4.83282e+06	4.54677e+06	4.39745e+06
High	IsMasterProtein	Q9BVK6	Transmembrane emp24 domain-containing protein 9 OS=Homo sapiens OX=9606 GN=TMED9 PE=1 SV=2	0	FALSE	4.74	8	2	4	2	235	27.3	8.02	8.41	2	0	4.40444e+06	8.24654e+06	7099782
High	IsMasterProtein	Q9H2G2	STE20-like serine/threonine-protein kinase OS=Homo sapiens OX=9606 GN=SLK PE=1 SV=1	0	FALSE	4.729	2	2	3	2	1235	142.6	5.15	7.28	2	0	4.02412e+06	4.2044e+06	3.61577e+06
High	IsMasterProtein	Q96SK2	Transmembrane protein 209 OS=Homo sapiens OX=9606 GN=TMEM209 PE=1 SV=2	0	FALSE	4.71	4	3	7	3	561	62.9	8.63	6.34	3	0	7.53409e+06	1.28781e+07	1.18561e+07
High	IsMasterProtein	Q9Y6E2	Basic leucine zipper and W2 domain-containing protein 2 OS=Homo sapiens OX=9606 GN=BZW2 PE=1 SV=1	0	FALSE	4.602	5	3	8	1	419	48.1	6.68	9.81	3	0	866622	843001	1.12454e+06
High	IsMasterProtein	Q9H7C9	Mth938 domain-containing protein OS=Homo sapiens OX=9606 GN=AAMDC PE=1 SV=1	0	FALSE	4.601	16	2	4	2	122	13.3	8.46	7.63	2	0	1.25839e+06	4.73953e+06	1.07453e+06
High	IsMasterProtein	P18077	60S ribosomal protein L35a OS=Homo sapiens OX=9606 GN=RPL35A PE=1 SV=2	0	FALSE	4.563	17	2	7	2	110	12.5	11.06	15.63	2	0	1.25273e+07	1.14757e+07	9879604
High	IsMasterProtein	Q13247	Serine/arginine-rich splicing factor 6 OS=Homo sapiens OX=9606 GN=SRSF6 PE=1 SV=2	0	FALSE	4.556	5	2	6	2	344	39.6	11.43	10.36	2	0	1.20067e+07	1.19302e+07	1.00867e+07
High	IsMasterProtein	P08133	Annexin A6 OS=Homo sapiens OX=9606 GN=ANXA6 PE=1 SV=3	0	FALSE	4.512	3	2	3	2	673	75.8	5.6	5.72	2	0	4.57492e+06	3.80832e+06	3.79328e+06
High	IsMasterProtein	P46779	60S ribosomal protein L28 OS=Homo sapiens OX=9606 GN=RPL28 PE=1 SV=3	0	FALSE	4.501	15	3	5	3	137	15.7	12.02	9.45	3	0	1.13311e+07	1.1464e+07	9.66797e+06
High	IsMasterProtein	P55010	Eukaryotic translation initiation factor 5 OS=Homo sapiens OX=9606 GN=EIF5 PE=1 SV=2	0	FALSE	4.493	4	2	6	2	431	49.2	5.58	11.71	2	0	5.50917e+06	5.45771e+06	5106983
High	IsMasterProtein	Q99623	Prohibitin-2 OS=Homo sapiens OX=9606 GN=PHB2 PE=1 SV=2	0	FALSE	4.435	6	2	4	2	299	33.3	9.83	7.97	2	0	5.72864e+06	4.97861e+06	5.26375e+06
High	IsMasterProtein	O14929	Histone acetyltransferase type B catalytic subunit OS=Homo sapiens OX=9606 GN=HAT1 PE=1 SV=1	0	FALSE	4.369	7	2	2	2	419	49.5	5.69	4.94	2	0	1.2164e+06	3.84412e+06	1742135
High	IsMasterProtein	P13073	Cytochrome c oxidase subunit 4 isoform 1, mitochondrial OS=Homo sapiens OX=9606 GN=COX4I1 PE=1 SV=1	0	FALSE	4.359	13	2	4	2	169	19.6	9.51	10.04	2	0	8.1514e+06	5.83126e+06	5677501
High	IsMasterProtein	P55196-1	Isoform 2 of Afadin OS=Homo sapiens OX=9606 GN=AFDN	0	FALSE	4.275	1	2	3	2	1816	205.5	6.77	4.8	2	0	1.43668e+06	2.61122e+06	1.83753e+06
High	IsMasterProtein	Q92997	Segment polarity protein dishevelled homolog DVL-3 OS=Homo sapiens OX=9606 GN=DVL3 PE=1 SV=2	0	FALSE	4.222	2	2	2	1	716	78	6.65	4.81	2	0	3.21035e+06	2.66632e+06	3.22783e+06
High	IsMasterProtein	Q96EB1	Elongator complex protein 4 OS=Homo sapiens OX=9606 GN=ELP4 PE=1 SV=2	0	FALSE	4.15	7	2	3	2	424	46.6	8.51	2.36	2	0	5.04527e+06	1.98063e+06	7.75542e+06
High	IsMasterProtein	P52292	Importin subunit alpha-1 OS=Homo sapiens OX=9606 GN=KPNA2 PE=1 SV=1	0	FALSE	4.103	5	2	2	2	529	57.8	5.4	2.15	2	0	3.95076e+06	744163	4.03736e+06
High	IsMasterProtein	A8CG34	Nuclear envelope pore membrane protein POM 121C OS=Homo sapiens OX=9606 GN=POM121C PE=1 SV=3	0	FALSE	4.034	1	2	2	2	1229	125	10.37	0	2	0	1.05575e+06	1.07148e+06	1.39975e+06
High	IsMasterProtein	O60884	DnaJ homolog subfamily A member 2 OS=Homo sapiens OX=9606 GN=DNAJA2 PE=1 SV=1	0	FALSE	4.012	4	2	3	2	412	45.7	6.48	5.43	2	0	4.26843e+06	4.2416e+06	4.86792e+06
High	IsMasterProtein	Q5JXB2	Putative ubiquitin-conjugating enzyme E2 N-like OS=Homo sapiens OX=9606 GN=UBE2NL PE=1 SV=1	0	FALSE	3.894	12	2	2	2	153	17.4	5.92	0	2	0	5.62635e+06	5.03108e+06	4404648
High	IsMasterProtein	Q9UNM6	26S proteasome non-ATPase regulatory subunit 13 OS=Homo sapiens OX=9606 GN=PSMD13 PE=1 SV=2	0	FALSE	3.857	4	2	2	2	376	42.9	5.81	1.7	2	0	5.28772e+06	5.10345e+06	4486747
High	IsMasterProtein	P17844	Probable ATP-dependent RNA helicase DDX5 OS=Homo sapiens OX=9606 GN=DDX5 PE=1 SV=1	0	FALSE	3.585	3	2	2	2	614	69.1	8.92	2.72	2	0	6.1637e+06	6.69349e+06	6.29608e+06
High	IsMasterProtein	P27797	Calreticulin OS=Homo sapiens OX=9606 GN=CALR PE=1 SV=1	0	FALSE	3.571	5	2	3	2	417	48.1	4.44	3.12	2	0	6.15798e+06	6.11004e+06	4.91548e+06
High	IsMasterProtein	Q8TCT9	Minor histocompatibility antigen H13 OS=Homo sapiens OX=9606 GN=HM13 PE=1 SV=1	0	FALSE	3.553	5	2	4	2	377	41.5	6.43	5.15	2	0	7.17983e+06	7.67007e+06	5.93635e+06
High	IsMasterProtein	Q5BJF2	Sigma intracellular receptor 2 OS=Homo sapiens OX=9606 GN=TMEM97 PE=1 SV=1	0	FALSE	3.491	10	2	3	2	176	20.8	9.38	1.81	2	0	3.40638e+06	2.48687e+06	3.15768e+06
High	IsMasterProtein	P84243	Histone H3.3 OS=Homo sapiens OX=9606 GN=H3-3A PE=1 SV=2	0	FALSE	3.219	12	2	5	2	136	15.3	11.27	5.59	2	0	2.86753e+07	2.90185e+07	2.75674e+07
High	IsMasterProtein	Q9BXJ9	N-alpha-acetyltransferase 15, NatA auxiliary subunit OS=Homo sapiens OX=9606 GN=NAA15 PE=1 SV=1	0	FALSE	2.998	2	2	4	2	866	101.2	7.42	1.63	2	0	5.31679e+06	2.7634e+06	5.41121e+06
High	IsMasterProtein	Q96A49	Synapse-associated protein 1 OS=Homo sapiens OX=9606 GN=SYAP1 PE=1 SV=1	0	FALSE	2.987	4	2	3	2	352	39.9	4.53	0	2	0	5.05102e+06	4.62623e+06	4.65858e+06
High	IsMasterProtein	P62330	ADP-ribosylation factor 6 OS=Homo sapiens OX=9606 GN=ARF6 PE=1 SV=2	0	FALSE	2.863	9	2	3	1	175	20.1	8.95	6.15	2	0	2.94754e+06	2.69628e+06	2.59452e+06
High	IsMasterProtein	P62273	40S ribosomal protein S29 OS=Homo sapiens OX=9606 GN=RPS29 PE=1 SV=2	0	FALSE	2.81	27	2	4	2	56	6.7	10.13	0	2	0	1.87114e+07	1.68468e+07	1.70514e+07

## Sheet: s3_RTP1S-AirID
Protein FDR Confidence Combined	Master	Accession	Description	Exp q-value Combined	Contaminant	Sum PEP Score	Coverage in Percent	Number of Peptides	Number of PSMs	Number of Unique Peptides	Number of AAs	MW in kDa	calc pI	Score Sequest HT	Number of Peptides by Sequest HT	Number of Razor Peptides	Abundances Normalized Meas. 1	Abundances Normalized Meas. 2	Abundances Normalized Meas. 3
High	IsMasterProtein	P49327	Fatty acid synthase OS=Homo sapiens OX=9606 GN=FASN PE=1 SV=3	0	FALSE	761.528	53	94	384	93	2511	273.3	6.44	1324.15	94	1	2.24736e+09	2.38864e+09	2.25837e+09
High	IsMasterProtein	P11498	Pyruvate carboxylase, mitochondrial OS=Homo sapiens OX=9606 GN=PC PE=1 SV=2	0	FALSE	286.749	45	40	165	40	1178	129.6	6.84	549.09	40	0	8.17672e+08	8.46336e+08	8.2014e+08
High	IsMasterProtein	P50990	T-complex protein 1 subunit theta OS=Homo sapiens OX=9606 GN=CCT8 PE=1 SV=4	0	FALSE	231.641	65	33	155	33	548	59.6	5.6	449.63	33	0	1.97646e+09	1.9753e+09	1.9483e+09
High	IsMasterProtein	P14618	Pyruvate kinase PKM OS=Homo sapiens OX=9606 GN=PKM PE=1 SV=4	0	FALSE	221.894	54	23	99	23	531	57.9	7.84	383.28	23	0	5.27027e+08	5.19906e+08	5.2415e+08
High	IsMasterProtein	P0DMV9	Heat shock 70 kDa protein 1B OS=Homo sapiens OX=9606 GN=HSPA1B PE=1 SV=1	0	FALSE	221.24	50	25	135	17	641	70	5.66	450	25	8	1.19122e+09	1.1602e+09	1139554141
High	IsMasterProtein	P13639	Elongation factor 2 OS=Homo sapiens OX=9606 GN=EEF2 PE=1 SV=4	0	FALSE	219.97	45	32	149	31	858	95.3	6.83	448.81	32	1	7.64387e+08	7.64779e+08	7.55337e+08
High	IsMasterProtein	P68363	Tubulin alpha-1B chain OS=Homo sapiens OX=9606 GN=TUBA1B PE=1 SV=1	0	FALSE	218.211	61	22	165	3	451	50.1	5.06	569.84	22	20	1.70041e+09	1.66939e+09	1.6656e+09
High	IsMasterProtein	Q71U36	Tubulin alpha-1A chain OS=Homo sapiens OX=9606 GN=TUBA1A PE=1 SV=1	0	FALSE	209.129	61	22	142	3	451	50.1	5.06	498.95	22	0	3.13034e+07	3.09074e+07	31362038
High	IsMasterProtein	P07437	Tubulin beta chain OS=Homo sapiens OX=9606 GN=TUBB PE=1 SV=2	0	FALSE	205.025	60	19	179	5	444	49.6	4.89	584.69	19	0	2.04742e+08	1.94403e+08	2.00202e+08
High	IsMasterProtein	Q04637	Eukaryotic translation initiation factor 4 gamma 1 OS=Homo sapiens OX=9606 GN=EIF4G1 PE=1 SV=4	0	FALSE	200.906	23	31	110	30	1599	175.4	5.33	331.11	31	1	4.6046e+08	4.89059e+08	4.74478e+08
High	IsMasterProtein	P07900	Heat shock protein HSP 90-alpha OS=Homo sapiens OX=9606 GN=HSP90AA1 PE=1 SV=5	0	FALSE	198.453	42	28	152	19	732	84.6	5.02	431	28	0	4.55971e+08	4.42361e+08	4.33952e+08
High	IsMasterProtein	O75533	Splicing factor 3B subunit 1 OS=Homo sapiens OX=9606 GN=SF3B1 PE=1 SV=3	0	FALSE	182.839	26	25	90	25	1304	145.7	7.09	309.81	25	0	2.13698e+08	2.09854e+08	2.10905e+08
High	IsMasterProtein	P07814	Bifunctional glutamate/proline--tRNA ligase OS=Homo sapiens OX=9606 GN=EPRS PE=1 SV=5	0	FALSE	179.585	25	29	79	29	1512	170.5	7.33	249.73	29	0	1.9462e+08	1.96843e+08	1.98065e+08
High	IsMasterProtein	P78527	DNA-dependent protein kinase catalytic subunit OS=Homo sapiens OX=9606 GN=PRKDC PE=1 SV=3	0	FALSE	178.571	12	38	84	38	4128	468.8	7.12	233.85	38	0	1.4667e+08	1.46381e+08	1.42235e+08
High	IsMasterProtein	P08238	Heat shock protein HSP 90-beta OS=Homo sapiens OX=9606 GN=HSP90AB1 PE=1 SV=4	0	FALSE	176.891	44	30	148	20	724	83.2	5.03	411.1	30	12	1.49279e+09	1.50736e+09	1.51356e+09
High	IsMasterProtein	Q14697	Neutral alpha-glucosidase AB OS=Homo sapiens OX=9606 GN=GANAB PE=1 SV=3	0	FALSE	173.593	36	26	101	26	944	106.8	6.14	317.14	26	0	4.70995e+08	4.66649e+08	4.58771e+08
High	IsMasterProtein	P68371	Tubulin beta-4B chain OS=Homo sapiens OX=9606 GN=TUBB4B PE=1 SV=1	0	FALSE	171.179	60	19	150	1	445	49.8	4.89	485.75	19	23	1.31167e+09	1.29108e+09	1287271927
High	IsMasterProtein	P21333	Filamin-A OS=Homo sapiens OX=9606 GN=FLNA PE=1 SV=4	0	FALSE	156.637	14	29	82	29	2647	280.6	6.06	237.11	29	0	2.46056e+08	2.55046e+08	246015544
High	IsMasterProtein	P04843	Dolichyl-diphosphooligosaccharide--protein glycosyltransferase subunit 1 OS=Homo sapiens OX=9606 GN=RPN1 PE=1 SV=1	0	FALSE	156.203	45	19	82	19	607	68.5	6.38	303.64	19	0	3.96837e+08	3.88499e+08	385644653
High	IsMasterProtein	P11021	Endoplasmic reticulum chaperone BiP OS=Homo sapiens OX=9606 GN=HSPA5 PE=1 SV=2	0	FALSE	155.619	41	23	77	21	654	72.3	5.16	261.54	23	1	3.12011e+08	3.13687e+08	3.2322e+08
High	IsMasterProtein	P04350	Tubulin beta-4A chain OS=Homo sapiens OX=9606 GN=TUBB4A PE=1 SV=2	0	FALSE	153.055	56	17	136	2	444	49.6	4.88	437.47	17	0	5.68072e+06	5.20591e+06	5.98563e+06
High	IsMasterProtein	P61978	Heterogeneous nuclear ribonucleoprotein K OS=Homo sapiens OX=9606 GN=HNRNPK PE=1 SV=1	0	FALSE	150.939	49	17	101	17	463	50.9	5.54	325.22	17	0	6.9941e+08	6.99796e+08	6.59592e+08
High	IsMasterProtein	Q92616	eIF-2-alpha kinase activator GCN1 OS=Homo sapiens OX=9606 GN=GCN1 PE=1 SV=6	0	FALSE	150.508	14	24	64	24	2671	292.6	7.47	184.5	24	0	7.7587e+07	8.60687e+07	7.8798e+07
High	IsMasterProtein	P63244	Receptor of activated protein C kinase 1 OS=Homo sapiens OX=9606 GN=RACK1 PE=1 SV=3	0	FALSE	138.536	74	18	68	18	317	35.1	7.69	220.87	18	0	5.35511e+08	5.2804e+08	5.0546e+08
High	IsMasterProtein	P05165	Propionyl-CoA carboxylase alpha chain, mitochondrial OS=Homo sapiens OX=9606 GN=PCCA PE=1 SV=4	0	FALSE	138.237	42	24	79	24	728	80	7.52	236.92	24	0	3.74793e+08	3.88389e+08	3.67793e+08
High	IsMasterProtein	P30101	Protein disulfide-isomerase A3 OS=Homo sapiens OX=9606 GN=PDIA3 PE=1 SV=4	0	FALSE	136.146	42	19	63	19	505	56.7	6.35	210.32	19	0	4.18804e+08	4.16603e+08	4.13078e+08
High	IsMasterProtein	P42167	Lamina-associated polypeptide 2, isoforms beta/gamma OS=Homo sapiens OX=9606 GN=TMPO PE=1 SV=2	0	FALSE	135.943	48	14	83	14	454	50.6	9.38	278.61	14	0	8.49758e+08	8.65393e+08	816947787
High	IsMasterProtein	P22102	Trifunctional purine biosynthetic protein adenosine-3 OS=Homo sapiens OX=9606 GN=GART PE=1 SV=1	0	FALSE	132.125	28	23	78	23	1010	107.7	6.7	240.22	23	0	3.10907e+08	3.09394e+08	2.90693e+08
High	IsMasterProtein	Q9NYU2	UDP-glucose:glycoprotein glucosyltransferase 1 OS=Homo sapiens OX=9606 GN=UGGT1 PE=1 SV=3	0	FALSE	128.926	25	29	80	29	1555	177.1	5.63	224.99	29	0	1.95112e+08	2.02204e+08	1.95846e+08
High	IsMasterProtein	Q08211	ATP-dependent RNA helicase A OS=Homo sapiens OX=9606 GN=DHX9 PE=1 SV=4	0	FALSE	128.466	22	23	65	23	1270	140.9	6.84	196.08	23	0	1.58059e+08	1.5359e+08	1.50521e+08
High	IsMasterProtein	P14625	Endoplasmin OS=Homo sapiens OX=9606 GN=HSP90B1 PE=1 SV=1	0	FALSE	127.956	31	21	78	20	803	92.4	4.84	216.08	21	0	3.80967e+08	3.93032e+08	3.93381e+08
High	IsMasterProtein	Q96A33	Coiled-coil domain-containing protein 47 OS=Homo sapiens OX=9606 GN=CCDC47 PE=1 SV=1	0	FALSE	123.627	32	17	92	17	483	55.8	4.87	303.89	17	0	9.58619e+08	9.72579e+08	9.40264e+08
High	IsMasterProtein	Q13162	Peroxiredoxin-4 OS=Homo sapiens OX=9606 GN=PRDX4 PE=1 SV=1	0	FALSE	123.517	61	12	57	11	271	30.5	6.29	217.48	12	1	3.11677e+08	3.16362e+08	313874847
High	IsMasterProtein	P11142	Heat shock cognate 71 kDa protein OS=Homo sapiens OX=9606 GN=HSPA8 PE=1 SV=1	0	FALSE	122.656	32	15	63	12	646	70.9	5.52	211.99	15	0	1.96655e+08	1.95795e+08	193771807
High	IsMasterProtein	P68104	Elongation factor 1-alpha 1 OS=Homo sapiens OX=9606 GN=EEF1A1 PE=1 SV=1	0	FALSE	121.094	37	12	68	12	462	50.1	9.01	244.57	12	0	8.4134e+08	8.50256e+08	7.85509e+08
High	IsMasterProtein	P07195	L-lactate dehydrogenase B chain OS=Homo sapiens OX=9606 GN=LDHB PE=1 SV=2	0	FALSE	121.042	44	14	91	13	334	36.6	6.05	235.73	14	0	7.21132e+08	7.189e+08	7.11453e+08
High	IsMasterProtein	P27824	Calnexin OS=Homo sapiens OX=9606 GN=CANX PE=1 SV=2	0	FALSE	120.587	37	19	83	18	592	67.5	4.6	258.28	19	1	7.35833e+08	7.19377e+08	7.12994e+08
High	IsMasterProtein	Q00610	Clathrin heavy chain 1 OS=Homo sapiens OX=9606 GN=CLTC PE=1 SV=5	0	FALSE	116.055	17	22	51	22	1675	191.5	5.69	159.26	22	0	8.86184e+07	8.60991e+07	8.1738e+07
High	IsMasterProtein	P17987	T-complex protein 1 subunit alpha OS=Homo sapiens OX=9606 GN=TCP1 PE=1 SV=1	0	FALSE	110.122	43	19	61	19	556	60.3	6.11	184.6	19	0	2.84525e+08	2.89007e+08	2.8318e+08
High	IsMasterProtein	P04406	Glyceraldehyde-3-phosphate dehydrogenase OS=Homo sapiens OX=9606 GN=GAPDH PE=1 SV=3	0	FALSE	109.589	44	11	81	11	335	36	8.46	278.94	11	0	6.31933e+08	6.59717e+08	669521203
High	IsMasterProtein	P09651	Heterogeneous nuclear ribonucleoprotein A1 OS=Homo sapiens OX=9606 GN=HNRNPA1 PE=1 SV=5	0	FALSE	109.136	37	12	61	11	372	38.7	9.13	206.4	12	1	2.56353e+08	2.46674e+08	2.41661e+08
High	IsMasterProtein	P31939	Bifunctional purine biosynthesis protein PURH OS=Homo sapiens OX=9606 GN=ATIC PE=1 SV=3	0	FALSE	108.732	38	14	48	14	592	64.6	6.71	162.82	14	0	1.19876e+08	1.17611e+08	1.23894e+08
High	IsMasterProtein	Q9Y383	Putative RNA-binding protein Luc7-like 2 OS=Homo sapiens OX=9606 GN=LUC7L2 PE=1 SV=2	0	FALSE	107.015	35	13	50	8	392	46.5	10.01	177.65	13	5	3.3683e+08	3.18944e+08	306476118
High	IsMasterProtein	P00338	L-lactate dehydrogenase A chain OS=Homo sapiens OX=9606 GN=LDHA PE=1 SV=2	0	FALSE	102.065	72	19	86	18	332	36.7	8.27	218.12	19	1	1.02096e+09	9.9094e+08	1.01721e+09
High	IsMasterProtein	P84103	Serine/arginine-rich splicing factor 3 OS=Homo sapiens OX=9606 GN=SRSF3 PE=1 SV=1	0	FALSE	101.742	48	10	84	9	164	19.3	11.65	248.21	10	1	5.81136e+08	5.8985e+08	5.87497e+08
High	IsMasterProtein	P25705	ATP synthase subunit alpha, mitochondrial OS=Homo sapiens OX=9606 GN=ATP5F1A PE=1 SV=1	0	FALSE	100.362	33	14	49	14	553	59.7	9.13	151.92	14	0	2.81021e+08	2.77364e+08	268705126
High	IsMasterProtein	Q96RQ3	Methylcrotonoyl-CoA carboxylase subunit alpha, mitochondrial OS=Homo sapiens OX=9606 GN=MCCC1 PE=1 SV=3	0	FALSE	96.489	29	16	55	16	725	80.4	7.78	167.03	16	0	2.83961e+08	2.81121e+08	2.79716e+08
High	IsMasterProtein	P22234	Multifunctional protein ADE2 OS=Homo sapiens OX=9606 GN=PAICS PE=1 SV=3	0	FALSE	95.664	50	17	56	17	425	47	7.23	154.85	17	0	2.12708e+08	2.11676e+08	2.10967e+08
High	IsMasterProtein	O60884	DnaJ homolog subfamily A member 2 OS=Homo sapiens OX=9606 GN=DNAJA2 PE=1 SV=1	0	FALSE	94.8	43	13	58	13	412	45.7	6.48	163.45	13	0	1.97595e+08	2.02137e+08	1.96185e+08
High	IsMasterProtein	O75534	Cold shock domain-containing protein E1 OS=Homo sapiens OX=9606 GN=CSDE1 PE=1 SV=2	0	FALSE	92.939	27	18	60	18	798	88.8	6.25	171.73	18	0	1.79795e+08	1.74546e+08	1.73497e+08
High	IsMasterProtein	P04844	Dolichyl-diphosphooligosaccharide--protein glycosyltransferase subunit 2 OS=Homo sapiens OX=9606 GN=RPN2 PE=1 SV=3	0	FALSE	92.911	29	10	34	10	631	69.2	5.69	132.23	10	0	8.00974e+07	7.62386e+07	7.81215e+07
High	IsMasterProtein	P51610	Host cell factor 1 OS=Homo sapiens OX=9606 GN=HCFC1 PE=1 SV=2	0	FALSE	91.214	10	16	47	16	2035	208.6	7.46	142.44	16	0	1.6959e+08	1.79999e+08	1.82724e+08
High	IsMasterProtein	Q14974	Importin subunit beta-1 OS=Homo sapiens OX=9606 GN=KPNB1 PE=1 SV=2	0	FALSE	91.033	23	15	43	15	876	97.1	4.78	129.23	15	0	9.06452e+07	8.89449e+07	8.43929e+07
High	IsMasterProtein	O00571	ATP-dependent RNA helicase DDX3X OS=Homo sapiens OX=9606 GN=DDX3X PE=1 SV=3	0	FALSE	90.627	30	15	54	15	662	73.2	7.18	188.31	15	0	2.18232e+08	2.23519e+08	217597331
High	IsMasterProtein	Q00839	Heterogeneous nuclear ribonucleoprotein U OS=Homo sapiens OX=9606 GN=HNRNPU PE=1 SV=6	0	FALSE	88.988	21	13	44	13	825	90.5	6	149.38	13	0	1.75012e+08	1.80955e+08	1.64886e+08
High	IsMasterProtein	P80303	Nucleobindin-2 OS=Homo sapiens OX=9606 GN=NUCB2 PE=1 SV=3	0	FALSE	88.802	31	9	36	9	420	50.2	5.12	144.35	9	0	1.74059e+08	1.77243e+08	1.75707e+08
High	IsMasterProtein	Q99832	T-complex protein 1 subunit eta OS=Homo sapiens OX=9606 GN=CCT7 PE=1 SV=2	0	FALSE	87.059	37	13	41	13	543	59.3	7.65	132.78	13	0	1.04123e+08	2.30403e+08	202632856
High	IsMasterProtein	P49368	T-complex protein 1 subunit gamma OS=Homo sapiens OX=9606 GN=CCT3 PE=1 SV=4	0	FALSE	86.009	39	16	52	16	545	60.5	6.49	152.57	16	0	3.8963e+08	3.99923e+08	3.79087e+08
High	IsMasterProtein	P50454	Serpin H1 OS=Homo sapiens OX=9606 GN=SERPINH1 PE=1 SV=2	0	FALSE	84.749	34	9	32	9	418	46.4	8.69	129.28	9	0	8.99894e+07	8.58586e+07	8.89033e+07
High	IsMasterProtein	P06493	Cyclin-dependent kinase 1 OS=Homo sapiens OX=9606 GN=CDK1 PE=1 SV=3	0	FALSE	83.736	46	12	46	11	297	34.1	8.4	138.26	12	1	1.6184e+08	1.65468e+08	1.66393e+08
High	IsMasterProtein	P34931	Heat shock 70 kDa protein 1-like OS=Homo sapiens OX=9606 GN=HSPA1L PE=1 SV=2	0	FALSE	83.501	24	10	44	1	641	70.3	6.02	154.65	10	0	4.16346e+06	4.23852e+06	3.58227e+06
High	IsMasterProtein	P48643	T-complex protein 1 subunit epsilon OS=Homo sapiens OX=9606 GN=CCT5 PE=1 SV=1	0	FALSE	82.606	35	15	47	15	541	59.6	5.66	128.46	15	0	1.29324e+08	1.29781e+08	1.22457e+08
High	IsMasterProtein	P59025	Receptor-transporting protein 1 OS=Homo sapiens OX=9606 GN=RTP1 PE=2 SV=2	0	FALSE	82.568	21	5	101	5	263	30.9	7.81	342.75	5	0	3.11493e+09	3.0322e+09	3157776122
High	IsMasterProtein	P22314	Ubiquitin-like modifier-activating enzyme 1 OS=Homo sapiens OX=9606 GN=UBA1 PE=1 SV=3	0	FALSE	80.196	18	13	37	13	1058	117.8	5.76	116.02	13	0	8.17837e+07	8.39835e+07	8.18145e+07
High	IsMasterProtein	P37802	Transgelin-2 OS=Homo sapiens OX=9606 GN=TAGLN2 PE=1 SV=3	0	FALSE	79.579	61	10	49	10	199	22.4	8.25	161.85	10	0	9.34014e+07	9.35626e+07	9.82392e+07
High	IsMasterProtein	P68133	Actin, alpha skeletal muscle OS=Homo sapiens OX=9606 GN=ACTA1 PE=1 SV=1	0	FALSE	78.855	29	11	89	1	377	42	5.39	216.65	11	0	5.93811e+06	6.69429e+06	6199113
High	IsMasterProtein	P23396	40S ribosomal protein S3 OS=Homo sapiens OX=9606 GN=RPS3 PE=1 SV=2	0	FALSE	77.34	64	16	62	16	243	26.7	9.66	176.02	16	0	3.36054e+08	3.46351e+08	3.30491e+08
High	IsMasterProtein	Q14498	RNA-binding protein 39 OS=Homo sapiens OX=9606 GN=RBM39 PE=1 SV=2	0	FALSE	75.838	27	10	30	10	530	59.3	10.1	96.08	10	0	1.1605e+08	1.21626e+08	1.23617e+08
High	IsMasterProtein	P06737	Glycogen phosphorylase, liver form OS=Homo sapiens OX=9606 GN=PYGL PE=1 SV=4	0	FALSE	75.496	21	16	44	16	847	97.1	7.17	122.32	16	0	9.54236e+07	9.68002e+07	1.04128e+08
High	IsMasterProtein	P46060	Ran GTPase-activating protein 1 OS=Homo sapiens OX=9606 GN=RANGAP1 PE=1 SV=1	0	FALSE	75.421	26	13	34	13	587	63.5	4.68	105.8	13	0	1.22278e+08	1.29424e+08	1.20342e+08
High	IsMasterProtein	O14654	Insulin receptor substrate 4 OS=Homo sapiens OX=9606 GN=IRS4 PE=1 SV=1	0	FALSE	75.345	12	10	28	10	1257	133.7	8.44	104.88	10	0	4.5137e+07	3.77438e+07	4.33962e+07
High	IsMasterProtein	P05388	60S acidic ribosomal protein P0 OS=Homo sapiens OX=9606 GN=RPLP0 PE=1 SV=1	0	FALSE	75.115	50	11	42	11	317	34.3	5.97	147.56	11	0	1.87637e+08	1.98743e+08	1.82956e+08
High	IsMasterProtein	P60842	Eukaryotic initiation factor 4A-I OS=Homo sapiens OX=9606 GN=EIF4A1 PE=1 SV=1	0	FALSE	75.03	40	16	58	14	406	46.1	5.48	158.8	16	2	3.95934e+08	3.81245e+08	3.77926e+08
High	IsMasterProtein	P08670	Vimentin OS=Homo sapiens OX=9606 GN=VIM PE=1 SV=4	0	FALSE	74.954	29	12	43	11	466	53.6	5.12	126.91	12	1	1.90015e+08	1.92389e+08	1.80681e+08
High	IsMasterProtein	Q14204	Cytoplasmic dynein 1 heavy chain 1 OS=Homo sapiens OX=9606 GN=DYNC1H1 PE=1 SV=5	0	FALSE	74.712	5	18	34	18	4646	532.1	6.4	82.93	18	0	5.55567e+07	5.47897e+07	5.65423e+07
High	IsMasterProtein	P62826	GTP-binding nuclear protein Ran OS=Homo sapiens OX=9606 GN=RAN PE=1 SV=3	0	FALSE	74.008	38	11	49	11	216	24.4	7.49	155.79	11	0	5.499e+08	5.57265e+08	5.45999e+08
High	IsMasterProtein	P46782	40S ribosomal protein S5 OS=Homo sapiens OX=9606 GN=RPS5 PE=1 SV=4	0	FALSE	73.897	48	8	25	8	204	22.9	9.72	99.98	8	0	9.7833e+07	9.70495e+07	9.63087e+07
High	IsMasterProtein	P04075	Fructose-bisphosphate aldolase A OS=Homo sapiens OX=9606 GN=ALDOA PE=1 SV=2	0	FALSE	73.833	37	11	35	11	364	39.4	8.09	118.67	11	0	1.99128e+08	1.85156e+08	168043124
High	IsMasterProtein	P26641	Elongation factor 1-gamma OS=Homo sapiens OX=9606 GN=EEF1G PE=1 SV=3	0	FALSE	72.948	35	13	40	13	437	50.1	6.67	122.79	13	0	1.19046e+08	1.22048e+08	118751199
High	IsMasterProtein	P27797	Calreticulin OS=Homo sapiens OX=9606 GN=CALR PE=1 SV=1	0	FALSE	72.337	35	10	45	10	417	48.1	4.44	122.93	10	0	1.84349e+08	1.97897e+08	196003097
High	IsMasterProtein	P31689	DnaJ homolog subfamily A member 1 OS=Homo sapiens OX=9606 GN=DNAJA1 PE=1 SV=2	0	FALSE	71.62	35	10	35	10	397	44.8	7.08	117.37	10	0	8.87428e+07	9.62475e+07	9.24884e+07
High	IsMasterProtein	P40227	T-complex protein 1 subunit zeta OS=Homo sapiens OX=9606 GN=CCT6A PE=1 SV=3	0	FALSE	70.993	29	12	40	12	531	58	6.68	125.3	12	0	1.01242e+08	9.49208e+07	9.86109e+07
High	IsMasterProtein	Q15233	Non-POU domain-containing octamer-binding protein OS=Homo sapiens OX=9606 GN=NONO PE=1 SV=4	0	FALSE	70.713	31	13	52	12	471	54.2	8.95	138.23	13	1	4.46832e+08	4.50367e+08	4.60547e+08
High	IsMasterProtein	Q9BYX7	Putative beta-actin-like protein 3 OS=Homo sapiens OX=9606 GN=POTEKP PE=5 SV=1	0	FALSE	70.117	19	5	52	1	375	42	6.33	158.63	5	0	1.84371e+07	1.32909e+07	1.16158e+07
High	IsMasterProtein	P50991	T-complex protein 1 subunit delta OS=Homo sapiens OX=9606 GN=CCT4 PE=1 SV=4	0	FALSE	68.743	26	13	37	13	539	57.9	7.83	108.68	13	0	1.32001e+08	1.43762e+08	142535357
High	IsMasterProtein	Q7KZF4	Staphylococcal nuclease domain-containing protein 1 OS=Homo sapiens OX=9606 GN=SND1 PE=1 SV=1	0	FALSE	67.531	20	11	24	11	910	101.9	7.17	66.98	11	0	5.14001e+07	5.75334e+07	5.61212e+07
High	IsMasterProtein	P35232	Prohibitin OS=Homo sapiens OX=9606 GN=PHB PE=1 SV=1	0	FALSE	66.945	59	10	30	10	272	29.8	5.76	117.17	10	0	7.52177e+07	7.48875e+07	7.45388e+07
High	IsMasterProtein	P23588	Eukaryotic translation initiation factor 4B OS=Homo sapiens OX=9606 GN=EIF4B PE=1 SV=2	0	FALSE	66.476	20	9	34	9	611	69.1	5.73	113.22	9	0	8.46682e+07	9.02585e+07	9.04184e+07
High	IsMasterProtein	Q9Y4L1	Hypoxia up-regulated protein 1 OS=Homo sapiens OX=9606 GN=HYOU1 PE=1 SV=1	0	FALSE	66.322	20	13	31	13	999	111.3	5.22	95.98	13	0	7.94463e+07	8.23331e+07	8.30579e+07
High	IsMasterProtein	P53621	Coatomer subunit alpha OS=Homo sapiens OX=9606 GN=COPA PE=1 SV=2	0	FALSE	64.68	17	18	38	18	1224	138.3	7.66	105.23	18	0	9.89007e+07	1.00565e+08	1.00219e+08
High	IsMasterProtein	P13667	Protein disulfide-isomerase A4 OS=Homo sapiens OX=9606 GN=PDIA4 PE=1 SV=2	0	FALSE	64.369	29	16	51	16	645	72.9	5.07	118.28	16	0	2.45881e+08	2.45823e+08	2.42167e+08
High	IsMasterProtein	Q9NQ29	Putative RNA-binding protein Luc7-like 1 OS=Homo sapiens OX=9606 GN=LUC7L PE=1 SV=1	0	FALSE	64.305	20	7	32	2	371	43.7	9.92	112.94	7	0	5.03601e+07	4.7693e+07	4.67182e+07
High	IsMasterProtein	P13010	X-ray repair cross-complementing protein 5 OS=Homo sapiens OX=9606 GN=XRCC5 PE=1 SV=3	0	FALSE	62.622	23	13	39	13	732	82.7	5.81	107.5	13	0	1.13324e+08	1.13615e+08	1.08068e+08
High	IsMasterProtein	P11586	C-1-tetrahydrofolate synthase, cytoplasmic OS=Homo sapiens OX=9606 GN=MTHFD1 PE=1 SV=3	0	FALSE	62.3	19	14	31	14	935	101.5	7.3	89.67	14	0	1.59122e+08	1.51177e+08	1.58776e+08
High	IsMasterProtein	O43175	D-3-phosphoglycerate dehydrogenase OS=Homo sapiens OX=9606 GN=PHGDH PE=1 SV=4	0	FALSE	60.966	25	10	36	10	533	56.6	6.71	95.83	10	0	1.32494e+08	1.37392e+08	1.27708e+08
High	IsMasterProtein	P04637	Cellular tumor antigen p53 OS=Homo sapiens OX=9606 GN=TP53 PE=1 SV=4	0	FALSE	60.71	28	8	28	8	393	43.6	6.79	103.08	8	0	9.46673e+07	9.59802e+07	97928621
High	IsMasterProtein	P62258	14-3-3 protein epsilon OS=Homo sapiens OX=9606 GN=YWHAE PE=1 SV=1	0	FALSE	60.49	42	10	42	8	255	29.2	4.74	106.08	10	2	2.5117e+08	2.6399e+08	247718361
High	IsMasterProtein	Q92598	Heat shock protein 105 kDa OS=Homo sapiens OX=9606 GN=HSPH1 PE=1 SV=1	0	FALSE	60.26	16	10	23	9	858	96.8	5.39	71.59	10	1	4.32049e+07	5.34569e+07	5.45033e+07
High	IsMasterProtein	Q96D71	RalBP1-associated Eps domain-containing protein 1 OS=Homo sapiens OX=9606 GN=REPS1 PE=1 SV=3	0	FALSE	59.578	18	9	25	9	796	86.6	5.69	87.06	9	0	4.05915e+07	4.24864e+07	4.33255e+07
High	IsMasterProtein	P46108	Adapter molecule crk OS=Homo sapiens OX=9606 GN=CRK PE=1 SV=2	0	FALSE	58.924	46	10	29	2	304	33.8	5.55	108.06	10	9	1.18728e+08	1.2576e+08	1.20122e+08
High	IsMasterProtein	Q16630	Cleavage and polyadenylation specificity factor subunit 6 OS=Homo sapiens OX=9606 GN=CPSF6 PE=1 SV=2	0	FALSE	57.932	13	4	22	4	551	59.2	7.15	94.31	4	0	7.99572e+07	7.61108e+07	76524312
High	IsMasterProtein	P46108-2	Isoform Crk-I of Adapter molecule crk OS=Homo sapiens OX=9606 GN=CRK	0	FALSE	57.252	66	9	27	1	204	22.9	5.48	101.28	9	0	8.22846e+06	7.75492e+06	7.97788e+06
High	IsMasterProtein	P06733	Alpha-enolase OS=Homo sapiens OX=9606 GN=ENO1 PE=1 SV=2	0	FALSE	56.196	32	11	28	11	434	47.1	7.39	87.19	11	0	8.98595e+07	8.9527e+07	8.62113e+07
High	IsMasterProtein	P55060	Exportin-2 OS=Homo sapiens OX=9606 GN=CSE1L PE=1 SV=3	0	FALSE	55.908	12	8	23	8	971	110.3	5.77	72.48	8	0	3.3802e+07	3.51465e+07	3.31896e+07
High	IsMasterProtein	P61204	ADP-ribosylation factor 3 OS=Homo sapiens OX=9606 GN=ARF3 PE=1 SV=2	0	FALSE	55.792	62	9	33	4	181	20.6	7.43	89.09	9	5	2.12002e+08	2.11522e+08	2.2338e+08
High	IsMasterProtein	P34932	Heat shock 70 kDa protein 4 OS=Homo sapiens OX=9606 GN=HSPA4 PE=1 SV=4	0	FALSE	55.712	18	10	29	10	840	94.3	5.19	85.74	10	0	5.10642e+07	5.21047e+07	5.30459e+07
High	IsMasterProtein	P45880	Voltage-dependent anion-selective channel protein 2 OS=Homo sapiens OX=9606 GN=VDAC2 PE=1 SV=2	0	FALSE	55.376	40	8	27	8	294	31.5	7.56	92.6	8	0	1.21186e+08	1.17383e+08	122305609
High	IsMasterProtein	Q9P258	Protein RCC2 OS=Homo sapiens OX=9606 GN=RCC2 PE=1 SV=2	0	FALSE	55.214	21	8	18	8	522	56	8.78	63.11	8	0	5.67351e+07	4.75301e+07	4.81389e+07
High	IsMasterProtein	O95373	Importin-7 OS=Homo sapiens OX=9606 GN=IPO7 PE=1 SV=1	0	FALSE	53.837	12	10	25	10	1038	119.4	4.82	85.98	10	0	4.15236e+07	4.60462e+07	4.49181e+07
High	IsMasterProtein	P04181	Ornithine aminotransferase, mitochondrial OS=Homo sapiens OX=9606 GN=OAT PE=1 SV=1	0	FALSE	53.807	33	10	26	10	439	48.5	7.03	83.44	10	0	6.77295e+07	6.9796e+07	6.82544e+07
High	IsMasterProtein	Q6P2Q9	Pre-mRNA-processing-splicing factor 8 OS=Homo sapiens OX=9606 GN=PRPF8 PE=1 SV=2	0	FALSE	53.043	7	13	30	13	2335	273.4	8.84	80.86	13	0	2.9598e+08	2.63829e+08	2.70522e+08
High	IsMasterProtein	P06744	Glucose-6-phosphate isomerase OS=Homo sapiens OX=9606 GN=GPI PE=1 SV=4	0	FALSE	52.949	26	10	28	10	558	63.1	8.32	81.99	10	0	9.96285e+07	9.72038e+07	8.28191e+07
High	IsMasterProtein	P07237	Protein disulfide-isomerase OS=Homo sapiens OX=9606 GN=P4HB PE=1 SV=3	0	FALSE	51.88	28	12	31	12	508	57.1	4.87	77.06	12	0	8.42682e+07	8.21589e+07	87695730
High	IsMasterProtein	P18669	Phosphoglycerate mutase 1 OS=Homo sapiens OX=9606 GN=PGAM1 PE=1 SV=2	0	FALSE	51.434	32	6	28	6	254	28.8	7.18	87.5	6	0	1.27269e+08	1.32965e+08	1.34922e+08
High	IsMasterProtein	P35658	Nuclear pore complex protein Nup214 OS=Homo sapiens OX=9606 GN=NUP214 PE=1 SV=2	0	FALSE	50.709	7	8	22	8	2090	213.5	7.47	75.01	8	0	4.35707e+07	4.42334e+07	3.93363e+07
High	IsMasterProtein	P46109	Crk-like protein OS=Homo sapiens OX=9606 GN=CRKL PE=1 SV=1	0	FALSE	50.599	31	7	29	7	303	33.8	6.74	105.64	7	0	1.21219e+08	1.2482e+08	1.30134e+08
High	IsMasterProtein	P35579	Myosin-9 OS=Homo sapiens OX=9606 GN=MYH9 PE=1 SV=4	0	FALSE	50.598	6	11	32	11	1960	226.4	5.6	92.46	11	0	7.08811e+07	7.04315e+07	68839570
High	IsMasterProtein	Q15366	Poly(rC)-binding protein 2 OS=Homo sapiens OX=9606 GN=PCBP2 PE=1 SV=1	0	FALSE	50.485	24	6	28	5	365	38.6	6.79	94.82	6	0	1.70133e+08	1.85888e+08	1.77349e+08
High	IsMasterProtein	Q00341	Vigilin OS=Homo sapiens OX=9606 GN=HDLBP PE=1 SV=2	0	FALSE	50.401	14	12	25	12	1268	141.4	6.87	70.04	12	0	5.97622e+07	5.87221e+07	59796509
High	IsMasterProtein	P52209	6-phosphogluconate dehydrogenase, decarboxylating OS=Homo sapiens OX=9606 GN=PGD PE=1 SV=3	0	FALSE	50.355	33	10	26	10	483	53.1	7.23	79.62	10	0	5.06751e+07	5.23637e+07	4.82842e+07
High	IsMasterProtein	P63104	14-3-3 protein zeta/delta OS=Homo sapiens OX=9606 GN=YWHAZ PE=1 SV=1	0	FALSE	49.673	39	8	37	5	245	27.7	4.79	97.61	8	1	5.71781e+07	1.08164e+08	9.79945e+07
High	IsMasterProtein	P19338	Nucleolin OS=Homo sapiens OX=9606 GN=NCL PE=1 SV=3	0	FALSE	48.709	16	9	33	9	710	76.6	4.7	84.79	9	0	1.26554e+08	1.26086e+08	1.20413e+08
High	IsMasterProtein	P41252	Isoleucine--tRNA ligase, cytoplasmic OS=Homo sapiens OX=9606 GN=IARS PE=1 SV=2	0	FALSE	48.268	10	10	27	10	1262	144.4	6.15	75.89	10	0	5.26057e+07	6.07579e+07	5.18766e+07
High	IsMasterProtein	Q13838	Spliceosome RNA helicase DDX39B OS=Homo sapiens OX=9606 GN=DDX39B PE=1 SV=1	0	FALSE	48.094	24	9	27	9	428	49	5.67	77.43	9	0	8.49145e+07	8.2078e+07	7.9775e+07
High	IsMasterProtein	Q14257	Reticulocalbin-2 OS=Homo sapiens OX=9606 GN=RCN2 PE=1 SV=1	0	FALSE	47.441	32	7	18	7	317	36.9	4.4	65.41	7	0	4.98706e+07	4.90067e+07	4.96994e+07
High	IsMasterProtein	P13674	Prolyl 4-hydroxylase subunit alpha-1 OS=Homo sapiens OX=9606 GN=P4HA1 PE=1 SV=2	0	FALSE	46.832	23	9	26	9	534	61	6.01	80.86	9	0	6.40737e+07	5.99603e+07	6.00966e+07
High	IsMasterProtein	Q6Y7W6	GRB10-interacting GYF protein 2 OS=Homo sapiens OX=9606 GN=GIGYF2 PE=1 SV=1	0	FALSE	46.506	8	7	17	7	1299	150	5.54	62.8	7	0	4.58385e+07	4.2035e+07	4.68072e+07
High	IsMasterProtein	P53618	Coatomer subunit beta OS=Homo sapiens OX=9606 GN=COPB1 PE=1 SV=3	0	FALSE	46.314	14	10	22	10	953	107.1	6.05	70.51	10	0	3.95921e+07	4.9099e+07	4.00489e+07
High	IsMasterProtein	P39656	Dolichyl-diphosphooligosaccharide--protein glycosyltransferase 48 kDa subunit OS=Homo sapiens OX=9606 GN=DDOST PE=1 SV=4	0	FALSE	45.875	27	10	33	10	456	50.8	6.55	72.74	10	0	1.40606e+08	1.42766e+08	1.38557e+08
High	IsMasterProtein	O43852	Calumenin OS=Homo sapiens OX=9606 GN=CALU PE=1 SV=2	0	FALSE	45.634	34	7	20	7	315	37.1	4.64	75.94	7	0	6.59002e+07	7.00493e+07	5.43759e+07
High	IsMasterProtein	Q99873	Protein arginine N-methyltransferase 1 OS=Homo sapiens OX=9606 GN=PRMT1 PE=1 SV=3	0	FALSE	45.119	38	11	20	11	371	42.4	5.35	54.28	11	0	5.92933e+07	6.45432e+07	5.46411e+07
High	IsMasterProtein	P34897	Serine hydroxymethyltransferase, mitochondrial OS=Homo sapiens OX=9606 GN=SHMT2 PE=1 SV=3	0	FALSE	45.072	23	10	31	10	504	56	8.53	88.94	10	0	1.63146e+08	1.67563e+08	1.67857e+08
High	IsMasterProtein	P50395	Rab GDP dissociation inhibitor beta OS=Homo sapiens OX=9606 GN=GDI2 PE=1 SV=2	0	FALSE	45	25	8	22	8	445	50.6	6.47	61.16	8	0	4.22404e+07	4.2654e+07	4.39366e+07
High	IsMasterProtein	Q9NZI8	Insulin-like growth factor 2 mRNA-binding protein 1 OS=Homo sapiens OX=9606 GN=IGF2BP1 PE=1 SV=2	0	FALSE	44.956	17	7	21	7	577	63.4	9.2	75.75	7	0	5.83464e+07	5.4908e+07	5.41783e+07
High	IsMasterProtein	P30050	60S ribosomal protein L12 OS=Homo sapiens OX=9606 GN=RPL12 PE=1 SV=1	0	FALSE	44.937	49	5	16	5	165	17.8	9.42	55.53	5	0	5.6848e+07	5.29805e+07	5.79381e+07
High	IsMasterProtein	O43765	Small glutamine-rich tetratricopeptide repeat-containing protein alpha OS=Homo sapiens OX=9606 GN=SGTA PE=1 SV=1	0	FALSE	44.782	28	8	22	8	313	34	4.87	71.95	8	0	5.62313e+07	5.77553e+07	5.70685e+07
High	IsMasterProtein	P17812	CTP synthase 1 OS=Homo sapiens OX=9606 GN=CTPS1 PE=1 SV=2	0	FALSE	44.709	17	9	23	9	591	66.6	6.46	58.65	9	0	6.72907e+07	6.7981e+07	5.36231e+07
High	IsMasterProtein	P78344	Eukaryotic translation initiation factor 4 gamma 2 OS=Homo sapiens OX=9606 GN=EIF4G2 PE=1 SV=1	0	FALSE	44.636	14	12	33	12	907	102.3	7.14	70.96	12	0	7.78574e+07	7.31883e+07	7.67044e+07
High	IsMasterProtein	P14868	Aspartate--tRNA ligase, cytoplasmic OS=Homo sapiens OX=9606 GN=DARS PE=1 SV=2	0	FALSE	43.976	27	11	26	11	501	57.1	6.55	68.46	11	0	8.89883e+07	8.9584e+07	8.75221e+07
High	IsMasterProtein	Q9Y5M8	Signal recognition particle receptor subunit beta OS=Homo sapiens OX=9606 GN=SRPRB PE=1 SV=3	0	FALSE	43.907	36	9	25	9	271	29.7	9.04	74.01	9	0	8.98709e+07	8.92741e+07	8.50414e+07
High	IsMasterProtein	Q8TCJ2	Dolichyl-diphosphooligosaccharide--protein glycosyltransferase subunit STT3B OS=Homo sapiens OX=9606 GN=STT3B PE=1 SV=1	0	FALSE	43.69	12	8	26	7	826	93.6	8.91	76.06	8	1	4.64597e+07	4.39515e+07	4.79421e+07
High	IsMasterProtein	P49257	Protein ERGIC-53 OS=Homo sapiens OX=9606 GN=LMAN1 PE=1 SV=2	0	FALSE	43.658	24	8	24	8	510	57.5	6.77	71.28	8	0	7.53235e+07	7.75482e+07	7.67854e+07
High	IsMasterProtein	Q6PKG0	La-related protein 1 OS=Homo sapiens OX=9606 GN=LARP1 PE=1 SV=2	0	FALSE	43.497	7	6	18	6	1096	123.4	8.82	56.45	6	0	1.75639e+07	1.84261e+07	1.5129e+07
High	IsMasterProtein	Q8N766	ER membrane protein complex subunit 1 OS=Homo sapiens OX=9606 GN=EMC1 PE=1 SV=1	0	FALSE	43.436	10	8	20	8	993	111.7	7.66	61.3	8	0	2.49221e+07	2.52821e+07	2.67025e+07
High	IsMasterProtein	Q14739	Delta(14)-sterol reductase LBR OS=Homo sapiens OX=9606 GN=LBR PE=1 SV=2	0	FALSE	43.174	17	9	26	9	615	70.7	9.36	75.27	9	0	1.79815e+08	1.91728e+08	1.90701e+08
High	IsMasterProtein	P54577	Tyrosine--tRNA ligase, cytoplasmic OS=Homo sapiens OX=9606 GN=YARS PE=1 SV=4	0	FALSE	43.07	26	12	26	12	528	59.1	7.05	69.44	12	0	7.55066e+07	7.38363e+07	7.15781e+07
High	IsMasterProtein	P17844	Probable ATP-dependent RNA helicase DDX5 OS=Homo sapiens OX=9606 GN=DDX5 PE=1 SV=1	0	FALSE	42.949	22	13	38	9	614	69.1	8.92	78.92	13	4	1.33836e+08	1.35577e+08	132503442
High	IsMasterProtein	P28288	ATP-binding cassette sub-family D member 3 OS=Homo sapiens OX=9606 GN=ABCD3 PE=1 SV=1	0	FALSE	42.768	15	7	17	7	659	75.4	9.36	49.57	7	0	3.55023e+07	3.39065e+07	2.92805e+07
High	IsMasterProtein	P08243	Asparagine synthetase [glutamine-hydrolyzing] OS=Homo sapiens OX=9606 GN=ASNS PE=1 SV=4	0	FALSE	42.493	22	10	25	10	561	64.3	6.86	61.79	10	0	9.63367e+07	9.71428e+07	98883002
High	IsMasterProtein	Q8TEM1	Nuclear pore membrane glycoprotein 210 OS=Homo sapiens OX=9606 GN=NUP210 PE=1 SV=3	0	FALSE	42.349	6	9	18	9	1887	205	6.81	56.65	9	0	2.20836e+07	3.78821e+07	2.21063e+07
High	IsMasterProtein	P62244	40S ribosomal protein S15a OS=Homo sapiens OX=9606 GN=RPS15A PE=1 SV=2	0	FALSE	41.494	57	7	21	7	130	14.8	10.13	58.3	7	0	1.83002e+08	1.85284e+08	1.79977e+08
High	IsMasterProtein	Q9Y678	Coatomer subunit gamma-1 OS=Homo sapiens OX=9606 GN=COPG1 PE=1 SV=1	0	FALSE	41.33	9	7	25	5	874	97.7	5.47	42.35	7	2	9.20037e+07	9.65798e+07	9.63268e+07
High	IsMasterProtein	Q9Y265	RuvB-like 1 OS=Homo sapiens OX=9606 GN=RUVBL1 PE=1 SV=1	0	FALSE	41.328	20	7	22	7	456	50.2	6.42	66.18	7	0	5.54885e+07	5.71173e+07	57384556
High	IsMasterProtein	P26639	Threonine--tRNA ligase 1, cytoplasmic OS=Homo sapiens OX=9606 GN=TARS1 PE=1 SV=3	0	FALSE	41.161	18	11	25	11	723	83.4	6.67	65.17	11	0	4.35848e+07	4.1972e+07	4.13603e+07
High	IsMasterProtein	P56192	Methionine--tRNA ligase, cytoplasmic OS=Homo sapiens OX=9606 GN=MARS PE=1 SV=2	0	FALSE	41.04	17	10	20	10	900	101.1	6.16	55.77	10	0	3.21665e+07	4.09212e+07	4.78423e+07
High	IsMasterProtein	P09874	Poly [ADP-ribose] polymerase 1 OS=Homo sapiens OX=9606 GN=PARP1 PE=1 SV=4	0	FALSE	40.787	10	7	20	7	1014	113	8.88	56.71	7	0	3.73732e+07	3.80417e+07	3.83954e+07
High	IsMasterProtein	P38919	Eukaryotic initiation factor 4A-III OS=Homo sapiens OX=9606 GN=EIF4A3 PE=1 SV=4	0	FALSE	40.428	22	9	20	7	411	46.8	6.73	57.08	9	0	4.04251e+07	4.23499e+07	4.44486e+07
High	IsMasterProtein	O75643	U5 small nuclear ribonucleoprotein 200 kDa helicase OS=Homo sapiens OX=9606 GN=SNRNP200 PE=1 SV=2	0	FALSE	39.955	6	9	16	9	2136	244.4	6.06	39.45	9	0	1.99193e+07	2.0198e+07	2.02157e+07
High	IsMasterProtein	O94901-9	Isoform 9 of SUN domain-containing protein 1 OS=Homo sapiens OX=9606 GN=SUN1	0	FALSE	39.807	10	7	15	7	916	101.9	7.31	54.23	7	0	3.0144e+07	3.03818e+07	2.35383e+07
High	IsMasterProtein	P41250	Glycine--tRNA ligase OS=Homo sapiens OX=9606 GN=GARS1 PE=1 SV=3	0	FALSE	39.629	13	7	17	7	739	83.1	7.03	50.67	7	0	3.07555e+07	4.05163e+07	4.04658e+07
High	IsMasterProtein	Q13283	Ras GTPase-activating protein-binding protein 1 OS=Homo sapiens OX=9606 GN=G3BP1 PE=1 SV=1	0	FALSE	39.328	22	7	19	7	466	52.1	5.52	68.57	7	0	3.78106e+07	3.86232e+07	3.63418e+07
High	IsMasterProtein	P15880	40S ribosomal protein S2 OS=Homo sapiens OX=9606 GN=RPS2 PE=1 SV=2	0	FALSE	39.322	33	9	24	9	293	31.3	10.24	66.84	9	0	1.07358e+08	1.15503e+08	1.12775e+08
High	IsMasterProtein	P78371	T-complex protein 1 subunit beta OS=Homo sapiens OX=9606 GN=CCT2 PE=1 SV=4	0	FALSE	38.849	15	5	16	5	535	57.5	6.46	57.77	5	0	3.03515e+07	3.38218e+07	3.33017e+07
High	IsMasterProtein	P84085	ADP-ribosylation factor 5 OS=Homo sapiens OX=9606 GN=ARF5 PE=1 SV=2	0	FALSE	38.841	42	6	31	1	180	20.5	6.79	70.73	6	0	2.30952e+07	2.26648e+07	2.48303e+07
High	IsMasterProtein	P54886	Delta-1-pyrroline-5-carboxylate synthase OS=Homo sapiens OX=9606 GN=ALDH18A1 PE=1 SV=2	0	FALSE	38.821	15	8	17	8	795	87.2	7.12	45.82	8	0	3.37494e+07	2.47282e+07	3.34468e+07
High	IsMasterProtein	Q9P2J5	Leucine--tRNA ligase, cytoplasmic OS=Homo sapiens OX=9606 GN=LARS PE=1 SV=2	0	FALSE	38.55	9	9	19	9	1176	134.4	7.3	51.24	9	0	3.50108e+07	3.42555e+07	3.78902e+07
High	IsMasterProtein	P32969	60S ribosomal protein L9 OS=Homo sapiens OX=9606 GN=RPL9 PE=1 SV=1	0	FALSE	38.252	54	6	18	6	192	21.9	9.95	61.97	6	0	6.32284e+07	6.22504e+07	6.49128e+07
High	IsMasterProtein	Q07065	Cytoskeleton-associated protein 4 OS=Homo sapiens OX=9606 GN=CKAP4 PE=1 SV=2	0	FALSE	38.094	17	8	15	8	602	66	5.92	46.53	8	0	3.89366e+07	3.31137e+07	3.43143e+07
High	IsMasterProtein	O60716	Catenin delta-1 OS=Homo sapiens OX=9606 GN=CTNND1 PE=1 SV=1	0	FALSE	38.085	10	7	19	7	968	108.1	6.23	64.92	7	0	3.454e+07	3.40718e+07	3.3412e+07
High	IsMasterProtein	Q16850	Lanosterol 14-alpha demethylase OS=Homo sapiens OX=9606 GN=CYP51A1 PE=1 SV=3	0	FALSE	38.008	16	5	11	5	503	56.8	8.53	36.27	5	0	6.59236e+06	6.65567e+06	7.24474e+06
High	IsMasterProtein	P49959	Double-strand break repair protein MRE11 OS=Homo sapiens OX=9606 GN=MRE11 PE=1 SV=3	0	FALSE	37.887	17	12	22	12	708	80.5	5.9	59.45	12	0	8.01395e+07	8.4523e+07	7.39541e+07
High	IsMasterProtein	P25787	Proteasome subunit alpha type-2 OS=Homo sapiens OX=9606 GN=PSMA2 PE=1 SV=2	0	FALSE	37.875	41	6	12	6	234	25.9	7.43	41.6	6	0	2.60781e+07	2.78686e+07	2.38092e+07
High	IsMasterProtein	P33993	DNA replication licensing factor MCM7 OS=Homo sapiens OX=9606 GN=MCM7 PE=1 SV=4	0	FALSE	37.62	12	6	17	6	719	81.3	6.46	59.94	6	0	2.88244e+07	2.81946e+07	2.80108e+07
High	IsMasterProtein	P27695	DNA-(apurinic or apyrimidinic site) lyase OS=Homo sapiens OX=9606 GN=APEX1 PE=1 SV=2	0	FALSE	37.427	33	8	18	8	318	35.5	8.12	58.51	8	0	5.51127e+07	5.07601e+07	4.90279e+07
High	IsMasterProtein	O14818	Proteasome subunit alpha type-7 OS=Homo sapiens OX=9606 GN=PSMA7 PE=1 SV=1	0	FALSE	37.194	43	7	15	7	248	27.9	8.46	46.82	7	0	2.98317e+07	3.35691e+07	3.13344e+07
High	IsMasterProtein	Q8TEX9	Importin-4 OS=Homo sapiens OX=9606 GN=IPO4 PE=1 SV=2	0	FALSE	37.075	10	7	19	7	1081	118.6	4.96	55.15	7	0	1.70223e+07	1.66582e+07	1.40119e+07
High	IsMasterProtein	P60891	Ribose-phosphate pyrophosphokinase 1 OS=Homo sapiens OX=9606 GN=PRPS1 PE=1 SV=2	0	FALSE	36.863	23	6	14	6	318	34.8	6.98	35.11	6	0	4.22498e+07	3.2469e+07	4.35331e+07
High	IsMasterProtein	P49792	E3 SUMO-protein ligase RanBP2 OS=Homo sapiens OX=9606 GN=RANBP2 PE=1 SV=2	0	FALSE	36.764	4	8	17	8	3224	358	6.2	42.65	8	0	2.6994e+07	2.59192e+07	2.58521e+07
High	IsMasterProtein	P27348	14-3-3 protein theta OS=Homo sapiens OX=9606 GN=YWHAQ PE=1 SV=1	0	FALSE	36.553	40	8	31	4	245	27.7	4.78	72.23	8	1	1.23773e+08	1.21141e+08	1.28698e+08
High	IsMasterProtein	P36873	Serine/threonine-protein phosphatase PP1-gamma catalytic subunit OS=Homo sapiens OX=9606 GN=PPP1CC PE=1 SV=1	0	FALSE	36.352	25	6	17	2	323	37	6.54	56.26	6	4	3.68878e+07	3.74058e+07	3.94176e+07
High	IsMasterProtein	Q9Y617	Phosphoserine aminotransferase OS=Homo sapiens OX=9606 GN=PSAT1 PE=1 SV=2	0	FALSE	36.192	33	10	26	10	370	40.4	7.66	67.01	10	0	6.65406e+07	7.49421e+07	59690367
High	IsMasterProtein	P18085	ADP-ribosylation factor 4 OS=Homo sapiens OX=9606 GN=ARF4 PE=1 SV=3	0	FALSE	36.177	42	6	19	2	180	20.5	7.14	65.92	6	0	2.88154e+07	2.97942e+07	27953881
High	IsMasterProtein	P23381	Tryptophan--tRNA ligase, cytoplasmic OS=Homo sapiens OX=9606 GN=WARS PE=1 SV=2	0	FALSE	36.175	21	7	16	7	471	53.1	6.23	53.17	7	0	5.22715e+07	4.46295e+07	4.53053e+07
High	IsMasterProtein	P12004	Proliferating cell nuclear antigen OS=Homo sapiens OX=9606 GN=PCNA PE=1 SV=1	0	FALSE	36.058	29	7	24	7	261	28.8	4.69	58.11	7	0	1.2282e+08	1.2341e+08	1.21737e+08
High	IsMasterProtein	O15498	Synaptobrevin homolog YKT6 OS=Homo sapiens OX=9606 GN=YKT6 PE=1 SV=1	0	FALSE	36.041	40	6	20	6	198	22.4	6.92	55.3	6	0	6.40978e+07	6.49627e+07	6.21804e+07
High	IsMasterProtein	Q15084	Protein disulfide-isomerase A6 OS=Homo sapiens OX=9606 GN=PDIA6 PE=1 SV=1	0	FALSE	35.872	17	5	20	5	440	48.1	5.08	61.34	5	0	3.90228e+07	3.65083e+07	4.06755e+07
High	IsMasterProtein	P05141	ADP/ATP translocase 2 OS=Homo sapiens OX=9606 GN=SLC25A5 PE=1 SV=7	0	FALSE	35.866	33	11	48	3	298	32.8	9.69	101.67	11	0	1.03028e+08	1.04315e+08	100784558
High	IsMasterProtein	Q7Z2W4	Zinc finger CCCH-type antiviral protein 1 OS=Homo sapiens OX=9606 GN=ZC3HAV1 PE=1 SV=3	0	FALSE	35.824	14	11	19	11	902	101.4	8.4	54.38	11	0	4.25789e+07	4.52101e+07	41338958
High	IsMasterProtein	P52292	Importin subunit alpha-1 OS=Homo sapiens OX=9606 GN=KPNA2 PE=1 SV=1	0	FALSE	35.745	17	6	18	6	529	57.8	5.4	57.85	6	0	2.9426e+07	3.02319e+07	3.01687e+07
High	IsMasterProtein	Q9UHB9	Signal recognition particle subunit SRP68 OS=Homo sapiens OX=9606 GN=SRP68 PE=1 SV=2	0	FALSE	35.654	21	10	17	10	627	70.7	8.56	38.49	10	0	3.40683e+07	3.36552e+07	36639863
High	IsMasterProtein	Q5T8P6	RNA-binding protein 26 OS=Homo sapiens OX=9606 GN=RBM26 PE=1 SV=3	0	FALSE	35.642	8	6	14	6	1007	113.5	9.16	48.48	6	0	4.09739e+07	3.41197e+07	3.79388e+07
High	IsMasterProtein	Q9Y4E8	Ubiquitin carboxyl-terminal hydrolase 15 OS=Homo sapiens OX=9606 GN=USP15 PE=1 SV=3	0	FALSE	35.368	8	6	14	6	981	112.3	5.22	49.89	6	0	1.99746e+07	1.729e+07	2.14601e+07
High	IsMasterProtein	P09960	Leukotriene A-4 hydrolase OS=Homo sapiens OX=9606 GN=LTA4H PE=1 SV=2	0	FALSE	35.208	21	9	17	9	611	69.2	6.18	47.56	9	0	3.08211e+07	3.33585e+07	2.80322e+07
High	IsMasterProtein	Q9BQG0	Myb-binding protein 1A OS=Homo sapiens OX=9606 GN=MYBBP1A PE=1 SV=2	0	FALSE	35.184	6	6	16	6	1328	148.8	9.28	54.56	6	0	9.94216e+07	1.58671e+07	1.09312e+08
High	IsMasterProtein	P12236	ADP/ATP translocase 3 OS=Homo sapiens OX=9606 GN=SLC25A6 PE=1 SV=4	0	FALSE	35.068	37	12	46	4	298	32.8	9.74	97.47	12	7	6.84971e+08	7.10883e+08	696370260
High	IsMasterProtein	Q8WVM8	Sec1 family domain-containing protein 1 OS=Homo sapiens OX=9606 GN=SCFD1 PE=1 SV=4	0	FALSE	35.037	15	5	6	5	642	72.3	6.27	23.6	5	0	1.43045e+07	1.44916e+07	1.6359e+07
High	IsMasterProtein	P52597	Heterogeneous nuclear ribonucleoprotein F OS=Homo sapiens OX=9606 GN=HNRNPF PE=1 SV=3	0	FALSE	34.033	11	3	17	1	415	45.6	5.58	62.69	3	0	9.07383e+06	9.95138e+06	9.02317e+06
High	IsMasterProtein	Q12907	Vesicular integral-membrane protein VIP36 OS=Homo sapiens OX=9606 GN=LMAN2 PE=1 SV=1	0	FALSE	33.864	28	8	22	8	356	40.2	6.95	64.81	8	0	8.77252e+07	8.25156e+07	8.17637e+07
High	IsMasterProtein	P53396	ATP-citrate synthase OS=Homo sapiens OX=9606 GN=ACLY PE=1 SV=3	0	FALSE	33.606	9	9	22	9	1101	120.8	7.33	52.91	9	0	5.74833e+07	6.68627e+07	5.80674e+07
High	IsMasterProtein	Q99460	26S proteasome non-ATPase regulatory subunit 1 OS=Homo sapiens OX=9606 GN=PSMD1 PE=1 SV=2	0	FALSE	33.59	13	7	13	7	953	105.8	5.39	40.6	7	0	2.69059e+07	2.52611e+07	2.46054e+07
High	IsMasterProtein	P41091	Eukaryotic translation initiation factor 2 subunit 3 OS=Homo sapiens OX=9606 GN=EIF2S3 PE=1 SV=3	0	FALSE	33.295	23	9	20	9	472	51.1	8.4	50.03	9	0	5.56463e+07	6.18025e+07	6.26796e+07
High	IsMasterProtein	Q14152	Eukaryotic translation initiation factor 3 subunit A OS=Homo sapiens OX=9606 GN=EIF3A PE=1 SV=1	0	FALSE	33.16	7	8	19	8	1382	166.5	6.79	51.35	8	0	2.76827e+07	2.71863e+07	2.93812e+07
High	IsMasterProtein	Q9H9B4	Sideroflexin-1 OS=Homo sapiens OX=9606 GN=SFXN1 PE=1 SV=4	0	FALSE	33.006	33	7	19	7	322	35.6	9.07	60.5	7	0	5.04106e+07	5.27781e+07	4.82978e+07
High	IsMasterProtein	P11940	Polyadenylate-binding protein 1 OS=Homo sapiens OX=9606 GN=PABPC1 PE=1 SV=2	0	FALSE	32.808	14	9	23	9	636	70.6	9.5	56.02	9	0	7.33804e+07	7.28487e+07	8.56305e+07
High	IsMasterProtein	O00410	Importin-5 OS=Homo sapiens OX=9606 GN=IPO5 PE=1 SV=4	0	FALSE	32.757	8	6	12	6	1097	123.6	4.94	38.08	6	0	2.73463e+07	2.27302e+07	2.59389e+07
High	IsMasterProtein	P61163	Alpha-centractin OS=Homo sapiens OX=9606 GN=ACTR1A PE=1 SV=1	0	FALSE	32.618	23	4	13	4	376	42.6	6.64	50.44	4	0	1.67937e+07	1.57696e+07	1.77971e+07
High	IsMasterProtein	Q53GQ0	Very-long-chain 3-oxoacyl-CoA reductase OS=Homo sapiens OX=9606 GN=HSD17B12 PE=1 SV=2	0	FALSE	32.246	19	4	11	4	312	34.3	9.32	40.81	4	0	2.68407e+07	2.37406e+07	2.21159e+07
High	IsMasterProtein	P31946	14-3-3 protein beta/alpha OS=Homo sapiens OX=9606 GN=YWHAB PE=1 SV=3	0	FALSE	32.088	29	6	27	2	246	28.1	4.83	63.82	6	0	7.48388e+06	8.94003e+06	5.74861e+06
High	IsMasterProtein	P62136	Serine/threonine-protein phosphatase PP1-alpha catalytic subunit OS=Homo sapiens OX=9606 GN=PPP1CA PE=1 SV=1	0	FALSE	32.072	23	5	14	1	330	37.5	6.33	44.75	5	0	3.77583e+06	3.60206e+06	3.57365e+06
High	IsMasterProtein	P49588	Alanine--tRNA ligase, cytoplasmic OS=Homo sapiens OX=9606 GN=AARS PE=1 SV=2	0	FALSE	31.865	9	6	16	6	968	106.7	5.53	34.65	6	0	1.63296e+07	1.72712e+07	1.50105e+07
High	IsMasterProtein	Q8NBS9	Thioredoxin domain-containing protein 5 OS=Homo sapiens OX=9606 GN=TXNDC5 PE=1 SV=2	0	FALSE	31.846	20	6	14	6	432	47.6	5.97	34.12	6	0	2.01231e+07	2.06754e+07	2.27961e+07
High	IsMasterProtein	P61247	40S ribosomal protein S3a OS=Homo sapiens OX=9606 GN=RPS3A PE=1 SV=2	0	FALSE	31.614	25	6	20	6	264	29.9	9.73	64.38	6	0	9.91553e+07	9.24496e+07	9.49341e+07
High	IsMasterProtein	Q14247	Src substrate cortactin OS=Homo sapiens OX=9606 GN=CTTN PE=1 SV=2	0	FALSE	31.584	18	8	23	8	550	61.5	5.4	52.53	8	0	8.70043e+07	8.98396e+07	90224650
High	IsMasterProtein	P33240	Cleavage stimulation factor subunit 2 OS=Homo sapiens OX=9606 GN=CSTF2 PE=1 SV=1	0	FALSE	31.436	15	7	25	3	577	60.9	6.83	51.67	7	4	5.7662e+07	5.97737e+07	5.594e+07
High	IsMasterProtein	Q14166	Tubulin--tyrosine ligase-like protein 12 OS=Homo sapiens OX=9606 GN=TTLL12 PE=1 SV=2	0	FALSE	30.975	16	5	7	5	644	74.4	5.53	28.61	5	0	1.47183e+07	1.50249e+07	1.52167e+07
High	IsMasterProtein	Q15293	Reticulocalbin-1 OS=Homo sapiens OX=9606 GN=RCN1 PE=1 SV=1	0	FALSE	30.924	25	7	19	7	331	38.9	5	56.6	7	0	4.92044e+07	4.61253e+07	45913272
High	IsMasterProtein	Q9Y490	Talin-1 OS=Homo sapiens OX=9606 GN=TLN1 PE=1 SV=3	0	FALSE	30.781	4	8	16	8	2541	269.6	6.07	33.77	8	0	5.03277e+07	4.82176e+07	46722034
High	IsMasterProtein	P12277	Creatine kinase B-type OS=Homo sapiens OX=9606 GN=CKB PE=1 SV=1	0	FALSE	30.426	20	5	9	5	381	42.6	5.59	28.57	5	0	3.00773e+07	3.31923e+07	2.72282e+07
High	IsMasterProtein	P23528	Cofilin-1 OS=Homo sapiens OX=9606 GN=CFL1 PE=1 SV=3	0	FALSE	30.323	41	6	9	6	166	18.5	8.09	27.55	6	0	2.86114e+07	2.70237e+07	2.87591e+07
High	IsMasterProtein	Q12906	Interleukin enhancer-binding factor 3 OS=Homo sapiens OX=9606 GN=ILF3 PE=1 SV=3	0	FALSE	30.307	8	6	15	6	894	95.3	8.76	39.58	6	0	3.58758e+07	3.58716e+07	4.18857e+07
High	IsMasterProtein	Q04917	14-3-3 protein eta OS=Homo sapiens OX=9606 GN=YWHAH PE=1 SV=4	0	FALSE	29.902	22	6	23	3	246	28.2	4.84	45.96	6	0	1.05787e+07	1.56929e+07	15854222
High	IsMasterProtein	P28074	Proteasome subunit beta type-5 OS=Homo sapiens OX=9606 GN=PSMB5 PE=1 SV=3	0	FALSE	29.882	24	5	12	5	263	28.5	6.92	39.5	5	0	3.64913e+07	3.58245e+07	37877376
High	IsMasterProtein	P61313	60S ribosomal protein L15 OS=Homo sapiens OX=9606 GN=RPL15 PE=1 SV=2	0	FALSE	29.554	33	8	27	8	204	24.1	11.62	64.65	8	0	8.58674e+07	7.99944e+07	8.20916e+07
High	IsMasterProtein	P23526	Adenosylhomocysteinase OS=Homo sapiens OX=9606 GN=AHCY PE=1 SV=4	0	FALSE	29.182	17	7	23	7	432	47.7	6.34	56.56	7	0	6.06577e+07	6.18105e+07	6.2083e+07
High	IsMasterProtein	P31943	Heterogeneous nuclear ribonucleoprotein H OS=Homo sapiens OX=9606 GN=HNRNPH1 PE=1 SV=4	0	FALSE	29.065	13	4	15	2	449	49.2	6.3	49.14	4	2	3.59892e+07	3.87193e+07	3.94965e+07
High	IsMasterProtein	Q9BSJ8	Extended synaptotagmin-1 OS=Homo sapiens OX=9606 GN=ESYT1 PE=1 SV=1	0	FALSE	28.978	6	5	14	5	1104	122.8	5.83	35.59	5	0	3.03402e+07	3.1055e+07	2.8336e+07
High	IsMasterProtein	P36578	60S ribosomal protein L4 OS=Homo sapiens OX=9606 GN=RPL4 PE=1 SV=5	0	FALSE	28.636	17	7	18	7	427	47.7	11.06	56.13	7	0	6.5912e+07	6.39435e+07	62369715
High	IsMasterProtein	Q07955	Serine/arginine-rich splicing factor 1 OS=Homo sapiens OX=9606 GN=SRSF1 PE=1 SV=2	0	FALSE	28.628	36	7	18	7	248	27.7	10.36	48.8	7	0	4.64009e+07	4.81145e+07	4.53816e+07
High	IsMasterProtein	Q9Y2Z0	Protein SGT1 homolog OS=Homo sapiens OX=9606 GN=SUGT1 PE=1 SV=3	0	FALSE	28.403	21	5	13	5	365	41	5.16	43.8	5	0	2.17067e+07	2.1788e+07	2.10604e+07
High	IsMasterProtein	O75663	TIP41-like protein OS=Homo sapiens OX=9606 GN=TIPRL PE=1 SV=2	0	FALSE	28.285	32	7	15	7	272	31.4	5.91	38.03	7	0	4.67816e+07	4.69723e+07	4.857e+07
High	IsMasterProtein	P62906	60S ribosomal protein L10a OS=Homo sapiens OX=9606 GN=RPL10A PE=1 SV=2	0	FALSE	28.269	21	4	16	4	217	24.8	9.94	40.29	4	0	6.16316e+07	6.2206e+07	5.67313e+07
High	IsMasterProtein	Q13347	Eukaryotic translation initiation factor 3 subunit I OS=Homo sapiens OX=9606 GN=EIF3I PE=1 SV=1	0	FALSE	28.205	18	5	16	5	325	36.5	5.64	51.1	5	0	3.3431e+07	3.20616e+07	2.98725e+07
High	IsMasterProtein	P49720	Proteasome subunit beta type-3 OS=Homo sapiens OX=9606 GN=PSMB3 PE=1 SV=2	0	FALSE	28.182	26	4	18	4	205	22.9	6.55	61.83	4	0	4.31636e+07	4.25579e+07	4.31862e+07
High	IsMasterProtein	O15173	Membrane-associated progesterone receptor component 2 OS=Homo sapiens OX=9606 GN=PGRMC2 PE=1 SV=1	0	FALSE	28.139	29	6	22	5	223	23.8	4.88	52.58	6	1	1.87205e+08	1.84333e+08	185230635
High	IsMasterProtein	P10768	S-formylglutathione hydrolase OS=Homo sapiens OX=9606 GN=ESD PE=1 SV=2	0	FALSE	27.867	33	5	15	5	282	31.4	7.02	52.79	5	0	2.7573e+07	2.87653e+07	28276982
High	IsMasterProtein	Q15365	Poly(rC)-binding protein 1 OS=Homo sapiens OX=9606 GN=PCBP1 PE=1 SV=2	0	FALSE	27.83	21	6	18	5	356	37.5	7.09	50.45	6	1	9.1359e+07	8.92156e+07	85788127
High	IsMasterProtein	P62241	40S ribosomal protein S8 OS=Homo sapiens OX=9606 GN=RPS8 PE=1 SV=2	0	FALSE	27.476	35	6	13	6	208	24.2	10.32	37.28	6	0	3.04471e+07	2.99271e+07	2.8591e+07
High	IsMasterProtein	Q9NSD9	Phenylalanine--tRNA ligase beta subunit OS=Homo sapiens OX=9606 GN=FARSB PE=1 SV=3	0	FALSE	27.377	13	7	16	7	589	66.1	6.84	30.54	7	0	3.38565e+07	3.31658e+07	3.56895e+07
High	IsMasterProtein	Q13724	Mannosyl-oligosaccharide glucosidase OS=Homo sapiens OX=9606 GN=MOGS PE=1 SV=5	0	FALSE	27.328	6	4	10	4	837	91.9	8.9	39.31	4	0	1.3154e+07	1.37352e+07	1.32382e+07
High	IsMasterProtein	Q86VP6	Cullin-associated NEDD8-dissociated protein 1 OS=Homo sapiens OX=9606 GN=CAND1 PE=1 SV=2	0	FALSE	27.304	8	8	13	8	1230	136.3	5.78	32.29	8	0	2.63161e+07	2.42752e+07	2.76825e+07
High	IsMasterProtein	Q14157-1	Isoform 2 of Ubiquitin-associated protein 2-like OS=Homo sapiens OX=9606 GN=UBAP2L	0	FALSE	27.169	6	5	16	5	983	103.9	6.98	52.44	5	0	3.9939e+07	3.9941e+07	39041608
High	IsMasterProtein	P51571	Translocon-associated protein subunit delta OS=Homo sapiens OX=9606 GN=SSR4 PE=1 SV=1	0	FALSE	27.089	29	5	19	5	173	19	6.15	52.22	5	0	5.27166e+07	5.52521e+07	4.76416e+07
High	IsMasterProtein	Q8NC51	Plasminogen activator inhibitor 1 RNA-binding protein OS=Homo sapiens OX=9606 GN=SERBP1 PE=1 SV=2	0	FALSE	26.822	15	5	13	5	408	44.9	8.65	49.64	5	0	3.60718e+07	3.48052e+07	3.62527e+07
High	IsMasterProtein	Q9UGP8	Translocation protein SEC63 homolog OS=Homo sapiens OX=9606 GN=SEC63 PE=1 SV=2	0	FALSE	26.772	11	6	14	6	760	87.9	5.31	39.93	6	0	3.27288e+07	3.71565e+07	3.37304e+07
High	IsMasterProtein	Q13620-1	Isoform 2 of Cullin-4B OS=Homo sapiens OX=9606 GN=CUL4B	0	FALSE	26.628	8	6	13	6	895	102.2	7.94	37	6	0	2.54172e+07	2.466e+07	2.44299e+07
High	IsMasterProtein	Q96QK1	Vacuolar protein sorting-associated protein 35 OS=Homo sapiens OX=9606 GN=VPS35 PE=1 SV=2	0	FALSE	26.608	10	6	13	6	796	91.6	5.49	31.67	6	0	1.41397e+07	1.42888e+07	1.3752e+07
High	IsMasterProtein	P27635	60S ribosomal protein L10 OS=Homo sapiens OX=9606 GN=RPL10 PE=1 SV=4	0	FALSE	26.549	26	6	24	6	214	24.6	10.08	52.57	6	0	1.04078e+08	1.064e+08	1.07055e+08
High	IsMasterProtein	Q7L014	Probable ATP-dependent RNA helicase DDX46 OS=Homo sapiens OX=9606 GN=DDX46 PE=1 SV=2	0	FALSE	26.451	9	8	14	8	1031	117.3	9.29	32.69	8	0	3.62056e+07	3.25499e+07	3.47524e+07
High	IsMasterProtein	P22087	rRNA 2'-O-methyltransferase fibrillarin OS=Homo sapiens OX=9606 GN=FBL PE=1 SV=2	0	FALSE	26.207	24	4	10	4	321	33.8	10.18	39.52	4	0	3.55337e+07	2.75e+07	3.35216e+07
High	IsMasterProtein	Q9Y262	Eukaryotic translation initiation factor 3 subunit L OS=Homo sapiens OX=9606 GN=EIF3L PE=1 SV=1	0	FALSE	26.146	8	4	13	4	564	66.7	6.34	32.54	4	0	1.71628e+07	1.70811e+07	1.60819e+07
High	IsMasterProtein	Q96S66	Chloride channel CLIC-like protein 1 OS=Homo sapiens OX=9606 GN=CLCC1 PE=1 SV=1	0	FALSE	26.069	14	6	14	6	551	62	5.55	35.68	6	0	3.49964e+07	3.16799e+07	2.21339e+07
High	IsMasterProtein	B5ME19	Eukaryotic translation initiation factor 3 subunit C-like protein OS=Homo sapiens OX=9606 GN=EIF3CL PE=1 SV=1	0	FALSE	25.769	7	5	12	5	914	105.4	5.64	38.53	5	0	2.01874e+07	2.08431e+07	2.03737e+07
High	IsMasterProtein	Q15393	Splicing factor 3B subunit 3 OS=Homo sapiens OX=9606 GN=SF3B3 PE=1 SV=4	0	FALSE	25.741	7	7	12	7	1217	135.5	5.26	34.15	7	0	6.37158e+07	6.41803e+07	63859619
High	IsMasterProtein	Q13596	Sorting nexin-1 OS=Homo sapiens OX=9606 GN=SNX1 PE=1 SV=3	0	FALSE	25.706	13	5	10	4	522	59	5.15	27.22	5	1	1.34548e+07	1.45379e+07	1.21798e+07
High	IsMasterProtein	Q15008	26S proteasome non-ATPase regulatory subunit 6 OS=Homo sapiens OX=9606 GN=PSMD6 PE=1 SV=1	0	FALSE	25.631	18	6	15	6	389	45.5	5.62	42.82	6	0	2.99721e+07	2.8661e+07	2.77613e+07
High	IsMasterProtein	P09543	2',3'-cyclic-nucleotide 3'-phosphodiesterase OS=Homo sapiens OX=9606 GN=CNP PE=1 SV=2	0	FALSE	25.611	16	5	10	5	421	47.5	9.07	23.7	5	0	1.21495e+07	1.06038e+07	1.07958e+07
High	IsMasterProtein	P39023	60S ribosomal protein L3 OS=Homo sapiens OX=9606 GN=RPL3 PE=1 SV=2	0	FALSE	25.55	14	5	12	5	403	46.1	10.18	35.2	5	0	3.52956e+07	3.50413e+07	3.45069e+07
High	IsMasterProtein	Q9UMS4	Pre-mRNA-processing factor 19 OS=Homo sapiens OX=9606 GN=PRPF19 PE=1 SV=1	0	FALSE	25.487	13	7	19	7	504	55.1	6.61	48.19	7	0	6.76229e+07	6.90225e+07	6.3676e+07
High	IsMasterProtein	P28340	DNA polymerase delta catalytic subunit OS=Homo sapiens OX=9606 GN=POLD1 PE=1 SV=2	0	FALSE	25.471	6	5	8	4	1107	123.6	7.03	21.61	5	0	3.11882e+06	3.50738e+06	3.56165e+06
High	IsMasterProtein	O95433	Activator of 90 kDa heat shock protein ATPase homolog 1 OS=Homo sapiens OX=9606 GN=AHSA1 PE=1 SV=1	0	FALSE	25.452	13	4	11	4	338	38.3	5.53	42.3	4	0	2.55643e+07	2.71641e+07	27565616
High	IsMasterProtein	Q9Y3B4	Splicing factor 3B subunit 6 OS=Homo sapiens OX=9606 GN=SF3B6 PE=1 SV=1	0	FALSE	25.343	39	4	11	4	125	14.6	9.38	33.93	4	0	2.16174e+07	2.18559e+07	22824530
High	IsMasterProtein	P22695	Cytochrome b-c1 complex subunit 2, mitochondrial OS=Homo sapiens OX=9606 GN=UQCRC2 PE=1 SV=3	0	FALSE	25.252	12	4	11	4	453	48.4	8.63	35.96	4	0	2.44437e+07	2.4686e+07	1.87085e+07
High	IsMasterProtein	P49591	Serine--tRNA ligase, cytoplasmic OS=Homo sapiens OX=9606 GN=SARS PE=1 SV=3	0	FALSE	25.211	17	6	14	6	514	58.7	6.43	45.85	6	0	3.23876e+07	3.25555e+07	3.21698e+07
High	IsMasterProtein	Q15637	Splicing factor 1 OS=Homo sapiens OX=9606 GN=SF1 PE=1 SV=4	0	FALSE	25.114	8	4	15	4	639	68.3	8.98	49.27	4	0	7.6652e+07	7.61457e+07	7.88259e+07
High	IsMasterProtein	P46777	60S ribosomal protein L5 OS=Homo sapiens OX=9606 GN=RPL5 PE=1 SV=3	0	FALSE	25.061	17	5	17	5	297	34.3	9.72	43.7	5	0	8.79986e+07	9.94997e+07	9.66041e+07
High	IsMasterProtein	Q8TC12	Retinol dehydrogenase 11 OS=Homo sapiens OX=9606 GN=RDH11 PE=1 SV=2	0	FALSE	25.06	16	4	8	4	318	35.4	8.82	27.15	4	0	1.99698e+07	2.00106e+07	1.9974e+07
High	IsMasterProtein	P27816	Microtubule-associated protein 4 OS=Homo sapiens OX=9606 GN=MAP4 PE=1 SV=3	0	FALSE	25.044	7	6	10	6	1152	120.9	5.43	20.11	6	0	1.80129e+07	1.29737e+07	1.45683e+07
High	IsMasterProtein	P26368	Splicing factor U2AF 65 kDa subunit OS=Homo sapiens OX=9606 GN=U2AF2 PE=1 SV=4	0	FALSE	24.879	18	6	13	6	475	53.5	9.09	30.93	6	0	2.7813e+07	2.90437e+07	3.34396e+07
High	IsMasterProtein	Q9Y5B9	FACT complex subunit SPT16 OS=Homo sapiens OX=9606 GN=SUPT16H PE=1 SV=1	0	FALSE	24.86	8	7	15	7	1047	119.8	5.66	34.2	7	0	3.23642e+07	2.72369e+07	2.76541e+07
High	IsMasterProtein	P16152	Carbonyl reductase [NADPH] 1 OS=Homo sapiens OX=9606 GN=CBR1 PE=1 SV=3	0	FALSE	24.719	20	5	16	5	277	30.4	8.32	40.16	5	0	4.20248e+07	4.36722e+07	41463462
High	IsMasterProtein	O95372	Acyl-protein thioesterase 2 OS=Homo sapiens OX=9606 GN=LYPLA2 PE=1 SV=1	0	FALSE	24.681	18	3	12	3	231	24.7	7.23	50.3	3	0	7.55796e+07	7.28738e+07	73450266
High	IsMasterProtein	P05023	Sodium/potassium-transporting ATPase subunit alpha-1 OS=Homo sapiens OX=9606 GN=ATP1A1 PE=1 SV=1	0	FALSE	24.545	6	6	14	6	1023	112.8	5.49	41.19	6	0	2.97271e+07	3.02488e+07	29392493
High	IsMasterProtein	Q9NTJ3	Structural maintenance of chromosomes protein 4 OS=Homo sapiens OX=9606 GN=SMC4 PE=1 SV=2	0	FALSE	24.475	3	4	11	4	1288	147.1	6.79	29.7	4	0	1.37399e+07	1.47091e+07	1.33419e+07
High	IsMasterProtein	P08865	40S ribosomal protein SA OS=Homo sapiens OX=9606 GN=RPSA PE=1 SV=4	0	FALSE	24.24	19	4	12	4	295	32.8	4.87	42.16	4	0	6.50536e+07	6.65988e+07	60327776
High	IsMasterProtein	Q9NR31	GTP-binding protein SAR1a OS=Homo sapiens OX=9606 GN=SAR1A PE=1 SV=1	0	FALSE	24.154	27	4	13	4	198	22.4	6.68	36.46	4	0	2.12709e+07	1.86364e+07	2.06972e+07
High	IsMasterProtein	P00558	Phosphoglycerate kinase 1 OS=Homo sapiens OX=9606 GN=PGK1 PE=1 SV=3	0	FALSE	23.792	12	3	9	3	417	44.6	8.1	38.65	3	0	2.05573e+07	2.26694e+07	21680046
High	IsMasterProtein	P62913	60S ribosomal protein L11 OS=Homo sapiens OX=9606 GN=RPL11 PE=1 SV=2	0	FALSE	23.683	26	6	17	6	178	20.2	9.6	54.29	6	0	8.7169e+07	9.24033e+07	8.24714e+07
High	IsMasterProtein	O94919	Endonuclease domain-containing 1 protein OS=Homo sapiens OX=9606 GN=ENDOD1 PE=1 SV=2	0	FALSE	23.66	9	4	10	4	500	55	5.71	32.51	4	0	2.97039e+07	3.08741e+07	2.13108e+07
High	IsMasterProtein	Q9Y277	Voltage-dependent anion-selective channel protein 3 OS=Homo sapiens OX=9606 GN=VDAC3 PE=1 SV=1	0	FALSE	23.632	23	5	14	4	283	30.6	8.66	37.14	5	1	7.03067e+07	6.90704e+07	67677563
High	IsMasterProtein	P22626	Heterogeneous nuclear ribonucleoproteins A2/B1 OS=Homo sapiens OX=9606 GN=HNRNPA2B1 PE=1 SV=2	0	FALSE	23.566	17	6	17	5	353	37.4	8.95	50.82	6	0	3.51197e+07	3.72095e+07	3.58715e+07
High	IsMasterProtein	P52272	Heterogeneous nuclear ribonucleoprotein M OS=Homo sapiens OX=9606 GN=HNRNPM PE=1 SV=3	0	FALSE	23.547	9	5	15	5	730	77.5	8.7	49.09	5	0	3.6655e+07	3.57074e+07	35024215
High	IsMasterProtein	O43684	Mitotic checkpoint protein BUB3 OS=Homo sapiens OX=9606 GN=BUB3 PE=1 SV=1	0	FALSE	23.421	21	6	13	6	328	37.1	6.84	34.75	6	0	3.93026e+07	4.01726e+07	3.80515e+07
High	IsMasterProtein	P40925	Malate dehydrogenase, cytoplasmic OS=Homo sapiens OX=9606 GN=MDH1 PE=1 SV=4	0	FALSE	23.295	20	5	16	5	334	36.4	7.36	42.46	5	0	4.61377e+07	4.79088e+07	4.79081e+07
High	IsMasterProtein	Q9H0L4	Cleavage stimulation factor subunit 2 tau variant OS=Homo sapiens OX=9606 GN=CSTF2T PE=1 SV=1	0	FALSE	23.288	10	5	17	1	616	64.4	7.25	31.59	5	0	4.40043e+06	4.42009e+06	4630024
High	IsMasterProtein	Q8N3F8	MICAL-like protein 1 OS=Homo sapiens OX=9606 GN=MICALL1 PE=1 SV=2	0	FALSE	23.246	6	4	10	4	863	93.4	7.25	30.05	4	0	9.52925e+06	1.29057e+07	1.38449e+07
High	IsMasterProtein	Q9UQ80	Proliferation-associated protein 2G4 OS=Homo sapiens OX=9606 GN=PA2G4 PE=1 SV=3	0	FALSE	23.243	16	5	15	5	394	43.8	6.55	34.22	5	0	2.65655e+07	2.70236e+07	2.63484e+07
High	IsMasterProtein	P30041	Peroxiredoxin-6 OS=Homo sapiens OX=9606 GN=PRDX6 PE=1 SV=3	0	FALSE	23.233	27	6	14	6	224	25	6.38	32.2	6	0	5.80396e+07	5.93733e+07	5.68242e+07
High	IsMasterProtein	Q15021	Condensin complex subunit 1 OS=Homo sapiens OX=9606 GN=NCAPD2 PE=1 SV=3	0	FALSE	23.233	5	5	9	5	1401	157.1	6.61	26.48	5	0	5.38656e+06	3.88829e+06	6.06579e+06
High	IsMasterProtein	P63241	Eukaryotic translation initiation factor 5A-1 OS=Homo sapiens OX=9606 GN=EIF5A PE=1 SV=2	0	FALSE	23.114	36	4	13	4	154	16.8	5.24	38.52	4	0	3.00611e+07	3.28393e+07	3.12624e+07
High	IsMasterProtein	Q7Z4W1	L-xylulose reductase OS=Homo sapiens OX=9606 GN=DCXR PE=1 SV=2	0	FALSE	23.005	23	5	10	5	244	25.9	8.1	27.29	5	0	1.522e+07	1.48789e+07	1.51465e+07
High	IsMasterProtein	Q96AG4	Leucine-rich repeat-containing protein 59 OS=Homo sapiens OX=9606 GN=LRRC59 PE=1 SV=1	0	FALSE	22.991	21	5	16	5	307	34.9	9.57	51.13	5	0	4.65143e+07	4.74835e+07	4.87423e+07
High	IsMasterProtein	Q5JTV8-3	Isoform 3 of Torsin-1A-interacting protein 1 OS=Homo sapiens OX=9606 GN=TOR1AIP1	0	FALSE	22.932	9	4	11	4	584	66.3	8.18	33.14	4	0	2.37851e+07	2.74432e+07	25440199
High	IsMasterProtein	O00425	Insulin-like growth factor 2 mRNA-binding protein 3 OS=Homo sapiens OX=9606 GN=IGF2BP3 PE=1 SV=2	0	FALSE	22.9	12	5	8	4	579	63.7	8.87	24.26	5	1	2.92096e+07	2.79822e+07	3.04665e+07
High	IsMasterProtein	Q02878	60S ribosomal protein L6 OS=Homo sapiens OX=9606 GN=RPL6 PE=1 SV=3	0	FALSE	22.854	13	3	9	3	288	32.7	10.58	25.61	3	0	2.04883e+07	2.09199e+07	2.00825e+07
High	IsMasterProtein	P35606	Coatomer subunit beta' OS=Homo sapiens OX=9606 GN=COPB2 PE=1 SV=2	0	FALSE	22.758	8	5	8	5	906	102.4	5.27	15.55	5	0	1.44431e+07	1.52772e+07	1.45763e+07
High	IsMasterProtein	O43143	Pre-mRNA-splicing factor ATP-dependent RNA helicase DHX15 OS=Homo sapiens OX=9606 GN=DHX15 PE=1 SV=2	0	FALSE	22.645	8	5	15	5	795	90.9	7.46	45.71	5	0	2.5574e+07	2.66402e+07	2.43989e+07
High	IsMasterProtein	O94905	Erlin-2 OS=Homo sapiens OX=9606 GN=ERLIN2 PE=1 SV=1	0	FALSE	22.463	15	4	13	3	339	37.8	5.62	29.36	4	1	2.47008e+07	2.82639e+07	2.88856e+07
High	IsMasterProtein	Q96HE7	ERO1-like protein alpha OS=Homo sapiens OX=9606 GN=ERO1A PE=1 SV=2	0	FALSE	22.458	13	5	12	5	468	54.4	5.68	30.35	5	0	1.86985e+07	1.79548e+07	1.7836e+07
High	IsMasterProtein	P09429	High mobility group protein B1 OS=Homo sapiens OX=9606 GN=HMGB1 PE=1 SV=3	0	FALSE	22.27	26	4	12	4	215	24.9	5.74	42.24	4	0	4.44883e+07	4.43843e+07	4.6977e+07
High	IsMasterProtein	P53999	Activated RNA polymerase II transcriptional coactivator p15 OS=Homo sapiens OX=9606 GN=SUB1 PE=1 SV=3	0	FALSE	22.123	31	5	17	5	127	14.4	9.6	53.19	5	0	1.78657e+08	1.87971e+08	1.81199e+08
High	IsMasterProtein	P62701	40S ribosomal protein S4, X isoform OS=Homo sapiens OX=9606 GN=RPS4X PE=1 SV=2	0	FALSE	22.122	19	6	17	6	263	29.6	10.15	43.4	6	0	3.54582e+07	3.71091e+07	3.79877e+07
High	IsMasterProtein	Q9Y285	Phenylalanine--tRNA ligase alpha subunit OS=Homo sapiens OX=9606 GN=FARSA PE=1 SV=3	0	FALSE	21.924	8	3	7	3	508	57.5	7.8	26.64	3	0	1.33465e+07	1.22341e+07	1.31578e+07
High	IsMasterProtein	P46781	40S ribosomal protein S9 OS=Homo sapiens OX=9606 GN=RPS9 PE=1 SV=3	0	FALSE	21.852	31	8	19	8	194	22.6	10.65	32.96	8	0	8.0727e+07	8.65987e+07	8.09169e+07
High	IsMasterProtein	Q9UBF2	Coatomer subunit gamma-2 OS=Homo sapiens OX=9606 GN=COPG2 PE=1 SV=1	0	FALSE	21.831	7	4	17	2	871	97.6	5.81	25.93	4	0	1.79214e+06	1.93548e+06	1.74092e+06
High	IsMasterProtein	Q13263	Transcription intermediary factor 1-beta OS=Homo sapiens OX=9606 GN=TRIM28 PE=1 SV=5	0	FALSE	21.682	7	6	16	6	835	88.5	5.77	39.57	6	0	5.13406e+07	4.16222e+07	3.9934e+07
High	IsMasterProtein	Q15813	Tubulin-specific chaperone E OS=Homo sapiens OX=9606 GN=TBCE PE=1 SV=1	0	FALSE	21.506	9	3	8	3	527	59.3	6.76	24.35	3	0	9.49466e+06	8.36427e+06	7.82485e+06
High	IsMasterProtein	P46977	Dolichyl-diphosphooligosaccharide--protein glycosyltransferase subunit STT3A OS=Homo sapiens OX=9606 GN=STT3A PE=1 SV=2	0	FALSE	21.488	10	7	15	6	705	80.5	8.07	28.96	7	0	5.72136e+07	5.88688e+07	4.33948e+07
High	IsMasterProtein	Q15631	Translin OS=Homo sapiens OX=9606 GN=TSN PE=1 SV=1	0	FALSE	21.243	32	4	10	4	228	26.2	6.44	34.73	4	0	2.20618e+07	2.38855e+07	2.24988e+07
High	IsMasterProtein	Q9UBX3	Mitochondrial dicarboxylate carrier OS=Homo sapiens OX=9606 GN=SLC25A10 PE=1 SV=2	0	FALSE	21.223	17	3	10	3	287	31.3	9.54	32.96	3	0	8.48704e+06	8.99248e+06	9.29735e+06
High	IsMasterProtein	P48723	Heat shock 70 kDa protein 13 OS=Homo sapiens OX=9606 GN=HSPA13 PE=1 SV=1	0	FALSE	21.191	10	4	12	4	471	51.9	5.76	35.61	4	0	3.52707e+07	3.60259e+07	3.75078e+07
High	IsMasterProtein	O95292	Vesicle-associated membrane protein-associated protein B/C OS=Homo sapiens OX=9606 GN=VAPB PE=1 SV=3	0	FALSE	21.165	17	3	9	3	243	27.2	7.3	32.47	3	0	2.79737e+07	2.69831e+07	2.61869e+07
High	IsMasterProtein	O00264	Membrane-associated progesterone receptor component 1 OS=Homo sapiens OX=9606 GN=PGRMC1 PE=1 SV=3	0	FALSE	20.999	32	4	14	3	195	21.7	4.7	36.08	4	0	1.97301e+07	2.06217e+07	2.02754e+07
High	IsMasterProtein	Q5QNW6	Histone H2B type 2-F OS=Homo sapiens OX=9606 GN=HIST2H2BF PE=1 SV=3	0	FALSE	20.878	35	4	15	1	126	13.9	10.32	27.03	4	0	9.8261e+06	9.88748e+06	8614145
High	IsMasterProtein	Q16531	DNA damage-binding protein 1 OS=Homo sapiens OX=9606 GN=DDB1 PE=1 SV=1	0	FALSE	20.763	5	5	9	5	1140	126.9	5.26	27.84	5	0	1.57542e+07	1.79401e+07	1.7442e+07
High	IsMasterProtein	P12956	X-ray repair cross-complementing protein 6 OS=Homo sapiens OX=9606 GN=XRCC6 PE=1 SV=2	0	FALSE	20.665	13	5	11	5	609	69.8	6.64	37.41	5	0	1.7216e+07	2.5122e+07	23081376
High	IsMasterProtein	P51648	Aldehyde dehydrogenase family 3 member A2 OS=Homo sapiens OX=9606 GN=ALDH3A2 PE=1 SV=1	0	FALSE	20.561	9	4	10	4	485	54.8	7.88	19.55	4	0	1.73677e+07	1.86346e+07	1.79363e+07
High	IsMasterProtein	P31040	Succinate dehydrogenase [ubiquinone] flavoprotein subunit, mitochondrial OS=Homo sapiens OX=9606 GN=SDHA PE=1 SV=2	0	FALSE	20.553	6	3	9	3	664	72.6	7.39	30.58	3	0	1.40696e+07	1.4163e+07	1.33967e+07
High	IsMasterProtein	O95831	Apoptosis-inducing factor 1, mitochondrial OS=Homo sapiens OX=9606 GN=AIFM1 PE=1 SV=1	0	FALSE	20.421	4	2	6	2	613	66.9	8.95	24.57	2	0	8.17549e+06	1.09522e+07	6.66777e+06
High	IsMasterProtein	P62280	40S ribosomal protein S11 OS=Homo sapiens OX=9606 GN=RPS11 PE=1 SV=3	0	FALSE	20.396	23	3	8	3	158	18.4	10.3	23.55	3	0	1.94869e+07	2.1869e+07	2.09072e+07
High	IsMasterProtein	P49643	DNA primase large subunit OS=Homo sapiens OX=9606 GN=PRIM2 PE=1 SV=2	0	FALSE	20.339	9	4	9	4	509	58.8	7.91	24.49	4	0	9.74853e+06	7.83794e+06	8.01396e+06
High	IsMasterProtein	P14314	Glucosidase 2 subunit beta OS=Homo sapiens OX=9606 GN=PRKCSH PE=1 SV=2	0	FALSE	20.263	11	5	13	5	528	59.4	4.41	39.28	5	0	5.24793e+07	5.56073e+07	52699940
High	IsMasterProtein	Q00325-2	Isoform B of Phosphate carrier protein, mitochondrial OS=Homo sapiens OX=9606 GN=SLC25A3	0	FALSE	20.071	16	4	13	4	361	39.9	9.36	31.84	4	0	3.64835e+07	3.62701e+07	37720985
High	IsMasterProtein	P19623	Spermidine synthase OS=Homo sapiens OX=9606 GN=SRM PE=1 SV=1	0	FALSE	19.989	21	3	9	3	302	33.8	5.49	42.37	3	0	1.02311e+07	9.79367e+06	1.12346e+07
High	IsMasterProtein	Q92541	RNA polymerase-associated protein RTF1 homolog OS=Homo sapiens OX=9606 GN=RTF1 PE=1 SV=4	0	FALSE	19.878	8	5	10	5	710	80.3	8.15	30.76	5	0	2.70753e+07	2.7492e+07	2.83278e+07
High	IsMasterProtein	Q13148	TAR DNA-binding protein 43 OS=Homo sapiens OX=9606 GN=TARDBP PE=1 SV=1	0	FALSE	19.865	15	4	8	4	414	44.7	6.19	27.94	4	0	2.7099e+07	2.67939e+07	26104394
High	IsMasterProtein	Q9Y520	Protein PRRC2C OS=Homo sapiens OX=9606 GN=PRRC2C PE=1 SV=4	0	FALSE	19.854	2	4	10	4	2896	316.7	9.13	28.34	4	0	1.17638e+07	1.22266e+07	1.00341e+07
High	IsMasterProtein	Q8N4V1	Membrane magnesium transporter 1 OS=Homo sapiens OX=9606 GN=MMGT1 PE=1 SV=1	0	FALSE	19.854	21	2	9	2	131	14.7	9.16	28	2	0	2.63779e+06	1.88144e+07	2.76741e+06
High	IsMasterProtein	Q16629	Serine/arginine-rich splicing factor 7 OS=Homo sapiens OX=9606 GN=SRSF7 PE=1 SV=1	0	FALSE	19.773	20	4	10	3	238	27.4	11.82	35.54	4	0	1.42255e+07	1.22803e+07	12265751
High	IsMasterProtein	Q16778	Histone H2B type 2-E OS=Homo sapiens OX=9606 GN=HIST2H2BE PE=1 SV=3	0	FALSE	19.772	35	4	15	1	126	13.9	10.32	28.98	4	3	2.22324e+08	2.43308e+08	2.33925e+08
High	IsMasterProtein	Q9P0L0	Vesicle-associated membrane protein-associated protein A OS=Homo sapiens OX=9606 GN=VAPA PE=1 SV=3	0	FALSE	19.725	15	3	10	3	249	27.9	8.62	35.41	3	0	2.48799e+07	2.76871e+07	2.22594e+07
High	IsMasterProtein	O14744	Protein arginine N-methyltransferase 5 OS=Homo sapiens OX=9606 GN=PRMT5 PE=1 SV=4	0	FALSE	19.635	10	5	11	5	637	72.6	6.29	26.61	5	0	2.21562e+07	2.43004e+07	2.54014e+07
High	IsMasterProtein	Q8IZP2	Putative protein FAM10A4 OS=Homo sapiens OX=9606 GN=ST13P4 PE=5 SV=1	0	FALSE	19.599	25	5	9	5	240	27.4	5.08	19.86	5	0	2.14234e+07	2.20336e+07	2.02887e+07
High	IsMasterProtein	P61077	Ubiquitin-conjugating enzyme E2 D3 OS=Homo sapiens OX=9606 GN=UBE2D3 PE=1 SV=1	0	FALSE	19.494	40	4	12	4	147	16.7	7.8	39.24	4	0	4.12026e+07	4.38225e+07	3.85544e+07
High	IsMasterProtein	Q13151	Heterogeneous nuclear ribonucleoprotein A0 OS=Homo sapiens OX=9606 GN=HNRNPA0 PE=1 SV=1	0	FALSE	19.299	17	4	11	3	305	30.8	9.29	32.19	4	0	4.41491e+07	4.9014e+07	4.59563e+07
High	IsMasterProtein	Q9Y5K6	CD2-associated protein OS=Homo sapiens OX=9606 GN=CD2AP PE=1 SV=1	0	FALSE	18.889	8	5	6	5	639	71.4	6.4	13.74	5	0	1.78924e+07	1.8486e+07	1.89408e+07
High	IsMasterProtein	P37837	Transaldolase OS=Homo sapiens OX=9606 GN=TALDO1 PE=1 SV=2	0	FALSE	18.792	16	5	12	5	337	37.5	6.81	30.41	5	0	4.74141e+07	3.79445e+07	32666496
High	IsMasterProtein	Q16777	Histone H2A type 2-C OS=Homo sapiens OX=9606 GN=HIST2H2AC PE=1 SV=4	0	FALSE	18.691	33	4	20	4	129	14	10.9	56.99	4	0	8.05615e+07	8.1985e+07	80114265
High	IsMasterProtein	Q8WVK2	U4/U6.U5 small nuclear ribonucleoprotein 27 kDa protein OS=Homo sapiens OX=9606 GN=SNRNP27 PE=1 SV=1	0	FALSE	18.672	17	2	7	2	155	18.8	11.62	28.56	2	0	1.70208e+07	1.67225e+07	1.69588e+07
High	IsMasterProtein	Q9Y6G9	Cytoplasmic dynein 1 light intermediate chain 1 OS=Homo sapiens OX=9606 GN=DYNC1LI1 PE=1 SV=3	0	FALSE	18.66	8	3	10	3	523	56.5	6.42	26.17	3	0	1.04769e+07	1.08292e+07	9.63175e+06
High	IsMasterProtein	O43399	Tumor protein D54 OS=Homo sapiens OX=9606 GN=TPD52L2 PE=1 SV=2	0	FALSE	18.486	19	3	7	3	206	22.2	5.36	31.98	3	0	2.79383e+07	2.68661e+07	28256771
High	IsMasterProtein	Q96P70	Importin-9 OS=Homo sapiens OX=9606 GN=IPO9 PE=1 SV=3	0	FALSE	18.485	3	2	7	2	1041	115.9	4.81	19.97	2	0	1.56476e+06	2.45682e+06	1.77431e+06
High	IsMasterProtein	P55786	Puromycin-sensitive aminopeptidase OS=Homo sapiens OX=9606 GN=NPEPPS PE=1 SV=2	0	FALSE	18.391	6	4	9	4	919	103.2	5.72	22.82	4	0	1.41925e+07	1.39326e+07	1.25658e+07
High	IsMasterProtein	P49411	Elongation factor Tu, mitochondrial OS=Homo sapiens OX=9606 GN=TUFM PE=1 SV=2	0	FALSE	18.339	13	5	12	5	452	49.5	7.61	35.22	5	0	3.04607e+07	3.23337e+07	35115408
High	IsMasterProtein	P25398	40S ribosomal protein S12 OS=Homo sapiens OX=9606 GN=RPS12 PE=1 SV=3	0	FALSE	18.272	25	3	9	3	132	14.5	7.21	24.7	3	0	2.11062e+07	2.63836e+07	2.22308e+07
High	IsMasterProtein	P32119	Peroxiredoxin-2 OS=Homo sapiens OX=9606 GN=PRDX2 PE=1 SV=5	0	FALSE	18.244	35	4	12	3	198	21.9	5.97	34.83	4	0	9.62834e+06	1.26861e+07	1.01133e+07
High	IsMasterProtein	P20618	Proteasome subunit beta type-1 OS=Homo sapiens OX=9606 GN=PSMB1 PE=1 SV=2	0	FALSE	18.225	22	3	8	3	241	26.5	8.13	32.78	3	0	1.16252e+07	1.26462e+07	1.32444e+07
High	IsMasterProtein	Q13155	Aminoacyl tRNA synthase complex-interacting multifunctional protein 2 OS=Homo sapiens OX=9606 GN=AIMP2 PE=1 SV=2	0	FALSE	18.126	11	3	10	3	320	35.3	8.22	30.19	3	0	3.14251e+07	3.57745e+07	3.22774e+07
High	IsMasterProtein	Q92841-1	Isoform 2 of Probable ATP-dependent RNA helicase DDX17 OS=Homo sapiens OX=9606 GN=DDX17	0	FALSE	18.066	9	5	15	1	650	72.3	8.59	33.71	5	0	2.23624e+06	2.78869e+06	2.86644e+06
High	IsMasterProtein	O15042	U2 snRNP-associated SURP motif-containing protein OS=Homo sapiens OX=9606 GN=U2SURP PE=1 SV=2	0	FALSE	17.973	5	4	11	4	1029	118.2	8.47	30.18	4	0	1.25179e+07	1.32935e+07	1.2846e+07
High	IsMasterProtein	P07741	Adenine phosphoribosyltransferase OS=Homo sapiens OX=9606 GN=APRT PE=1 SV=2	0	FALSE	17.918	23	4	8	4	180	19.6	6.02	23.34	4	0	2.14726e+07	2.03834e+07	2.04813e+07
High	IsMasterProtein	Q9Y4P3	Transducin beta-like protein 2 OS=Homo sapiens OX=9606 GN=TBL2 PE=1 SV=1	0	FALSE	17.853	11	3	8	3	447	49.8	9.44	23.73	3	0	1.22284e+07	1.2634e+07	12623959
High	IsMasterProtein	Q16576	Histone-binding protein RBBP7 OS=Homo sapiens OX=9606 GN=RBBP7 PE=1 SV=1	0	FALSE	17.801	11	3	3	3	425	47.8	5.05	12.05	3	0	8.63311e+06	8.54068e+06	8441784
High	IsMasterProtein	Q70UQ0-4	Isoform 4 of Inhibitor of nuclear factor kappa-B kinase-interacting protein OS=Homo sapiens OX=9606 GN=IKBIP	0	FALSE	17.741	15	4	7	3	377	43.1	4.92	26.88	4	1	1.62e+07	1.30543e+07	1.73084e+07
High	IsMasterProtein	P54136	Arginine--tRNA ligase, cytoplasmic OS=Homo sapiens OX=9606 GN=RARS PE=1 SV=2	0	FALSE	17.737	8	4	8	4	660	75.3	6.68	23.5	4	0	1.52472e+07	2.00212e+07	17301837
High	IsMasterProtein	P60900	Proteasome subunit alpha type-6 OS=Homo sapiens OX=9606 GN=PSMA6 PE=1 SV=1	0	FALSE	17.701	17	3	7	3	246	27.4	6.76	22.1	3	0	2.08583e+07	2.10791e+07	2.0861e+07
High	IsMasterProtein	Q14677	Clathrin interactor 1 OS=Homo sapiens OX=9606 GN=CLINT1 PE=1 SV=1	0	FALSE	17.575	7	3	8	3	625	68.2	6.42	28.1	3	0	1.8093e+07	1.76909e+07	18621730
High	IsMasterProtein	Q96N67	Dedicator of cytokinesis protein 7 OS=Homo sapiens OX=9606 GN=DOCK7 PE=1 SV=4	0	FALSE	17.343	2	3	5	3	2140	242.4	6.8	18.9	3	0	3.12219e+06	8.10827e+06	7.94875e+06
High	IsMasterProtein	Q7Z4H7	HAUS augmin-like complex subunit 6 OS=Homo sapiens OX=9606 GN=HAUS6 PE=1 SV=2	0	FALSE	17.279	5	4	7	4	955	108.6	6.47	16.93	4	0	1.52293e+07	1.51691e+07	1.49475e+07
High	IsMasterProtein	O43809	Cleavage and polyadenylation specificity factor subunit 5 OS=Homo sapiens OX=9606 GN=NUDT21 PE=1 SV=1	0	FALSE	17.259	22	4	10	4	227	26.2	8.82	31.12	4	0	3.21567e+07	3.06216e+07	3.23909e+07
High	IsMasterProtein	O00303	Eukaryotic translation initiation factor 3 subunit F OS=Homo sapiens OX=9606 GN=EIF3F PE=1 SV=1	0	FALSE	17.246	12	3	7	3	357	37.5	5.45	24.93	3	0	1.60812e+07	1.52903e+07	1.51395e+07
High	IsMasterProtein	Q9Y295	Developmentally-regulated GTP-binding protein 1 OS=Homo sapiens OX=9606 GN=DRG1 PE=1 SV=1	0	FALSE	17.195	12	3	8	3	367	40.5	8.9	23.69	3	0	2.3274e+07	2.40361e+07	2.52314e+07
High	IsMasterProtein	P50402	Emerin OS=Homo sapiens OX=9606 GN=EMD PE=1 SV=1	0	FALSE	17.112	17	3	8	3	254	29	5.5	24	3	0	1.78147e+07	1.94322e+07	1.91236e+07
High	IsMasterProtein	Q5JRA6	Transport and Golgi organization protein 1 homolog OS=Homo sapiens OX=9606 GN=MIA3 PE=1 SV=1	0	FALSE	17.003	4	5	9	5	1907	213.6	4.84	28.9	5	0	2.00365e+07	2.20542e+07	1.76708e+07
High	IsMasterProtein	Q12931	Heat shock protein 75 kDa, mitochondrial OS=Homo sapiens OX=9606 GN=TRAP1 PE=1 SV=3	0	FALSE	16.957	4	2	4	1	704	80.1	8.21	12.33	2	0	3.33111e+06	3.46188e+06	3.3018e+06
High	IsMasterProtein	P27708	CAD protein OS=Homo sapiens OX=9606 GN=CAD PE=1 SV=3	0	FALSE	16.937	3	5	9	5	2225	242.8	6.46	26.41	5	0	1.83773e+07	1.7391e+07	16250981
High	IsMasterProtein	P30533	Alpha-2-macroglobulin receptor-associated protein OS=Homo sapiens OX=9606 GN=LRPAP1 PE=1 SV=1	0	FALSE	16.816	8	3	10	3	357	41.4	8.78	25.9	3	0	4.36389e+07	4.93914e+07	43395637
High	IsMasterProtein	Q9P035	Very-long-chain (3R)-3-hydroxyacyl-CoA dehydratase 3 OS=Homo sapiens OX=9606 GN=HACD3 PE=1 SV=2	0	FALSE	16.711	16	4	11	4	362	43.1	8.94	31.22	4	0	3.49614e+07	3.45907e+07	35772246
High	IsMasterProtein	P23284	Peptidyl-prolyl cis-trans isomerase B OS=Homo sapiens OX=9606 GN=PPIB PE=1 SV=2	0	FALSE	16.663	27	7	18	6	216	23.7	9.41	38.76	7	1	9.66066e+07	8.24603e+07	8.27903e+07
High	IsMasterProtein	P17858	ATP-dependent 6-phosphofructokinase, liver type OS=Homo sapiens OX=9606 GN=PFKL PE=1 SV=6	0	FALSE	16.375	6	4	7	4	780	85	7.5	20.07	4	0	1.23077e+07	1.04524e+07	1.03721e+07
High	IsMasterProtein	P16615	Sarcoplasmic/endoplasmic reticulum calcium ATPase 2 OS=Homo sapiens OX=9606 GN=ATP2A2 PE=1 SV=1	0	FALSE	16.369	4	3	5	3	1042	114.7	5.34	17.36	3	0	5.65274e+07	5.1579e+07	56426367
High	IsMasterProtein	O00567	Nucleolar protein 56 OS=Homo sapiens OX=9606 GN=NOP56 PE=1 SV=4	0	FALSE	16.255	7	4	7	4	594	66	9.19	16.6	4	0	9.38208e+06	9.50812e+06	9.61334e+06
High	IsMasterProtein	P61221	ATP-binding cassette sub-family E member 1 OS=Homo sapiens OX=9606 GN=ABCE1 PE=1 SV=1	0	FALSE	16.187	8	4	5	4	599	67.3	8.34	14.98	4	0	1.86721e+07	2.19599e+07	13994003
High	IsMasterProtein	O75494	Serine/arginine-rich splicing factor 10 OS=Homo sapiens OX=9606 GN=SRSF10 PE=1 SV=1	0	FALSE	16.155	11	2	8	2	262	31.3	11.27	28.07	2	0	3.00295e+07	2.72876e+07	27814451
High	IsMasterProtein	O95232	Luc7-like protein 3 OS=Homo sapiens OX=9606 GN=LUC7L3 PE=1 SV=2	0	FALSE	15.97	10	4	7	4	432	51.4	9.79	12.48	4	0	1.4304e+07	1.67193e+07	1.58217e+07
High	IsMasterProtein	Q01081	Splicing factor U2AF 35 kDa subunit OS=Homo sapiens OX=9606 GN=U2AF1 PE=1 SV=3	0	FALSE	15.954	14	3	8	3	240	27.9	8.81	25.39	3	0	3.32012e+07	3.53245e+07	3.3785e+07
High	IsMasterProtein	P11766	Alcohol dehydrogenase class-3 OS=Homo sapiens OX=9606 GN=ADH5 PE=1 SV=4	0	FALSE	15.939	15	3	6	3	374	39.7	7.49	20.2	3	0	1.50572e+07	1.13993e+07	15794951
High	IsMasterProtein	P62266	40S ribosomal protein S23 OS=Homo sapiens OX=9606 GN=RPS23 PE=1 SV=3	0	FALSE	15.937	35	3	6	3	143	15.8	10.49	20.13	3	0	1.71485e+07	1.80912e+07	1.89392e+07
High	IsMasterProtein	Q5JTH9	RRP12-like protein OS=Homo sapiens OX=9606 GN=RRP12 PE=1 SV=2	0	FALSE	15.835	3	3	5	3	1297	143.6	8.75	15.35	3	0	5.21767e+06	5.02976e+06	4.99811e+06
High	IsMasterProtein	P61011	Signal recognition particle 54 kDa protein OS=Homo sapiens OX=9606 GN=SRP54 PE=1 SV=1	0	FALSE	15.799	11	5	12	5	504	55.7	8.75	28.98	5	0	4.96315e+07	6.44057e+07	6.35291e+07
High	IsMasterProtein	P00387	NADH-cytochrome b5 reductase 3 OS=Homo sapiens OX=9606 GN=CYB5R3 PE=1 SV=3	0	FALSE	15.781	17	4	10	4	301	34.2	7.59	29.26	4	0	1.45219e+07	1.51717e+07	1.49042e+07
High	IsMasterProtein	Q9BWD1	Acetyl-CoA acetyltransferase, cytosolic OS=Homo sapiens OX=9606 GN=ACAT2 PE=1 SV=2	0	FALSE	15.761	12	4	8	4	397	41.3	6.92	23.67	4	0	2.04753e+07	1.86241e+07	19804692
High	IsMasterProtein	P62873	Guanine nucleotide-binding protein G(I)/G(S)/G(T) subunit beta-1 OS=Homo sapiens OX=9606 GN=GNB1 PE=1 SV=3	0	FALSE	15.756	11	3	9	3	340	37.4	6	27.61	3	0	2.28142e+07	2.34122e+07	2.09952e+07
High	IsMasterProtein	P49189	4-trimethylaminobutyraldehyde dehydrogenase OS=Homo sapiens OX=9606 GN=ALDH9A1 PE=1 SV=3	0	FALSE	15.545	10	5	12	5	494	53.8	5.87	25.73	5	0	3.46478e+07	4.18298e+07	34309556
High	IsMasterProtein	P62851	40S ribosomal protein S25 OS=Homo sapiens OX=9606 GN=RPS25 PE=1 SV=1	0	FALSE	15.481	30	5	17	5	125	13.7	10.11	36.53	5	0	7.03085e+07	8.38463e+07	82948601
High	IsMasterProtein	P49069	Calcium signal-modulating cyclophilin ligand OS=Homo sapiens OX=9606 GN=CAMLG PE=1 SV=1	0	FALSE	15.385	14	3	8	3	296	32.9	8.05	23.51	3	0	1.56779e+07	1.83243e+07	19808528
High	IsMasterProtein	P25205	DNA replication licensing factor MCM3 OS=Homo sapiens OX=9606 GN=MCM3 PE=1 SV=3	0	FALSE	15.374	5	4	9	4	808	90.9	5.77	23.86	4	0	1.18336e+07	1.2056e+07	1.25179e+07
High	IsMasterProtein	Q15019	Septin-2 OS=Homo sapiens OX=9606 GN=SEPTIN2 PE=1 SV=1	0	FALSE	15.346	13	4	8	4	361	41.5	6.6	21.59	4	0	1.7189e+07	1.50963e+07	1.38842e+07
High	IsMasterProtein	P25788	Proteasome subunit alpha type-3 OS=Homo sapiens OX=9606 GN=PSMA3 PE=1 SV=2	0	FALSE	15.316	13	3	9	3	255	28.4	5.33	20.69	3	0	5.47677e+07	5.42201e+07	20335366
High	IsMasterProtein	P18124	60S ribosomal protein L7 OS=Homo sapiens OX=9606 GN=RPL7 PE=1 SV=1	0	FALSE	15.289	24	5	13	5	248	29.2	10.65	34.47	5	0	2.91649e+07	3.09601e+07	2.69697e+07
High	IsMasterProtein	O15371	Eukaryotic translation initiation factor 3 subunit D OS=Homo sapiens OX=9606 GN=EIF3D PE=1 SV=1	0	FALSE	15.28	7	3	9	3	548	63.9	6.05	32.54	3	0	2.4144e+07	2.57602e+07	22483407
High	IsMasterProtein	O00154	Cytosolic acyl coenzyme A thioester hydrolase OS=Homo sapiens OX=9606 GN=ACOT7 PE=1 SV=3	0	FALSE	15.253	7	2	6	2	380	41.8	8.54	17.74	2	0	1.40862e+07	1.28075e+07	1.17966e+07
High	IsMasterProtein	Q9H2U2	Inorganic pyrophosphatase 2, mitochondrial OS=Homo sapiens OX=9606 GN=PPA2 PE=1 SV=2	0	FALSE	15.23	11	3	6	3	334	37.9	7.39	13.35	3	0	8.61351e+06	9.21106e+06	9.49022e+06
High	IsMasterProtein	Q14008	Cytoskeleton-associated protein 5 OS=Homo sapiens OX=9606 GN=CKAP5 PE=1 SV=3	0	FALSE	15.141	3	5	8	5	2032	225.4	7.8	21.1	5	0	1.38659e+07	1.60596e+07	1.39473e+07
High	IsMasterProtein	P00367	Glutamate dehydrogenase 1, mitochondrial OS=Homo sapiens OX=9606 GN=GLUD1 PE=1 SV=2	0	FALSE	15.119	9	4	9	4	558	61.4	7.8	23.56	4	0	1.92655e+07	2.07128e+07	21376920
High	IsMasterProtein	A0FGR8	Extended synaptotagmin-2 OS=Homo sapiens OX=9606 GN=ESYT2 PE=1 SV=1	0	FALSE	15.097	4	3	8	3	921	102.3	9.26	29.52	3	0	8.23231e+06	9.19123e+06	8.84296e+06
High	IsMasterProtein	P24539	ATP synthase F(0) complex subunit B1, mitochondrial OS=Homo sapiens OX=9606 GN=ATP5PB PE=1 SV=2	0	FALSE	14.845	11	2	8	2	256	28.9	9.36	25.68	2	0	1.01391e+07	1.07609e+07	9.14087e+06
High	IsMasterProtein	P21796	Voltage-dependent anion-selective channel protein 1 OS=Homo sapiens OX=9606 GN=VDAC1 PE=1 SV=2	0	FALSE	14.757	16	4	10	3	283	30.8	8.54	25.06	4	0	1.50868e+07	1.57359e+07	1.41652e+07
High	IsMasterProtein	Q6NXE6	Armadillo repeat-containing protein 6 OS=Homo sapiens OX=9606 GN=ARMC6 PE=1 SV=2	0	FALSE	14.732	9	4	9	4	501	54.1	6.24	23.8	4	0	3.60606e+07	3.92036e+07	2.74292e+07
High	IsMasterProtein	P43487	Ran-specific GTPase-activating protein OS=Homo sapiens OX=9606 GN=RANBP1 PE=1 SV=1	0	FALSE	14.61	20	3	5	3	201	23.3	5.29	19.98	3	0	2.6788e+07	2.8987e+07	30351401
High	IsMasterProtein	O43432	Eukaryotic translation initiation factor 4 gamma 3 OS=Homo sapiens OX=9606 GN=EIF4G3 PE=1 SV=2	0	FALSE	14.208	2	3	7	2	1585	176.5	5.38	16.85	3	0	2.70792e+06	2.57078e+06	2.59969e+06
High	IsMasterProtein	P47756-2	Isoform 2 of F-actin-capping protein subunit beta OS=Homo sapiens OX=9606 GN=CAPZB	0	FALSE	14.038	14	3	6	3	272	30.6	6	19.9	3	0	1.81097e+07	1.89416e+07	1.84e+07
High	IsMasterProtein	Q14839	Chromodomain-helicase-DNA-binding protein 4 OS=Homo sapiens OX=9606 GN=CHD4 PE=1 SV=2	0	FALSE	13.99	3	4	6	4	1912	217.9	5.86	14.26	4	0	7.65507e+06	6.58341e+06	9.68119e+06
High	IsMasterProtein	O14967	Calmegin OS=Homo sapiens OX=9606 GN=CLGN PE=1 SV=1	0	FALSE	13.835	7	4	12	3	610	70	4.69	19.33	4	0	9.47745e+06	1.07155e+07	1.05217e+07
High	IsMasterProtein	Q02978	Mitochondrial 2-oxoglutarate/malate carrier protein OS=Homo sapiens OX=9606 GN=SLC25A11 PE=1 SV=3	0	FALSE	13.772	13	4	11	4	314	34	9.91	29.21	4	0	1.87664e+07	1.84376e+07	1.9801e+07
High	IsMasterProtein	P52732	Kinesin-like protein KIF11 OS=Homo sapiens OX=9606 GN=KIF11 PE=1 SV=2	0	FALSE	13.757	4	3	5	3	1056	119.1	5.64	14.44	3	0	4.86709e+06	5.38699e+06	3.41612e+06
High	IsMasterProtein	O75844	CAAX prenyl protease 1 homolog OS=Homo sapiens OX=9606 GN=ZMPSTE24 PE=1 SV=2	0	FALSE	13.735	9	3	5	3	475	54.8	7.49	16.94	3	0	9.71642e+06	9.95183e+06	9.10105e+06
High	IsMasterProtein	P12268	Inosine-5'-monophosphate dehydrogenase 2 OS=Homo sapiens OX=9606 GN=IMPDH2 PE=1 SV=2	0	FALSE	13.647	7	3	5	3	514	55.8	6.9	16.59	3	0	4.24948e+07	3.42705e+07	3.77595e+07
High	IsMasterProtein	P55036	26S proteasome non-ATPase regulatory subunit 4 OS=Homo sapiens OX=9606 GN=PSMD4 PE=1 SV=1	0	FALSE	13.636	10	3	7	3	377	40.7	4.79	21.06	3	0	1.36008e+07	1.34152e+07	1.43393e+07
High	IsMasterProtein	P40939	Trifunctional enzyme subunit alpha, mitochondrial OS=Homo sapiens OX=9606 GN=HADHA PE=1 SV=2	0	FALSE	13.545	5	2	5	2	763	82.9	9.04	21.61	2	0	7.51104e+06	6.83959e+06	6997865
High	IsMasterProtein	P00491	Purine nucleoside phosphorylase OS=Homo sapiens OX=9606 GN=PNP PE=1 SV=2	0	FALSE	13.505	13	3	6	3	289	32.1	6.95	16.02	3	0	8.60795e+06	8.4553e+06	5.15977e+06
High	IsMasterProtein	Q15758	Neutral amino acid transporter B(0) OS=Homo sapiens OX=9606 GN=SLC1A5 PE=1 SV=2	0	FALSE	13.473	5	2	4	2	541	56.6	5.48	17.18	2	0	8.14538e+06	9.15251e+06	7.87513e+06
High	IsMasterProtein	P52907	F-actin-capping protein subunit alpha-1 OS=Homo sapiens OX=9606 GN=CAPZA1 PE=1 SV=3	0	FALSE	13.45	19	3	6	3	286	32.9	5.69	19.69	3	0	1.08106e+07	1.12824e+07	1.22068e+07
High	IsMasterProtein	P42704	Leucine-rich PPR motif-containing protein, mitochondrial OS=Homo sapiens OX=9606 GN=LRPPRC PE=1 SV=3	0	FALSE	13.366	3	3	5	3	1394	157.8	6.13	12.88	3	0	9.99057e+06	7.10039e+06	7.41898e+06
High	IsMasterProtein	P62249	40S ribosomal protein S16 OS=Homo sapiens OX=9606 GN=RPS16 PE=1 SV=2	0	FALSE	13.365	36	6	14	6	146	16.4	10.21	32.12	6	0	8.99513e+07	8.4988e+07	9.23832e+07
High	IsMasterProtein	P40763	Signal transducer and activator of transcription 3 OS=Homo sapiens OX=9606 GN=STAT3 PE=1 SV=2	0	FALSE	13.281	7	3	6	3	770	88	6.3	12.64	3	0	7.63622e+06	8.18951e+06	8226422
High	IsMasterProtein	P29401	Transketolase OS=Homo sapiens OX=9606 GN=TKT PE=1 SV=3	0	FALSE	13.239	8	3	5	3	623	67.8	7.66	17.6	3	0	9.86214e+06	9.87419e+06	9.13357e+06
High	IsMasterProtein	Q9NRN7	L-aminoadipate-semialdehyde dehydrogenase-phosphopantetheinyl transferase OS=Homo sapiens OX=9606 GN=AASDHPPT PE=1 SV=2	0	FALSE	13.205	7	2	6	2	309	35.8	6.8	14.12	2	0	2.64927e+07	2.87029e+07	2.98859e+07
High	IsMasterProtein	Q02543	60S ribosomal protein L18a OS=Homo sapiens OX=9606 GN=RPL18A PE=1 SV=2	0	FALSE	13.199	17	3	9	3	176	20.7	10.71	20.73	3	0	2.56175e+07	2.06523e+07	2.44744e+07
High	IsMasterProtein	O60841	Eukaryotic translation initiation factor 5B OS=Homo sapiens OX=9606 GN=EIF5B PE=1 SV=4	0	FALSE	13.124	2	2	7	2	1220	138.7	5.49	21.07	2	0	8.25522e+06	7.72475e+06	7.16736e+06
High	IsMasterProtein	Q13501	Sequestosome-1 OS=Homo sapiens OX=9606 GN=SQSTM1 PE=1 SV=1	0	FALSE	13.085	3	2	5	2	440	47.7	5.22	20.79	2	0	5.83712e+06	6.86004e+06	6396644
High	IsMasterProtein	O43242	26S proteasome non-ATPase regulatory subunit 3 OS=Homo sapiens OX=9606 GN=PSMD3 PE=1 SV=2	0	FALSE	13.061	7	3	7	3	534	60.9	8.44	19.47	3	0	1.33951e+07	1.34862e+07	13018798
High	IsMasterProtein	P61981	14-3-3 protein gamma OS=Homo sapiens OX=9606 GN=YWHAG PE=1 SV=2	0	FALSE	13.049	18	4	18	1	247	28.3	4.89	30.58	4	0	682512	967986	432316
High	IsMasterProtein	Q5VYK3	Proteasome adapter and scaffold protein ECM29 OS=Homo sapiens OX=9606 GN=ECPAS PE=1 SV=2	0	FALSE	13.015	2	2	2	2	1845	204.2	7.12	5.48	2	0	833982	1.0739e+06	376260
High	IsMasterProtein	Q9H9A6	Leucine-rich repeat-containing protein 40 OS=Homo sapiens OX=9606 GN=LRRC40 PE=1 SV=1	0	FALSE	13.006	6	2	3	2	602	68.2	6.43	10.45	2	0
High	IsMasterProtein	Q15185	Prostaglandin E synthase 3 OS=Homo sapiens OX=9606 GN=PTGES3 PE=1 SV=1	0	FALSE	13.004	23	3	8	3	160	18.7	4.54	17.54	3	0	1.32007e+07	1.44861e+07	1.3661e+07
High	IsMasterProtein	P33992	DNA replication licensing factor MCM5 OS=Homo sapiens OX=9606 GN=MCM5 PE=1 SV=5	0	FALSE	12.941	7	4	5	4	734	82.2	8.37	13.6	4	0	2.06525e+07	1.91558e+07	19100433
High	IsMasterProtein	Q9NVI7	ATPase family AAA domain-containing protein 3A OS=Homo sapiens OX=9606 GN=ATAD3A PE=1 SV=2	0	FALSE	12.868	5	3	5	3	634	71.3	8.98	12.72	3	0	9.0122e+06	9.62834e+06	1.05586e+07
High	IsMasterProtein	Q5JPE7	Nodal modulator 2 OS=Homo sapiens OX=9606 GN=NOMO2 PE=1 SV=1	0	FALSE	12.81	3	3	9	3	1267	139.4	5.76	24.91	3	0	1.10342e+07	1.12396e+07	1.07637e+07
High	IsMasterProtein	Q9ULV4	Coronin-1C OS=Homo sapiens OX=9606 GN=CORO1C PE=1 SV=1	0	FALSE	12.807	7	3	5	3	474	53.2	7.08	16.83	3	0	1.20136e+07	1.26517e+07	1.20822e+07
High	IsMasterProtein	Q66PJ3	ADP-ribosylation factor-like protein 6-interacting protein 4 OS=Homo sapiens OX=9606 GN=ARL6IP4 PE=1 SV=2	0	FALSE	12.791	7	2	5	2	421	44.9	10.93	18.53	2	0	7.59055e+06	9.45779e+06	8.15034e+06
High	IsMasterProtein	P31948	Stress-induced-phosphoprotein 1 OS=Homo sapiens OX=9606 GN=STIP1 PE=1 SV=1	0	FALSE	12.791	6	2	4	2	543	62.6	6.8	16.02	2	0	6.54669e+06	7.08058e+06	6.66531e+06
High	IsMasterProtein	Q7Z6Z7	E3 ubiquitin-protein ligase HUWE1 OS=Homo sapiens OX=9606 GN=HUWE1 PE=1 SV=3	0	FALSE	12.787	1	4	6	4	4374	481.6	5.22	15.33	4	0	3.96563e+06	3.42502e+06	4.41112e+06
High	IsMasterProtein	P60228	Eukaryotic translation initiation factor 3 subunit E OS=Homo sapiens OX=9606 GN=EIF3E PE=1 SV=1	0	FALSE	12.76	9	4	11	4	445	52.2	6.04	20.19	4	0	2.14362e+07	2.16493e+07	2.30763e+07
High	IsMasterProtein	P62888	60S ribosomal protein L30 OS=Homo sapiens OX=9606 GN=RPL30 PE=1 SV=2	0	FALSE	12.753	24	2	4	2	115	12.8	9.63	12.17	2	0	9.50077e+06	8.78307e+06	9.15232e+06
High	IsMasterProtein	O75131	Copine-3 OS=Homo sapiens OX=9606 GN=CPNE3 PE=1 SV=1	0	FALSE	12.71	6	3	8	3	537	60.1	5.85	19.34	3	0	4.18652e+06	4.74465e+06	6.43666e+06
High	IsMasterProtein	P61326	Protein mago nashi homolog OS=Homo sapiens OX=9606 GN=MAGOH PE=1 SV=1	0	FALSE	12.706	26	3	7	3	146	17.2	6.11	21.19	3	0	1.27608e+07	1.68074e+07	1.52474e+07
High	IsMasterProtein	Q02790	Peptidyl-prolyl cis-trans isomerase FKBP4 OS=Homo sapiens OX=9606 GN=FKBP4 PE=1 SV=3	0	FALSE	12.68	8	3	7	3	459	51.8	5.43	22.35	3	0	1.37314e+07	1.30628e+07	6.99915e+06
High	IsMasterProtein	P43246	DNA mismatch repair protein Msh2 OS=Homo sapiens OX=9606 GN=MSH2 PE=1 SV=1	0	FALSE	12.664	4	3	6	3	934	104.7	5.77	16.37	3	0	3.59473e+06	4.11572e+06	3.62665e+06
High	IsMasterProtein	Q9H3N1	Thioredoxin-related transmembrane protein 1 OS=Homo sapiens OX=9606 GN=TMX1 PE=1 SV=1	0	FALSE	12.662	12	3	7	3	280	31.8	4.98	13.85	3	0	2.61208e+07	2.45735e+07	2.52279e+07
High	IsMasterProtein	Q96FW1	Ubiquitin thioesterase OTUB1 OS=Homo sapiens OX=9606 GN=OTUB1 PE=1 SV=2	0	FALSE	12.656	15	4	10	4	271	31.3	4.94	19.2	4	0	2.36274e+07	2.40026e+07	23877303
High	IsMasterProtein	P06730	Eukaryotic translation initiation factor 4E OS=Homo sapiens OX=9606 GN=EIF4E PE=1 SV=2	0	FALSE	12.646	18	4	7	4	217	25.1	6.15	6.58	4	0	1.16681e+07	6.47019e+06	1.23144e+07
High	IsMasterProtein	P49755	Transmembrane emp24 domain-containing protein 10 OS=Homo sapiens OX=9606 GN=TMED10 PE=1 SV=2	0	FALSE	12.645	10	2	9	2	219	25	7.44	23.81	2	0	4.28319e+07	4.99393e+07	44989587
High	IsMasterProtein	Q15738	Sterol-4-alpha-carboxylate 3-dehydrogenase, decarboxylating OS=Homo sapiens OX=9606 GN=NSDHL PE=1 SV=2	0	FALSE	12.589	11	2	4	2	373	41.9	8.06	16.01	2	0	3.25717e+06	3.43369e+06	3.18099e+06
High	IsMasterProtein	Q8NCW5	NAD(P)H-hydrate epimerase OS=Homo sapiens OX=9606 GN=NAXE PE=1 SV=2	0	FALSE	12.583	20	4	5	4	288	31.7	7.66	9.2	4	0	1.84698e+07	2.12826e+07	1.93071e+07
High	IsMasterProtein	O95793	Double-stranded RNA-binding protein Staufen homolog 1 OS=Homo sapiens OX=9606 GN=STAU1 PE=1 SV=2	0	FALSE	12.572	8	3	7	3	577	63.1	9.44	17.83	3	0	1.28438e+07	1.33229e+07	1.25545e+07
High	IsMasterProtein	Q4VCS5	Angiomotin OS=Homo sapiens OX=9606 GN=AMOT PE=1 SV=1	0	FALSE	12.57	4	4	5	4	1084	118	7.64	11.45	4	0	2.34882e+07	2.37556e+07	2.28227e+07
High	IsMasterProtein	P07910	Heterogeneous nuclear ribonucleoproteins C1/C2 OS=Homo sapiens OX=9606 GN=HNRNPC PE=1 SV=4	0	FALSE	12.556	11	3	9	3	306	33.7	5.08	22.06	3	0	2.14971e+07	2.1104e+07	1.92455e+07
High	IsMasterProtein	O14929	Histone acetyltransferase type B catalytic subunit OS=Homo sapiens OX=9606 GN=HAT1 PE=1 SV=1	0	FALSE	12.532	11	4	5	4	419	49.5	5.69	12.97	4	0	1.93609e+07	1.98221e+07	1.41156e+07
High	IsMasterProtein	Q12972	Nuclear inhibitor of protein phosphatase 1 OS=Homo sapiens OX=9606 GN=PPP1R8 PE=1 SV=2	0	FALSE	12.514	12	2	4	2	351	38.5	7.37	20.72	2	0	6.73204e+06	7.17853e+06	5.80684e+06
High	IsMasterProtein	P59998	Actin-related protein 2/3 complex subunit 4 OS=Homo sapiens OX=9606 GN=ARPC4 PE=1 SV=3	0	FALSE	12.489	21	4	11	4	168	19.7	8.43	27.66	4	0	2.86636e+07	2.90712e+07	29644451
High	IsMasterProtein	P61160	Actin-related protein 2 OS=Homo sapiens OX=9606 GN=ACTR2 PE=1 SV=1	0	FALSE	12.476	11	4	5	4	394	44.7	6.74	10.15	4	0	1.35087e+07	1.58566e+07	1.36892e+07
High	IsMasterProtein	P46783	40S ribosomal protein S10 OS=Homo sapiens OX=9606 GN=RPS10 PE=1 SV=1	0	FALSE	12.46	22	4	9	4	165	18.9	10.15	25.59	4	0	1.5057e+07	1.22483e+07	1.15012e+07
High	IsMasterProtein	O76094	Signal recognition particle subunit SRP72 OS=Homo sapiens OX=9606 GN=SRP72 PE=1 SV=3	0	FALSE	12.422	6	2	6	2	671	74.6	9.26	20.5	2	0	3.2444e+06	3.46608e+06	3.17974e+06
High	IsMasterProtein	P27694	Replication protein A 70 kDa DNA-binding subunit OS=Homo sapiens OX=9606 GN=RPA1 PE=1 SV=2	0	FALSE	12.419	6	3	3	3	616	68.1	7.21	9.59	3	0	1.41481e+07	1.35061e+07	1.34763e+07
High	IsMasterProtein	Q9BXJ9	N-alpha-acetyltransferase 15, NatA auxiliary subunit OS=Homo sapiens OX=9606 GN=NAA15 PE=1 SV=1	0	FALSE	12.375	4	4	7	4	866	101.2	7.42	17.65	4	0	1.66202e+07	1.76836e+07	1.73524e+07
High	IsMasterProtein	Q12905	Interleukin enhancer-binding factor 2 OS=Homo sapiens OX=9606 GN=ILF2 PE=1 SV=2	0	FALSE	12.348	10	3	6	3	390	43	5.26	18.51	3	0	1.16998e+07	1.30821e+07	1.39285e+07
High	IsMasterProtein	O00151	PDZ and LIM domain protein 1 OS=Homo sapiens OX=9606 GN=PDLIM1 PE=1 SV=4	0	FALSE	12.27	12	3	5	3	329	36	7.02	16.55	3	0	8.66494e+06	7.67387e+06	7.69337e+06
High	IsMasterProtein	P01889	HLA class I histocompatibility antigen, B alpha chain OS=Homo sapiens OX=9606 GN=HLA-B PE=1 SV=3	0	FALSE	12.257	8	2	3	2	362	40.4	5.85	11.1	2	0	8.13237e+06	8.5094e+06	7814304
High	IsMasterProtein	Q8TCG1	Protein CIP2A OS=Homo sapiens OX=9606 GN=CIP2A PE=1 SV=2	0	FALSE	12.183	7	5	9	5	905	102.1	6.23	24.2	5	0	2.42435e+07	2.65252e+07	23190093
High	IsMasterProtein	P46776	60S ribosomal protein L27a OS=Homo sapiens OX=9606 GN=RPL27A PE=1 SV=2	0	FALSE	12.071	30	4	9	4	148	16.6	11	23.87	4	0	4.58172e+07	4.45504e+07	4.35318e+07
High	IsMasterProtein	Q96FJ2	Dynein light chain 2, cytoplasmic OS=Homo sapiens OX=9606 GN=DYNLL2 PE=1 SV=1	0	FALSE	12.062	26	2	8	2	89	10.3	7.37	23.15	2	0	2.22749e+07	1.72834e+07	1.98802e+07
High	IsMasterProtein	P08195	4F2 cell-surface antigen heavy chain OS=Homo sapiens OX=9606 GN=SLC3A2 PE=1 SV=3	0	FALSE	12.06	5	2	3	2	630	68	5.01	13.45	2	0	7.7938e+06	8.40938e+06	8.415e+06
High	IsMasterProtein	Q96DI7	U5 small nuclear ribonucleoprotein 40 kDa protein OS=Homo sapiens OX=9606 GN=SNRNP40 PE=1 SV=1	0	FALSE	12.053	15	3	5	3	357	39.3	8.1	12.44	3	0	1.30524e+07	1.32509e+07	1.38774e+07
High	IsMasterProtein	P61081	NEDD8-conjugating enzyme Ubc12 OS=Homo sapiens OX=9606 GN=UBE2M PE=1 SV=1	0	FALSE	12.043	21	4	11	4	183	20.9	7.69	18.53	4	0	2.00447e+07	1.9681e+07	1.90777e+07
High	IsMasterProtein	O00232	26S proteasome non-ATPase regulatory subunit 12 OS=Homo sapiens OX=9606 GN=PSMD12 PE=1 SV=3	0	FALSE	12.014	5	2	5	2	456	52.9	7.65	11.29	2	0	1.25114e+07	1.30049e+07	1.32124e+07
High	IsMasterProtein	P30153	Serine/threonine-protein phosphatase 2A 65 kDa regulatory subunit A alpha isoform OS=Homo sapiens OX=9606 GN=PPP2R1A PE=1 SV=4	0	FALSE	12.006	6	2	4	2	589	65.3	5.11	13.11	2	0	3.24675e+06	3.31076e+06	3.24857e+06
High	IsMasterProtein	Q99700	Ataxin-2 OS=Homo sapiens OX=9606 GN=ATXN2 PE=1 SV=2	0	FALSE	11.977	3	2	6	2	1313	140.2	9.57	26.19	2	0	6.93223e+06	7.38478e+06	6.82326e+06
High	IsMasterProtein	O43776	Asparagine--tRNA ligase, cytoplasmic OS=Homo sapiens OX=9606 GN=NARS1 PE=1 SV=1	0	FALSE	11.871	10	5	11	5	548	62.9	6.25	24.38	5	0	2.36576e+07	2.52694e+07	2.47589e+07
High	IsMasterProtein	P31153	S-adenosylmethionine synthase isoform type-2 OS=Homo sapiens OX=9606 GN=MAT2A PE=1 SV=1	0	FALSE	11.856	9	2	4	2	395	43.6	6.48	16.97	2	0	6.69986e+06	7.23171e+06	6331457
High	IsMasterProtein	Q9HAV4	Exportin-5 OS=Homo sapiens OX=9606 GN=XPO5 PE=1 SV=1	0	FALSE	11.757	2	2	5	2	1204	136.2	5.8	11.45	2	0	1.8684e+07	3.31811e+06	1.94594e+07
High	IsMasterProtein	O95757	Heat shock 70 kDa protein 4L OS=Homo sapiens OX=9606 GN=HSPA4L PE=1 SV=3	0	FALSE	11.725	5	3	5	2	839	94.5	5.88	13.14	3	0	1.997e+06	1.8562e+06	1.76817e+06
High	IsMasterProtein	Q9NTK5	Obg-like ATPase 1 OS=Homo sapiens OX=9606 GN=OLA1 PE=1 SV=2	0	FALSE	11.713	12	3	5	3	396	44.7	7.81	11.14	3	0	7.65271e+06	7.33377e+06	6.2834e+06
High	IsMasterProtein	O60762	Dolichol-phosphate mannosyltransferase subunit 1 OS=Homo sapiens OX=9606 GN=DPM1 PE=1 SV=1	0	FALSE	11.586	13	2	4	2	260	29.6	9.57	15.36	2	0	7.02459e+06	7.59017e+06	8.2939e+06
High	IsMasterProtein	P0DN79	Cystathionine beta-synthase-like protein OS=Homo sapiens OX=9606 GN=CBSL PE=1 SV=1	0	FALSE	11.581	11	4	6	4	551	60.5	6.65	16.92	4	0	3.01381e+07	3.05201e+07	2.97446e+07
High	IsMasterProtein	P51572	B-cell receptor-associated protein 31 OS=Homo sapiens OX=9606 GN=BCAP31 PE=1 SV=3	0	FALSE	11.567	15	4	10	4	246	28	8.44	26.78	4	0	3.91137e+07	5.2103e+07	4.08456e+07
High	IsMasterProtein	Q96CS3	FAS-associated factor 2 OS=Homo sapiens OX=9606 GN=FAF2 PE=1 SV=2	0	FALSE	11.542	9	3	3	3	445	52.6	5.62	8.66	3	0	3.85035e+06	4.51141e+06	10377561
High	IsMasterProtein	Q7L2J0	7SK snRNA methylphosphate capping enzyme OS=Homo sapiens OX=9606 GN=MEPCE PE=1 SV=1	0	FALSE	11.529	4	2	3	2	689	74.3	9.57	7.74	2	0	7.15096e+06	7.25697e+06	6.00184e+06
High	IsMasterProtein	P62995	Transformer-2 protein homolog beta OS=Homo sapiens OX=9606 GN=TRA2B PE=1 SV=1	0	FALSE	11.524	14	3	4	3	288	33.6	11.25	7.96	3	0	5.45539e+06	6.43108e+06	6.66304e+06
High	IsMasterProtein	Q15369	Elongin-C OS=Homo sapiens OX=9606 GN=ELOC PE=1 SV=1	0	FALSE	11.519	21	2	5	2	112	12.5	4.78	17.07	2	0	2.12092e+07	2.15103e+07	1.93206e+07
High	IsMasterProtein	P48739	Phosphatidylinositol transfer protein beta isoform OS=Homo sapiens OX=9606 GN=PITPNB PE=1 SV=2	0	FALSE	11.496	16	3	7	3	271	31.5	6.87	24.9	3	0	1.3799e+07	1.44162e+07	1.56309e+07
High	IsMasterProtein	Q92747	Actin-related protein 2/3 complex subunit 1A OS=Homo sapiens OX=9606 GN=ARPC1A PE=2 SV=2	0	FALSE	11.487	8	2	2	2	370	41.5	8.18	6.79	2	0	7.78143e+06	8.73364e+06	8797070
High	IsMasterProtein	P36542	ATP synthase subunit gamma, mitochondrial OS=Homo sapiens OX=9606 GN=ATP5F1C PE=1 SV=1	0	FALSE	11.391	11	3	6	3	298	33	9.22	17.63	3	0	1.86285e+07	2.09912e+07	1.86454e+07
High	IsMasterProtein	Q9Y3F4	Serine-threonine kinase receptor-associated protein OS=Homo sapiens OX=9606 GN=STRAP PE=1 SV=1	0	FALSE	11.373	15	4	7	4	350	38.4	5.12	18.21	4	0	2.11182e+07	1.99572e+07	2.16229e+07
High	IsMasterProtein	P11172	Uridine 5'-monophosphate synthase OS=Homo sapiens OX=9606 GN=UMPS PE=1 SV=1	0	FALSE	11.316	9	4	8	4	480	52.2	7.24	12.33	4	0	1.85118e+07	1.92491e+07	1.9868e+07
High	IsMasterProtein	Q9H6S0	3'-5' RNA helicase YTHDC2 OS=Homo sapiens OX=9606 GN=YTHDC2 PE=1 SV=2	0	FALSE	11.316	3	4	8	4	1430	160.1	8.4	19.58	4	0	1.79899e+07	1.72234e+07	17000976
High	IsMasterProtein	P23921	Ribonucleoside-diphosphate reductase large subunit OS=Homo sapiens OX=9606 GN=RRM1 PE=1 SV=1	0	FALSE	11.296	4	2	4	2	792	90	7.15	14.35	2	0	9.06144e+06	8.30167e+06	8.38708e+06
High	IsMasterProtein	Q9Y230	RuvB-like 2 OS=Homo sapiens OX=9606 GN=RUVBL2 PE=1 SV=3	0	FALSE	11.257	8	3	6	3	463	51.1	5.64	18.05	3	0	1.00413e+07	1.06149e+07	9.38377e+06
High	IsMasterProtein	P55196-1	Isoform 2 of Afadin OS=Homo sapiens OX=9606 GN=AFDN	0	FALSE	11.2	2	3	7	3	1816	205.5	6.77	21.18	3	0	1.47355e+07	1.62688e+07	1.56779e+07
High	IsMasterProtein	P62854	40S ribosomal protein S26 OS=Homo sapiens OX=9606 GN=RPS26 PE=1 SV=3	0	FALSE	11.175	29	3	9	3	115	13	11	25.59	3	0	4.15135e+07	4.54674e+07	4.35825e+07
High	IsMasterProtein	O95573	Long-chain-fatty-acid--CoA ligase 3 OS=Homo sapiens OX=9606 GN=ACSL3 PE=1 SV=3	0	FALSE	11.126	7	4	7	4	720	80.4	8.38	17.63	4	0	1.26379e+07	1.24223e+07	1.32457e+07
High	IsMasterProtein	Q8NBU5	ATPase family AAA domain-containing protein 1 OS=Homo sapiens OX=9606 GN=ATAD1 PE=1 SV=1	0	FALSE	11.048	12	3	5	3	361	40.7	6.9	13.97	3	0	6.15796e+06	6.18931e+06	6.19538e+06
High	IsMasterProtein	O75251	NADH dehydrogenase [ubiquinone] iron-sulfur protein 7, mitochondrial OS=Homo sapiens OX=9606 GN=NDUFS7 PE=1 SV=3	0	FALSE	11.018	17	2	5	2	213	23.5	9.99	15.42	2	0	6.35835e+06	6.68636e+06	6.07911e+06
High	IsMasterProtein	P12814	Alpha-actinin-1 OS=Homo sapiens OX=9606 GN=ACTN1 PE=1 SV=2	0	FALSE	10.97	2	2	5	2	892	103	5.41	15.33	2	0	5.62198e+06	5.73346e+06	4.93089e+06
High	IsMasterProtein	Q6ZXV5	Protein O-mannosyl-transferase TMTC3 OS=Homo sapiens OX=9606 GN=TMTC3 PE=1 SV=2	0	FALSE	10.948	5	3	6	3	915	103.9	8.87	13.21	3	0	7.76786e+06	7.80924e+06	7.92226e+06
High	IsMasterProtein	P00492	Hypoxanthine-guanine phosphoribosyltransferase OS=Homo sapiens OX=9606 GN=HPRT1 PE=1 SV=2	0	FALSE	10.922	14	3	7	3	218	24.6	6.68	15.96	3	0	1.85975e+07	1.83811e+07	17717602
High	IsMasterProtein	P30876	DNA-directed RNA polymerase II subunit RPB2 OS=Homo sapiens OX=9606 GN=POLR2B PE=1 SV=1	0	FALSE	10.846	3	4	9	4	1174	133.8	6.87	22.71	4	0	1.96032e+07	2.06437e+07	2.69058e+07
High	IsMasterProtein	Q00535	Cyclin-dependent-like kinase 5 OS=Homo sapiens OX=9606 GN=CDK5 PE=1 SV=3	0	FALSE	10.844	12	4	9	3	292	33.3	7.66	18.99	4	0	1.37491e+07	1.44568e+07	13529713
High	IsMasterProtein	Q15942	Zyxin OS=Homo sapiens OX=9606 GN=ZYX PE=1 SV=1	0	FALSE	10.825	5	2	5	2	572	61.2	6.67	17	2	0	7.08339e+06	8.01608e+06	8.00909e+06
High	IsMasterProtein	Q15555	Microtubule-associated protein RP/EB family member 2 OS=Homo sapiens OX=9606 GN=MAPRE2 PE=1 SV=1	0	FALSE	10.798	9	2	4	2	327	37	5.57	12.3	2	0	2.12639e+06	2.38886e+06	2440634
High	IsMasterProtein	Q08752	Peptidyl-prolyl cis-trans isomerase D OS=Homo sapiens OX=9606 GN=PPID PE=1 SV=3	0	FALSE	10.718	7	2	3	2	370	40.7	7.21	8.78	2	0	9.53543e+06	8.88731e+06	9.26384e+06
High	IsMasterProtein	Q07960	Rho GTPase-activating protein 1 OS=Homo sapiens OX=9606 GN=ARHGAP1 PE=1 SV=1	0	FALSE	10.692	9	3	6	3	439	50.4	6.29	17.27	3	0	9.96083e+06	1.14174e+07	1.09418e+07
High	IsMasterProtein	P25789	Proteasome subunit alpha type-4 OS=Homo sapiens OX=9606 GN=PSMA4 PE=1 SV=1	0	FALSE	10.469	9	2	4	2	261	29.5	7.72	13.35	2	0	9.98077e+06	9.94204e+06	9.52982e+06
High	IsMasterProtein	O76041-2	Isoform 2 of Nebulette OS=Homo sapiens OX=9606 GN=NEBL	0	FALSE	10.449	12	3	3	3	270	31.2	8.31	8.31	3	0	1.74289e+07	1.81007e+07	1.64412e+07
High	IsMasterProtein	Q07020	60S ribosomal protein L18 OS=Homo sapiens OX=9606 GN=RPL18 PE=1 SV=2	0	FALSE	10.439	18	3	9	3	188	21.6	11.72	24.14	3	0	4.40932e+07	3.78634e+07	4.01274e+07
High	IsMasterProtein	Q15046	Lysine--tRNA ligase OS=Homo sapiens OX=9606 GN=KARS1 PE=1 SV=3	0	FALSE	10.416	5	3	5	3	597	68	6.35	15.81	3	0	1.04767e+07	9.75587e+06	1.0929e+07
High	IsMasterProtein	Q92499	ATP-dependent RNA helicase DDX1 OS=Homo sapiens OX=9606 GN=DDX1 PE=1 SV=2	0	FALSE	10.403	5	2	6	2	740	82.4	7.23	14.83	2	0	1.6027e+06	1.15274e+06	1.54227e+06
High	IsMasterProtein	Q9H7C9	Mth938 domain-containing protein OS=Homo sapiens OX=9606 GN=AAMDC PE=1 SV=1	0	FALSE	10.326	29	3	9	3	122	13.3	8.46	25.32	3	0	2.40375e+07	2.73994e+07	28504097
High	IsMasterProtein	Q9Y6M1	Insulin-like growth factor 2 mRNA-binding protein 2 OS=Homo sapiens OX=9606 GN=IGF2BP2 PE=1 SV=2	0	FALSE	10.313	4	2	6	1	599	66.1	8.46	17.83	2	0	4.01859e+06	5.52701e+06	5.2185e+06
High	IsMasterProtein	P55209	Nucleosome assembly protein 1-like 1 OS=Homo sapiens OX=9606 GN=NAP1L1 PE=1 SV=1	0	FALSE	10.277	10	3	5	3	391	45.3	4.46	11.65	3	0	5.60278e+06	5.83838e+06	5141080
High	IsMasterProtein	P35998	26S proteasome regulatory subunit 7 OS=Homo sapiens OX=9606 GN=PSMC2 PE=1 SV=3	0	FALSE	10.263	6	2	6	2	433	48.6	5.95	17.23	2	0	7.85228e+06	8.36367e+06	8.13144e+06
High	IsMasterProtein	Q14318	Peptidyl-prolyl cis-trans isomerase FKBP8 OS=Homo sapiens OX=9606 GN=FKBP8 PE=1 SV=2	0	FALSE	10.211	7	2	6	2	412	44.5	4.84	19.89	2	0	7.39784e+06	9.70889e+06	8798383
High	IsMasterProtein	Q9UNM6	26S proteasome non-ATPase regulatory subunit 13 OS=Homo sapiens OX=9606 GN=PSMD13 PE=1 SV=2	0	FALSE	10.174	6	2	5	2	376	42.9	5.81	12.37	2	0	5.44766e+06	5.54661e+06	5.3909e+06
High	IsMasterProtein	O60493	Sorting nexin-3 OS=Homo sapiens OX=9606 GN=SNX3 PE=1 SV=3	0	FALSE	10.173	11	2	7	2	162	18.8	8.66	10.59	2	0	2.12654e+07	2.36975e+07	1.98359e+07
High	IsMasterProtein	P62277	40S ribosomal protein S13 OS=Homo sapiens OX=9606 GN=RPS13 PE=1 SV=2	0	FALSE	10.073	18	2	5	2	151	17.2	10.54	14.76	2	0	8.78073e+06	8.54206e+06	8.2474e+06
High	IsMasterProtein	O14980	Exportin-1 OS=Homo sapiens OX=9606 GN=XPO1 PE=1 SV=1	0	FALSE	9.986	4	3	6	3	1071	123.3	6.06	17.48	3	0	9.51125e+06	9.50781e+06	8.5325e+06
High	IsMasterProtein	Q04726	Transducin-like enhancer protein 3 OS=Homo sapiens OX=9606 GN=TLE3 PE=1 SV=2	0	FALSE	9.974	4	3	6	3	772	83.4	7.2	13.54	3	0	1.39001e+07	1.43699e+07	1.22993e+07
High	IsMasterProtein	P84098	60S ribosomal protein L19 OS=Homo sapiens OX=9606 GN=RPL19 PE=1 SV=1	0	FALSE	9.947	14	2	6	2	196	23.5	11.47	15.49	2	0	6.40403e+06	6.88681e+06	7.73752e+06
High	IsMasterProtein	P51149	Ras-related protein Rab-7a OS=Homo sapiens OX=9606 GN=RAB7A PE=1 SV=1	0	FALSE	9.848	12	2	4	2	207	23.5	6.7	13.32	2	0	9.01619e+06	9.22274e+06	9.69315e+06
High	IsMasterProtein	Q9HB71	Calcyclin-binding protein OS=Homo sapiens OX=9606 GN=CACYBP PE=1 SV=2	0	FALSE	9.769	17	3	7	3	228	26.2	8.25	23.16	3	0	1.69687e+07	1.61922e+07	1.71765e+07
High	IsMasterProtein	P06748	Nucleophosmin OS=Homo sapiens OX=9606 GN=NPM1 PE=1 SV=2	0	FALSE	9.76	9	3	5	3	294	32.6	4.78	11.4	3	0	5.51152e+07	6.71379e+07	6.23179e+07
High	IsMasterProtein	P55084	Trifunctional enzyme subunit beta, mitochondrial OS=Homo sapiens OX=9606 GN=HADHB PE=1 SV=3	0	FALSE	9.718	8	3	6	3	474	51.3	9.41	15.3	3	0	1.12017e+07	1.12015e+07	1.32906e+07
High	IsMasterProtein	P26599	Polypyrimidine tract-binding protein 1 OS=Homo sapiens OX=9606 GN=PTBP1 PE=1 SV=1	0	FALSE	9.647	9	3	6	3	531	57.2	9.17	17.53	3	0	1.12798e+07	1.36544e+07	1.34217e+07
High	IsMasterProtein	P08559	Pyruvate dehydrogenase E1 component subunit alpha, somatic form, mitochondrial OS=Homo sapiens OX=9606 GN=PDHA1 PE=1 SV=3	0	FALSE	9.567	10	4	9	4	390	43.3	8.06	19.23	4	0	1.03228e+08	9.89797e+07	9.8142e+07
High	IsMasterProtein	Q9Y266	Nuclear migration protein nudC OS=Homo sapiens OX=9606 GN=NUDC PE=1 SV=1	0	FALSE	9.547	8	2	3	2	331	38.2	5.38	7.59	2	0	1.11521e+07	1.06416e+07	10816156
High	IsMasterProtein	Q9Y2L1	Exosome complex exonuclease RRP44 OS=Homo sapiens OX=9606 GN=DIS3 PE=1 SV=2	0	FALSE	9.503	3	2	6	2	958	108.9	7.14	14.15	2	0	7.91269e+06	8.7478e+06	8.61374e+06
High	IsMasterProtein	P40429	60S ribosomal protein L13a OS=Homo sapiens OX=9606 GN=RPL13A PE=1 SV=2	0	FALSE	9.435	19	5	12	5	203	23.6	10.93	23.83	5	0	3.94448e+07	4.25643e+07	4.16235e+07
High	IsMasterProtein	P62263	40S ribosomal protein S14 OS=Homo sapiens OX=9606 GN=RPS14 PE=1 SV=3	0	FALSE	9.432	14	2	9	2	151	16.3	10.05	22.02	2	0	2.66799e+07	2.34314e+07	21555642
High	IsMasterProtein	P08133	Annexin A6 OS=Homo sapiens OX=9606 GN=ANXA6 PE=1 SV=3	0	FALSE	9.412	4	3	9	3	673	75.8	5.6	17.04	3	0	1.27414e+07	1.35111e+07	1.31906e+07
High	IsMasterProtein	Q13586	Stromal interaction molecule 1 OS=Homo sapiens OX=9606 GN=STIM1 PE=1 SV=3	0	FALSE	9.391	6	4	8	4	685	77.4	6.67	18.53	4	0	1.60422e+07	1.82181e+07	1.80594e+07
High	IsMasterProtein	Q7L2E3	ATP-dependent RNA helicase DHX30 OS=Homo sapiens OX=9606 GN=DHX30 PE=1 SV=1	0	FALSE	9.342	2	2	4	2	1194	133.9	8.78	12.54	2	0	664678	7.11173e+06	7.29068e+06
High	IsMasterProtein	P62820	Ras-related protein Rab-1A OS=Homo sapiens OX=9606 GN=RAB1A PE=1 SV=3	0	FALSE	9.264	13	2	7	1	205	22.7	6.21	19.26	2	0	4.62192e+06	4.63049e+06	5.30063e+06
High	IsMasterProtein	Q6YN16	Hydroxysteroid dehydrogenase-like protein 2 OS=Homo sapiens OX=9606 GN=HSDL2 PE=1 SV=1	0	FALSE	9.2	7	2	3	2	418	45.4	7.99	5.1	2	0	7.08484e+06	6.77313e+06	5.89429e+06
High	IsMasterProtein	P48444	Coatomer subunit delta OS=Homo sapiens OX=9606 GN=ARCN1 PE=1 SV=1	0	FALSE	9.184	6	3	7	3	511	57.2	6.21	15.32	3	0	1.35783e+07	1.00265e+07	9.19998e+06
High	IsMasterProtein	P26640	Valine--tRNA ligase OS=Homo sapiens OX=9606 GN=VARS PE=1 SV=4	0	FALSE	9.118	3	2	3	2	1264	140.4	7.59	10.56	2	0	4.60243e+06	4.87781e+06	5.01215e+06
High	IsMasterProtein	Q9BVC6	Transmembrane protein 109 OS=Homo sapiens OX=9606 GN=TMEM109 PE=1 SV=1	0	FALSE	9.104	5	2	6	2	243	26.2	10.48	17.23	2	0	1.78056e+07	1.87648e+07	1.9625e+07
High	IsMasterProtein	P59190	Ras-related protein Rab-15 OS=Homo sapiens OX=9606 GN=RAB15 PE=1 SV=1	0	FALSE	9.002	10	2	6	1	212	24.4	5.71	14.45	2	1	3.52675e+07	3.78084e+07	32788121
High	IsMasterProtein	O60749	Sorting nexin-2 OS=Homo sapiens OX=9606 GN=SNX2 PE=1 SV=2	0	FALSE	8.964	5	2	4	1	519	58.4	5.12	7.64	2	0	3.60323e+06	3.51981e+06	3473401
High	IsMasterProtein	O60568	Multifunctional procollagen lysine hydroxylase and glycosyltransferase LH3 OS=Homo sapiens OX=9606 GN=PLOD3 PE=1 SV=1	0	FALSE	8.921	4	2	2	2	738	84.7	6.05	6.94	2	0	3.52063e+06	2.7319e+06	2.96164e+06
High	IsMasterProtein	Q9HDC9	Adipocyte plasma membrane-associated protein OS=Homo sapiens OX=9606 GN=APMAP PE=1 SV=2	0	FALSE	8.819	6	2	5	2	416	46.5	6.16	14.16	2	0	1.36471e+07	1.41182e+07	7.52236e+06
High	IsMasterProtein	P30040	Endoplasmic reticulum resident protein 29 OS=Homo sapiens OX=9606 GN=ERP29 PE=1 SV=4	0	FALSE	8.791	10	2	4	2	261	29	7.31	7	2	0	5.39485e+06	6.01214e+06	5743464
High	IsMasterProtein	P23246	Splicing factor, proline- and glutamine-rich OS=Homo sapiens OX=9606 GN=SFPQ PE=1 SV=2	0	FALSE	8.754	3	2	6	1	707	76.1	9.44	15.46	2	0	1.91406e+06	2.6187e+06	2.17187e+06
High	IsMasterProtein	Q9Y679	Ancient ubiquitous protein 1 OS=Homo sapiens OX=9606 GN=AUP1 PE=1 SV=2	0	FALSE	8.685	6	2	4	2	410	45.8	8.65	7.38	2	0	7.40122e+06	7.28505e+06	7.34242e+06
High	IsMasterProtein	P49915	GMP synthase [glutamine-hydrolyzing] OS=Homo sapiens OX=9606 GN=GMPS PE=1 SV=1	0	FALSE	8.633	4	3	9	3	693	76.7	6.87	22.35	3	0	7.20524e+06	8.72985e+06	8.42208e+06
High	IsMasterProtein	P57678	Gem-associated protein 4 OS=Homo sapiens OX=9606 GN=GEMIN4 PE=1 SV=2	0	FALSE	8.59	2	2	4	2	1058	120	6.04	9.3	2	0	1.0145e+07	1.24184e+07	1.07746e+07
High	IsMasterProtein	P28070	Proteasome subunit beta type-4 OS=Homo sapiens OX=9606 GN=PSMB4 PE=1 SV=4	0	FALSE	8.583	10	3	7	3	264	29.2	5.97	7.23	3	0	2.42675e+07	2.59534e+07	25690678
High	IsMasterProtein	P39748	Flap endonuclease 1 OS=Homo sapiens OX=9606 GN=FEN1 PE=1 SV=1	0	FALSE	8.57	7	2	4	2	380	42.6	8.62	12.04	2	0	8.7023e+06	7.35742e+06	7.27857e+06
High	IsMasterProtein	Q9H0U3	Magnesium transporter protein 1 OS=Homo sapiens OX=9606 GN=MAGT1 PE=1 SV=1	0	FALSE	8.549	9	3	6	3	335	38	9.63	15.29	3	0	1.78898e+07	1.70707e+07	9.76343e+06
High	IsMasterProtein	Q96HS1	Serine/threonine-protein phosphatase PGAM5, mitochondrial OS=Homo sapiens OX=9606 GN=PGAM5 PE=1 SV=2	0	FALSE	8.526	10	3	7	3	289	32	8.68	18.23	3	0	1.82e+07	1.92738e+07	2.05191e+07
High	IsMasterProtein	Q9UM00	Calcium load-activated calcium channel OS=Homo sapiens OX=9606 GN=TMCO1 PE=1 SV=2	0	FALSE	8.522	10	2	4	2	239	27.1	10.26	13.7	2	0	1.42053e+07	1.46542e+07	1.47518e+07
High	IsMasterProtein	P15531	Nucleoside diphosphate kinase A OS=Homo sapiens OX=9606 GN=NME1 PE=1 SV=1	0	FALSE	8.483	24	3	6	1	152	17.1	6.19	16.61	3	0	2.82249e+06	2.66446e+06	3326535
High	IsMasterProtein	P07737	Profilin-1 OS=Homo sapiens OX=9606 GN=PFN1 PE=1 SV=2	0	FALSE	8.479	24	3	6	3	140	15	8.27	7.5	3	0	2.08495e+07	2.26235e+07	21640064
High	IsMasterProtein	P26196	Probable ATP-dependent RNA helicase DDX6 OS=Homo sapiens OX=9606 GN=DDX6 PE=1 SV=2	0	FALSE	8.465	6	2	2	2	483	54.4	8.66	7.53	2	0	6.49365e+06	7.52935e+06	6928296
High	IsMasterProtein	P49821	NADH dehydrogenase [ubiquinone] flavoprotein 1, mitochondrial OS=Homo sapiens OX=9606 GN=NDUFV1 PE=1 SV=4	0	FALSE	8.455	8	2	4	2	464	50.8	8.21	10.79	2	0	5.12894e+06	5.32795e+06	4.2767e+06
High	IsMasterProtein	O00506	Serine/threonine-protein kinase 25 OS=Homo sapiens OX=9606 GN=STK25 PE=1 SV=1	0	FALSE	8.44	5	2	4	2	426	48.1	6.74	7.07	2	0	2.74917e+06	3.13406e+06	3.1028e+06
High	IsMasterProtein	P08134	Rho-related GTP-binding protein RhoC OS=Homo sapiens OX=9606 GN=RHOC PE=1 SV=1	0	FALSE	8.423	13	2	4	2	193	22	6.58	12.86	2	0	4.02454e+06	3.58801e+06	3.77043e+06
High	IsMasterProtein	O00429	Dynamin-1-like protein OS=Homo sapiens OX=9606 GN=DNM1L PE=1 SV=2	0	FALSE	8.359	5	2	3	2	736	81.8	6.81	10.72	2	0	2.26017e+06	2.74618e+06	2.67046e+06
High	IsMasterProtein	P51659	Peroxisomal multifunctional enzyme type 2 OS=Homo sapiens OX=9606 GN=HSD17B4 PE=1 SV=3	0	FALSE	8.357	4	2	5	2	736	79.6	8.84	17.3	2	0	5.12835e+06	5.34048e+06	5.64012e+06
High	IsMasterProtein	Q9BVK6	Transmembrane emp24 domain-containing protein 9 OS=Homo sapiens OX=9606 GN=TMED9 PE=1 SV=2	0	FALSE	8.273	10	3	10	3	235	27.3	8.02	19.28	3	0	5.91705e+07	6.16763e+07	53914997
High	IsMasterProtein	Q16822	Phosphoenolpyruvate carboxykinase [GTP], mitochondrial OS=Homo sapiens OX=9606 GN=PCK2 PE=1 SV=4	0	FALSE	8.257	4	2	3	2	640	70.7	7.62	6.9	2	0	2.97629e+06	2.93664e+06	2708557
High	IsMasterProtein	Q9UMR2	ATP-dependent RNA helicase DDX19B OS=Homo sapiens OX=9606 GN=DDX19B PE=1 SV=1	0	FALSE	8.181	4	2	4	2	479	53.9	6.3	10.75	2	0	4.38274e+06	4.46681e+06	5.13804e+06
High	IsMasterProtein	O75821	Eukaryotic translation initiation factor 3 subunit G OS=Homo sapiens OX=9606 GN=EIF3G PE=1 SV=2	0	FALSE	8.157	12	2	2	2	320	35.6	6.13	7.1	2	0	3.22023e+06	7.37786e+06	5.91027e+06
High	IsMasterProtein	P60866	40S ribosomal protein S20 OS=Homo sapiens OX=9606 GN=RPS20 PE=1 SV=1	0	FALSE	8.153	20	2	5	2	119	13.4	9.94	19.37	2	0	7.40235e+06	6.63174e+06	6.20739e+06
High	IsMasterProtein	P61006	Ras-related protein Rab-8A OS=Homo sapiens OX=9606 GN=RAB8A PE=1 SV=1	0	FALSE	8.124	13	2	6	1	207	23.7	9.07	15.98	2	0		493353	1.3376e+06
High	IsMasterProtein	O14979	Heterogeneous nuclear ribonucleoprotein D-like OS=Homo sapiens OX=9606 GN=HNRNPDL PE=1 SV=3	0	FALSE	8.123	6	2	2	2	420	46.4	9.57	5	2	0	9.69605e+06	9.86825e+06	9.00608e+06
High	IsMasterProtein	P19367	Hexokinase-1 OS=Homo sapiens OX=9606 GN=HK1 PE=1 SV=3	0	FALSE	8.115	3	2	5	2	917	102.4	6.8	14.36	2	0	4.68084e+06	4.96537e+06	5.1959e+06
High	IsMasterProtein	Q15717	ELAV-like protein 1 OS=Homo sapiens OX=9606 GN=ELAVL1 PE=1 SV=2	0	FALSE	8.104	7	3	5	3	326	36.1	9.17	10.85	3	0	1.17929e+07	1.03993e+07	1.02275e+07
High	IsMasterProtein	Q9Y2X3	Nucleolar protein 58 OS=Homo sapiens OX=9606 GN=NOP58 PE=1 SV=1	0	FALSE	8.08	4	2	6	2	529	59.5	8.92	15.39	2	0	8.69002e+06	8.03237e+06	7.51928e+06
High	IsMasterProtein	P21266	Glutathione S-transferase Mu 3 OS=Homo sapiens OX=9606 GN=GSTM3 PE=1 SV=3	0	FALSE	7.98	15	2	3	2	225	26.5	5.54	7.56	2	0	781815	828543	367870
High	IsMasterProtein	Q99598	Translin-associated protein X OS=Homo sapiens OX=9606 GN=TSNAX PE=1 SV=1	0	FALSE	7.966	14	3	5	3	290	33.1	6.55	9.79	3	0	8.80524e+06	7.94909e+06	8.77443e+06
High	IsMasterProtein	Q9Y3I0	tRNA-splicing ligase RtcB homolog OS=Homo sapiens OX=9606 GN=RTCB PE=1 SV=1	0	FALSE	7.962	5	2	6	2	505	55.2	7.23	19.4	2	0	8.01293e+06	7.68286e+06	7541682
High	IsMasterProtein	O60256	Phosphoribosyl pyrophosphate synthase-associated protein 2 OS=Homo sapiens OX=9606 GN=PRPSAP2 PE=1 SV=1	0	FALSE	7.936	8	2	4	2	369	40.9	7.44	12.31	2	0	6.66259e+06	6.15644e+06	6059052
High	IsMasterProtein	P22392-2	Isoform 3 of Nucleoside diphosphate kinase B OS=Homo sapiens OX=9606 GN=NME2	0	FALSE	7.901	20	4	9	2	267	30.1	8.92	21.32	4	2	2.77053e+07	2.7927e+07	28758493
High	IsMasterProtein	Q9NSV4	Protein diaphanous homolog 3 OS=Homo sapiens OX=9606 GN=DIAPH3 PE=1 SV=4	0	FALSE	7.883	2	2	3	2	1193	136.8	7.03	8.25	2	0	2.6094e+06	2.29078e+06	2548565
High	IsMasterProtein	Q9BT09	Protein canopy homolog 3 OS=Homo sapiens OX=9606 GN=CNPY3 PE=1 SV=1	0	FALSE	7.815	9	2	4	2	278	30.7	5.49	13.5	2	0	6.6605e+06	6.66582e+06	7226565
High	IsMasterProtein	Q16795	NADH dehydrogenase [ubiquinone] 1 alpha subcomplex subunit 9, mitochondrial OS=Homo sapiens OX=9606 GN=NDUFA9 PE=1 SV=2	0	FALSE	7.797	8	2	3	2	377	42.5	9.8	5.7	2	0	3.4549e+06	3.62797e+06	418706
High	IsMasterProtein	P46940	Ras GTPase-activating-like protein IQGAP1 OS=Homo sapiens OX=9606 GN=IQGAP1 PE=1 SV=1	0	FALSE	7.601	2	2	2	2	1657	189.1	6.48	4.73	2	0	3.00235e+06	2.69754e+06	3027799
High	IsMasterProtein	P55145	Mesencephalic astrocyte-derived neurotrophic factor OS=Homo sapiens OX=9606 GN=MANF PE=1 SV=3	0	FALSE	7.593	18	3	8	3	182	20.7	8.69	19.48	3	0	1.86472e+07	1.8417e+07	2.0143e+07
High	IsMasterProtein	P31930	Cytochrome b-c1 complex subunit 1, mitochondrial OS=Homo sapiens OX=9606 GN=UQCRC1 PE=1 SV=3	0	FALSE	7.575	5	2	5	2	480	52.6	6.37	13.34	2	0	9.51984e+06	1.10771e+07	8.99824e+06
High	IsMasterProtein	Q05519	Serine/arginine-rich splicing factor 11 OS=Homo sapiens OX=9606 GN=SRSF11 PE=1 SV=1	0	FALSE	7.568	5	2	5	2	484	53.5	10.52	10.93	2	0	1.01486e+07	9.32588e+06	11307716
High	IsMasterProtein	P30048	Thioredoxin-dependent peroxide reductase, mitochondrial OS=Homo sapiens OX=9606 GN=PRDX3 PE=1 SV=3	0	FALSE	7.53	9	2	6	2	256	27.7	7.78	13.43	2	0	8.15799e+06	7.50975e+06	7981544
High	IsMasterProtein	P62269	40S ribosomal protein S18 OS=Homo sapiens OX=9606 GN=RPS18 PE=1 SV=3	0	FALSE	7.505	16	3	9	3	152	17.7	10.99	20.63	3	0	1.74643e+07	1.73817e+07	17690451
High	IsMasterProtein	Q99615	DnaJ homolog subfamily C member 7 OS=Homo sapiens OX=9606 GN=DNAJC7 PE=1 SV=2	0	FALSE	7.489	5	2	4	2	494	56.4	6.96	14.12	2	0	9.24662e+06	1.04176e+07	9727810
High	IsMasterProtein	Q9BXB4	Oxysterol-binding protein-related protein 11 OS=Homo sapiens OX=9606 GN=OSBPL11 PE=1 SV=2	0	FALSE	7.467	3	2	4	2	747	83.6	7.06	10.33	2	0	4.29105e+06	7.07101e+06	6762078
High	IsMasterProtein	Q9NWB6	Arginine and glutamate-rich protein 1 OS=Homo sapiens OX=9606 GN=ARGLU1 PE=1 SV=1	0	FALSE	7.275	8	3	12	3	273	33.2	10.35	24.76	3	0	1.29518e+08	1.37866e+08	133014702
High	IsMasterProtein	Q09666	Neuroblast differentiation-associated protein AHNAK OS=Homo sapiens OX=9606 GN=AHNAK PE=1 SV=2	0	FALSE	7.261	3	2	5	2	5890	628.7	6.15	14.36	2	0	1.11803e+07	1.15875e+07	10325046
High	IsMasterProtein	P57088	Transmembrane protein 33 OS=Homo sapiens OX=9606 GN=TMEM33 PE=1 SV=2	0	FALSE	7.231	9	2	2	2	247	28	9.7	6.54	2	0	1.58777e+07	1.37225e+07	1.58631e+07
High	IsMasterProtein	Q13907	Isopentenyl-diphosphate Delta-isomerase 1 OS=Homo sapiens OX=9606 GN=IDI1 PE=1 SV=2	0	FALSE	7.138	9	2	4	2	227	26.3	6.34	9.82	2	0	6.65517e+06	6.32958e+06	6.71093e+06
High	IsMasterProtein	Q99426	Tubulin-folding cofactor B OS=Homo sapiens OX=9606 GN=TBCB PE=1 SV=2	0	FALSE	7.102	9	2	3	2	244	27.3	5.15	9.21	2	0	8.73754e+06	8.48372e+06	8.463e+06
High	IsMasterProtein	Q10567	AP-1 complex subunit beta-1 OS=Homo sapiens OX=9606 GN=AP1B1 PE=1 SV=2	0	FALSE	7.027	4	2	2	2	949	104.6	5.06	5.91	2	0	3.72373e+06	3.79657e+06	3.32054e+06
High	IsMasterProtein	O60684	Importin subunit alpha-7 OS=Homo sapiens OX=9606 GN=KPNA6 PE=1 SV=1	0	FALSE	7	5	3	5	3	536	60	4.98	10.41	3	0	1.19828e+07	1.22543e+07	1.15086e+07
High	IsMasterProtein	Q92973	Transportin-1 OS=Homo sapiens OX=9606 GN=TNPO1 PE=1 SV=2	0	FALSE	6.995	3	3	8	3	898	102.3	4.98	9.4	3	0	1.01397e+07	1.09342e+07	9.90491e+06
High	IsMasterProtein	Q92900	Regulator of nonsense transcripts 1 OS=Homo sapiens OX=9606 GN=UPF1 PE=1 SV=2	0	FALSE	6.988	2	2	5	2	1129	124.3	6.61	12.74	2	0	6.02395e+06	6.03877e+06	6.53694e+06
High	IsMasterProtein	O75381	Peroxisomal membrane protein PEX14 OS=Homo sapiens OX=9606 GN=PEX14 PE=1 SV=1	0	FALSE	6.924	7	2	6	2	377	41.2	4.94	20.15	2	0	5.24951e+06	5.84439e+06	5.65114e+06
High	IsMasterProtein	Q9UNX4	WD repeat-containing protein 3 OS=Homo sapiens OX=9606 GN=WDR3 PE=1 SV=1	0	FALSE	6.919	3	2	2	2	943	106	6.64	5.41	2	0	2.9222e+06	2.90883e+06	2.86804e+06
High	IsMasterProtein	P33991	DNA replication licensing factor MCM4 OS=Homo sapiens OX=9606 GN=MCM4 PE=1 SV=5	0	FALSE	6.839	3	2	2	2	863	96.5	6.74	5.96	2	0	5.89115e+06	5.70762e+06	5.35491e+06
High	IsMasterProtein	P62318	Small nuclear ribonucleoprotein Sm D3 OS=Homo sapiens OX=9606 GN=SNRPD3 PE=1 SV=1	0	FALSE	6.793	15	2	6	2	126	13.9	10.32	16.41	2	0	1.27695e+07	1.22319e+07	11693480
High	IsMasterProtein	P46459	Vesicle-fusing ATPase OS=Homo sapiens OX=9606 GN=NSF PE=1 SV=3	0	FALSE	6.72	3	2	2	2	744	82.5	6.95	5.27	2	0	4.9367e+06	5.12796e+06	4.54721e+06
High	IsMasterProtein	Q13547	Histone deacetylase 1 OS=Homo sapiens OX=9606 GN=HDAC1 PE=1 SV=1	0	FALSE	6.682	4	2	2	1	482	55.1	5.48	4.51	2	0	3.25061e+06	3.13719e+06	3.04917e+06
High	IsMasterProtein	P14678	Small nuclear ribonucleoprotein-associated proteins B and B' OS=Homo sapiens OX=9606 GN=SNRPB PE=1 SV=2	0	FALSE	6.654	7	2	7	2	240	24.6	11.19	16.26	2	0	2.15349e+07	2.07852e+07	1.96028e+07
High	IsMasterProtein	Q9NPI6	mRNA-decapping enzyme 1A OS=Homo sapiens OX=9606 GN=DCP1A PE=1 SV=3	0	FALSE	6.653	5	2	3	2	582	63.2	6.25	8.4	2	0	4.43323e+06	660645	368128
High	IsMasterProtein	P61619	Protein transport protein Sec61 subunit alpha isoform 1 OS=Homo sapiens OX=9606 GN=SEC61A1 PE=1 SV=2	0	FALSE	6.586	4	2	3	1	476	52.2	8.06	6.4	2	0	1.24345e+07	1.13407e+07	12279011
High	IsMasterProtein	Q9H9S3	Protein transport protein Sec61 subunit alpha isoform 2 OS=Homo sapiens OX=9606 GN=SEC61A2 PE=2 SV=3	0	FALSE	6.542	6	2	3	1	476	52.2	8.06	6.27	2	0
High	IsMasterProtein	Q92625	Ankyrin repeat and SAM domain-containing protein 1A OS=Homo sapiens OX=9606 GN=ANKS1A PE=1 SV=4	0	FALSE	6.518	2	2	3	2	1134	123	6.38	5.34	2	0	2.51553e+06	2.94723e+06	2.32414e+06
High	IsMasterProtein	P55884	Eukaryotic translation initiation factor 3 subunit B OS=Homo sapiens OX=9606 GN=EIF3B PE=1 SV=3	0	FALSE	6.475	3	2	2	2	814	92.4	5	5.33	2	0	6.15535e+06	5.93032e+06	6182519
High	IsMasterProtein	P10155	60 kDa SS-A/Ro ribonucleoprotein OS=Homo sapiens OX=9606 GN=RO60 PE=1 SV=2	0	FALSE	6.462	4	2	2	2	538	60.6	8.03	3.34	2	0	6.73365e+06	6.87617e+06	6.88778e+06
High	IsMasterProtein	P51991	Heterogeneous nuclear ribonucleoprotein A3 OS=Homo sapiens OX=9606 GN=HNRNPA3 PE=1 SV=2	0	FALSE	6.453	7	2	5	1	378	39.6	9.01	17.89	2	0	4.0617e+06	3.98098e+06	4537232
High	IsMasterProtein	O14641	Segment polarity protein dishevelled homolog DVL-2 OS=Homo sapiens OX=9606 GN=DVL2 PE=1 SV=1	0	FALSE	6.44	2	2	5	2	736	78.9	6.02	10.35	2	0	1.3087e+07	1.31073e+07	1.26362e+07
High	IsMasterProtein	Q01518	Adenylyl cyclase-associated protein 1 OS=Homo sapiens OX=9606 GN=CAP1 PE=1 SV=5	0	FALSE	6.435	7	2	3	2	475	51.9	8.06	7.12	2	0	3.46966e+06	3.15727e+06	3.13929e+06
High	IsMasterProtein	Q08J23	RNA cytosine C(5)-methyltransferase NSUN2 OS=Homo sapiens OX=9606 GN=NSUN2 PE=1 SV=2	0	FALSE	6.372	5	2	3	2	767	86.4	6.77	7.82	2	0	3.1083e+06	3.57945e+06	3.88575e+06
High	IsMasterProtein	Q13428	Treacle protein OS=Homo sapiens OX=9606 GN=TCOF1 PE=1 SV=3	0	FALSE	6.305	2	3	7	3	1488	152	9.04	8.3	3	0	2.41472e+07	2.34604e+07	23964691
High	IsMasterProtein	P49841	Glycogen synthase kinase-3 beta OS=Homo sapiens OX=9606 GN=GSK3B PE=1 SV=2	0	FALSE	6.176	5	2	4	2	420	46.7	8.78	6.96	2	0	6.537e+06	6.79981e+06	3.92668e+06
High	IsMasterProtein	P48735	Isocitrate dehydrogenase [NADP], mitochondrial OS=Homo sapiens OX=9606 GN=IDH2 PE=1 SV=2	0	FALSE	6.104	4	2	4	2	452	50.9	8.69	6.16	2	0	2.50488e+06	4.83377e+06	5.00081e+06
High	IsMasterProtein	O00487	26S proteasome non-ATPase regulatory subunit 14 OS=Homo sapiens OX=9606 GN=PSMD14 PE=1 SV=1	0	FALSE	6.098	6	2	4	2	310	34.6	6.52	10.55	2	0	1.16035e+07	1.17257e+07	11282010
High	IsMasterProtein	O95721	Synaptosomal-associated protein 29 OS=Homo sapiens OX=9606 GN=SNAP29 PE=1 SV=1	0	FALSE	6.021	8	2	4	2	258	29	5.81	7.42	2	0	1.15995e+07	1.14931e+07	11977514
High	IsMasterProtein	P20674	Cytochrome c oxidase subunit 5A, mitochondrial OS=Homo sapiens OX=9606 GN=COX5A PE=1 SV=2	0	FALSE	5.975	16	2	5	2	150	16.8	6.79	16.18	2	0	1.43666e+07	1.50214e+07	1.47571e+07
High	IsMasterProtein	O75477	Erlin-1 OS=Homo sapiens OX=9606 GN=ERLIN1 PE=1 SV=2	0	FALSE	5.959	6	2	6	1	348	39.1	7.87	13.33	2	0	4.07083e+06	1.38644e+06	3873010
High	IsMasterProtein	P17612	cAMP-dependent protein kinase catalytic subunit alpha OS=Homo sapiens OX=9606 GN=PRKACA PE=1 SV=2	0	FALSE	5.939	8	2	3	2	351	40.6	8.79	3.96	2	0	6.31602e+06	6.71297e+06	7.01639e+06
High	IsMasterProtein	O75390	Citrate synthase, mitochondrial OS=Homo sapiens OX=9606 GN=CS PE=1 SV=2	0	FALSE	5.938	4	2	5	2	466	51.7	8.32	10.13	2	0	8.55236e+06	8.26657e+06	7.96734e+06
High	IsMasterProtein	Q9BVP2	Guanine nucleotide-binding protein-like 3 OS=Homo sapiens OX=9606 GN=GNL3 PE=1 SV=2	0	FALSE	5.835	3	2	5	2	549	62	9.16	11.39	2	0	4.69197e+06	4.68351e+06	4.93155e+06
High	IsMasterProtein	O15260	Surfeit locus protein 4 OS=Homo sapiens OX=9606 GN=SURF4 PE=1 SV=3	0	FALSE	5.829	8	2	2	2	269	30.4	7.78	4.74	2	0	6.46176e+06	6.05319e+06	6.72413e+06
High	IsMasterProtein	P49736	DNA replication licensing factor MCM2 OS=Homo sapiens OX=9606 GN=MCM2 PE=1 SV=4	0	FALSE	5.795	2	2	5	2	904	101.8	5.52	6.39	2	0	3.47029e+06	3.05447e+06	3.16288e+06
High	IsMasterProtein	Q15029	116 kDa U5 small nuclear ribonucleoprotein component OS=Homo sapiens OX=9606 GN=EFTUD2 PE=1 SV=1	0	FALSE	5.785	3	2	5	1	972	109.4	5	12.95	2	0	4.63688e+06		3.83696e+06
High	IsMasterProtein	Q02809	Procollagen-lysine,2-oxoglutarate 5-dioxygenase 1 OS=Homo sapiens OX=9606 GN=PLOD1 PE=1 SV=2	0	FALSE	5.761	4	2	3	2	727	83.5	6.95	9.01	2	0	3.52063e+06	2.7319e+06	2.96164e+06
High	IsMasterProtein	P54709	Sodium/potassium-transporting ATPase subunit beta-3 OS=Homo sapiens OX=9606 GN=ATP1B3 PE=1 SV=1	0	FALSE	5.76	8	2	4	2	279	31.5	8.35	9.18	2	0	1.45839e+07	1.39154e+07	1.37248e+07
High	IsMasterProtein	Q9UHG3	Prenylcysteine oxidase 1 OS=Homo sapiens OX=9606 GN=PCYOX1 PE=1 SV=3	0	FALSE	5.754	4	2	6	2	505	56.6	6.18	8.81	2	0	1.15685e+07	1.29438e+07	1.22161e+07
High	IsMasterProtein	Q9NYF8	Bcl-2-associated transcription factor 1 OS=Homo sapiens OX=9606 GN=BCLAF1 PE=1 SV=2	0	FALSE	5.74	4	3	6	3	920	106.1	9.98	8.04	3	0	1.03136e+07	1.36627e+07	1.25927e+07
High	IsMasterProtein	Q14696	LRP chaperone MESD OS=Homo sapiens OX=9606 GN=MESD PE=1 SV=2	0	FALSE	5.724	7	2	4	2	234	26.1	7.78	8.04	2	0	1.47709e+07	1.14307e+07	1.34897e+07
High	IsMasterProtein	Q5JSZ5	Protein PRRC2B OS=Homo sapiens OX=9606 GN=PRRC2B PE=1 SV=2	0	FALSE	5.682	1	2	3	2	2229	242.8	8.34	8.76	2	0
High	IsMasterProtein	Q13098	COP9 signalosome complex subunit 1 OS=Homo sapiens OX=9606 GN=GPS1 PE=1 SV=4	0	FALSE	5.677	4	2	2	2	491	55.5	6.74	4.52	2	0	6.56543e+06	3.89715e+06	6.54521e+06
High	IsMasterProtein	Q9Y282	Endoplasmic reticulum-Golgi intermediate compartment protein 3 OS=Homo sapiens OX=9606 GN=ERGIC3 PE=1 SV=1	0	FALSE	5.668	6	2	5	2	383	43.2	6.06	10.7	2	0	1.45479e+07	1.31437e+07	1.40439e+07
High	IsMasterProtein	Q9BUK6	Protein misato homolog 1 OS=Homo sapiens OX=9606 GN=MSTO1 PE=1 SV=1	0	FALSE	5.593	3	2	3	2	570	61.8	6.11	4.39	2	0	7.08393e+06	7.94469e+06	8.09897e+06
High	IsMasterProtein	Q92769	Histone deacetylase 2 OS=Homo sapiens OX=9606 GN=HDAC2 PE=1 SV=2	0	FALSE	5.557	4	2	3	1	488	55.3	5.91	6	2	1	7.26068e+06	8.29446e+06	7636170
High	IsMasterProtein	A6NHR9	Structural maintenance of chromosomes flexible hinge domain-containing protein 1 OS=Homo sapiens OX=9606 GN=SMCHD1 PE=1 SV=2	0	FALSE	5.497	1	2	4	2	2005	226.2	7.3	1.94	2	0	2.04453e+07	6.78693e+07	6.88186e+07
High	IsMasterProtein	Q96QC0	Serine/threonine-protein phosphatase 1 regulatory subunit 10 OS=Homo sapiens OX=9606 GN=PPP1R10 PE=1 SV=1	0	FALSE	5.453	2	2	4	2	940	99	9.17	4.97	2	0	2.42978e+06	2.00906e+06	2.06856e+06
High	IsMasterProtein	P13797	Plastin-3 OS=Homo sapiens OX=9606 GN=PLS3 PE=1 SV=4	0	FALSE	5.41	6	2	2	2	630	70.8	5.6	2.53	2	0	4.58446e+06	4.45333e+06	4.65404e+06
High	IsMasterProtein	P08237	ATP-dependent 6-phosphofructokinase, muscle type OS=Homo sapiens OX=9606 GN=PFKM PE=1 SV=2	0	FALSE	5.334	4	2	2	2	780	85.1	7.99	6.16	2	0	2.85966e+06	2.72468e+06	5184726
High	IsMasterProtein	Q6PI48	Aspartate--tRNA ligase, mitochondrial OS=Homo sapiens OX=9606 GN=DARS2 PE=1 SV=1	0	FALSE	5.324	3	2	4	2	645	73.5	8.02	7.73	2	0	5.51982e+06	5.3707e+06	5.56013e+06
High	IsMasterProtein	Q92896	Golgi apparatus protein 1 OS=Homo sapiens OX=9606 GN=GLG1 PE=1 SV=2	0	FALSE	5.305	2	2	3	2	1179	134.5	6.9	6.13	2	0	4.62382e+06	4.4827e+06	4.83066e+06
High	IsMasterProtein	P55010	Eukaryotic translation initiation factor 5 OS=Homo sapiens OX=9606 GN=EIF5 PE=1 SV=2	0	FALSE	5.206	4	2	6	2	431	49.2	5.58	12.58	2	0	9.09098e+06	9.38843e+06	9146480
High	IsMasterProtein	Q9BQA1	Methylosome protein 50 OS=Homo sapiens OX=9606 GN=WDR77 PE=1 SV=1	0	FALSE	5.185	5	2	5	2	342	36.7	5.17	9.9	2	0	7.28413e+06	7.29075e+06	7191651
High	IsMasterProtein	P61289	Proteasome activator complex subunit 3 OS=Homo sapiens OX=9606 GN=PSME3 PE=1 SV=1	0	FALSE	5.159	9	2	2	2	254	29.5	5.95	3.83	2	0	2.88977e+06	3.19967e+06	2.9171e+06
High	IsMasterProtein	Q05682	Caldesmon OS=Homo sapiens OX=9606 GN=CALD1 PE=1 SV=3	0	FALSE	5.136	4	2	4	2	793	93.2	5.66	11.81	2	0	7.60213e+06	6.68061e+06	6.76207e+06
High	IsMasterProtein	P14324	Farnesyl pyrophosphate synthase OS=Homo sapiens OX=9606 GN=FDPS PE=1 SV=4	0	FALSE	5.056	5	2	4	2	419	48.2	6.15	9.01	2	0	9.1363e+06	9.21466e+06	8563456
High	IsMasterProtein	Q9Y6E2	Basic leucine zipper and W2 domain-containing protein 2 OS=Homo sapiens OX=9606 GN=BZW2 PE=1 SV=1	0	FALSE	4.94	5	3	7	3	419	48.1	6.68	10.33	3	0	1.1348e+07	1.28015e+07	1.23632e+07
High	IsMasterProtein	Q9NPQ8	Synembryn-A OS=Homo sapiens OX=9606 GN=RIC8A PE=1 SV=3	0	FALSE	4.911	3	2	3	2	531	59.7	5.33	5.13	2	0	3.69193e+06	3.72907e+06	3.4403e+06
High	IsMasterProtein	P55265	Double-stranded RNA-specific adenosine deaminase OS=Homo sapiens OX=9606 GN=ADAR PE=1 SV=4	0	FALSE	4.886	2	2	6	2	1226	136	8.65	10.92	2	0	7.85915e+06	8.29391e+06	8.04333e+06
High	IsMasterProtein	Q70UQ0	Inhibitor of nuclear factor kappa-B kinase-interacting protein OS=Homo sapiens OX=9606 GN=IKBIP PE=1 SV=1	0	FALSE	4.881	10	2	3	1	350	39.3	9.17	5.82	2	0	298740	408893	660568
High	IsMasterProtein	P40616	ADP-ribosylation factor-like protein 1 OS=Homo sapiens OX=9606 GN=ARL1 PE=1 SV=1	0	FALSE	4.757	14	2	5	2	181	20.4	5.72	13.3	2	0	8.61104e+06	7.91037e+06	5.12008e+06
High	IsMasterProtein	P11802	Cyclin-dependent kinase 4 OS=Homo sapiens OX=9606 GN=CDK4 PE=1 SV=2	0	FALSE	4.746	7	2	3	1	303	33.7	7.01	7.56	2	0	1.99219e+07	2.25255e+07	21400710
High	IsMasterProtein	P63173	60S ribosomal protein L38 OS=Homo sapiens OX=9606 GN=RPL38 PE=1 SV=2	0	FALSE	4.731	24	2	6	2	70	8.2	10.1	6.29	2	0	5.71397e+07	5.45319e+07	54007812
High	IsMasterProtein	P61353	60S ribosomal protein L27 OS=Homo sapiens OX=9606 GN=RPL27 PE=1 SV=2	0	FALSE	4.492	13	2	6	2	136	15.8	10.56	14.48	2	0	1.82065e+07	1.76012e+07	16637083
High	IsMasterProtein	P61009	Signal peptidase complex subunit 3 OS=Homo sapiens OX=9606 GN=SPCS3 PE=1 SV=1	0	FALSE	4.476	11	2	2	2	180	20.3	8.62	4.39	2	0	9.92035e+06	1.01151e+06	9534658
High	IsMasterProtein	P15927	Replication protein A 32 kDa subunit OS=Homo sapiens OX=9606 GN=RPA2 PE=1 SV=1	0	FALSE	4.476	7	2	5	2	270	29.2	6.15	9.55	2	0	7.49507e+06	8.50804e+06	7.96862e+06
High	IsMasterProtein	Q8WUY1	Protein THEM6 OS=Homo sapiens OX=9606 GN=THEM6 PE=1 SV=2	0	FALSE	4.306	8	2	2	2	208	23.9	9.55	2	2	0	6.2374e+06	6.63165e+06	6.71609e+06
High	IsMasterProtein	P62330	ADP-ribosylation factor 6 OS=Homo sapiens OX=9606 GN=ARF6 PE=1 SV=2	0	FALSE	3.832	9	2	3	1	175	20.1	8.95	6.7	2	0	3.40106e+06	2.8447e+06	2.70052e+06
High	IsMasterProtein	O75436	Vacuolar protein sorting-associated protein 26A OS=Homo sapiens OX=9606 GN=VPS26A PE=1 SV=2	0	FALSE	3.801	5	2	4	2	327	38.1	6.57	8.25	2	0	5.31748e+06	3.53332e+06	2.83285e+06
High	IsMasterProtein	P36871	Phosphoglucomutase-1 OS=Homo sapiens OX=9606 GN=PGM1 PE=1 SV=3	0	FALSE	3.592	3	2	3	2	562	61.4	6.76	3.64	2	0	4.82665e+06	4.6031e+06	4.76422e+06
High	IsMasterProtein	Q8N0X7	Spartin OS=Homo sapiens OX=9606 GN=SPART PE=1 SV=1	0	FALSE	3.529	5	2	4	2	666	72.8	5.91	3.54	2	0	2.49371e+07	3.23394e+07	30410312
High	IsMasterProtein	P11171	Protein 4.1 OS=Homo sapiens OX=9606 GN=EPB41 PE=1 SV=4	0	FALSE	3.432	2	2	2	2	864	97	5.58	2.51	2	0	8.56947e+06	7.20495e+06	9.67488e+06
High	IsMasterProtein	P48556	26S proteasome non-ATPase regulatory subunit 8 OS=Homo sapiens OX=9606 GN=PSMD8 PE=1 SV=2	0	FALSE	3.277	5	2	5	2	350	39.6	9.7	8.03	2	0	9.09728e+06	9.63253e+06	9132575
High	IsMasterProtein	P61970	Nuclear transport factor 2 OS=Homo sapiens OX=9606 GN=NUTF2 PE=1 SV=1	0	FALSE	3.108	12	2	3	2	127	14.5	5.38	3.53	2	0	3.12006e+07	3.03797e+07	30535191
High	IsMasterProtein	P62273	40S ribosomal protein S29 OS=Homo sapiens OX=9606 GN=RPS29 PE=1 SV=2	0	FALSE	2.625	27	2	6	2	56	6.7	10.13	5.15	2	0	2.11358e+07	2.12273e+07	1.9709e+07
High	IsMasterProtein	P84243	Histone H3.3 OS=Homo sapiens OX=9606 GN=H3-3A PE=1 SV=2	0	FALSE	2.586	12	2	2	2	136	15.3	11.27	3.66	2	0	5.01673e+06	2.33228e+07	5.42192e+06
High	IsMasterProtein	Q9BY44	Eukaryotic translation initiation factor 2A OS=Homo sapiens OX=9606 GN=EIF2A PE=1 SV=3	0	FALSE	2.124	4	2	4	2	585	64.9	8.87	4.49	2	0	4.13302e+06	4.5757e+06	4.7636e+06

## Sheet: s4_Olfr544-AirID_RTP1S
Protein FDR Confidence Combined	Master	Accession	Description	Exp q-value Combined	Contaminant	Sum PEP Score	Coverage in Percent	Number of Peptides	Number of PSMs	Number of Unique Peptides	Number of AAs	MW in kDa	calc pI	Score Sequest HT	Number of Peptides by Sequest HT	Number of Razor Peptides	Abundances Normalized Meas. 1	Abundances Normalized Meas. 2	Abundances Normalized Meas. 3
High	IsMasterProtein	P49327	Fatty acid synthase OS=Homo sapiens OX=9606 GN=FASN PE=1 SV=3	0	FALSE	631.542	49	88	322	88	2511	273.3	6.44	1149.8	88	0	1.75133e+09	1.73397e+09	1.66949e+09
High	IsMasterProtein	P11498	Pyruvate carboxylase, mitochondrial OS=Homo sapiens OX=9606 GN=PC PE=1 SV=2	0	FALSE	304.73	52	45	187	45	1178	129.6	6.84	604.6	45	0	9.62687e+08	9.13922e+08	9.1792e+08
High	IsMasterProtein	P0DMV9	Heat shock 70 kDa protein 1B OS=Homo sapiens OX=9606 GN=HSPA1B PE=1 SV=1	0	FALSE	263.252	65	32	186	22	641	70	5.66	616.52	32	10	1.9582e+09	1.93543e+09	1.91915e+09
High	IsMasterProtein	Q00610	Clathrin heavy chain 1 OS=Homo sapiens OX=9606 GN=CLTC PE=1 SV=5	0	FALSE	228.158	30	40	101	40	1675	191.5	5.69	324.56	40	0	2.39583e+08	2.34678e+08	2.1267e+08
High	IsMasterProtein	P42167	Lamina-associated polypeptide 2, isoforms beta/gamma OS=Homo sapiens OX=9606 GN=TMPO PE=1 SV=2	0	FALSE	212.03	55	20	133	20	454	50.6	9.38	476.5	20	0	1.44636e+09	1.38967e+09	1.41098e+09
High	IsMasterProtein	P68363	Tubulin alpha-1B chain OS=Homo sapiens OX=9606 GN=TUBA1B PE=1 SV=1	0	FALSE	183.818	61	20	141	3	451	50.1	5.06	501.41	20	18	1.25364e+09	1.29511e+09	1.21838e+09
High	IsMasterProtein	P78527	DNA-dependent protein kinase catalytic subunit OS=Homo sapiens OX=9606 GN=PRKDC PE=1 SV=3	0	FALSE	181.741	14	45	104	45	4128	468.8	7.12	279.64	45	0	1.70867e+08	1.63249e+08	1.59252e+08
High	IsMasterProtein	Q71U36	Tubulin alpha-1A chain OS=Homo sapiens OX=9606 GN=TUBA1A PE=1 SV=1	0	FALSE	176.421	61	20	118	3	451	50.1	5.06	429.58	20	0	3.23016e+07	3.15507e+07	3.35852e+07
High	IsMasterProtein	P08238	Heat shock protein HSP 90-beta OS=Homo sapiens OX=9606 GN=HSP90AB1 PE=1 SV=4	0	FALSE	170.867	44	30	156	21	724	83.2	5.03	436.67	30	11	1.50526e+09	1.44211e+09	1.35392e+09
High	IsMasterProtein	P05165	Propionyl-CoA carboxylase alpha chain, mitochondrial OS=Homo sapiens OX=9606 GN=PCCA PE=1 SV=4	0	FALSE	167.984	46	29	103	29	728	80	7.52	297.46	29	0	5.34225e+08	5.08884e+08	500760525
High	IsMasterProtein	P13639	Elongation factor 2 OS=Homo sapiens OX=9606 GN=EEF2 PE=1 SV=4	0	FALSE	167.135	40	32	115	31	858	95.3	6.83	325.2	32	1	5.49606e+08	5.15003e+08	489251138
High	IsMasterProtein	P07900	Heat shock protein HSP 90-alpha OS=Homo sapiens OX=9606 GN=HSP90AA1 PE=1 SV=5	0	FALSE	165.876	42	28	136	20	732	84.6	5.02	402.23	28	0	4.34167e+08	4.67582e+08	396037420
High	IsMasterProtein	P07437	Tubulin beta chain OS=Homo sapiens OX=9606 GN=TUBB PE=1 SV=2	0	FALSE	152.143	60	19	137	4	444	49.6	4.89	431.63	19	19	6.33052e+08	6.23141e+08	6.18794e+08
High	IsMasterProtein	P09874	Poly [ADP-ribose] polymerase 1 OS=Homo sapiens OX=9606 GN=PARP1 PE=1 SV=4	0	FALSE	140.315	26	20	66	20	1014	113	8.88	220.47	20	0	2.29376e+08	2.27249e+08	2.14775e+08
High	IsMasterProtein	P50990	T-complex protein 1 subunit theta OS=Homo sapiens OX=9606 GN=CCT8 PE=1 SV=4	0	FALSE	139.463	51	26	87	26	548	59.6	5.6	267.98	26	0	5.56478e+08	5.94483e+08	5.47565e+08
High	IsMasterProtein	P07814	Bifunctional glutamate/proline--tRNA ligase OS=Homo sapiens OX=9606 GN=EPRS PE=1 SV=5	0	FALSE	139.012	26	27	70	27	1512	170.5	7.33	212.43	27	0	1.41524e+08	1.33833e+08	1.33236e+08
High	IsMasterProtein	P11142	Heat shock cognate 71 kDa protein OS=Homo sapiens OX=9606 GN=HSPA8 PE=1 SV=1	0	FALSE	137.208	43	22	96	17	646	70.9	5.52	293.59	22	1	3.89477e+08	5.21301e+08	3.61198e+08
High	IsMasterProtein	P68371	Tubulin beta-4B chain OS=Homo sapiens OX=9606 GN=TUBB4B PE=1 SV=1	0	FALSE	127.582	56	18	110	1	445	49.8	4.89	335.09	18	3	2.36783e+08	2.60615e+08	2.29179e+08
High	IsMasterProtein	P14618	Pyruvate kinase PKM OS=Homo sapiens OX=9606 GN=PKM PE=1 SV=4	0	FALSE	121.55	51	19	57	19	531	57.9	7.84	201.64	19	0	2.06525e+08	2.10664e+08	194491925
High	IsMasterProtein	Q14697	Neutral alpha-glucosidase AB OS=Homo sapiens OX=9606 GN=GANAB PE=1 SV=3	0	FALSE	119.976	32	22	65	22	944	106.8	6.14	198.77	22	0	2.16356e+08	2.13467e+08	1.99322e+08
High	IsMasterProtein	Q7Z2W4	Zinc finger CCCH-type antiviral protein 1 OS=Homo sapiens OX=9606 GN=ZC3HAV1 PE=1 SV=3	0	FALSE	118.263	38	25	60	25	902	101.4	8.4	197.38	25	0	1.41383e+08	1.40419e+08	1.34216e+08
High	IsMasterProtein	P63244	Receptor of activated protein C kinase 1 OS=Homo sapiens OX=9606 GN=RACK1 PE=1 SV=3	0	FALSE	117.655	65	15	65	15	317	35.1	7.69	200.66	15	0	4.20671e+08	3.92808e+08	4.21419e+08
High	IsMasterProtein	P04350	Tubulin beta-4A chain OS=Homo sapiens OX=9606 GN=TUBB4A PE=1 SV=2	0	FALSE	116.099	48	15	97	1	444	49.6	4.88	292.92	15	0	2.551e+06	2.5804e+06	2.35514e+06
High	IsMasterProtein	P07195	L-lactate dehydrogenase B chain OS=Homo sapiens OX=9606 GN=LDHB PE=1 SV=2	0	FALSE	115.521	49	16	100	15	334	36.6	6.05	277.28	16	0	7.39538e+08	6.86067e+08	6.53047e+08
High	IsMasterProtein	Q96RQ3	Methylcrotonoyl-CoA carboxylase subunit alpha, mitochondrial OS=Homo sapiens OX=9606 GN=MCCC1 PE=1 SV=3	0	FALSE	111.97	29	17	70	17	725	80.4	7.78	224.1	17	0	3.58932e+08	3.38195e+08	3.31929e+08
High	IsMasterProtein	Q08211	ATP-dependent RNA helicase A OS=Homo sapiens OX=9606 GN=DHX9 PE=1 SV=4	0	FALSE	111.466	22	22	61	22	1270	140.9	6.84	176.67	22	0	1.41803e+08	1.39209e+08	1.33567e+08
High	IsMasterProtein	P68104	Elongation factor 1-alpha 1 OS=Homo sapiens OX=9606 GN=EEF1A1 PE=1 SV=1	0	FALSE	111.21	37	12	66	12	462	50.1	9.01	247.23	12	0	7.57358e+08	7.17299e+08	6.95492e+08
High	IsMasterProtein	P61978	Heterogeneous nuclear ribonucleoprotein K OS=Homo sapiens OX=9606 GN=HNRNPK PE=1 SV=1	0	FALSE	110.87	38	15	79	15	463	50.9	5.54	251.17	15	0	4.5937e+08	4.28323e+08	4.01559e+08
High	IsMasterProtein	Q04637	Eukaryotic translation initiation factor 4 gamma 1 OS=Homo sapiens OX=9606 GN=EIF4G1 PE=1 SV=4	0	FALSE	107.914	17	22	70	21	1599	175.4	5.33	190.76	22	1	2.52646e+08	2.27891e+08	2.43522e+08
High	IsMasterProtein	Q13885	Tubulin beta-2A chain OS=Homo sapiens OX=9606 GN=TUBB2A PE=1 SV=1	0	FALSE	101.248	41	14	96	1	445	49.9	4.89	298.04	14	0	5.77632e+06	7.80602e+06	6146909
High	IsMasterProtein	Q92616	eIF-2-alpha kinase activator GCN1 OS=Homo sapiens OX=9606 GN=GCN1 PE=1 SV=6	0	FALSE	100.76	11	20	42	20	2671	292.6	7.47	101.78	20	0	4.99465e+07	4.67215e+07	4.55244e+07
High	IsMasterProtein	P42704	Leucine-rich PPR motif-containing protein, mitochondrial OS=Homo sapiens OX=9606 GN=LRPPRC PE=1 SV=3	0	FALSE	98.323	18	18	36	18	1394	157.8	6.13	103.1	18	0	5.77177e+07	5.68352e+07	5.02569e+07
High	IsMasterProtein	Q96A33	Coiled-coil domain-containing protein 47 OS=Homo sapiens OX=9606 GN=CCDC47 PE=1 SV=1	0	FALSE	95.638	24	11	70	11	483	55.8	4.87	239.52	11	0	5.03779e+08	4.93582e+08	4.73322e+08
High	IsMasterProtein	P00338	L-lactate dehydrogenase A chain OS=Homo sapiens OX=9606 GN=LDHA PE=1 SV=2	0	FALSE	95.47	68	18	75	17	332	36.7	8.27	206.39	18	1	7.40398e+08	6.87914e+08	7.01166e+08
High	IsMasterProtein	O00571	ATP-dependent RNA helicase DDX3X OS=Homo sapiens OX=9606 GN=DDX3X PE=1 SV=3	0	FALSE	95.259	30	17	50	17	662	73.2	7.18	172.25	17	0	2.16371e+08	2.10536e+08	1.97043e+08
High	IsMasterProtein	Q14974	Importin subunit beta-1 OS=Homo sapiens OX=9606 GN=KPNB1 PE=1 SV=2	0	FALSE	94.327	22	14	42	14	876	97.1	4.78	128.78	14	0	8.22921e+07	7.40048e+07	6.66824e+07
High	IsMasterProtein	O75533	Splicing factor 3B subunit 1 OS=Homo sapiens OX=9606 GN=SF3B1 PE=1 SV=3	0	FALSE	94.129	15	14	40	14	1304	145.7	7.09	134.33	14	0	6.0658e+07	6.31249e+07	5.76273e+07
High	IsMasterProtein	P22234	Multifunctional protein ADE2 OS=Homo sapiens OX=9606 GN=PAICS PE=1 SV=3	0	FALSE	91.099	44	18	54	18	425	47	7.23	150.45	18	0	2.34822e+08	2.30827e+08	2.1389e+08
High	IsMasterProtein	Q00839	Heterogeneous nuclear ribonucleoprotein U OS=Homo sapiens OX=9606 GN=HNRNPU PE=1 SV=6	0	FALSE	88.924	21	14	52	14	825	90.5	6	178.81	14	0	2.31091e+08	2.28136e+08	2.21109e+08
High	IsMasterProtein	P84103	Serine/arginine-rich splicing factor 3 OS=Homo sapiens OX=9606 GN=SRSF3 PE=1 SV=1	0	FALSE	88.317	48	10	81	9	164	19.3	11.65	225.57	10	1	5.14125e+08	4.6423e+08	463984695
High	IsMasterProtein	P08195	4F2 cell-surface antigen heavy chain OS=Homo sapiens OX=9606 GN=SLC3A2 PE=1 SV=3	0	FALSE	86.068	31	12	28	12	630	68	5.01	115.9	12	0	7.78479e+07	8.59105e+07	7.79952e+07
High	IsMasterProtein	P34931	Heat shock 70 kDa protein 1-like OS=Homo sapiens OX=9606 GN=HSPA1L PE=1 SV=2	0	FALSE	85.437	26	12	62	1	641	70.3	6.02	198.39	12	0	5.62431e+06	6.38017e+06	5.89011e+06
High	IsMasterProtein	P59025	Receptor-transporting protein 1 OS=Homo sapiens OX=9606 GN=RTP1 PE=2 SV=2	0	FALSE	83.851	29	6	118	6	263	30.9	7.81	416.97	6	0	4.13262e+09	3.86841e+09	4078251600
High	IsMasterProtein	P22102	Trifunctional purine biosynthetic protein adenosine-3 OS=Homo sapiens OX=9606 GN=GART PE=1 SV=1	0	FALSE	82.213	22	18	47	18	1010	107.7	6.7	145.11	18	0	1.72295e+08	1.61917e+08	1.20926e+08
High	IsMasterProtein	P13010	X-ray repair cross-complementing protein 5 OS=Homo sapiens OX=9606 GN=XRCC5 PE=1 SV=3	0	FALSE	81.829	28	17	49	17	732	82.7	5.81	148.09	17	0	1.50009e+08	1.48647e+08	1.48122e+08
High	IsMasterProtein	O14654	Insulin receptor substrate 4 OS=Homo sapiens OX=9606 GN=IRS4 PE=1 SV=1	0	FALSE	80.161	15	12	32	12	1257	133.7	8.44	105.57	12	0	5.71529e+07	5.79399e+07	5.9267e+07
High	IsMasterProtein	P63104	14-3-3 protein zeta/delta OS=Homo sapiens OX=9606 GN=YWHAZ PE=1 SV=1	0	FALSE	78.513	48	11	56	8	245	27.7	4.79	155.11	11	2	1.50479e+08	1.65668e+08	1.74715e+08
High	IsMasterProtein	P04843	Dolichyl-diphosphooligosaccharide--protein glycosyltransferase subunit 1 OS=Homo sapiens OX=9606 GN=RPN1 PE=1 SV=1	0	FALSE	78.457	36	15	36	15	607	68.5	6.38	117.11	15	0	1.00105e+08	9.76104e+07	9.48856e+07
High	IsMasterProtein	Q9Y383	Putative RNA-binding protein Luc7-like 2 OS=Homo sapiens OX=9606 GN=LUC7L2 PE=1 SV=2	0	FALSE	77.464	35	13	41	8	392	46.5	10.01	133.04	13	5	2.22148e+08	1.93017e+08	1.89563e+08
High	IsMasterProtein	Q9UGP8	Translocation protein SEC63 homolog OS=Homo sapiens OX=9606 GN=SEC63 PE=1 SV=2	0	FALSE	76.929	23	13	40	13	760	87.9	5.31	126.38	13	0	1.08803e+08	1.12449e+08	1.09523e+08
High	IsMasterProtein	P60842	Eukaryotic initiation factor 4A-I OS=Homo sapiens OX=9606 GN=EIF4A1 PE=1 SV=1	0	FALSE	76.522	39	15	61	13	406	46.1	5.48	157.63	15	2	3.35572e+08	3.30576e+08	3.18579e+08
High	IsMasterProtein	P17987	T-complex protein 1 subunit alpha OS=Homo sapiens OX=9606 GN=TCP1 PE=1 SV=1	0	FALSE	75.943	29	12	42	12	556	60.3	6.11	130.68	12	0	1.36303e+08	1.28594e+08	1.17653e+08
High	IsMasterProtein	P37802	Transgelin-2 OS=Homo sapiens OX=9606 GN=TAGLN2 PE=1 SV=3	0	FALSE	74.434	61	12	48	12	199	22.4	8.25	143.63	12	0	1.15082e+08	1.18236e+08	1.11983e+08
High	IsMasterProtein	P46108	Adapter molecule crk OS=Homo sapiens OX=9606 GN=CRK PE=1 SV=2	0	FALSE	74.358	53	12	38	3	304	33.8	5.55	136.15	12	10	1.53082e+08	1.62047e+08	153719282
High	IsMasterProtein	Q9BSJ8	Extended synaptotagmin-1 OS=Homo sapiens OX=9606 GN=ESYT1 PE=1 SV=1	0	FALSE	72.687	18	13	30	13	1104	122.8	5.83	93.25	13	0	6.75289e+07	6.70546e+07	6.14849e+07
High	IsMasterProtein	P21333	Filamin-A OS=Homo sapiens OX=9606 GN=FLNA PE=1 SV=4	0	FALSE	71.21	8	17	40	17	2647	280.6	6.06	112.23	17	0	9.21846e+07	9.31528e+07	8.86274e+07
High	IsMasterProtein	P12956	X-ray repair cross-complementing protein 6 OS=Homo sapiens OX=9606 GN=XRCC6 PE=1 SV=2	0	FALSE	70.868	27	12	36	12	609	69.8	6.64	104.1	12	0	9.03643e+07	8.66579e+07	8.47183e+07
High	IsMasterProtein	P06737	Glycogen phosphorylase, liver form OS=Homo sapiens OX=9606 GN=PYGL PE=1 SV=4	0	FALSE	70.629	21	17	45	17	847	97.1	7.17	119.68	17	0	8.70721e+07	9.05802e+07	8.54117e+07
High	IsMasterProtein	P26641	Elongation factor 1-gamma OS=Homo sapiens OX=9606 GN=EEF1G PE=1 SV=3	0	FALSE	70.53	35	14	32	14	437	50.1	6.67	97.93	14	0	1.36757e+08	1.22167e+08	1.16022e+08
High	IsMasterProtein	P09651	Heterogeneous nuclear ribonucleoprotein A1 OS=Homo sapiens OX=9606 GN=HNRNPA1 PE=1 SV=5	0	FALSE	70.48	32	10	37	10	372	38.7	9.13	122.42	10	0	1.15793e+08	1.1746e+08	1.13007e+08
High	IsMasterProtein	P62258	14-3-3 protein epsilon OS=Homo sapiens OX=9606 GN=YWHAE PE=1 SV=1	0	FALSE	70.344	45	11	56	9	255	29.2	4.74	159.22	11	3	5.32643e+08	5.33623e+08	5.07629e+08
High	IsMasterProtein	P08670	Vimentin OS=Homo sapiens OX=9606 GN=VIM PE=1 SV=4	0	FALSE	70.341	33	12	43	12	466	53.6	5.12	123.08	12	0	2.19622e+08	1.97796e+08	209010839
High	IsMasterProtein	Q99460	26S proteasome non-ATPase regulatory subunit 1 OS=Homo sapiens OX=9606 GN=PSMD1 PE=1 SV=2	0	FALSE	69.799	23	13	36	13	953	105.8	5.39	115.33	13	0	1.23067e+08	1.21492e+08	1.08708e+08
High	IsMasterProtein	Q14498	RNA-binding protein 39 OS=Homo sapiens OX=9606 GN=RBM39 PE=1 SV=2	0	FALSE	69.397	30	12	36	12	530	59.3	10.1	110.07	12	0	1.51845e+08	1.41825e+08	1.4407e+08
High	IsMasterProtein	P23396	40S ribosomal protein S3 OS=Homo sapiens OX=9606 GN=RPS3 PE=1 SV=2	0	FALSE	68.946	68	17	59	17	243	26.7	9.66	169.29	17	0	3.07525e+08	2.94998e+08	2.94045e+08
High	IsMasterProtein	Q15233	Non-POU domain-containing octamer-binding protein OS=Homo sapiens OX=9606 GN=NONO PE=1 SV=4	0	FALSE	68.561	30	12	51	11	471	54.2	8.95	143.29	12	1	5.08789e+08	4.42691e+08	5.03583e+08
High	IsMasterProtein	P68133	Actin, alpha skeletal muscle OS=Homo sapiens OX=9606 GN=ACTA1 PE=1 SV=1	0	FALSE	66.865	32	12	90	2	377	42	5.39	222.1	12	0	6.61728e+06	7.24411e+06	6.59628e+06
High	IsMasterProtein	Q86TX2	Acyl-coenzyme A thioesterase 1 OS=Homo sapiens OX=9606 GN=ACOT1 PE=1 SV=1	0	FALSE	66.097	42	14	40	1	421	46.2	7.34	117.12	14	0		1.05016e+06	905500
High	IsMasterProtein	P27824	Calnexin OS=Homo sapiens OX=9606 GN=CANX PE=1 SV=2	0	FALSE	65.838	24	11	44	11	592	67.5	4.6	140.56	11	0	1.74623e+08	1.77802e+08	169123979
High	IsMasterProtein	P53618	Coatomer subunit beta OS=Homo sapiens OX=9606 GN=COPB1 PE=1 SV=3	0	FALSE	65.8	19	13	34	13	953	107.1	6.05	106.01	13	0	9.67076e+07	9.25744e+07	92305139
High	IsMasterProtein	P46108-2	Isoform Crk-I of Adapter molecule crk OS=Homo sapiens OX=9606 GN=CRK	0	FALSE	65.138	69	10	32	1	204	22.9	5.48	118.64	10	0	9.38308e+06	1.00845e+07	8.34237e+06
High	IsMasterProtein	P49753	Acyl-coenzyme A thioesterase 2, mitochondrial OS=Homo sapiens OX=9606 GN=ACOT2 PE=1 SV=6	0	FALSE	64.401	35	14	42	1	483	53.2	8.47	120.2	14	13	1.93229e+08	1.81845e+08	1.77302e+08
High	IsMasterProtein	P13797	Plastin-3 OS=Homo sapiens OX=9606 GN=PLS3 PE=1 SV=4	0	FALSE	62.725	33	15	30	15	630	70.8	5.6	90.58	15	0	9.90324e+07	8.2805e+07	7.83176e+07
High	IsMasterProtein	Q96D71	RalBP1-associated Eps domain-containing protein 1 OS=Homo sapiens OX=9606 GN=REPS1 PE=1 SV=3	0	FALSE	59.894	22	10	23	10	796	86.6	5.69	82.39	10	0	3.46322e+07	3.31507e+07	2.59693e+07
High	IsMasterProtein	P06493	Cyclin-dependent kinase 1 OS=Homo sapiens OX=9606 GN=CDK1 PE=1 SV=3	0	FALSE	59.607	51	12	33	11	297	34.1	8.4	98.79	12	1	1.2245e+08	1.20645e+08	1.01885e+08
High	IsMasterProtein	P51610	Host cell factor 1 OS=Homo sapiens OX=9606 GN=HCFC1 PE=1 SV=2	0	FALSE	59.389	8	12	32	12	2035	208.6	7.46	98.52	12	0	7.87301e+07	7.81454e+07	7.56232e+07
High	IsMasterProtein	P35579	Myosin-9 OS=Homo sapiens OX=9606 GN=MYH9 PE=1 SV=4	0	FALSE	59.355	8	14	32	10	1960	226.4	5.6	93.54	14	4	7.22766e+07	6.82945e+07	6.68845e+07
High	IsMasterProtein	Q14739	Delta(14)-sterol reductase LBR OS=Homo sapiens OX=9606 GN=LBR PE=1 SV=2	0	FALSE	58.943	23	13	37	13	615	70.7	9.36	101.15	13	0	2.82235e+08	2.76684e+08	2.6862e+08
High	IsMasterProtein	P05388	60S acidic ribosomal protein P0 OS=Homo sapiens OX=9606 GN=RPLP0 PE=1 SV=1	0	FALSE	58.41	45	10	35	10	317	34.3	5.97	120.43	10	0	1.53767e+08	1.47276e+08	148686015
High	IsMasterProtein	P61204	ADP-ribosylation factor 3 OS=Homo sapiens OX=9606 GN=ARF3 PE=1 SV=2	0	FALSE	57.86	59	8	31	4	181	20.6	7.43	95.33	8	4	2.04203e+08	2.11739e+08	1.91266e+08
High	IsMasterProtein	P26639	Threonine--tRNA ligase 1, cytoplasmic OS=Homo sapiens OX=9606 GN=TARS1 PE=1 SV=3	0	FALSE	57.79	26	16	42	16	723	83.4	6.67	102.08	16	0	8.58201e+07	8.11377e+07	73798107
High	IsMasterProtein	Q9P258	Protein RCC2 OS=Homo sapiens OX=9606 GN=RCC2 PE=1 SV=2	0	FALSE	57.647	28	10	23	10	522	56	8.78	83.88	10	0	4.46046e+07	5.25681e+07	3.7264e+07
High	IsMasterProtein	Q07065	Cytoskeleton-associated protein 4 OS=Homo sapiens OX=9606 GN=CKAP4 PE=1 SV=2	0	FALSE	57.097	22	10	31	10	602	66	5.92	99.68	10	0	8.18657e+07	7.20854e+07	7.52748e+07
High	IsMasterProtein	O00410	Importin-5 OS=Homo sapiens OX=9606 GN=IPO5 PE=1 SV=4	0	FALSE	57.063	14	11	26	11	1097	123.6	4.94	85.05	11	0	6.21738e+07	6.72929e+07	64337296
High	IsMasterProtein	O60716	Catenin delta-1 OS=Homo sapiens OX=9606 GN=CTNND1 PE=1 SV=1	0	FALSE	56.879	15	10	25	10	968	108.1	6.23	82.64	10	0	4.16264e+07	4.83104e+07	4.15895e+07
High	IsMasterProtein	Q9Y5M8	Signal recognition particle receptor subunit beta OS=Homo sapiens OX=9606 GN=SRPRB PE=1 SV=3	0	FALSE	56.813	39	10	39	10	271	29.7	9.04	110.34	10	0	1.77681e+08	1.74689e+08	176213785
High	IsMasterProtein	P53621	Coatomer subunit alpha OS=Homo sapiens OX=9606 GN=COPA PE=1 SV=2	0	FALSE	56.224	14	16	41	16	1224	138.3	7.66	117.42	16	0	8.56955e+07	7.40101e+07	7.89464e+07
High	IsMasterProtein	P78344	Eukaryotic translation initiation factor 4 gamma 2 OS=Homo sapiens OX=9606 GN=EIF4G2 PE=1 SV=1	0	FALSE	55.966	18	15	37	15	907	102.3	7.14	89.56	15	0	9.15109e+07	8.91897e+07	8.47285e+07
High	IsMasterProtein	P55060	Exportin-2 OS=Homo sapiens OX=9606 GN=CSE1L PE=1 SV=3	0	FALSE	54.982	15	11	28	11	971	110.3	5.77	70.95	11	0	4.73975e+07	4.79384e+07	4.39012e+07
High	IsMasterProtein	O60884	DnaJ homolog subfamily A member 2 OS=Homo sapiens OX=9606 GN=DNAJA2 PE=1 SV=1	0	FALSE	54.982	33	10	32	10	412	45.7	6.48	75.5	10	0	6.5432e+07	6.65508e+07	5.79345e+07
High	IsMasterProtein	P46060	Ran GTPase-activating protein 1 OS=Homo sapiens OX=9606 GN=RANGAP1 PE=1 SV=1	0	FALSE	54.904	19	9	27	9	587	63.5	4.68	86.67	9	0	7.19262e+07	8.41181e+07	7.77209e+07
High	IsMasterProtein	Q13838	Spliceosome RNA helicase DDX39B OS=Homo sapiens OX=9606 GN=DDX39B PE=1 SV=1	0	FALSE	54.115	34	12	39	12	428	49	5.67	105.08	12	0	1.40365e+08	1.26679e+08	1.29846e+08
High	IsMasterProtein	P30101	Protein disulfide-isomerase A3 OS=Homo sapiens OX=9606 GN=PDIA3 PE=1 SV=4	0	FALSE	54.069	29	10	28	10	505	56.7	6.35	92.15	10	0	8.80478e+07	8.7032e+07	8.98781e+07
High	IsMasterProtein	P46782	40S ribosomal protein S5 OS=Homo sapiens OX=9606 GN=RPS5 PE=1 SV=4	0	FALSE	53.534	52	8	28	8	204	22.9	9.72	94.57	8	0	1.10045e+08	1.02104e+08	9.24419e+07
High	IsMasterProtein	P46109	Crk-like protein OS=Homo sapiens OX=9606 GN=CRKL PE=1 SV=1	0	FALSE	52.686	31	7	30	7	303	33.8	6.74	101.28	7	0	1.54024e+08	1.51356e+08	1.48324e+08
High	IsMasterProtein	Q14204	Cytoplasmic dynein 1 heavy chain 1 OS=Homo sapiens OX=9606 GN=DYNC1H1 PE=1 SV=5	0	FALSE	52.437	3	12	24	12	4646	532.1	6.4	61.44	12	0	3.12008e+07	2.73144e+07	3.00477e+07
High	IsMasterProtein	P50991	T-complex protein 1 subunit delta OS=Homo sapiens OX=9606 GN=CCT4 PE=1 SV=4	0	FALSE	52.365	29	12	30	11	539	57.9	7.83	77.23	12	1	1.08434e+08	1.05193e+08	94544564
High	IsMasterProtein	O95373	Importin-7 OS=Homo sapiens OX=9606 GN=IPO7 PE=1 SV=1	0	FALSE	52.104	13	11	25	11	1038	119.4	4.82	80.95	11	0	4.64379e+07	4.98514e+07	4.49041e+07
High	IsMasterProtein	P52209	6-phosphogluconate dehydrogenase, decarboxylating OS=Homo sapiens OX=9606 GN=PGD PE=1 SV=3	0	FALSE	51.994	35	11	31	11	483	53.1	7.23	85.92	11	0	7.37508e+07	7.67548e+07	7.00763e+07
High	IsMasterProtein	P62826	GTP-binding nuclear protein Ran OS=Homo sapiens OX=9606 GN=RAN PE=1 SV=3	0	FALSE	51.978	31	7	30	7	216	24.4	7.49	105.66	7	0	2.7966e+08	2.8056e+08	269025812
High	IsMasterProtein	Q8WVM8	Sec1 family domain-containing protein 1 OS=Homo sapiens OX=9606 GN=SCFD1 PE=1 SV=4	0	FALSE	51.417	20	8	20	8	642	72.3	6.27	86.55	8	0	4.19153e+07	4.35039e+07	38696710
High	IsMasterProtein	P56192	Methionine--tRNA ligase, cytoplasmic OS=Homo sapiens OX=9606 GN=MARS PE=1 SV=2	0	FALSE	51.351	17	10	26	10	900	101.1	6.16	81.71	10	0	5.46861e+07	5.47829e+07	4.60332e+07
High	IsMasterProtein	P49368	T-complex protein 1 subunit gamma OS=Homo sapiens OX=9606 GN=CCT3 PE=1 SV=4	0	FALSE	50.974	23	10	30	10	545	60.5	6.49	92.61	10	0	1.61053e+08	1.50401e+08	1.39154e+08
High	IsMasterProtein	O75534	Cold shock domain-containing protein E1 OS=Homo sapiens OX=9606 GN=CSDE1 PE=1 SV=2	0	FALSE	50.628	19	12	27	12	798	88.8	6.25	76.63	12	0	5.90497e+07	5.42075e+07	5.56879e+07
High	IsMasterProtein	Q7KZF4	Staphylococcal nuclease domain-containing protein 1 OS=Homo sapiens OX=9606 GN=SND1 PE=1 SV=1	0	FALSE	50.595	18	10	18	10	910	101.9	7.17	42.56	10	0	4.32632e+07	4.35417e+07	4.17246e+07
High	IsMasterProtein	Q9Y678	Coatomer subunit gamma-1 OS=Homo sapiens OX=9606 GN=COPG1 PE=1 SV=1	0	FALSE	50.484	16	10	30	8	874	97.7	5.47	68.98	10	2	1.04303e+08	1.18951e+08	9.0078e+07
High	IsMasterProtein	Q8TCJ2	Dolichyl-diphosphooligosaccharide--protein glycosyltransferase subunit STT3B OS=Homo sapiens OX=9606 GN=STT3B PE=1 SV=1	0	FALSE	49.358	12	10	31	9	826	93.6	8.91	80.48	10	1	5.02918e+07	5.16468e+07	4.4698e+07
High	IsMasterProtein	P22314	Ubiquitin-like modifier-activating enzyme 1 OS=Homo sapiens OX=9606 GN=UBA1 PE=1 SV=3	0	FALSE	48.86	12	8	17	8	1058	117.8	5.76	62.07	8	0	2.45231e+07	2.31838e+07	2.45835e+07
High	IsMasterProtein	Q9UHB9	Signal recognition particle subunit SRP68 OS=Homo sapiens OX=9606 GN=SRP68 PE=1 SV=2	0	FALSE	48.838	26	12	27	12	627	70.7	8.56	79.77	12	0	6.80501e+07	6.28372e+07	6.17612e+07
High	IsMasterProtein	P04406	Glyceraldehyde-3-phosphate dehydrogenase OS=Homo sapiens OX=9606 GN=GAPDH PE=1 SV=3	0	FALSE	48.359	35	8	28	8	335	36	8.46	94.16	8	0	9.81217e+07	1.01109e+08	9.08282e+07
High	IsMasterProtein	P06744	Glucose-6-phosphate isomerase OS=Homo sapiens OX=9606 GN=GPI PE=1 SV=4	0	FALSE	48.305	24	9	23	9	558	63.1	8.32	69.31	9	0	1.25192e+08	1.23829e+08	1.28664e+08
High	IsMasterProtein	Q99873	Protein arginine N-methyltransferase 1 OS=Homo sapiens OX=9606 GN=PRMT1 PE=1 SV=3	0	FALSE	47.542	42	12	28	12	371	42.4	5.35	81.61	12	0	7.43231e+07	7.44954e+07	6.64559e+07
High	IsMasterProtein	P27695	DNA-(apurinic or apyrimidinic site) lyase OS=Homo sapiens OX=9606 GN=APEX1 PE=1 SV=2	0	FALSE	47.186	33	8	30	8	318	35.5	8.12	80.18	8	0	6.39377e+07	6.34996e+07	5.57807e+07
High	IsMasterProtein	P55072	Transitional endoplasmic reticulum ATPase OS=Homo sapiens OX=9606 GN=VCP PE=1 SV=4	0	FALSE	45.708	15	8	25	8	806	89.3	5.26	76.41	8	0	2.85178e+07	2.84574e+07	2.989e+07
High	IsMasterProtein	Q9Y262	Eukaryotic translation initiation factor 3 subunit L OS=Homo sapiens OX=9606 GN=EIF3L PE=1 SV=1	0	FALSE	45.68	18	8	16	8	564	66.7	6.34	44.65	8	0	2.7834e+07	2.54919e+07	2.60866e+07
High	IsMasterProtein	P25705	ATP synthase subunit alpha, mitochondrial OS=Homo sapiens OX=9606 GN=ATP5F1A PE=1 SV=1	0	FALSE	45.62	24	9	23	9	553	59.7	9.13	78.85	9	0	5.53953e+07	5.60467e+07	5.16256e+07
High	IsMasterProtein	P14868	Aspartate--tRNA ligase, cytoplasmic OS=Homo sapiens OX=9606 GN=DARS PE=1 SV=2	0	FALSE	44.926	29	12	31	12	501	57.1	6.55	92.17	12	0	9.42542e+07	8.96806e+07	91329473
High	IsMasterProtein	Q6P2Q9	Pre-mRNA-processing-splicing factor 8 OS=Homo sapiens OX=9606 GN=PRPF8 PE=1 SV=2	0	FALSE	44.567	7	12	25	12	2335	273.4	8.84	60.19	12	0	4.10228e+07	4.10296e+07	3.93097e+07
High	IsMasterProtein	Q96CS3	FAS-associated factor 2 OS=Homo sapiens OX=9606 GN=FAF2 PE=1 SV=2	0	FALSE	44.509	24	7	15	7	445	52.6	5.62	56.77	7	0	4.30095e+07	4.42087e+07	4.34703e+07
High	IsMasterProtein	Q16630	Cleavage and polyadenylation specificity factor subunit 6 OS=Homo sapiens OX=9606 GN=CPSF6 PE=1 SV=2	0	FALSE	44.102	10	3	14	3	551	59.2	7.15	58.63	3	0	3.77805e+07	3.46315e+07	3.17269e+07
High	IsMasterProtein	P23588	Eukaryotic translation initiation factor 4B OS=Homo sapiens OX=9606 GN=EIF4B PE=1 SV=2	0	FALSE	42.776	16	8	21	8	611	69.1	5.73	67.67	8	0	5.60972e+07	4.74307e+07	5.56576e+07
High	IsMasterProtein	P06733	Alpha-enolase OS=Homo sapiens OX=9606 GN=ENO1 PE=1 SV=2	0	FALSE	42.725	22	7	19	5	434	47.1	7.39	61.97	7	1	3.73306e+07	3.86431e+07	39226946
High	IsMasterProtein	P50395	Rab GDP dissociation inhibitor beta OS=Homo sapiens OX=9606 GN=GDI2 PE=1 SV=2	0	FALSE	42.512	25	8	25	4	445	50.6	6.47	60.62	8	4	4.95667e+07	3.83019e+07	4.65815e+07
High	IsMasterProtein	Q15366	Poly(rC)-binding protein 2 OS=Homo sapiens OX=9606 GN=PCBP2 PE=1 SV=1	0	FALSE	41.902	24	6	24	5	365	38.6	6.79	75.11	6	0	1.12641e+08	1.15536e+08	116783732
High	IsMasterProtein	Q16531	DNA damage-binding protein 1 OS=Homo sapiens OX=9606 GN=DDB1 PE=1 SV=1	0	FALSE	41.716	9	8	23	8	1140	126.9	5.26	67.26	8	0	3.87291e+07	3.53578e+07	2.78966e+07
High	IsMasterProtein	P14625	Endoplasmin OS=Homo sapiens OX=9606 GN=HSP90B1 PE=1 SV=1	0	FALSE	41.341	15	12	34	11	803	92.4	4.84	79.89	12	0	6.44153e+07	6.14902e+07	5.43083e+07
High	IsMasterProtein	P27348	14-3-3 protein theta OS=Homo sapiens OX=9606 GN=YWHAQ PE=1 SV=1	0	FALSE	40.942	40	8	38	4	245	27.7	4.78	96.22	8	0	1.08543e+08	1.00235e+08	86070869
High	IsMasterProtein	Q8TEX9	Importin-4 OS=Homo sapiens OX=9606 GN=IPO4 PE=1 SV=2	0	FALSE	40.881	12	8	18	8	1081	118.6	4.96	51.59	8	0	1.91877e+07	1.73206e+07	1.67506e+07
High	IsMasterProtein	P62140	Serine/threonine-protein phosphatase PP1-beta catalytic subunit OS=Homo sapiens OX=9606 GN=PPP1CB PE=1 SV=3	0	FALSE	40.337	28	7	15	2	327	37.2	6.19	52.12	7	5	3.67998e+07	3.56617e+07	3.34315e+07
High	IsMasterProtein	P61247	40S ribosomal protein S3a OS=Homo sapiens OX=9606 GN=RPS3A PE=1 SV=2	0	FALSE	39.396	28	8	20	8	264	29.9	9.73	57.38	8	0	1.2811e+08	1.19627e+08	1.29559e+08
High	IsMasterProtein	P49959	Double-strand break repair protein MRE11 OS=Homo sapiens OX=9606 GN=MRE11 PE=1 SV=3	0	FALSE	39.177	15	7	19	7	708	80.5	5.9	58.21	7	0	4.02165e+07	4.05337e+07	3.93615e+07
High	IsMasterProtein	O95292	Vesicle-associated membrane protein-associated protein B/C OS=Homo sapiens OX=9606 GN=VAPB PE=1 SV=3	0	FALSE	39.037	20	5	28	5	243	27.2	7.3	96.6	5	0	8.78148e+07	9.38576e+07	9.36022e+07
High	IsMasterProtein	P19338	Nucleolin OS=Homo sapiens OX=9606 GN=NCL PE=1 SV=3	0	FALSE	39.015	15	8	20	8	710	76.6	4.7	52.3	8	0	5.96946e+07	6.01829e+07	5.57717e+07
High	IsMasterProtein	P31948	Stress-induced-phosphoprotein 1 OS=Homo sapiens OX=9606 GN=STIP1 PE=1 SV=1	0	FALSE	38.865	15	7	19	7	543	62.6	6.8	63.52	7	0	4.4567e+07	4.52207e+07	41783363
High	IsMasterProtein	P31943	Heterogeneous nuclear ribonucleoprotein H OS=Homo sapiens OX=9606 GN=HNRNPH1 PE=1 SV=4	0	FALSE	38.754	16	5	18	3	449	49.2	6.3	63.09	5	2	4.77208e+07	4.82769e+07	4.45101e+07
High	IsMasterProtein	O95433	Activator of 90 kDa heat shock protein ATPase homolog 1 OS=Homo sapiens OX=9606 GN=AHSA1 PE=1 SV=1	0	FALSE	38.375	18	6	15	6	338	38.3	5.53	44.69	6	0	4.63528e+07	4.15661e+07	3.97693e+07
High	IsMasterProtein	O15498	Synaptobrevin homolog YKT6 OS=Homo sapiens OX=9606 GN=YKT6 PE=1 SV=1	0	FALSE	38.322	40	6	23	6	198	22.4	6.92	67.4	6	0	8.38481e+07	8.85751e+07	6.73173e+07
High	IsMasterProtein	Q04917	14-3-3 protein eta OS=Homo sapiens OX=9606 GN=YWHAH PE=1 SV=4	0	FALSE	38.245	32	8	26	5	246	28.2	4.84	61.36	8	1	8.79557e+07	7.50092e+07	58383357
High	IsMasterProtein	Q9BQG0	Myb-binding protein 1A OS=Homo sapiens OX=9606 GN=MYBBP1A PE=1 SV=2	0	FALSE	38.084	8	7	13	7	1328	148.8	9.28	42.46	7	0	1.05007e+07	1.07651e+07	9.776e+06
High	IsMasterProtein	Q9UBF2	Coatomer subunit gamma-2 OS=Homo sapiens OX=9606 GN=COPG2 PE=1 SV=1	0	FALSE	38.01	13	8	20	6	871	97.6	5.81	43.75	8	0	1.37796e+07	5.67597e+06	7.42156e+06
High	IsMasterProtein	Q96QK1	Vacuolar protein sorting-associated protein 35 OS=Homo sapiens OX=9606 GN=VPS35 PE=1 SV=2	0	FALSE	37.803	15	9	17	9	796	91.6	5.49	42.52	9	0	2.48841e+07	2.47575e+07	2.38275e+07
High	IsMasterProtein	O95372	Acyl-protein thioesterase 2 OS=Homo sapiens OX=9606 GN=LYPLA2 PE=1 SV=1	0	FALSE	37.699	31	5	18	5	231	24.7	7.23	60.97	5	0	9.807e+07	9.27117e+07	85694076
High	IsMasterProtein	P05023	Sodium/potassium-transporting ATPase subunit alpha-1 OS=Homo sapiens OX=9606 GN=ATP1A1 PE=1 SV=1	0	FALSE	37.686	11	10	22	6	1023	112.8	5.49	55.19	10	4	5.61707e+07	5.50298e+07	5.32898e+07
High	IsMasterProtein	P33993	DNA replication licensing factor MCM7 OS=Homo sapiens OX=9606 GN=MCM7 PE=1 SV=4	0	FALSE	37.216	10	5	16	5	719	81.3	6.46	56.73	5	0	2.19951e+07	1.88903e+07	2.34564e+07
High	IsMasterProtein	Q86UP2	Kinectin OS=Homo sapiens OX=9606 GN=KTN1 PE=1 SV=1	0	FALSE	37.133	8	9	22	9	1357	156.2	5.64	69.61	9	0	3.56257e+07	3.79497e+07	29513607
High	IsMasterProtein	P41250	Glycine--tRNA ligase OS=Homo sapiens OX=9606 GN=GARS1 PE=1 SV=3	0	FALSE	37.124	13	7	19	7	739	83.1	7.03	62.06	7	0	3.44323e+07	3.14209e+07	3.53539e+07
High	IsMasterProtein	Q6Y7W6	GRB10-interacting GYF protein 2 OS=Homo sapiens OX=9606 GN=GIGYF2 PE=1 SV=1	0	FALSE	37.108	10	9	18	9	1299	150	5.54	61.99	9	0	3.38826e+07	3.79283e+07	3.56775e+07
High	IsMasterProtein	P84085	ADP-ribosylation factor 5 OS=Homo sapiens OX=9606 GN=ARF5 PE=1 SV=2	0	FALSE	36.901	39	5	25	1	180	20.5	6.79	75.43	5	0	2.51874e+07	2.04399e+07	2.32703e+07
High	IsMasterProtein	P54577	Tyrosine--tRNA ligase, cytoplasmic OS=Homo sapiens OX=9606 GN=YARS PE=1 SV=4	0	FALSE	36.719	20	10	28	10	528	59.1	7.05	76.15	10	0	5.1732e+07	5.61091e+07	5.15673e+07
High	IsMasterProtein	Q9P2J5	Leucine--tRNA ligase, cytoplasmic OS=Homo sapiens OX=9606 GN=LARS PE=1 SV=2	0	FALSE	36.714	9	10	23	10	1176	134.4	7.3	57.95	10	0	3.56857e+07	3.9864e+07	37589741
High	IsMasterProtein	P36873	Serine/threonine-protein phosphatase PP1-gamma catalytic subunit OS=Homo sapiens OX=9606 GN=PPP1CC PE=1 SV=1	0	FALSE	36.704	26	6	16	1	323	37	6.54	57.67	6	0	7.22395e+06	6.71336e+06	8810884
High	IsMasterProtein	P41252	Isoleucine--tRNA ligase, cytoplasmic OS=Homo sapiens OX=9606 GN=IARS PE=1 SV=2	0	FALSE	36.68	9	9	18	9	1262	144.4	6.15	38.89	9	0	3.94955e+07	3.86879e+07	3.34589e+07
High	IsMasterProtein	Q9HB71	Calcyclin-binding protein OS=Homo sapiens OX=9606 GN=CACYBP PE=1 SV=2	0	FALSE	36.554	32	5	20	5	228	26.2	8.25	81.21	5	0	9.65106e+07	9.30477e+07	86738596
High	IsMasterProtein	P62987	Ubiquitin-60S ribosomal protein L40 OS=Homo sapiens OX=9606 GN=UBA52 PE=1 SV=2	0	FALSE	36.422	52	7	53	1	128	14.7	9.83	93.58	7	0	653015	656769	466071
High	IsMasterProtein	Q15393	Splicing factor 3B subunit 3 OS=Homo sapiens OX=9606 GN=SF3B3 PE=1 SV=4	0	FALSE	36.337	9	9	17	9	1217	135.5	5.26	51.63	9	0	5.73393e+07	5.8059e+07	5.71239e+07
High	IsMasterProtein	P08243	Asparagine synthetase [glutamine-hydrolyzing] OS=Homo sapiens OX=9606 GN=ASNS PE=1 SV=4	0	FALSE	36.32	18	8	19	8	561	64.3	6.86	54.85	8	0	6.07326e+07	5.50322e+07	56705144
High	IsMasterProtein	P18085	ADP-ribosylation factor 4 OS=Homo sapiens OX=9606 GN=ARF4 PE=1 SV=3	0	FALSE	36.278	38	5	17	2	180	20.5	7.14	64.97	5	0	3.28606e+07	3.37798e+07	34868757
High	IsMasterProtein	P04844	Dolichyl-diphosphooligosaccharide--protein glycosyltransferase subunit 2 OS=Homo sapiens OX=9606 GN=RPN2 PE=1 SV=3	0	FALSE	35.906	14	5	13	5	631	69.2	5.69	53.8	5	0	2.3197e+07	2.26496e+07	2.24711e+07
High	IsMasterProtein	P12277	Creatine kinase B-type OS=Homo sapiens OX=9606 GN=CKB PE=1 SV=1	0	FALSE	35.835	25	7	18	7	381	42.6	5.59	55.32	7	0	6.06328e+07	5.77154e+07	5.87428e+07
High	IsMasterProtein	P62136	Serine/threonine-protein phosphatase PP1-alpha catalytic subunit OS=Homo sapiens OX=9606 GN=PPP1CA PE=1 SV=1	0	FALSE	35.766	25	6	14	1	330	37.5	6.33	48.4	6	0
High	IsMasterProtein	Q15631	Translin OS=Homo sapiens OX=9606 GN=TSN PE=1 SV=1	0	FALSE	35.758	45	7	19	7	228	26.2	6.44	63.27	7	0	4.03856e+07	4.10028e+07	3.93711e+07
High	IsMasterProtein	P05141	ADP/ATP translocase 2 OS=Homo sapiens OX=9606 GN=SLC25A5 PE=1 SV=7	0	FALSE	35.552	30	10	47	3	298	32.8	9.69	100	10	0	9.09028e+07	8.95261e+07	8.22583e+07
High	IsMasterProtein	P12236	ADP/ATP translocase 3 OS=Homo sapiens OX=9606 GN=SLC25A6 PE=1 SV=4	0	FALSE	35.465	41	11	44	4	298	32.8	9.74	99.42	11	7	4.91958e+08	5.22219e+08	5.07454e+08
High	IsMasterProtein	Q9Y2Z0	Protein SGT1 homolog OS=Homo sapiens OX=9606 GN=SUGT1 PE=1 SV=3	0	FALSE	35.184	25	6	18	6	365	41	5.16	63.74	6	0	4.13016e+07	3.94736e+07	37571431
High	IsMasterProtein	Q9Y617	Phosphoserine aminotransferase OS=Homo sapiens OX=9606 GN=PSAT1 PE=1 SV=2	0	FALSE	35.073	32	10	22	10	370	40.4	7.66	58.32	10	0	6.23602e+07	6.28838e+07	6.60994e+07
High	IsMasterProtein	P22626	Heterogeneous nuclear ribonucleoproteins A2/B1 OS=Homo sapiens OX=9606 GN=HNRNPA2B1 PE=1 SV=2	0	FALSE	34.905	26	9	21	9	353	37.4	8.95	62.98	9	0	7.7919e+07	7.79987e+07	7.16367e+07
High	IsMasterProtein	Q9NQ29	Putative RNA-binding protein Luc7-like 1 OS=Homo sapiens OX=9606 GN=LUC7L PE=1 SV=1	0	FALSE	34.794	20	7	27	2	371	43.7	9.92	78.89	7	0	2.98576e+07	2.95297e+07	3.30876e+07
High	IsMasterProtein	P31946	14-3-3 protein beta/alpha OS=Homo sapiens OX=9606 GN=YWHAB PE=1 SV=3	0	FALSE	34.696	30	6	30	2	246	28.1	4.83	82.93	6	0	1.16163e+07	1.19291e+07	1.13894e+07
High	IsMasterProtein	Q14247	Src substrate cortactin OS=Homo sapiens OX=9606 GN=CTTN PE=1 SV=2	0	FALSE	34.53	21	7	22	7	550	61.5	5.4	59.15	7	0	5.53708e+07	6.11686e+07	6.58174e+07
High	IsMasterProtein	P53396	ATP-citrate synthase OS=Homo sapiens OX=9606 GN=ACLY PE=1 SV=3	0	FALSE	34.473	9	10	24	10	1101	120.8	7.33	58.66	10	0	6.70238e+07	6.34461e+07	6.52792e+07
High	IsMasterProtein	P52272	Heterogeneous nuclear ribonucleoprotein M OS=Homo sapiens OX=9606 GN=HNRNPM PE=1 SV=3	0	FALSE	34.288	15	9	17	9	730	77.5	8.7	53.63	9	0	5.34416e+07	5.38753e+07	5.0907e+07
High	IsMasterProtein	P63241	Eukaryotic translation initiation factor 5A-1 OS=Homo sapiens OX=9606 GN=EIF5A PE=1 SV=2	0	FALSE	34.265	56	6	16	6	154	16.8	5.24	53.05	6	0	6.86045e+07	6.65113e+07	6.4724e+07
High	IsMasterProtein	Q96P70	Importin-9 OS=Homo sapiens OX=9606 GN=IPO9 PE=1 SV=3	0	FALSE	34.194	6	3	9	3	1041	115.9	4.81	29.98	3	0	3.62701e+06	2.18428e+06	2.05014e+06
High	IsMasterProtein	P22087	rRNA 2'-O-methyltransferase fibrillarin OS=Homo sapiens OX=9606 GN=FBL PE=1 SV=2	0	FALSE	34.053	30	6	14	6	321	33.8	10.18	50.32	6	0	5.00035e+07	3.87201e+07	4.57548e+07
High	IsMasterProtein	P26368	Splicing factor U2AF 65 kDa subunit OS=Homo sapiens OX=9606 GN=U2AF2 PE=1 SV=4	0	FALSE	33.643	19	6	18	6	475	53.5	9.09	58.78	6	0	4.45782e+07	4.67806e+07	2.7975e+07
High	IsMasterProtein	P56181-2	Isoform 2 of NADH dehydrogenase [ubiquinone] flavoprotein 3, mitochondrial OS=Homo sapiens OX=9606 GN=NDUFV3	0	FALSE	33.433	20	9	22	9	473	51	9.17	52.52	9	0	5.77254e+07	5.53126e+07	5.65627e+07
High	IsMasterProtein	P23526	Adenosylhomocysteinase OS=Homo sapiens OX=9606 GN=AHCY PE=1 SV=4	0	FALSE	33.07	22	8	23	8	432	47.7	6.34	62.65	8	0	7.26311e+07	6.79535e+07	6.50948e+07
High	IsMasterProtein	P61981	14-3-3 protein gamma OS=Homo sapiens OX=9606 GN=YWHAG PE=1 SV=2	0	FALSE	32.926	30	6	26	3	247	28.3	4.89	66.81	6	0	1.37573e+07	1.29116e+07	5606311
High	IsMasterProtein	P61163	Alpha-centractin OS=Homo sapiens OX=9606 GN=ACTR1A PE=1 SV=1	0	FALSE	32.866	26	5	13	5	376	42.6	6.64	37.34	5	0	1.96225e+07	1.61848e+07	1.78002e+07
High	IsMasterProtein	O43707	Alpha-actinin-4 OS=Homo sapiens OX=9606 GN=ACTN4 PE=1 SV=2	0	FALSE	32.726	11	8	14	6	911	104.8	5.44	44.55	8	2	2.63665e+07	2.37454e+07	2.6588e+07
High	IsMasterProtein	Q86VP6	Cullin-associated NEDD8-dissociated protein 1 OS=Homo sapiens OX=9606 GN=CAND1 PE=1 SV=2	0	FALSE	32.651	8	8	14	8	1230	136.3	5.78	34.7	8	0	2.55136e+07	2.57243e+07	2.53536e+07
High	IsMasterProtein	P55036	26S proteasome non-ATPase regulatory subunit 4 OS=Homo sapiens OX=9606 GN=PSMD4 PE=1 SV=1	0	FALSE	32.222	25	6	17	6	377	40.7	4.79	61.33	6	0	5.95436e+07	5.87716e+07	5.8439e+07
High	IsMasterProtein	P52597	Heterogeneous nuclear ribonucleoprotein F OS=Homo sapiens OX=9606 GN=HNRNPF PE=1 SV=3	0	FALSE	32.071	11	3	15	1	415	45.6	5.58	53.91	3	0	9.48308e+06	1.00148e+07	6.50221e+06
High	IsMasterProtein	P51648	Aldehyde dehydrogenase family 3 member A2 OS=Homo sapiens OX=9606 GN=ALDH3A2 PE=1 SV=1	0	FALSE	32.045	15	6	18	6	485	54.8	7.88	50.14	6	0	4.15321e+07	3.39336e+07	3.94199e+07
High	IsMasterProtein	P15880	40S ribosomal protein S2 OS=Homo sapiens OX=9606 GN=RPS2 PE=1 SV=2	0	FALSE	31.885	30	8	19	8	293	31.3	10.24	47.44	8	0	7.74902e+07	7.17711e+07	7.02814e+07
High	IsMasterProtein	Q13190	Syntaxin-5 OS=Homo sapiens OX=9606 GN=STX5 PE=1 SV=2	0	FALSE	31.725	24	5	11	5	355	39.6	9.16	40.67	5	0	2.68313e+07	3.05222e+07	2.98418e+07
High	IsMasterProtein	P27797	Calreticulin OS=Homo sapiens OX=9606 GN=CALR PE=1 SV=1	0	FALSE	31.377	23	6	16	6	417	48.1	4.44	39.49	6	0	3.26779e+07	3.15648e+07	2.65507e+07
High	IsMasterProtein	P60891	Ribose-phosphate pyrophosphokinase 1 OS=Homo sapiens OX=9606 GN=PRPS1 PE=1 SV=2	0	FALSE	31.24	26	7	17	7	318	34.8	6.98	44.33	7	0	4.2201e+07	3.90057e+07	3.13429e+07
High	IsMasterProtein	P46777	60S ribosomal protein L5 OS=Homo sapiens OX=9606 GN=RPL5 PE=1 SV=3	0	FALSE	31.117	27	7	19	7	297	34.3	9.72	52.19	7	0	1.18229e+08	1.14399e+08	1.21526e+08
High	IsMasterProtein	P62241	40S ribosomal protein S8 OS=Homo sapiens OX=9606 GN=RPS8 PE=1 SV=2	0	FALSE	30.189	35	6	14	6	208	24.2	10.32	37.49	6	0	3.24293e+07	3.43372e+07	3.17678e+07
High	IsMasterProtein	O75643	U5 small nuclear ribonucleoprotein 200 kDa helicase OS=Homo sapiens OX=9606 GN=SNRNP200 PE=1 SV=2	0	FALSE	30.081	5	7	10	7	2136	244.4	6.06	24.33	7	0	1.2448e+07	1.22174e+07	9.22015e+06
High	IsMasterProtein	O00264	Membrane-associated progesterone receptor component 1 OS=Homo sapiens OX=9606 GN=PGRMC1 PE=1 SV=3	0	FALSE	29.897	48	6	19	5	195	21.7	4.7	47.71	6	1	1.14892e+08	1.17899e+08	113187089
High	IsMasterProtein	P39656	Dolichyl-diphosphooligosaccharide--protein glycosyltransferase 48 kDa subunit OS=Homo sapiens OX=9606 GN=DDOST PE=1 SV=4	0	FALSE	29.845	23	9	27	9	456	50.8	6.55	63.81	9	0	7.61455e+07	7.36469e+07	6.54892e+07
High	IsMasterProtein	Q92575	UBX domain-containing protein 4 OS=Homo sapiens OX=9606 GN=UBXN4 PE=1 SV=2	0	FALSE	29.713	17	6	13	6	508	56.7	6.38	38.92	6	0	3.28438e+07	2.60524e+07	2.98782e+07
High	IsMasterProtein	P31150	Rab GDP dissociation inhibitor alpha OS=Homo sapiens OX=9606 GN=GDI1 PE=1 SV=2	0	FALSE	29.706	16	5	13	1	447	50.6	5.14	40.47	5	0	1.37358e+06	1.45919e+06	1.18216e+06
High	IsMasterProtein	P35606	Coatomer subunit beta' OS=Homo sapiens OX=9606 GN=COPB2 PE=1 SV=2	0	FALSE	29.575	10	6	11	6	906	102.4	5.27	29.59	6	0	2.36367e+07	2.28571e+07	2.19059e+07
High	IsMasterProtein	P50402	Emerin OS=Homo sapiens OX=9606 GN=EMD PE=1 SV=1	0	FALSE	28.906	20	5	19	5	254	29	5.5	59.37	5	0	5.8083e+07	5.77094e+07	52457488
High	IsMasterProtein	Q9Y4E8	Ubiquitin carboxyl-terminal hydrolase 15 OS=Homo sapiens OX=9606 GN=USP15 PE=1 SV=3	0	FALSE	28.659	7	5	11	5	981	112.3	5.22	33.45	5	0	1.41786e+07	1.21551e+07	1.23348e+07
High	IsMasterProtein	Q8NC51	Plasminogen activator inhibitor 1 RNA-binding protein OS=Homo sapiens OX=9606 GN=SERBP1 PE=1 SV=2	0	FALSE	28.658	18	6	16	6	408	44.9	8.65	61.57	6	0	3.62233e+07	3.00611e+07	3.55113e+07
High	IsMasterProtein	P17812	CTP synthase 1 OS=Homo sapiens OX=9606 GN=CTPS1 PE=1 SV=2	0	FALSE	28.595	11	5	12	5	591	66.6	6.46	38.39	5	0	2.06795e+07	1.91571e+07	1.91563e+07
High	IsMasterProtein	P39023	60S ribosomal protein L3 OS=Homo sapiens OX=9606 GN=RPL3 PE=1 SV=2	0	FALSE	28.534	14	5	12	5	403	46.1	10.18	37.04	5	0	3.93869e+07	4.14567e+07	4.41749e+07
High	IsMasterProtein	A0FGR8	Extended synaptotagmin-2 OS=Homo sapiens OX=9606 GN=ESYT2 PE=1 SV=1	0	FALSE	28.329	9	6	16	6	921	102.3	9.26	56.99	6	0	2.57455e+07	2.87752e+07	2.64991e+07
High	IsMasterProtein	Q99832	T-complex protein 1 subunit eta OS=Homo sapiens OX=9606 GN=CCT7 PE=1 SV=2	0	FALSE	27.851	16	6	13	6	543	59.3	7.65	35.12	6	0	3.16384e+07	2.59551e+07	2.72027e+07
High	IsMasterProtein	P49720	Proteasome subunit beta type-3 OS=Homo sapiens OX=9606 GN=PSMB3 PE=1 SV=2	0	FALSE	27.649	26	4	15	4	205	22.9	6.55	47.2	4	0	3.61426e+07	3.15473e+07	2.91774e+07
High	IsMasterProtein	P30041	Peroxiredoxin-6 OS=Homo sapiens OX=9606 GN=PRDX6 PE=1 SV=3	0	FALSE	27.599	33	9	26	9	224	25	6.38	47.55	9	0	1.07405e+08	1.1172e+08	99702274
High	IsMasterProtein	B5ME19	Eukaryotic translation initiation factor 3 subunit C-like protein OS=Homo sapiens OX=9606 GN=EIF3CL PE=1 SV=1	0	FALSE	27.57	8	6	13	6	914	105.4	5.64	37.91	6	0	2.36337e+07	2.47378e+07	2.02973e+07
High	IsMasterProtein	P61313	60S ribosomal protein L15 OS=Homo sapiens OX=9606 GN=RPL15 PE=1 SV=2	0	FALSE	27.561	32	7	25	7	204	24.1	11.62	67.07	7	0	9.59693e+07	7.7583e+07	85681066
High	IsMasterProtein	Q16850	Lanosterol 14-alpha demethylase OS=Homo sapiens OX=9606 GN=CYP51A1 PE=1 SV=3	0	FALSE	27.33	11	3	13	3	503	56.8	8.53	41.78	3	0	7.75978e+06	5.62803e+06	6.4792e+06
High	IsMasterProtein	P27635	60S ribosomal protein L10 OS=Homo sapiens OX=9606 GN=RPL10 PE=1 SV=4	0	FALSE	27.191	29	7	27	7	214	24.6	10.08	50.58	7	0	1.3477e+08	1.20294e+08	1.19102e+08
High	IsMasterProtein	Q13085	Acetyl-CoA carboxylase 1 OS=Homo sapiens OX=9606 GN=ACACA PE=1 SV=2	0	FALSE	27.097	3	5	12	5	2346	265.4	6.37	40.65	5	0	2.76194e+07	2.68718e+07	2.34273e+07
High	IsMasterProtein	P18669	Phosphoglycerate mutase 1 OS=Homo sapiens OX=9606 GN=PGAM1 PE=1 SV=2	0	FALSE	27.004	27	5	11	5	254	28.8	7.18	35.23	5	0	3.58427e+07	3.6699e+07	34913443
High	IsMasterProtein	Q12931	Heat shock protein 75 kDa, mitochondrial OS=Homo sapiens OX=9606 GN=TRAP1 PE=1 SV=3	0	FALSE	27.004	12	7	11	6	704	80.1	8.21	29.36	7	0	4.04389e+07	8.61706e+07	3.48524e+07
High	IsMasterProtein	Q9P0L0	Vesicle-associated membrane protein-associated protein A OS=Homo sapiens OX=9606 GN=VAPA PE=1 SV=3	0	FALSE	26.995	15	3	17	3	249	27.9	8.62	53.88	3	0	5.63275e+07	4.82651e+07	5.52354e+07
High	IsMasterProtein	Q15738	Sterol-4-alpha-carboxylate 3-dehydrogenase, decarboxylating OS=Homo sapiens OX=9606 GN=NSDHL PE=1 SV=2	0	FALSE	26.866	18	4	8	4	373	41.9	8.06	24.05	4	0	1.50929e+07	1.65986e+07	1.39383e+07
High	IsMasterProtein	Q6NUQ4	Transmembrane protein 214 OS=Homo sapiens OX=9606 GN=TMEM214 PE=1 SV=2	0	FALSE	26.767	12	6	11	6	689	77.1	9.14	34.07	6	0	1.93187e+07	2.06003e+07	1.90408e+07
High	IsMasterProtein	P04181	Ornithine aminotransferase, mitochondrial OS=Homo sapiens OX=9606 GN=OAT PE=1 SV=1	0	FALSE	26.647	18	5	10	5	439	48.5	7.03	32.75	5	0	1.49266e+07	1.67508e+07	1.35467e+07
High	IsMasterProtein	P62701	40S ribosomal protein S4, X isoform OS=Homo sapiens OX=9606 GN=RPS4X PE=1 SV=2	0	FALSE	26.453	24	8	23	8	263	29.6	10.15	57.56	8	0	6.94975e+07	6.16627e+07	5.79258e+07
High	IsMasterProtein	Q9NTJ3	Structural maintenance of chromosomes protein 4 OS=Homo sapiens OX=9606 GN=SMC4 PE=1 SV=2	0	FALSE	26.452	4	5	10	5	1288	147.1	6.79	26.55	5	0	1.1644e+07	1.05832e+07	8.82376e+06
High	IsMasterProtein	P17844	Probable ATP-dependent RNA helicase DDX5 OS=Homo sapiens OX=9606 GN=DDX5 PE=1 SV=1	0	FALSE	26.369	14	8	15	8	614	69.1	8.92	33.08	8	0	4.86595e+07	4.81493e+07	4.37126e+07
High	IsMasterProtein	Q9Y4P3	Transducin beta-like protein 2 OS=Homo sapiens OX=9606 GN=TBL2 PE=1 SV=1	0	FALSE	26.25	15	5	17	5	447	49.8	9.44	48.09	5	0	2.40109e+07	2.21869e+07	2.603e+07
High	IsMasterProtein	P09429	High mobility group protein B1 OS=Homo sapiens OX=9606 GN=HMGB1 PE=1 SV=3	0	FALSE	26.237	29	5	14	5	215	24.9	5.74	45.88	5	0	6.78539e+07	6.71412e+07	65580432
High	IsMasterProtein	P09960	Leukotriene A-4 hydrolase OS=Homo sapiens OX=9606 GN=LTA4H PE=1 SV=2	0	FALSE	25.799	16	7	12	7	611	69.2	6.18	29.97	7	0	2.11757e+07	2.1842e+07	1.97464e+07
High	IsMasterProtein	Q9P035	Very-long-chain (3R)-3-hydroxyacyl-CoA dehydratase 3 OS=Homo sapiens OX=9606 GN=HACD3 PE=1 SV=2	0	FALSE	25.794	19	5	18	5	362	43.1	8.94	55.85	5	0	4.76879e+07	4.23409e+07	4.37481e+07
High	IsMasterProtein	Q9H4A4	Aminopeptidase B OS=Homo sapiens OX=9606 GN=RNPEP PE=1 SV=2	0	FALSE	25.466	13	7	13	7	650	72.5	5.74	33.74	7	0	2.3625e+07	2.38268e+07	2.21809e+07
High	IsMasterProtein	P62906	60S ribosomal protein L10a OS=Homo sapiens OX=9606 GN=RPL10A PE=1 SV=2	0	FALSE	25.42	27	5	16	5	217	24.8	9.94	44.76	5	0	7.02611e+07	6.6758e+07	6.33631e+07
High	IsMasterProtein	O75663	TIP41-like protein OS=Homo sapiens OX=9606 GN=TIPRL PE=1 SV=2	0	FALSE	25.412	32	6	17	6	272	31.4	5.91	51.96	6	0	5.28626e+07	5.04902e+07	4.89258e+07
High	IsMasterProtein	Q92598	Heat shock protein 105 kDa OS=Homo sapiens OX=9606 GN=HSPH1 PE=1 SV=1	0	FALSE	25.396	8	5	10	5	858	96.8	5.39	30.13	5	0	1.17281e+07	1.11012e+07	1.64958e+07
High	IsMasterProtein	P55786	Puromycin-sensitive aminopeptidase OS=Homo sapiens OX=9606 GN=NPEPPS PE=1 SV=2	0	FALSE	25.38	9	7	17	7	919	103.2	5.72	41.21	7	0	2.37317e+07	2.29322e+07	18816198
High	IsMasterProtein	Q15365	Poly(rC)-binding protein 1 OS=Homo sapiens OX=9606 GN=PCBP1 PE=1 SV=2	0	FALSE	25.374	21	6	17	5	356	37.5	7.09	49.09	6	1	5.99767e+07	4.84009e+07	56994520
High	IsMasterProtein	P11021	Endoplasmic reticulum chaperone BiP OS=Homo sapiens OX=9606 GN=HSPA5 PE=1 SV=2	0	FALSE	25.354	9	5	20	2	654	72.3	5.16	52.08	5	0	5.65818e+06	4.98233e+06	5.37092e+06
High	IsMasterProtein	Q96FW1	Ubiquitin thioesterase OTUB1 OS=Homo sapiens OX=9606 GN=OTUB1 PE=1 SV=2	0	FALSE	25.198	23	5	11	5	271	31.3	4.94	28.17	5	0	2.12685e+07	2.21578e+07	1.91831e+07
High	IsMasterProtein	Q9H6S0	3'-5' RNA helicase YTHDC2 OS=Homo sapiens OX=9606 GN=YTHDC2 PE=1 SV=2	0	FALSE	25.062	7	9	17	9	1430	160.1	8.4	42.28	9	0	4.21913e+07	4.0609e+07	4.02337e+07
High	IsMasterProtein	P16615	Sarcoplasmic/endoplasmic reticulum calcium ATPase 2 OS=Homo sapiens OX=9606 GN=ATP2A2 PE=1 SV=1	0	FALSE	24.784	6	6	12	6	1042	114.7	5.34	37.3	6	0	7.94488e+07	6.55967e+07	6.99656e+07
High	IsMasterProtein	Q13148	TAR DNA-binding protein 43 OS=Homo sapiens OX=9606 GN=TARDBP PE=1 SV=1	0	FALSE	23.745	18	5	13	5	414	44.7	6.19	48.39	5	0	3.6014e+07	3.67729e+07	3.7153e+07
High	IsMasterProtein	P61619	Protein transport protein Sec61 subunit alpha isoform 1 OS=Homo sapiens OX=9606 GN=SEC61A1 PE=1 SV=2	0	FALSE	23.557	16	5	9	5	476	52.2	8.06	24.38	5	0	4.36518e+07	4.14138e+07	4.36636e+07
High	IsMasterProtein	Q13155	Aminoacyl tRNA synthase complex-interacting multifunctional protein 2 OS=Homo sapiens OX=9606 GN=AIMP2 PE=1 SV=2	0	FALSE	23.49	17	4	13	4	320	35.3	8.22	38.01	4	0	2.92157e+07	3.22474e+07	2.95689e+07
High	IsMasterProtein	P25685	DnaJ homolog subfamily B member 1 OS=Homo sapiens OX=9606 GN=DNAJB1 PE=1 SV=4	0	FALSE	23.419	17	5	10	5	340	38	8.63	30.21	5	0	3.27916e+07	3.22733e+07	3.37866e+07
High	IsMasterProtein	P32969	60S ribosomal protein L9 OS=Homo sapiens OX=9606 GN=RPL9 PE=1 SV=1	0	FALSE	23.405	34	4	12	4	192	21.9	9.95	48.88	4	0	2.88226e+07	3.13216e+07	2.8308e+07
High	IsMasterProtein	O95573	Long-chain-fatty-acid--CoA ligase 3 OS=Homo sapiens OX=9606 GN=ACSL3 PE=1 SV=3	0	FALSE	23.396	12	7	14	7	720	80.4	8.38	35.75	7	0	2.72701e+07	2.58415e+07	2.44119e+07
High	IsMasterProtein	P37837	Transaldolase OS=Homo sapiens OX=9606 GN=TALDO1 PE=1 SV=2	0	FALSE	23.377	20	7	14	7	337	37.5	6.81	29.81	7	0	4.78217e+07	4.6506e+07	4.59591e+07
High	IsMasterProtein	Q8N4V1	Membrane magnesium transporter 1 OS=Homo sapiens OX=9606 GN=MMGT1 PE=1 SV=1	0	FALSE	23.315	29	3	11	3	131	14.7	9.16	35.89	3	0	5.12641e+07	2.37267e+07	50593413
High	IsMasterProtein	Q96AG4	Leucine-rich repeat-containing protein 59 OS=Homo sapiens OX=9606 GN=LRRC59 PE=1 SV=1	0	FALSE	23.074	21	5	15	5	307	34.9	9.57	52.08	5	0	5.17915e+07	5.88372e+07	5.63337e+07
High	IsMasterProtein	P31939	Bifunctional purine biosynthesis protein PURH OS=Homo sapiens OX=9606 GN=ATIC PE=1 SV=3	0	FALSE	23.063	16	5	6	5	592	64.6	6.71	21.78	5	0	8.24507e+06	9.46703e+06	9.13605e+06
High	IsMasterProtein	Q15813	Tubulin-specific chaperone E OS=Homo sapiens OX=9606 GN=TBCE PE=1 SV=1	0	FALSE	22.923	11	4	7	4	527	59.3	6.76	21.03	4	0	7.17784e+06	7.26177e+06	6.01092e+06
High	IsMasterProtein	P07737	Profilin-1 OS=Homo sapiens OX=9606 GN=PFN1 PE=1 SV=2	0	FALSE	22.837	55	6	16	6	140	15	8.27	37.08	6	0	4.71887e+07	5.25128e+07	4.98441e+07
High	IsMasterProtein	P32119	Peroxiredoxin-2 OS=Homo sapiens OX=9606 GN=PRDX2 PE=1 SV=5	0	FALSE	22.813	40	6	16	5	198	21.9	5.97	45.35	6	0	2.81609e+07	3.00611e+07	2.52492e+07
High	IsMasterProtein	O43175	D-3-phosphoglycerate dehydrogenase OS=Homo sapiens OX=9606 GN=PHGDH PE=1 SV=4	0	FALSE	22.685	16	8	22	8	533	56.6	6.71	41.29	8	0	6.82774e+07	6.94573e+07	6.86221e+07
High	IsMasterProtein	Q13501	Sequestosome-1 OS=Homo sapiens OX=9606 GN=SQSTM1 PE=1 SV=1	0	FALSE	22.553	3	2	6	2	440	47.7	5.22	23.97	2	0	1.15093e+07	4.10959e+06	1.35018e+07
High	IsMasterProtein	Q00341	Vigilin OS=Homo sapiens OX=9606 GN=HDLBP PE=1 SV=2	0	FALSE	22.498	5	4	6	4	1268	141.4	6.87	20.37	4	0	1.25254e+07	9.96897e+06	1.06968e+07
High	IsMasterProtein	Q13283	Ras GTPase-activating protein-binding protein 1 OS=Homo sapiens OX=9606 GN=G3BP1 PE=1 SV=1	0	FALSE	22.371	17	5	10	5	466	52.1	5.52	29.76	5	0	1.50975e+07	1.47624e+07	13893047
High	IsMasterProtein	P23528	Cofilin-1 OS=Homo sapiens OX=9606 GN=CFL1 PE=1 SV=3	0	FALSE	22.355	37	6	12	6	166	18.5	8.09	30.04	6	0	3.03756e+07	2.81435e+07	2.97399e+07
High	IsMasterProtein	P18031	Tyrosine-protein phosphatase non-receptor type 1 OS=Homo sapiens OX=9606 GN=PTPN1 PE=1 SV=1	0	FALSE	22.353	16	5	10	5	435	49.9	6.27	32.8	5	0	2.78721e+07	2.5746e+07	2.42488e+07
High	IsMasterProtein	Q5HYI8	Rab-like protein 3 OS=Homo sapiens OX=9606 GN=RABL3 PE=1 SV=1	0	FALSE	22.271	22	4	11	4	236	26.4	7.11	34.13	4	0	2.24356e+07	2.1474e+07	1.89828e+07
High	IsMasterProtein	P25789	Proteasome subunit alpha type-4 OS=Homo sapiens OX=9606 GN=PSMA4 PE=1 SV=1	0	FALSE	22.124	21	4	12	4	261	29.5	7.72	34.85	4	0	2.77387e+07	2.79831e+07	2.4244e+07
High	IsMasterProtein	P33240	Cleavage stimulation factor subunit 2 OS=Homo sapiens OX=9606 GN=CSTF2 PE=1 SV=1	0	FALSE	22.118	13	6	13	6	577	60.9	6.83	26.19	6	0	1.96906e+07	1.9959e+07	2.32716e+07
High	IsMasterProtein	O00232	26S proteasome non-ATPase regulatory subunit 12 OS=Homo sapiens OX=9606 GN=PSMD12 PE=1 SV=3	0	FALSE	22.089	15	6	14	6	456	52.9	7.65	39.23	6	0	4.64502e+07	4.88323e+07	4.34727e+07
High	IsMasterProtein	Q9NR31	GTP-binding protein SAR1a OS=Homo sapiens OX=9606 GN=SAR1A PE=1 SV=1	0	FALSE	21.982	20	3	11	3	198	22.4	6.68	29.21	3	0	1.77392e+07	1.45043e+07	1.7006e+07
High	IsMasterProtein	P22392-2	Isoform 3 of Nucleoside diphosphate kinase B OS=Homo sapiens OX=9606 GN=NME2	0	FALSE	21.86	32	6	22	3	267	30.1	8.92	52.41	6	3	8.1548e+07	7.80748e+07	7.26975e+07
High	IsMasterProtein	P45880	Voltage-dependent anion-selective channel protein 2 OS=Homo sapiens OX=9606 GN=VDAC2 PE=1 SV=2	0	FALSE	21.821	32	7	18	7	294	31.5	7.56	49.5	7	0	3.72384e+07	3.36886e+07	3.51571e+07
High	IsMasterProtein	Q15758	Neutral amino acid transporter B(0) OS=Homo sapiens OX=9606 GN=SLC1A5 PE=1 SV=2	0	FALSE	21.656	9	3	9	3	541	56.6	5.48	32.29	3	0	1.97607e+07	1.85133e+07	2.12716e+07
High	IsMasterProtein	O15371	Eukaryotic translation initiation factor 3 subunit D OS=Homo sapiens OX=9606 GN=EIF3D PE=1 SV=1	0	FALSE	21.567	11	5	12	5	548	63.9	6.05	41.47	5	0	3.89068e+07	4.08682e+07	38078280
High	IsMasterProtein	Q8N3F8	MICAL-like protein 1 OS=Homo sapiens OX=9606 GN=MICALL1 PE=1 SV=2	0	FALSE	21.538	6	4	8	4	863	93.4	7.25	20.89	4	0	1.56031e+07	1.23451e+07	8.95501e+06
High	IsMasterProtein	Q9NR30	Nucleolar RNA helicase 2 OS=Homo sapiens OX=9606 GN=DDX21 PE=1 SV=5	0	FALSE	21.334	10	5	8	5	783	87.3	9.28	25.8	5	0	1.70441e+07	1.46685e+07	1.64674e+07
High	IsMasterProtein	Q9Y5B9	FACT complex subunit SPT16 OS=Homo sapiens OX=9606 GN=SUPT16H PE=1 SV=1	0	FALSE	21.096	7	7	18	7	1047	119.8	5.66	41.93	7	0	3.19545e+07	3.25119e+07	33276877
High	IsMasterProtein	P25398	40S ribosomal protein S12 OS=Homo sapiens OX=9606 GN=RPS12 PE=1 SV=3	0	FALSE	21.004	25	3	11	3	132	14.5	7.21	34.79	3	0	2.37026e+07	2.31121e+07	2.15849e+07
High	IsMasterProtein	P33992	DNA replication licensing factor MCM5 OS=Homo sapiens OX=9606 GN=MCM5 PE=1 SV=5	0	FALSE	20.944	9	5	7	5	734	82.2	8.37	18.84	5	0	9.09644e+06	1.47979e+07	1.68389e+07
High	IsMasterProtein	Q01081	Splicing factor U2AF 35 kDa subunit OS=Homo sapiens OX=9606 GN=U2AF1 PE=1 SV=3	0	FALSE	20.801	20	4	12	4	240	27.9	8.81	38.9	4	0	4.02931e+07	3.79383e+07	4.15518e+07
High	IsMasterProtein	P40925	Malate dehydrogenase, cytoplasmic OS=Homo sapiens OX=9606 GN=MDH1 PE=1 SV=4	0	FALSE	20.668	21	5	11	5	334	36.4	7.36	30.25	5	0	2.46101e+07	2.95354e+07	23261714
High	IsMasterProtein	P41091	Eukaryotic translation initiation factor 2 subunit 3 OS=Homo sapiens OX=9606 GN=EIF2S3 PE=1 SV=3	0	FALSE	20.298	13	5	16	5	472	51.1	8.4	36.36	5	0	3.85477e+07	3.22367e+07	2.64889e+07
High	IsMasterProtein	P62888	60S ribosomal protein L30 OS=Homo sapiens OX=9606 GN=RPL30 PE=1 SV=2	0	FALSE	20.298	46	4	10	4	115	12.8	9.63	24.82	4	0	2.71723e+07	2.58522e+07	2.71651e+07
High	IsMasterProtein	Q12905	Interleukin enhancer-binding factor 2 OS=Homo sapiens OX=9606 GN=ILF2 PE=1 SV=2	0	FALSE	20.278	21	5	7	5	390	43	5.26	23.79	5	0	1.78311e+07	2.11056e+07	1.69528e+07
High	IsMasterProtein	P17858	ATP-dependent 6-phosphofructokinase, liver type OS=Homo sapiens OX=9606 GN=PFKL PE=1 SV=6	0	FALSE	20.274	8	5	9	5	780	85	7.5	24.56	5	0	1.16538e+07	9.98747e+06	1.14264e+07
High	IsMasterProtein	Q9UNM6	26S proteasome non-ATPase regulatory subunit 13 OS=Homo sapiens OX=9606 GN=PSMD13 PE=1 SV=2	0	FALSE	20.057	14	4	6	4	376	42.9	5.81	17.79	4	0	7.92593e+06	8.67962e+06	9.10382e+06
High	IsMasterProtein	Q5JTV8-3	Isoform 3 of Torsin-1A-interacting protein 1 OS=Homo sapiens OX=9606 GN=TOR1AIP1	0	FALSE	19.936	11	5	13	5	584	66.3	8.18	40.41	5	0	3.60007e+07	3.74701e+07	35683750
High	IsMasterProtein	P12004	Proliferating cell nuclear antigen OS=Homo sapiens OX=9606 GN=PCNA PE=1 SV=1	0	FALSE	19.921	16	3	9	3	261	28.8	4.69	31.16	3	0	2.63039e+07	2.57434e+07	22563941
High	IsMasterProtein	Q9Y277	Voltage-dependent anion-selective channel protein 3 OS=Homo sapiens OX=9606 GN=VDAC3 PE=1 SV=1	0	FALSE	19.828	20	4	12	4	283	30.6	8.66	46.41	4	0	4.64619e+07	4.71472e+07	37414174
High	IsMasterProtein	P38919	Eukaryotic initiation factor 4A-III OS=Homo sapiens OX=9606 GN=EIF4A3 PE=1 SV=4	0	FALSE	19.703	17	7	14	5	411	46.8	6.73	34.52	7	0	2.07188e+07	1.80459e+07	2.38946e+07
High	IsMasterProtein	P35658	Nuclear pore complex protein Nup214 OS=Homo sapiens OX=9606 GN=NUP214 PE=1 SV=2	0	FALSE	19.642	2	3	10	3	2090	213.5	7.47	31.3	3	0	1.55402e+07	1.49778e+07	1.42163e+07
High	IsMasterProtein	P43246	DNA mismatch repair protein Msh2 OS=Homo sapiens OX=9606 GN=MSH2 PE=1 SV=1	0	FALSE	19.607	7	4	10	4	934	104.7	5.77	17.96	4	0	4.33017e+06	3.2695e+06	3.75922e+06
High	IsMasterProtein	Q02978	Mitochondrial 2-oxoglutarate/malate carrier protein OS=Homo sapiens OX=9606 GN=SLC25A11 PE=1 SV=3	0	FALSE	19.583	18	5	11	5	314	34	9.91	22.36	5	0	2.15628e+07	2.16874e+07	1.81942e+07
High	IsMasterProtein	Q02790	Peptidyl-prolyl cis-trans isomerase FKBP4 OS=Homo sapiens OX=9606 GN=FKBP4 PE=1 SV=3	0	FALSE	19.581	13	5	10	5	459	51.8	5.43	27.2	5	0	2.66877e+07	2.69887e+07	2.48703e+07
High	IsMasterProtein	Q96BR5	Cytochrome c oxidase assembly factor 7 OS=Homo sapiens OX=9606 GN=COA7 PE=1 SV=2	0	FALSE	19.46	29	4	7	4	231	25.7	6.02	22.23	4	0	1.62931e+07	1.45907e+07	1.63386e+07
High	IsMasterProtein	P62266	40S ribosomal protein S23 OS=Homo sapiens OX=9606 GN=RPS23 PE=1 SV=3	0	FALSE	19.395	43	5	12	5	143	15.8	10.49	39.79	5	0	5.07767e+07	4.49299e+07	4.06084e+07
High	IsMasterProtein	Q9Y295	Developmentally-regulated GTP-binding protein 1 OS=Homo sapiens OX=9606 GN=DRG1 PE=1 SV=1	0	FALSE	19.275	14	3	7	3	367	40.5	8.9	23.41	3	0	7.39502e+06	6.74461e+06	6.13808e+06
High	IsMasterProtein	Q15637	Splicing factor 1 OS=Homo sapiens OX=9606 GN=SF1 PE=1 SV=4	0	FALSE	19.111	6	3	10	3	639	68.3	8.98	31.74	3	0	3.6639e+07	2.9824e+07	17507253
High	IsMasterProtein	Q12906	Interleukin enhancer-binding factor 3 OS=Homo sapiens OX=9606 GN=ILF3 PE=1 SV=3	0	FALSE	19.059	7	5	7	5	894	95.3	8.76	18.66	5	0	1.74732e+07	1.60183e+07	1.66777e+07
High	IsMasterProtein	Q13162	Peroxiredoxin-4 OS=Homo sapiens OX=9606 GN=PRDX4 PE=1 SV=1	0	FALSE	19.047	24	4	7	3	271	30.5	6.29	14.69	4	0	1.04057e+07	1.08477e+07	10484996
High	IsMasterProtein	P20618	Proteasome subunit beta type-1 OS=Homo sapiens OX=9606 GN=PSMB1 PE=1 SV=2	0	FALSE	18.985	22	3	7	3	241	26.5	8.13	27.94	3	0	1.02609e+07	1.02533e+07	9.25989e+06
High	IsMasterProtein	P23381	Tryptophan--tRNA ligase, cytoplasmic OS=Homo sapiens OX=9606 GN=WARS PE=1 SV=2	0	FALSE	18.969	13	5	12	5	471	53.1	6.23	38.92	5	0	3.56468e+07	3.3925e+07	35764619
High	IsMasterProtein	Q14166	Tubulin--tyrosine ligase-like protein 12 OS=Homo sapiens OX=9606 GN=TTLL12 PE=1 SV=2	0	FALSE	18.934	10	3	5	3	644	74.4	5.53	20.12	3	0	9.50834e+06	1.00865e+07	10207446
High	IsMasterProtein	Q9UBX3	Mitochondrial dicarboxylate carrier OS=Homo sapiens OX=9606 GN=SLC25A10 PE=1 SV=2	0	FALSE	18.908	17	3	7	3	287	31.3	9.54	23.55	3	0	7.44609e+06	6.64673e+06	4.75039e+06
High	IsMasterProtein	P52292	Importin subunit alpha-1 OS=Homo sapiens OX=9606 GN=KPNA2 PE=1 SV=1	0	FALSE	18.866	8	2	9	2	529	57.8	5.4	28.15	2	0	5.36038e+06	4.51153e+06	4.63902e+06
High	IsMasterProtein	P35232	Prohibitin OS=Homo sapiens OX=9606 GN=PHB PE=1 SV=1	0	FALSE	18.845	24	5	12	5	272	29.8	5.76	35.26	5	0	2.1055e+07	1.93505e+07	1.79468e+07
High	IsMasterProtein	P21266	Glutathione S-transferase Mu 3 OS=Homo sapiens OX=9606 GN=GSTM3 PE=1 SV=3	0	FALSE	18.809	18	3	9	3	225	26.5	5.54	26.49	3	0	5.40486e+06	5.09685e+06	4.83681e+06
High	IsMasterProtein	Q99615	DnaJ homolog subfamily C member 7 OS=Homo sapiens OX=9606 GN=DNAJC7 PE=1 SV=2	0	FALSE	18.762	7	3	8	3	494	56.4	6.96	29.99	3	0	2.03267e+07	1.94603e+07	22971804
High	IsMasterProtein	Q7Z4W1	L-xylulose reductase OS=Homo sapiens OX=9606 GN=DCXR PE=1 SV=2	0	FALSE	18.75	20	4	7	4	244	25.9	8.1	17.5	4	0	6.89198e+06	7.08888e+06	6.96784e+06
High	IsMasterProtein	P46977	Dolichyl-diphosphooligosaccharide--protein glycosyltransferase subunit STT3A OS=Homo sapiens OX=9606 GN=STT3A PE=1 SV=2	0	FALSE	18.717	9	6	17	5	705	80.5	8.07	29.28	6	0	4.58307e+07	4.68368e+07	4.06162e+07
High	IsMasterProtein	Q16777	Histone H2A type 2-C OS=Homo sapiens OX=9606 GN=HIST2H2AC PE=1 SV=4	0	FALSE	18.692	33	4	19	4	129	14	10.9	59.6	4	0	1.37952e+08	1.44761e+08	146917669
High	IsMasterProtein	Q9NSD9	Phenylalanine--tRNA ligase beta subunit OS=Homo sapiens OX=9606 GN=FARSB PE=1 SV=3	0	FALSE	18.669	9	5	10	5	589	66.1	6.84	24.37	5	0	1.88642e+07	1.72584e+07	1.70769e+07
High	IsMasterProtein	P62244	40S ribosomal protein S15a OS=Homo sapiens OX=9606 GN=RPS15A PE=1 SV=2	0	FALSE	18.592	42	6	19	6	130	14.8	10.13	42.51	6	0	1.6114e+08	1.61532e+08	141929472
High	IsMasterProtein	Q9Y285	Phenylalanine--tRNA ligase alpha subunit OS=Homo sapiens OX=9606 GN=FARSA PE=1 SV=3	0	FALSE	18.311	6	2	6	2	508	57.5	7.8	19.82	2	0	8.59396e+06	6.49985e+06	6.63623e+06
High	IsMasterProtein	Q5QNW6	Histone H2B type 2-F OS=Homo sapiens OX=9606 GN=HIST2H2BF PE=1 SV=3	0	FALSE	18.3	35	4	24	1	126	13.9	10.32	43.49	4	0	1.46162e+07	1.38854e+07	14659963
High	IsMasterProtein	P40227	T-complex protein 1 subunit zeta OS=Homo sapiens OX=9606 GN=CCT6A PE=1 SV=3	0	FALSE	18.28	10	4	7	4	531	58	6.68	21.62	4	0	7.96873e+06	7.02066e+06	7.44835e+06
High	IsMasterProtein	P24539	ATP synthase F(0) complex subunit B1, mitochondrial OS=Homo sapiens OX=9606 GN=ATP5PB PE=1 SV=2	0	FALSE	18.271	20	4	16	4	256	28.9	9.36	38.42	4	0	1.82724e+07	1.91485e+07	1.78563e+07
High	IsMasterProtein	Q9H9B4	Sideroflexin-1 OS=Homo sapiens OX=9606 GN=SFXN1 PE=1 SV=4	0	FALSE	18.267	24	5	12	5	322	35.6	9.07	38.36	5	0	3.08408e+07	2.60651e+07	2.75036e+07
High	IsMasterProtein	Q15185	Prostaglandin E synthase 3 OS=Homo sapiens OX=9606 GN=PTGES3 PE=1 SV=1	0	FALSE	18.225	36	5	9	5	160	18.7	4.54	24.37	5	0	2.37851e+07	3.01788e+07	22879502
High	IsMasterProtein	O15042	U2 snRNP-associated SURP motif-containing protein OS=Homo sapiens OX=9606 GN=U2SURP PE=1 SV=2	0	FALSE	18.192	5	5	9	5	1029	118.2	8.47	23.89	5	0	1.73909e+07	1.65899e+07	1.41492e+07
High	IsMasterProtein	P52907	F-actin-capping protein subunit alpha-1 OS=Homo sapiens OX=9606 GN=CAPZA1 PE=1 SV=3	0	FALSE	18.037	28	5	7	4	286	32.9	5.69	19.02	5	1	2.50377e+07	2.75846e+07	25382154
High	IsMasterProtein	P36578	60S ribosomal protein L4 OS=Homo sapiens OX=9606 GN=RPL4 PE=1 SV=5	0	FALSE	18.009	12	4	10	4	427	47.7	11.06	32.83	4	0	3.63495e+07	3.62808e+07	3.20319e+07
High	IsMasterProtein	Q14677	Clathrin interactor 1 OS=Homo sapiens OX=9606 GN=CLINT1 PE=1 SV=1	0	FALSE	17.997	7	3	8	3	625	68.2	6.42	30.38	3	0	1.93434e+07	1.91007e+07	1.90769e+07
High	IsMasterProtein	Q15008	26S proteasome non-ATPase regulatory subunit 6 OS=Homo sapiens OX=9606 GN=PSMD6 PE=1 SV=1	0	FALSE	17.906	14	5	11	5	389	45.5	5.62	31.76	5	0	1.59868e+07	1.63182e+07	1.73816e+07
High	IsMasterProtein	Q13200	26S proteasome non-ATPase regulatory subunit 2 OS=Homo sapiens OX=9606 GN=PSMD2 PE=1 SV=3	0	FALSE	17.898	4	2	3	2	908	100.1	5.2	5.84	2	0	7.12267e+06	5.63096e+06	3.58613e+06
High	IsMasterProtein	P30050	60S ribosomal protein L12 OS=Homo sapiens OX=9606 GN=RPL12 PE=1 SV=1	0	FALSE	17.85	31	3	8	3	165	17.8	9.42	25.57	3	0	1.07114e+07	1.51012e+07	1.36921e+07
High	IsMasterProtein	P48739	Phosphatidylinositol transfer protein beta isoform OS=Homo sapiens OX=9606 GN=PITPNB PE=1 SV=2	0	FALSE	17.82	24	4	11	4	271	31.5	6.87	33.28	4	0	2.28756e+07	2.22868e+07	2.04183e+07
High	IsMasterProtein	P62913	60S ribosomal protein L11 OS=Homo sapiens OX=9606 GN=RPL11 PE=1 SV=2	0	FALSE	17.692	29	5	15	5	178	20.2	9.6	40.88	5	0	5.59324e+07	5.62802e+07	5.5624e+07
High	IsMasterProtein	P48643	T-complex protein 1 subunit epsilon OS=Homo sapiens OX=9606 GN=CCT5 PE=1 SV=1	0	FALSE	17.606	7	3	9	2	541	59.6	5.66	29.08	3	0	7.23199e+06	7.24052e+06	6679239
High	IsMasterProtein	O43143	Pre-mRNA-splicing factor ATP-dependent RNA helicase DHX15 OS=Homo sapiens OX=9606 GN=DHX15 PE=1 SV=2	0	FALSE	17.557	7	5	13	5	795	90.9	7.46	37.66	5	0	3.05651e+07	3.16121e+07	3.13654e+07
High	IsMasterProtein	Q16778	Histone H2B type 2-E OS=Homo sapiens OX=9606 GN=HIST2H2BE PE=1 SV=3	0	FALSE	17.441	35	4	24	1	126	13.9	10.32	47.71	4	3	3.86379e+08	3.77626e+08	375254317
High	IsMasterProtein	Q13151	Heterogeneous nuclear ribonucleoprotein A0 OS=Homo sapiens OX=9606 GN=HNRNPA0 PE=1 SV=1	0	FALSE	17.42	17	3	7	3	305	30.8	9.29	27.35	3	0	1.62981e+07	1.67476e+07	1.63072e+07
High	IsMasterProtein	P49591	Serine--tRNA ligase, cytoplasmic OS=Homo sapiens OX=9606 GN=SARS PE=1 SV=3	0	FALSE	17.403	13	4	10	4	514	58.7	6.43	32.95	4	0	2.28946e+07	2.14435e+07	2.07628e+07
High	IsMasterProtein	P25205	DNA replication licensing factor MCM3 OS=Homo sapiens OX=9606 GN=MCM3 PE=1 SV=3	0	FALSE	17.395	7	5	10	5	808	90.9	5.77	29.25	5	0	1.26787e+07	1.31851e+07	1.15199e+07
High	IsMasterProtein	Q9Y696	Chloride intracellular channel protein 4 OS=Homo sapiens OX=9606 GN=CLIC4 PE=1 SV=4	0	FALSE	17.331	23	4	9	4	253	28.8	5.59	25.43	4	0	1.16752e+07	1.18401e+07	1.15023e+07
High	IsMasterProtein	P60228	Eukaryotic translation initiation factor 3 subunit E OS=Homo sapiens OX=9606 GN=EIF3E PE=1 SV=1	0	FALSE	17.27	12	5	9	5	445	52.2	6.04	20.66	5	0	1.75711e+07	1.82423e+07	2.23513e+07
High	IsMasterProtein	Q9Y266	Nuclear migration protein nudC OS=Homo sapiens OX=9606 GN=NUDC PE=1 SV=1	0	FALSE	16.899	23	5	7	5	331	38.2	5.38	19.29	5	0	2.00889e+07	1.93114e+07	2.36275e+07
High	IsMasterProtein	P53999	Activated RNA polymerase II transcriptional coactivator p15 OS=Homo sapiens OX=9606 GN=SUB1 PE=1 SV=3	0	FALSE	16.858	39	5	16	5	127	14.4	9.6	51	5	0	1.43409e+08	1.48031e+08	1.46446e+08
High	IsMasterProtein	Q15555	Microtubule-associated protein RP/EB family member 2 OS=Homo sapiens OX=9606 GN=MAPRE2 PE=1 SV=1	0	FALSE	16.857	18	4	4	4	327	37	5.57	10.5	4	0	1.1729e+07	1.2169e+07	1.30335e+07
High	IsMasterProtein	P28074	Proteasome subunit beta type-5 OS=Homo sapiens OX=9606 GN=PSMB5 PE=1 SV=3	0	FALSE	16.824	20	5	10	5	263	28.5	6.92	28.73	5	0	2.53762e+07	2.57713e+07	2.72896e+07
High	IsMasterProtein	O43399	Tumor protein D54 OS=Homo sapiens OX=9606 GN=TPD52L2 PE=1 SV=2	0	FALSE	16.682	19	3	6	3	206	22.2	5.36	20.39	3	0	1.63368e+07	1.556e+07	1.44835e+07
High	IsMasterProtein	Q13347	Eukaryotic translation initiation factor 3 subunit I OS=Homo sapiens OX=9606 GN=EIF3I PE=1 SV=1	0	FALSE	16.666	12	3	7	3	325	36.5	5.64	24.63	3	0	1.17243e+07	1.18945e+07	1.26091e+07
High	IsMasterProtein	Q6P1N0	Coiled-coil and C2 domain-containing protein 1A OS=Homo sapiens OX=9606 GN=CC2D1A PE=1 SV=1	0	FALSE	16.568	5	3	5	3	951	104	8.09	16.84	3	0	8.28762e+06	7.15285e+06	6.17254e+06
High	IsMasterProtein	P13667	Protein disulfide-isomerase A4 OS=Homo sapiens OX=9606 GN=PDIA4 PE=1 SV=2	0	FALSE	16.545	8	5	16	5	645	72.9	5.07	33.3	5	0	4.50361e+07	4.40985e+07	4.72816e+07
High	IsMasterProtein	O15173	Membrane-associated progesterone receptor component 2 OS=Homo sapiens OX=9606 GN=PGRMC2 PE=1 SV=1	0	FALSE	16.524	20	4	15	3	223	23.8	4.88	30.59	4	0	7.94465e+07	7.59721e+07	72754949
High	IsMasterProtein	O75844	CAAX prenyl protease 1 homolog OS=Homo sapiens OX=9606 GN=ZMPSTE24 PE=1 SV=2	0	FALSE	16.52	9	4	7	4	475	54.8	7.49	20.09	4	0	1.27564e+07	1.24588e+07	1.0506e+07
High	IsMasterProtein	P54578	Ubiquitin carboxyl-terminal hydrolase 14 OS=Homo sapiens OX=9606 GN=USP14 PE=1 SV=3	0	FALSE	16.441	10	4	5	4	494	56	5.3	10.73	4	0	1.38075e+07	1.35185e+07	1.25885e+07
High	IsMasterProtein	P53004	Biliverdin reductase A OS=Homo sapiens OX=9606 GN=BLVRA PE=1 SV=2	0	FALSE	16.371	18	4	6	4	296	33.4	6.44	15.82	4	0	7.90068e+06	1.44024e+07	7.48859e+06
High	IsMasterProtein	P34897	Serine hydroxymethyltransferase, mitochondrial OS=Homo sapiens OX=9606 GN=SHMT2 PE=1 SV=3	0	FALSE	16.235	12	6	13	6	504	56	8.53	33.18	6	0	5.81356e+07	5.73799e+07	6.36061e+07
High	IsMasterProtein	Q53GQ0	Very-long-chain 3-oxoacyl-CoA reductase OS=Homo sapiens OX=9606 GN=HSD17B12 PE=1 SV=2	0	FALSE	16.199	14	3	7	3	312	34.3	9.32	27.98	3	0	1.46769e+07	1.38736e+07	1.49133e+07
High	IsMasterProtein	Q9Y679	Ancient ubiquitous protein 1 OS=Homo sapiens OX=9606 GN=AUP1 PE=1 SV=2	0	FALSE	16.052	17	4	9	4	410	45.8	8.65	20.36	4	0	1.96085e+07	1.72829e+07	1.79538e+07
High	IsMasterProtein	Q02878	60S ribosomal protein L6 OS=Homo sapiens OX=9606 GN=RPL6 PE=1 SV=3	0	FALSE	16.009	15	4	9	4	288	32.7	10.58	26.03	4	0	1.96027e+07	1.48305e+07	1.81182e+07
High	IsMasterProtein	Q9H089	Large subunit GTPase 1 homolog OS=Homo sapiens OX=9606 GN=LSG1 PE=1 SV=2	0	FALSE	15.831	10	7	12	7	658	75.2	6.38	22.48	7	0	3.69113e+07	3.56509e+07	26084814
High	IsMasterProtein	Q14157-1	Isoform 2 of Ubiquitin-associated protein 2-like OS=Homo sapiens OX=9606 GN=UBAP2L	0	FALSE	15.771	3	3	9	3	983	103.9	6.98	26.61	3	0	1.63658e+07	1.93818e+07	1.78698e+07
High	IsMasterProtein	Q14152	Eukaryotic translation initiation factor 3 subunit A OS=Homo sapiens OX=9606 GN=EIF3A PE=1 SV=1	0	FALSE	15.769	4	5	11	5	1382	166.5	6.79	25.35	5	0	1.49185e+07	1.47263e+07	15998595
High	IsMasterProtein	P49643	DNA primase large subunit OS=Homo sapiens OX=9606 GN=PRIM2 PE=1 SV=2	0	FALSE	15.675	7	3	6	3	509	58.8	7.91	15.53	3	0	5.38872e+06	5.20461e+06	4.73843e+06
High	IsMasterProtein	P51571	Translocon-associated protein subunit delta OS=Homo sapiens OX=9606 GN=SSR4 PE=1 SV=1	0	FALSE	15.671	24	3	12	3	173	19	6.15	35.29	3	0	2.48123e+07	2.30483e+07	2.50152e+07
High	IsMasterProtein	Q9BXJ9	N-alpha-acetyltransferase 15, NatA auxiliary subunit OS=Homo sapiens OX=9606 GN=NAA15 PE=1 SV=1	0	FALSE	15.67	5	5	11	5	866	101.2	7.42	25.08	5	0	1.80802e+07	2.03435e+07	2.02292e+07
High	IsMasterProtein	P50993	Sodium/potassium-transporting ATPase subunit alpha-2 OS=Homo sapiens OX=9606 GN=ATP1A2 PE=1 SV=1	0	FALSE	15.644	6	5	12	1	1020	112.2	5.66	23	5	0	3.51932e+06	3.00393e+06	3.30097e+06
High	IsMasterProtein	P54136	Arginine--tRNA ligase, cytoplasmic OS=Homo sapiens OX=9606 GN=RARS PE=1 SV=2	0	FALSE	15.572	7	4	7	4	660	75.3	6.68	19.14	4	0	1.47056e+07	1.37549e+07	1.28995e+07
High	IsMasterProtein	Q99623	Prohibitin-2 OS=Homo sapiens OX=9606 GN=PHB2 PE=1 SV=2	0	FALSE	15.507	16	4	8	4	299	33.3	9.83	22	4	0	1.00355e+07	1.05571e+07	9.1348e+06
High	IsMasterProtein	P51149	Ras-related protein Rab-7a OS=Homo sapiens OX=9606 GN=RAB7A PE=1 SV=1	0	FALSE	15.483	22	4	9	4	207	23.5	6.7	27.95	4	0	2.17691e+07	2.39192e+07	2.18887e+07
High	IsMasterProtein	P13929	Beta-enolase OS=Homo sapiens OX=9606 GN=ENO3 PE=1 SV=5	0	FALSE	15.482	13	3	5	1	434	47	7.71	15.49	3	0	9.06293e+06	9.61574e+06	9739315
High	IsMasterProtein	P61077	Ubiquitin-conjugating enzyme E2 D3 OS=Homo sapiens OX=9606 GN=UBE2D3 PE=1 SV=1	0	FALSE	15.442	28	3	12	3	147	16.7	7.8	30.43	3	0	4.604e+07	4.13852e+07	3.99297e+07
High	IsMasterProtein	P78371	T-complex protein 1 subunit beta OS=Homo sapiens OX=9606 GN=CCT2 PE=1 SV=4	0	FALSE	15.218	8	3	6	3	535	57.5	6.46	18.89	3	0	1.37128e+07	1.34516e+07	1.38827e+07
High	IsMasterProtein	P10768	S-formylglutathione hydrolase OS=Homo sapiens OX=9606 GN=ESD PE=1 SV=2	0	FALSE	15.128	24	4	8	4	282	31.4	7.02	20.13	4	0	1.08564e+07	1.01849e+07	1.37052e+07
High	IsMasterProtein	Q8TC12	Retinol dehydrogenase 11 OS=Homo sapiens OX=9606 GN=RDH11 PE=1 SV=2	0	FALSE	15.027	16	4	8	4	318	35.4	8.82	23.34	4	0	1.70686e+07	1.62341e+07	12749244
High	IsMasterProtein	P49588	Alanine--tRNA ligase, cytoplasmic OS=Homo sapiens OX=9606 GN=AARS PE=1 SV=2	0	FALSE	14.978	7	4	6	4	968	106.7	5.53	16.55	4	0	9.25895e+06	7.73701e+06	7.68237e+06
High	IsMasterProtein	Q14318	Peptidyl-prolyl cis-trans isomerase FKBP8 OS=Homo sapiens OX=9606 GN=FKBP8 PE=1 SV=2	0	FALSE	14.852	10	3	10	3	412	44.5	4.84	37.01	3	0	2.35096e+07	2.14836e+07	2.10398e+07
High	IsMasterProtein	P62873	Guanine nucleotide-binding protein G(I)/G(S)/G(T) subunit beta-1 OS=Homo sapiens OX=9606 GN=GNB1 PE=1 SV=3	0	FALSE	14.714	11	3	8	3	340	37.4	6	20.13	3	0	1.38565e+07	1.89484e+07	12950929
High	IsMasterProtein	Q9H0U3	Magnesium transporter protein 1 OS=Homo sapiens OX=9606 GN=MAGT1 PE=1 SV=1	0	FALSE	14.663	10	3	7	3	335	38	9.63	20.82	3	0	1.41356e+07	1.39796e+07	1.56151e+07
High	IsMasterProtein	Q92990	Glomulin OS=Homo sapiens OX=9606 GN=GLMN PE=1 SV=2	0	FALSE	14.576	6	2	2	2	594	68.2	5.33	6.4	2	0	1.35826e+06	1.4797e+06	1.11188e+06
High	IsMasterProtein	P29401	Transketolase OS=Homo sapiens OX=9606 GN=TKT PE=1 SV=3	0	FALSE	14.56	8	3	7	3	623	67.8	7.66	26.2	3	0	1.19686e+07	1.16535e+07	1.01082e+07
High	IsMasterProtein	P27708	CAD protein OS=Homo sapiens OX=9606 GN=CAD PE=1 SV=3	0	FALSE	14.54	2	5	6	5	2225	242.8	6.46	13.59	5	0	1.20979e+07	1.1209e+07	1.18387e+07
High	IsMasterProtein	Q92665	28S ribosomal protein S31, mitochondrial OS=Homo sapiens OX=9606 GN=MRPS31 PE=1 SV=3	0	FALSE	14.505	11	2	4	2	395	45.3	9.29	18.83	2	0	9.78035e+06	8.68628e+06	8136012
High	IsMasterProtein	P35580	Myosin-10 OS=Homo sapiens OX=9606 GN=MYH10 PE=1 SV=3	0	FALSE	14.468	2	5	10	1	1976	228.9	5.54	23.26	5	0	3.70657e+06	3.83711e+06	3480781
High	IsMasterProtein	Q15021	Condensin complex subunit 1 OS=Homo sapiens OX=9606 GN=NCAPD2 PE=1 SV=3	0	FALSE	14.253	4	4	7	4	1401	157.1	6.61	13.39	4	0	3.1549e+06	2.89723e+06	2.7088e+06
High	IsMasterProtein	P18124	60S ribosomal protein L7 OS=Homo sapiens OX=9606 GN=RPL7 PE=1 SV=1	0	FALSE	14.226	24	5	11	5	248	29.2	10.65	24.8	5	0	2.60102e+07	2.36435e+07	20051078
High	IsMasterProtein	P08865	40S ribosomal protein SA OS=Homo sapiens OX=9606 GN=RPSA PE=1 SV=4	0	FALSE	14.201	15	3	7	3	295	32.8	4.87	21.94	3	0	2.11181e+07	2.13558e+07	1.70782e+07
High	IsMasterProtein	P49189	4-trimethylaminobutyraldehyde dehydrogenase OS=Homo sapiens OX=9606 GN=ALDH9A1 PE=1 SV=3	0	FALSE	14.161	10	5	12	5	494	53.8	5.87	21.54	5	0	2.73335e+07	2.41274e+07	26183550
High	IsMasterProtein	O76041-2	Isoform 2 of Nebulette OS=Homo sapiens OX=9606 GN=NEBL	0	FALSE	14.148	16	4	9	4	270	31.2	8.31	16.11	4	0	2.30911e+07	1.99765e+07	2.25622e+07
High	IsMasterProtein	P34932	Heat shock 70 kDa protein 4 OS=Homo sapiens OX=9606 GN=HSPA4 PE=1 SV=4	0	FALSE	14.135	5	3	5	3	840	94.3	5.19	17.33	3	0	9.14686e+06	9.27739e+06	9.08955e+06
High	IsMasterProtein	P25788	Proteasome subunit alpha type-3 OS=Homo sapiens OX=9606 GN=PSMA3 PE=1 SV=2	0	FALSE	14.114	25	5	11	5	255	28.4	5.33	23.85	5	0	5.59904e+07	5.06673e+07	4.84156e+07
High	IsMasterProtein	P61081	NEDD8-conjugating enzyme Ubc12 OS=Homo sapiens OX=9606 GN=UBE2M PE=1 SV=1	0	FALSE	13.954	27	5	15	5	183	20.9	7.69	32.14	5	0	2.5333e+07	2.54416e+07	2.68854e+07
High	IsMasterProtein	Q9BWD1	Acetyl-CoA acetyltransferase, cytosolic OS=Homo sapiens OX=9606 GN=ACAT2 PE=1 SV=2	0	FALSE	13.888	10	3	6	3	397	41.3	6.92	18.01	3	0	1.07446e+07	1.05656e+07	9.75376e+06
High	IsMasterProtein	P27694	Replication protein A 70 kDa DNA-binding subunit OS=Homo sapiens OX=9606 GN=RPA1 PE=1 SV=2	0	FALSE	13.876	9	4	7	4	616	68.1	7.21	17.29	4	0	1.64974e+07	1.65593e+07	1.65821e+07
High	IsMasterProtein	P49257	Protein ERGIC-53 OS=Homo sapiens OX=9606 GN=LMAN1 PE=1 SV=2	0	FALSE	13.845	8	4	9	4	510	57.5	6.77	21.66	4	0	2.00662e+07	2.25155e+07	2.11083e+07
High	IsMasterProtein	Q9NZI8	Insulin-like growth factor 2 mRNA-binding protein 1 OS=Homo sapiens OX=9606 GN=IGF2BP1 PE=1 SV=2	0	FALSE	13.717	8	3	4	3	577	63.4	9.2	13.85	3	0	1.04031e+07	1.00946e+07	9.69901e+06
High	IsMasterProtein	P52565	Rho GDP-dissociation inhibitor 1 OS=Homo sapiens OX=9606 GN=ARHGDIA PE=1 SV=3	0	FALSE	13.652	16	2	2	2	204	23.2	5.11	5.85	2	0	8.54738e+06	9.72878e+06	10022905
High	IsMasterProtein	Q15942	Zyxin OS=Homo sapiens OX=9606 GN=ZYX PE=1 SV=1	0	FALSE	13.622	9	3	4	3	572	61.2	6.67	14.32	3	0	9.1633e+06	8.43327e+06	9.70509e+06
High	IsMasterProtein	Q00325-2	Isoform B of Phosphate carrier protein, mitochondrial OS=Homo sapiens OX=9606 GN=SLC25A3	0	FALSE	13.568	13	3	9	3	361	39.9	9.36	23.44	3	0	1.31105e+07	1.42898e+07	1.20577e+07
High	IsMasterProtein	P47756-2	Isoform 2 of F-actin-capping protein subunit beta OS=Homo sapiens OX=9606 GN=CAPZB	0	FALSE	13.483	14	3	7	3	272	30.6	6	20.93	3	0	1.78595e+07	1.78659e+07	1.7039e+07
High	IsMasterProtein	Q9H583	HEAT repeat-containing protein 1 OS=Homo sapiens OX=9606 GN=HEATR1 PE=1 SV=3	0	FALSE	13.467	2	3	5	3	2144	242.2	6.54	10.24	3	0	2.74245e+06	3.11877e+06	2.5147e+06
High	IsMasterProtein	O14744	Protein arginine N-methyltransferase 5 OS=Homo sapiens OX=9606 GN=PRMT5 PE=1 SV=4	0	FALSE	13.402	8	5	12	5	637	72.6	6.29	27.5	5	0	2.18108e+07	1.95395e+07	1.86519e+07
High	IsMasterProtein	P62851	40S ribosomal protein S25 OS=Homo sapiens OX=9606 GN=RPS25 PE=1 SV=1	0	FALSE	13.341	30	5	16	5	125	13.7	10.11	36.18	5	0	1.14199e+08	1.03735e+08	9.89487e+07
High	IsMasterProtein	P61326	Protein mago nashi homolog OS=Homo sapiens OX=9606 GN=MAGOH PE=1 SV=1	0	FALSE	13.34	26	3	9	3	146	17.2	6.11	29.89	3	0	1.47379e+07	1.40411e+07	1.56974e+07
High	IsMasterProtein	Q9Y490	Talin-1 OS=Homo sapiens OX=9606 GN=TLN1 PE=1 SV=3	0	FALSE	13.304	2	4	6	2	2541	269.6	6.07	14.51	4	2	2.83402e+07	2.12607e+07	2.37177e+07
High	IsMasterProtein	P23921	Ribonucleoside-diphosphate reductase large subunit OS=Homo sapiens OX=9606 GN=RRM1 PE=1 SV=1	0	FALSE	13.213	7	4	8	4	792	90	7.15	24.02	4	0	1.5202e+07	1.69898e+07	14970818
High	IsMasterProtein	P12814	Alpha-actinin-1 OS=Homo sapiens OX=9606 GN=ACTN1 PE=1 SV=2	0	FALSE	13.192	4	3	6	1	892	103	5.41	15.91	3	0	1.34912e+06	1.32165e+06	1.12316e+06
High	IsMasterProtein	Q6PKG0	La-related protein 1 OS=Homo sapiens OX=9606 GN=LARP1 PE=1 SV=2	0	FALSE	13.072	4	4	10	4	1096	123.4	8.82	21.6	4	0	5.86918e+06	6.6922e+06	6.78302e+06
High	IsMasterProtein	Q16629	Serine/arginine-rich splicing factor 7 OS=Homo sapiens OX=9606 GN=SRSF7 PE=1 SV=1	0	FALSE	13.038	13	3	7	2	238	27.4	11.82	22.91	3	0	1.10374e+07	1.13865e+07	13568560
High	IsMasterProtein	Q9Y2L1	Exosome complex exonuclease RRP44 OS=Homo sapiens OX=9606 GN=DIS3 PE=1 SV=2	0	FALSE	12.79	5	4	7	4	958	108.9	7.14	14.09	4	0	1.45066e+07	1.35845e+07	1.33221e+07
High	IsMasterProtein	P55884	Eukaryotic translation initiation factor 3 subunit B OS=Homo sapiens OX=9606 GN=EIF3B PE=1 SV=3	0	FALSE	12.775	4	3	6	3	814	92.4	5	13.64	3	0	1.08084e+07	1.02394e+07	1.21518e+07
High	IsMasterProtein	Q02543	60S ribosomal protein L18a OS=Homo sapiens OX=9606 GN=RPL18A PE=1 SV=2	0	FALSE	12.756	17	3	10	3	176	20.7	10.71	24.34	3	0	3.19008e+07	2.2584e+07	24869083
High	IsMasterProtein	P48444	Coatomer subunit delta OS=Homo sapiens OX=9606 GN=ARCN1 PE=1 SV=1	0	FALSE	12.752	9	4	11	4	511	57.2	6.21	27.59	4	0	2.70757e+07	2.50027e+07	27345164
High	IsMasterProtein	P28288	ATP-binding cassette sub-family D member 3 OS=Homo sapiens OX=9606 GN=ABCD3 PE=1 SV=1	0	FALSE	12.721	7	3	6	3	659	75.4	9.36	15.11	3	0	6.70229e+06	6.79202e+06	6.00989e+06
High	IsMasterProtein	Q9Y2X3	Nucleolar protein 58 OS=Homo sapiens OX=9606 GN=NOP58 PE=1 SV=1	0	FALSE	12.641	10	4	9	4	529	59.5	8.92	23.82	4	0	1.1203e+07	1.03903e+07	9.37053e+06
High	IsMasterProtein	P28340	DNA polymerase delta catalytic subunit OS=Homo sapiens OX=9606 GN=POLD1 PE=1 SV=2	0	FALSE	12.622	3	3	6	3	1107	123.6	7.03	12.69	3	0	3.92664e+07	3.84687e+07	3.57086e+07
High	IsMasterProtein	P15531	Nucleoside diphosphate kinase A OS=Homo sapiens OX=9606 GN=NME1 PE=1 SV=1	0	FALSE	12.571	29	4	12	1	152	17.1	6.19	30.98	4	0	5.09383e+06	4.53143e+06	4.17897e+06
High	IsMasterProtein	Q6NXE6	Armadillo repeat-containing protein 6 OS=Homo sapiens OX=9606 GN=ARMC6 PE=1 SV=2	0	FALSE	12.512	7	3	6	3	501	54.1	6.24	12.98	3	0	9.89058e+06	1.01139e+07	1.06431e+07
High	IsMasterProtein	Q9NRN7	L-aminoadipate-semialdehyde dehydrogenase-phosphopantetheinyl transferase OS=Homo sapiens OX=9606 GN=AASDHPPT PE=1 SV=2	0	FALSE	12.51	7	2	5	2	309	35.8	6.8	14.38	2	0	2.4041e+07	2.12361e+07	2.38924e+07
High	IsMasterProtein	Q9H2U2	Inorganic pyrophosphatase 2, mitochondrial OS=Homo sapiens OX=9606 GN=PPA2 PE=1 SV=2	0	FALSE	12.456	9	2	4	2	334	37.9	7.39	12.46	2	0	4.47046e+06	4.70249e+06	4.17003e+06
High	IsMasterProtein	Q9H9A6	Leucine-rich repeat-containing protein 40 OS=Homo sapiens OX=9606 GN=LRRC40 PE=1 SV=1	0	FALSE	12.45	5	2	4	2	602	68.2	6.43	16.67	2	0	3.33728e+06	5.77215e+06	3.23277e+06
High	IsMasterProtein	P46781	40S ribosomal protein S9 OS=Homo sapiens OX=9606 GN=RPS9 PE=1 SV=3	0	FALSE	12.406	20	5	11	5	194	22.6	10.65	24.12	5	0	3.32409e+07	3.38135e+07	3.22915e+07
High	IsMasterProtein	P52294	Importin subunit alpha-5 OS=Homo sapiens OX=9606 GN=KPNA1 PE=1 SV=3	0	FALSE	12.396	8	4	6	4	538	60.2	5.01	12.77	4	0	1.43823e+07	1.40708e+07	1.38043e+07
High	IsMasterProtein	Q9UBM7	7-dehydrocholesterol reductase OS=Homo sapiens OX=9606 GN=DHCR7 PE=1 SV=1	0	FALSE	12.311	8	4	6	4	475	54.5	8.7	15.84	4	0	4.06351e+07	3.97024e+07	3.79012e+07
High	IsMasterProtein	P30048	Thioredoxin-dependent peroxide reductase, mitochondrial OS=Homo sapiens OX=9606 GN=PRDX3 PE=1 SV=3	0	FALSE	12.127	13	3	7	3	256	27.7	7.78	12.26	3	0	1.69271e+07	1.76182e+07	16338748
High	IsMasterProtein	Q66PJ3	ADP-ribosylation factor-like protein 6-interacting protein 4 OS=Homo sapiens OX=9606 GN=ARL6IP4 PE=1 SV=2	0	FALSE	12.09	7	2	6	2	421	44.9	10.93	23.9	2	0	7.5671e+06	9.84395e+06	13759748
High	IsMasterProtein	P11766	Alcohol dehydrogenase class-3 OS=Homo sapiens OX=9606 GN=ADH5 PE=1 SV=4	0	FALSE	12.047	13	3	5	3	374	39.7	7.49	12.98	3	0	1.17197e+07	1.65274e+07	1.42657e+07
High	IsMasterProtein	P50454	Serpin H1 OS=Homo sapiens OX=9606 GN=SERPINH1 PE=1 SV=2	0	FALSE	12.022	9	2	4	2	418	46.4	8.69	12.6	2	0	3.96988e+06	3.25574e+06	2.36479e+06
High	IsMasterProtein	Q05519	Serine/arginine-rich splicing factor 11 OS=Homo sapiens OX=9606 GN=SRSF11 PE=1 SV=1	0	FALSE	12.009	10	3	5	3	484	53.5	10.52	8.57	3	0	1.12726e+07	1.24297e+07	1.30587e+07
High	IsMasterProtein	P15170	Eukaryotic peptide chain release factor GTP-binding subunit ERF3A OS=Homo sapiens OX=9606 GN=GSPT1 PE=1 SV=1	0	FALSE	11.99	11	4	6	4	499	55.7	5.62	8.99	4	0	1.14281e+07	1.31608e+07	1.11733e+07
High	IsMasterProtein	Q9HAV4	Exportin-5 OS=Homo sapiens OX=9606 GN=XPO5 PE=1 SV=1	0	FALSE	11.978	2	2	5	2	1204	136.2	5.8	15.26	2	0	3.89952e+06	3.7883e+06	3.78769e+06
High	IsMasterProtein	P00558	Phosphoglycerate kinase 1 OS=Homo sapiens OX=9606 GN=PGK1 PE=1 SV=3	0	FALSE	11.932	8	2	5	2	417	44.6	8.1	12	2	0	1.93985e+07	1.86245e+07	1.91333e+07
High	IsMasterProtein	P13674	Prolyl 4-hydroxylase subunit alpha-1 OS=Homo sapiens OX=9606 GN=P4HA1 PE=1 SV=2	0	FALSE	11.916	8	3	6	3	534	61	6.01	16.03	3	0	8.33974e+06	8.55118e+06	7504528
High	IsMasterProtein	P54886	Delta-1-pyrroline-5-carboxylate synthase OS=Homo sapiens OX=9606 GN=ALDH18A1 PE=1 SV=2	0	FALSE	11.895	7	4	9	4	795	87.2	7.12	20.66	4	0	1.01878e+07	9.84362e+06	7.29835e+06
High	IsMasterProtein	Q9H7C9	Mth938 domain-containing protein OS=Homo sapiens OX=9606 GN=AAMDC PE=1 SV=1	0	FALSE	11.857	38	4	13	4	122	13.3	8.46	32.3	4	0	3.56151e+07	3.02629e+07	30909429
High	IsMasterProtein	P60953	Cell division control protein 42 homolog OS=Homo sapiens OX=9606 GN=CDC42 PE=1 SV=2	0	FALSE	11.805	14	2	7	2	191	21.2	6.55	18.02	2	0	1.24978e+07	1.28436e+07	1.16491e+07
High	IsMasterProtein	O15067	Phosphoribosylformylglycinamidine synthase OS=Homo sapiens OX=9606 GN=PFAS PE=1 SV=4	0	FALSE	11.685	3	3	4	3	1338	144.6	5.76	9.7	3	0	8.44289e+06	6.75884e+06	5.59514e+06
High	IsMasterProtein	Q9UNZ2	NSFL1 cofactor p47 OS=Homo sapiens OX=9606 GN=NSFL1C PE=1 SV=2	0	FALSE	11.605	8	2	6	2	370	40.5	5.1	25.88	2	0	6.75941e+06	7.09939e+06	6.72355e+06
High	IsMasterProtein	Q13620-1	Isoform 2 of Cullin-4B OS=Homo sapiens OX=9606 GN=CUL4B	0	FALSE	11.587	4	3	8	3	895	102.2	7.94	21.89	3	0	1.21066e+07	9.02601e+06	9.83939e+06
High	IsMasterProtein	Q6PI48	Aspartate--tRNA ligase, mitochondrial OS=Homo sapiens OX=9606 GN=DARS2 PE=1 SV=1	0	FALSE	11.577	6	3	4	3	645	73.5	8.02	9.92	3	0	7.54284e+06	8.76321e+06	7.49617e+06
High	IsMasterProtein	P12270	Nucleoprotein TPR OS=Homo sapiens OX=9606 GN=TPR PE=1 SV=3	0	FALSE	11.538	1	2	4	2	2363	267.1	5.02	11.19	2	0	8.85439e+06	8.6557e+06	5.23835e+06
High	IsMasterProtein	Q15046	Lysine--tRNA ligase OS=Homo sapiens OX=9606 GN=KARS1 PE=1 SV=3	0	FALSE	11.537	6	3	7	3	597	68	6.35	21.86	3	0	1.06975e+07	1.20251e+07	8647492
High	IsMasterProtein	O60256	Phosphoribosyl pyrophosphate synthase-associated protein 2 OS=Homo sapiens OX=9606 GN=PRPSAP2 PE=1 SV=1	0	FALSE	11.505	10	3	6	3	369	40.9	7.44	17.46	3	0	1.00544e+07	9.98664e+06	5711918
High	IsMasterProtein	Q15084	Protein disulfide-isomerase A6 OS=Homo sapiens OX=9606 GN=PDIA6 PE=1 SV=1	0	FALSE	11.469	9	2	4	2	440	48.1	5.08	13.25	2	0	6.21325e+06	6.29574e+06	5.55682e+06
High	IsMasterProtein	P17174	Aspartate aminotransferase, cytoplasmic OS=Homo sapiens OX=9606 GN=GOT1 PE=1 SV=3	0	FALSE	11.432	8	2	4	2	413	46.2	7.01	11.35	2	0	7.10867e+06	4.13076e+06	5905530
High	IsMasterProtein	O00165	HCLS1-associated protein X-1 OS=Homo sapiens OX=9606 GN=HAX1 PE=1 SV=2	0	FALSE	11.42	16	3	4	3	279	31.6	4.92	11.36	3	0	6.26918e+06	3.67514e+06	6.02939e+06
High	IsMasterProtein	Q7Z6Z7	E3 ubiquitin-protein ligase HUWE1 OS=Homo sapiens OX=9606 GN=HUWE1 PE=1 SV=3	0	FALSE	11.393	1	3	6	3	4374	481.6	5.22	15.45	3	0	2.44492e+06	2.42069e+06	2.42739e+06
High	IsMasterProtein	Q13724	Mannosyl-oligosaccharide glucosidase OS=Homo sapiens OX=9606 GN=MOGS PE=1 SV=5	0	FALSE	11.354	4	2	3	2	837	91.9	8.9	9.85	2	0	4.98524e+06	5.27554e+06	5.134e+06
High	IsMasterProtein	P62854	40S ribosomal protein S26 OS=Homo sapiens OX=9606 GN=RPS26 PE=1 SV=3	0	FALSE	11.327	29	3	9	3	115	13	11	21.55	3	0	3.53442e+07	3.12566e+07	3.49985e+07
High	IsMasterProtein	Q9Y265	RuvB-like 1 OS=Homo sapiens OX=9606 GN=RUVBL1 PE=1 SV=1	0	FALSE	11.295	8	3	9	3	456	50.2	6.42	16.86	3	0	2.13523e+07	2.12296e+07	16993040
High	IsMasterProtein	O60493	Sorting nexin-3 OS=Homo sapiens OX=9606 GN=SNX3 PE=1 SV=3	0	FALSE	11.291	26	5	9	5	162	18.8	8.66	18.15	5	0	2.38419e+07	1.80467e+07	24391527
High	IsMasterProtein	Q8WW12	PEST proteolytic signal-containing nuclear protein OS=Homo sapiens OX=9606 GN=PCNP PE=1 SV=2	0	FALSE	11.203	16	2	4	2	178	18.9	7.49	14.91	2	0	1.40239e+07	1.21603e+07	1.26026e+07
High	IsMasterProtein	Q8NCW5	NAD(P)H-hydrate epimerase OS=Homo sapiens OX=9606 GN=NAXE PE=1 SV=2	0	FALSE	11.152	14	3	6	3	288	31.7	7.66	14.14	3	0	2.01984e+07	1.78608e+07	2.12965e+07
High	IsMasterProtein	P61221	ATP-binding cassette sub-family E member 1 OS=Homo sapiens OX=9606 GN=ABCE1 PE=1 SV=1	0	FALSE	11.09	3	2	5	2	599	67.3	8.34	14.05	2	0	1.17373e+07	1.10449e+07	1.26315e+07
High	IsMasterProtein	P61513	60S ribosomal protein L37a OS=Homo sapiens OX=9606 GN=RPL37A PE=1 SV=2	0	FALSE	11.058	45	4	8	4	92	10.3	10.43	11.27	4	0	1.19423e+07	1.01895e+07	9.52082e+06
High	IsMasterProtein	Q12972	Nuclear inhibitor of protein phosphatase 1 OS=Homo sapiens OX=9606 GN=PPP1R8 PE=1 SV=2	0	FALSE	11.004	12	2	3	2	351	38.5	7.37	7.66	2	0	4.85862e+06	1.87486e+06	1.952e+06
High	IsMasterProtein	Q8WUM4	Programmed cell death 6-interacting protein OS=Homo sapiens OX=9606 GN=PDCD6IP PE=1 SV=1	0	FALSE	10.963	5	3	6	3	868	96	6.52	14.2	3	0	7.13189e+06	6.68566e+06	5.98803e+06
High	IsMasterProtein	Q9BTX1	Nucleoporin NDC1 OS=Homo sapiens OX=9606 GN=NDC1 PE=1 SV=2	0	FALSE	10.933	5	2	6	2	674	76.3	9.09	23.93	2	0	1.35075e+07	1.2949e+07	12831400
High	IsMasterProtein	P62249	40S ribosomal protein S16 OS=Homo sapiens OX=9606 GN=RPS16 PE=1 SV=2	0	FALSE	10.919	25	4	12	4	146	16.4	10.21	28.89	4	0	3.65091e+07	3.77696e+07	3.21692e+07
High	IsMasterProtein	Q8N766	ER membrane protein complex subunit 1 OS=Homo sapiens OX=9606 GN=EMC1 PE=1 SV=1	0	FALSE	10.892	3	2	5	2	993	111.7	7.66	14.03	2	0	2.24228e+06	2.14634e+06	1.74509e+06
High	IsMasterProtein	Q9BY44	Eukaryotic translation initiation factor 2A OS=Homo sapiens OX=9606 GN=EIF2A PE=1 SV=3	0	FALSE	10.871	7	3	6	3	585	64.9	8.87	14.68	3	0	3.96438e+07	4.22707e+07	4.40731e+07
High	IsMasterProtein	P04637	Cellular tumor antigen p53 OS=Homo sapiens OX=9606 GN=TP53 PE=1 SV=4	0	FALSE	10.834	8	2	4	2	393	43.6	6.79	19.81	2	0	8.48068e+06	8.73715e+06	1.08422e+07
High	IsMasterProtein	O75915	PRA1 family protein 3 OS=Homo sapiens OX=9606 GN=ARL6IP5 PE=1 SV=1	0	FALSE	10.8	16	2	4	2	188	21.6	9.77	11.37	2	0	1.18394e+07	1.16716e+07	1.10206e+07
High	IsMasterProtein	P62330	ADP-ribosylation factor 6 OS=Homo sapiens OX=9606 GN=ARF6 PE=1 SV=2	0	FALSE	10.792	17	2	4	2	175	20.1	8.95	13.05	2	0	6.34938e+06	7.75061e+06	6941454
High	IsMasterProtein	Q9NPA0	ER membrane protein complex subunit 7 OS=Homo sapiens OX=9606 GN=EMC7 PE=1 SV=1	0	FALSE	10.765	12	2	5	2	242	26.5	9.25	18.26	2	0	9.37005e+06	8.44158e+06	8.00093e+06
High	IsMasterProtein	O95394	Phosphoacetylglucosamine mutase OS=Homo sapiens OX=9606 GN=PGM3 PE=1 SV=1	0	FALSE	10.74	7	3	7	3	542	59.8	6.25	15.82	3	0	2.64505e+07	2.37575e+07	1.10694e+07
High	IsMasterProtein	P00492	Hypoxanthine-guanine phosphoribosyltransferase OS=Homo sapiens OX=9606 GN=HPRT1 PE=1 SV=2	0	FALSE	10.729	14	3	7	3	218	24.6	6.68	16.16	3	0	1.92178e+07	1.83774e+07	1.43845e+07
High	IsMasterProtein	P31153	S-adenosylmethionine synthase isoform type-2 OS=Homo sapiens OX=9606 GN=MAT2A PE=1 SV=1	0	FALSE	10.702	8	2	3	2	395	43.6	6.48	10.43	2	0	1.11278e+07	9.7949e+06	1.03145e+07
High	IsMasterProtein	P62280	40S ribosomal protein S11 OS=Homo sapiens OX=9606 GN=RPS11 PE=1 SV=3	0	FALSE	10.697	22	3	6	3	158	18.4	10.3	19.67	3	0	2.6757e+07	2.49256e+07	2.36661e+07
High	IsMasterProtein	Q9NYU2	UDP-glucose:glycoprotein glucosyltransferase 1 OS=Homo sapiens OX=9606 GN=UGGT1 PE=1 SV=3	0	FALSE	10.581	3	3	7	3	1555	177.1	5.63	12.65	3	0	7.97343e+06	5.7274e+06	5.49924e+06
High	IsMasterProtein	O43242	26S proteasome non-ATPase regulatory subunit 3 OS=Homo sapiens OX=9606 GN=PSMD3 PE=1 SV=2	0	FALSE	10.526	6	3	6	3	534	60.9	8.44	18	3	0	1.08571e+07	9.99423e+06	1.00835e+07
High	IsMasterProtein	P11940	Polyadenylate-binding protein 1 OS=Homo sapiens OX=9606 GN=PABPC1 PE=1 SV=2	0	FALSE	10.495	6	3	4	3	636	70.6	9.5	11.49	3	0	1.20928e+07	1.26298e+07	1.3151e+07
High	IsMasterProtein	Q96FJ2	Dynein light chain 2, cytoplasmic OS=Homo sapiens OX=9606 GN=DYNLL2 PE=1 SV=1	0	FALSE	10.447	26	2	7	2	89	10.3	7.37	19.49	2	0	2.2542e+07	2.11199e+07	21542570
High	IsMasterProtein	P62491	Ras-related protein Rab-11A OS=Homo sapiens OX=9606 GN=RAB11A PE=1 SV=3	0	FALSE	10.436	16	3	8	3	216	24.4	6.57	22.67	3	0	1.59464e+07	1.57124e+07	1.61072e+07
High	IsMasterProtein	O00429	Dynamin-1-like protein OS=Homo sapiens OX=9606 GN=DNM1L PE=1 SV=2	0	FALSE	10.378	6	3	4	3	736	81.8	6.81	7.13	3	0	4.4076e+06	3.84782e+06	4.13875e+06
High	IsMasterProtein	P59998	Actin-related protein 2/3 complex subunit 4 OS=Homo sapiens OX=9606 GN=ARPC4 PE=1 SV=3	0	FALSE	10.375	21	4	10	4	168	19.7	8.43	22.36	4	0	2.89674e+07	3.05838e+07	25554113
High	IsMasterProtein	O43432	Eukaryotic translation initiation factor 4 gamma 3 OS=Homo sapiens OX=9606 GN=EIF4G3 PE=1 SV=2	0	FALSE	10.281	2	3	5	2	1585	176.5	5.38	3.44	3	0	1.60923e+06	1.35245e+06	1.02472e+06
High	IsMasterProtein	P62277	40S ribosomal protein S13 OS=Homo sapiens OX=9606 GN=RPS13 PE=1 SV=2	0	FALSE	10.26	18	2	6	2	151	17.2	10.54	17.01	2	0	1.05814e+07	9.39714e+06	8.73988e+06
High	IsMasterProtein	O75390	Citrate synthase, mitochondrial OS=Homo sapiens OX=9606 GN=CS PE=1 SV=2	0	FALSE	10.255	7	3	7	3	466	51.7	8.32	17.6	3	0	1.34597e+07	1.36439e+07	12075608
High	IsMasterProtein	P60900	Proteasome subunit alpha type-6 OS=Homo sapiens OX=9606 GN=PSMA6 PE=1 SV=1	0	FALSE	10.178	14	3	4	3	246	27.4	6.76	8.57	3	0	5.86191e+06	6.3007e+06	5617677
High	IsMasterProtein	Q9BVC6	Transmembrane protein 109 OS=Homo sapiens OX=9606 GN=TMEM109 PE=1 SV=1	0	FALSE	10.128	9	3	7	3	243	26.2	10.48	19.74	3	0	2.38607e+07	2.33501e+07	22545367
High	IsMasterProtein	Q9BZF1	Oxysterol-binding protein-related protein 8 OS=Homo sapiens OX=9606 GN=OSBPL8 PE=1 SV=3	0	FALSE	10.038	4	3	5	3	889	101.1	6.96	12.27	3	0	1.13723e+07	1.30584e+07	5102513
High	IsMasterProtein	Q5VYK3	Proteasome adapter and scaffold protein ECM29 OS=Homo sapiens OX=9606 GN=ECPAS PE=1 SV=2	0	FALSE	9.976	1	2	3	2	1845	204.2	7.12	7.99	2	0	1.53895e+06	1.06498e+06	1.15253e+06
High	IsMasterProtein	Q8WUD1	Ras-related protein Rab-2B OS=Homo sapiens OX=9606 GN=RAB2B PE=1 SV=1	0	FALSE	9.957	13	2	4	2	216	24.2	7.83	12.49	2	0	6.65347e+06	7.561e+06	6.04498e+06
High	IsMasterProtein	Q96HE7	ERO1-like protein alpha OS=Homo sapiens OX=9606 GN=ERO1A PE=1 SV=2	0	FALSE	9.956	9	3	4	3	468	54.4	5.68	8.96	3	0	5.96116e+06	5.06116e+06	5.43496e+06
High	IsMasterProtein	Q14257	Reticulocalbin-2 OS=Homo sapiens OX=9606 GN=RCN2 PE=1 SV=1	0	FALSE	9.92	11	2	3	2	317	36.9	4.4	9.23	2	0	4.20203e+06	4.32175e+06	4823663
High	IsMasterProtein	P0DN79	Cystathionine beta-synthase-like protein OS=Homo sapiens OX=9606 GN=CBSL PE=1 SV=1	0	FALSE	9.897	6	3	7	3	551	60.5	6.65	13.63	3	0	2.05864e+07	1.95279e+07	1.99964e+07
High	IsMasterProtein	Q8IZP2	Putative protein FAM10A4 OS=Homo sapiens OX=9606 GN=ST13P4 PE=5 SV=1	0	FALSE	9.87	13	2	5	2	240	27.4	5.08	13.39	2	0	6.80856e+06	7.00081e+06	5.90526e+06
High	IsMasterProtein	P49755	Transmembrane emp24 domain-containing protein 10 OS=Homo sapiens OX=9606 GN=TMED10 PE=1 SV=2	0	FALSE	9.862	10	2	7	2	219	25	7.44	20.62	2	0	2.71965e+07	2.66255e+07	2.67517e+07
High	IsMasterProtein	O14980	Exportin-1 OS=Homo sapiens OX=9606 GN=XPO1 PE=1 SV=1	0	FALSE	9.826	4	3	6	3	1071	123.3	6.06	17.66	3	0	1.02805e+07	1.0221e+07	9.11606e+06
High	IsMasterProtein	Q8NBU5	ATPase family AAA domain-containing protein 1 OS=Homo sapiens OX=9606 GN=ATAD1 PE=1 SV=1	0	FALSE	9.807	8	2	4	2	361	40.7	6.9	11.4	2	0	5.18008e+06	5.06599e+06	944066
High	IsMasterProtein	Q12788	Transducin beta-like protein 3 OS=Homo sapiens OX=9606 GN=TBL3 PE=1 SV=2	0	FALSE	9.791	5	4	6	4	808	89	6.9	14.17	4	0	6.46639e+06	5.9617e+06	7.88713e+06
High	IsMasterProtein	P62820	Ras-related protein Rab-1A OS=Homo sapiens OX=9606 GN=RAB1A PE=1 SV=3	0	FALSE	9.774	13	2	4	1	205	22.7	6.21	12.27	2	0	4.83137e+06	4.56924e+06	4481249
High	IsMasterProtein	O14641	Segment polarity protein dishevelled homolog DVL-2 OS=Homo sapiens OX=9606 GN=DVL2 PE=1 SV=1	0	FALSE	9.658	4	3	9	3	736	78.9	6.02	18.07	3	0	1.45425e+07	1.54479e+07	1.41672e+07
High	IsMasterProtein	P08240	Signal recognition particle receptor subunit alpha OS=Homo sapiens OX=9606 GN=SRPRA PE=1 SV=2	0	FALSE	9.6	5	2	5	2	638	69.8	8.95	16.77	2	0	1.18654e+07	9.19148e+06	1.07703e+07
High	IsMasterProtein	O00151	PDZ and LIM domain protein 1 OS=Homo sapiens OX=9606 GN=PDLIM1 PE=1 SV=4	0	FALSE	9.595	9	2	6	2	329	36	7.02	16.6	2	0	5.93467e+06	5.86424e+06	5.48125e+06
High	IsMasterProtein	P08134	Rho-related GTP-binding protein RhoC OS=Homo sapiens OX=9606 GN=RHOC PE=1 SV=1	0	FALSE	9.576	17	3	8	3	193	22	6.58	23.17	3	0	1.61651e+07	1.51547e+07	1.40385e+07
High	IsMasterProtein	Q07955	Serine/arginine-rich splicing factor 1 OS=Homo sapiens OX=9606 GN=SRSF1 PE=1 SV=2	0	FALSE	9.517	17	3	6	3	248	27.7	10.36	17.46	3	0	1.88673e+07	1.94218e+07	18082180
High	IsMasterProtein	P31040	Succinate dehydrogenase [ubiquinone] flavoprotein subunit, mitochondrial OS=Homo sapiens OX=9606 GN=SDHA PE=1 SV=2	0	FALSE	9.434	4	2	2	2	664	72.6	7.39	6.15	2	0	6.15072e+06	5.22602e+06	6.53369e+06
High	IsMasterProtein	Q9UNH7	Sorting nexin-6 OS=Homo sapiens OX=9606 GN=SNX6 PE=1 SV=1	0	FALSE	9.4	7	2	3	2	406	46.6	6.16	9.22	2	0	6.7052e+06	6.47177e+06	6.56883e+06
High	IsMasterProtein	O75131	Copine-3 OS=Homo sapiens OX=9606 GN=CPNE3 PE=1 SV=1	0	FALSE	9.387	6	2	4	2	537	60.1	5.85	9.95	2	0	3.80084e+06	3.68047e+06	3752024
High	IsMasterProtein	Q96EB1	Elongator complex protein 4 OS=Homo sapiens OX=9606 GN=ELP4 PE=1 SV=2	0	FALSE	9.378	9	3	5	3	424	46.6	8.51	11.96	3	0	6.27428e+06	6.28761e+06	6.37332e+06
High	IsMasterProtein	P62304	Small nuclear ribonucleoprotein E OS=Homo sapiens OX=9606 GN=SNRPE PE=1 SV=1	0	FALSE	9.345	39	2	3	2	92	10.8	9.44	7.61	2	0	3.56385e+06	3.25339e+06	3.33916e+06
High	IsMasterProtein	Q13263	Transcription intermediary factor 1-beta OS=Homo sapiens OX=9606 GN=TRIM28 PE=1 SV=5	0	FALSE	9.3	4	4	12	4	835	88.5	5.77	20.76	4	0	1.36608e+07	2.07778e+07	12192435
High	IsMasterProtein	P25787	Proteasome subunit alpha type-2 OS=Homo sapiens OX=9606 GN=PSMA2 PE=1 SV=2	0	FALSE	9.293	18	2	2	2	234	25.9	7.43	6.48	2	0	4.87646e+06	4.29112e+06	3.49155e+06
High	IsMasterProtein	O60762	Dolichol-phosphate mannosyltransferase subunit 1 OS=Homo sapiens OX=9606 GN=DPM1 PE=1 SV=1	0	FALSE	9.282	13	2	5	2	260	29.6	9.57	16.96	2	0	6.75374e+06	5.90714e+06	5550097
High	IsMasterProtein	Q96HY6	DDRGK domain-containing protein 1 OS=Homo sapiens OX=9606 GN=DDRGK1 PE=1 SV=2	0	FALSE	9.27	11	2	4	2	314	35.6	5.12	11.84	2	0	1.82681e+06	1.24783e+06	1.19411e+06
High	IsMasterProtein	Q15645	Pachytene checkpoint protein 2 homolog OS=Homo sapiens OX=9606 GN=TRIP13 PE=1 SV=2	0	FALSE	9.255	8	2	3	2	432	48.5	6.09	6.03	2	0	2.88146e+06	2.0197e+06	2.76277e+06
High	IsMasterProtein	Q9NTJ5	Phosphatidylinositide phosphatase SAC1 OS=Homo sapiens OX=9606 GN=SACM1L PE=1 SV=2	0	FALSE	8.923	5	3	5	3	587	66.9	7.12	13.16	3	0	1.54391e+07	1.36289e+07	1.38711e+07
High	IsMasterProtein	Q5SW79	Centrosomal protein of 170 kDa OS=Homo sapiens OX=9606 GN=CEP170 PE=1 SV=1	0	FALSE	8.918	2	2	4	2	1584	175.2	7.11	11.28	2	0	4.65058e+06	4.63978e+06	4.06327e+06
High	IsMasterProtein	Q15286	Ras-related protein Rab-35 OS=Homo sapiens OX=9606 GN=RAB35 PE=1 SV=1	0	FALSE	8.89	11	2	4	1	201	23	8.29	10.65	2	1	3.53161e+07	3.6393e+07	31394323
High	IsMasterProtein	Q9NZZ3	Charged multivesicular body protein 5 OS=Homo sapiens OX=9606 GN=CHMP5 PE=1 SV=1	0	FALSE	8.869	11	2	8	2	219	24.6	4.83	16.94	2	0	2.93931e+07	3.20902e+07	34458979
High	IsMasterProtein	O60841	Eukaryotic translation initiation factor 5B OS=Homo sapiens OX=9606 GN=EIF5B PE=1 SV=4	0	FALSE	8.868	2	2	4	2	1220	138.7	5.49	11.17	2	0	5.6197e+06	5.03306e+06	5.68931e+06
High	IsMasterProtein	Q86UE4	Protein LYRIC OS=Homo sapiens OX=9606 GN=MTDH PE=1 SV=2	0	FALSE	8.861	7	3	4	3	582	63.8	9.32	12.43	3	0	8.95157e+06	9.0058e+06	9323957
High	IsMasterProtein	Q15293	Reticulocalbin-1 OS=Homo sapiens OX=9606 GN=RCN1 PE=1 SV=1	0	FALSE	8.715	9	2	2	2	331	38.9	5	4.71	2	0	2.35943e+06	2.0773e+06	4025174
High	IsMasterProtein	P61289	Proteasome activator complex subunit 3 OS=Homo sapiens OX=9606 GN=PSME3 PE=1 SV=1	0	FALSE	8.713	9	2	3	2	254	29.5	5.95	7.72	2	0	2.01673e+06	4.35887e+06	1.65995e+06
High	IsMasterProtein	P55196	Afadin OS=Homo sapiens OX=9606 GN=AFDN PE=1 SV=3	0	FALSE	8.706	2	3	4	3	1824	206.7	6.47	9.67	3	0	1.12201e+07	1.02854e+07	6507561
High	IsMasterProtein	P61224	Ras-related protein Rap-1b OS=Homo sapiens OX=9606 GN=RAP1B PE=1 SV=1	0	FALSE	8.673	13	2	5	2	184	20.8	5.78	11.54	2	0	6.72365e+06	6.70261e+06	6.90651e+06
High	IsMasterProtein	P40429	60S ribosomal protein L13a OS=Homo sapiens OX=9606 GN=RPL13A PE=1 SV=2	0	FALSE	8.599	16	4	9	4	203	23.6	10.93	20.48	4	0	2.82236e+07	2.52774e+07	2.41685e+07
High	IsMasterProtein	P55209	Nucleosome assembly protein 1-like 1 OS=Homo sapiens OX=9606 GN=NAP1L1 PE=1 SV=1	0	FALSE	8.592	6	2	6	1	391	45.3	4.46	14.24	2	1	9.30307e+06	9.22135e+06	9.66282e+06
High	IsMasterProtein	P17612	cAMP-dependent protein kinase catalytic subunit alpha OS=Homo sapiens OX=9606 GN=PRKACA PE=1 SV=2	0	FALSE	8.576	8	2	3	2	351	40.6	8.79	4.37	2	0	7.52775e+06	6.66603e+06	7.15945e+06
High	IsMasterProtein	Q15181	Inorganic pyrophosphatase OS=Homo sapiens OX=9606 GN=PPA1 PE=1 SV=2	0	FALSE	8.555	10	2	2	2	289	32.6	5.86	3.99	2	0	2.7891e+06	4.26582e+06	3.50516e+06
High	IsMasterProtein	Q92973	Transportin-1 OS=Homo sapiens OX=9606 GN=TNPO1 PE=1 SV=2	0	FALSE	8.55	3	3	6	3	898	102.3	4.98	9.81	3	0	1.34334e+07	1.20292e+07	1.06163e+07
High	IsMasterProtein	P06748	Nucleophosmin OS=Homo sapiens OX=9606 GN=NPM1 PE=1 SV=2	0	FALSE	8.491	10	3	5	3	294	32.6	4.78	11.35	3	0	4.48653e+07	4.27065e+07	4.48971e+07
High	IsMasterProtein	Q9H2M9	Rab3 GTPase-activating protein non-catalytic subunit OS=Homo sapiens OX=9606 GN=RAB3GAP2 PE=1 SV=1	0	FALSE	8.478	3	3	6	3	1393	155.9	5.62	14.99	3	0	7.91077e+06	7.43932e+06	6.78189e+06
High	IsMasterProtein	P51991	Heterogeneous nuclear ribonucleoprotein A3 OS=Homo sapiens OX=9606 GN=HNRNPA3 PE=1 SV=2	0	FALSE	8.466	9	2	4	2	378	39.6	9.01	13.1	2	0	7.42532e+06	6.40659e+06	5.61453e+06
High	IsMasterProtein	P61106	Ras-related protein Rab-14 OS=Homo sapiens OX=9606 GN=RAB14 PE=1 SV=4	0	FALSE	8.465	12	2	2	1	215	23.9	6.21	5.34	2	0	3.32216e+06	3.92431e+06	4547840
High	IsMasterProtein	Q9Y6M1	Insulin-like growth factor 2 mRNA-binding protein 2 OS=Homo sapiens OX=9606 GN=IGF2BP2 PE=1 SV=2	0	FALSE	8.396	4	2	7	1	599	66.1	8.46	20.54	2	0	2.79461e+06		2.70513e+06
High	IsMasterProtein	Q9UHD1	Cysteine and histidine-rich domain-containing protein 1 OS=Homo sapiens OX=9606 GN=CHORDC1 PE=1 SV=2	0	FALSE	8.38	7	2	3	2	332	37.5	7.87	8.96	2	0	5.17433e+06	5.35495e+06	6.22265e+06
High	IsMasterProtein	O00154	Cytosolic acyl coenzyme A thioester hydrolase OS=Homo sapiens OX=9606 GN=ACOT7 PE=1 SV=3	0	FALSE	8.343	7	2	5	2	380	41.8	8.54	13.92	2	0	6.36847e+06	5.15642e+06	6.10962e+06
High	IsMasterProtein	P52732	Kinesin-like protein KIF11 OS=Homo sapiens OX=9606 GN=KIF11 PE=1 SV=2	0	FALSE	8.329	2	2	3	2	1056	119.1	5.64	7.86	2	0	4.77801e+06	4.80497e+06	2.26746e+06
High	IsMasterProtein	P46776	60S ribosomal protein L27a OS=Homo sapiens OX=9606 GN=RPL27A PE=1 SV=2	0	FALSE	8.3	14	2	6	2	148	16.6	11	16.41	2	0	5.8488e+07	5.41472e+07	49747808
High	IsMasterProtein	P11586	C-1-tetrahydrofolate synthase, cytoplasmic OS=Homo sapiens OX=9606 GN=MTHFD1 PE=1 SV=3	0	FALSE	8.248	4	2	2	2	935	101.5	7.3	5.21	2	0	2.17687e+06	2.87946e+06	2.76208e+06
High	IsMasterProtein	Q9BXB4	Oxysterol-binding protein-related protein 11 OS=Homo sapiens OX=9606 GN=OSBPL11 PE=1 SV=2	0	FALSE	8.241	3	2	6	2	747	83.6	7.06	14.53	2	0	1.19931e+07	1.22403e+07	8.47038e+06
High	IsMasterProtein	Q16539	Mitogen-activated protein kinase 14 OS=Homo sapiens OX=9606 GN=MAPK14 PE=1 SV=3	0	FALSE	8.217	6	2	2	2	360	41.3	5.78	5.36	2	0	2.92475e+06	3.28578e+06	2.70647e+06
High	IsMasterProtein	P46783	40S ribosomal protein S10 OS=Homo sapiens OX=9606 GN=RPS10 PE=1 SV=1	0	FALSE	8.166	16	3	6	3	165	18.9	10.15	14.65	3	0	8.65035e+06	8.08408e+06	7.32688e+06
High	IsMasterProtein	Q96S66	Chloride channel CLIC-like protein 1 OS=Homo sapiens OX=9606 GN=CLCC1 PE=1 SV=1	0	FALSE	8.143	6	3	10	3	551	62	5.55	22.01	3	0	1.92208e+07	1.72808e+07	1.87378e+07
High	IsMasterProtein	Q9Y5K6	CD2-associated protein OS=Homo sapiens OX=9606 GN=CD2AP PE=1 SV=1	0	FALSE	8.035	2	2	2	2	639	71.4	6.4	5.19	2	0	2.09065e+06	1.52709e+06	1.76969e+06
High	IsMasterProtein	Q00535	Cyclin-dependent-like kinase 5 OS=Homo sapiens OX=9606 GN=CDK5 PE=1 SV=3	0	FALSE	7.978	10	3	5	2	292	33.3	7.66	13.98	3	0	8.38326e+06	8.0369e+06	7854335
High	IsMasterProtein	Q9Y394	Dehydrogenase/reductase SDR family member 7 OS=Homo sapiens OX=9606 GN=DHRS7 PE=1 SV=1	0	FALSE	7.965	9	2	5	2	339	38.3	8.32	8.03	2	0	1.02668e+07	8.82474e+06	8501950
High	IsMasterProtein	O15145	Actin-related protein 2/3 complex subunit 3 OS=Homo sapiens OX=9606 GN=ARPC3 PE=1 SV=3	0	FALSE	7.955	17	3	5	3	178	20.5	8.59	12.04	3	0	1.34776e+07	1.15363e+07	1.10611e+07
High	IsMasterProtein	P26599	Polypyrimidine tract-binding protein 1 OS=Homo sapiens OX=9606 GN=PTBP1 PE=1 SV=1	0	FALSE	7.949	9	3	6	3	531	57.2	9.17	17.49	3	0	1.06662e+07	9.36428e+06	1.06737e+07
High	IsMasterProtein	Q14103	Heterogeneous nuclear ribonucleoprotein D0 OS=Homo sapiens OX=9606 GN=HNRNPD PE=1 SV=1	0	FALSE	7.939	6	2	4	2	355	38.4	7.81	12.97	2	0	6.43877e+06	6.56397e+06	8.76986e+06
High	IsMasterProtein	Q92747	Actin-related protein 2/3 complex subunit 1A OS=Homo sapiens OX=9606 GN=ARPC1A PE=2 SV=2	0	FALSE	7.886	8	2	3	2	370	41.5	8.18	9.33	2	0	7.6257e+06	7.62117e+06	3.74056e+06
High	IsMasterProtein	O75396	Vesicle-trafficking protein SEC22b OS=Homo sapiens OX=9606 GN=SEC22B PE=1 SV=4	0	FALSE	7.884	16	2	4	2	215	24.6	6.92	13.96	2	0	1.20789e+07	9.2465e+06	1.30608e+07
High	IsMasterProtein	Q13596	Sorting nexin-1 OS=Homo sapiens OX=9606 GN=SNX1 PE=1 SV=3	0	FALSE	7.88	7	2	2	2	522	59	5.15	6.17	2	0	3.77949e+06	3.09232e+06	3.35339e+06
High	IsMasterProtein	Q9UMS4	Pre-mRNA-processing factor 19 OS=Homo sapiens OX=9606 GN=PRPF19 PE=1 SV=1	0	FALSE	7.793	5	2	6	2	504	55.1	6.61	16.74	2	0	8.22641e+06	9.59264e+06	7.95143e+06
High	IsMasterProtein	O94905	Erlin-2 OS=Homo sapiens OX=9606 GN=ERLIN2 PE=1 SV=1	0	FALSE	7.792	6	2	4	2	339	37.8	5.62	10.18	2	0	7.93114e+06	7.50033e+06	7.6225e+06
High	IsMasterProtein	P05386	60S acidic ribosomal protein P1 OS=Homo sapiens OX=9606 GN=RPLP1 PE=1 SV=1	0	FALSE	7.756	19	2	6	2	114	11.5	4.32	16.81	2	0	1.33966e+07	1.20261e+07	11671149
High	IsMasterProtein	Q9Y6Y8	SEC23-interacting protein OS=Homo sapiens OX=9606 GN=SEC23IP PE=1 SV=1	0	FALSE	7.746	3	2	4	2	1000	111	5.54	9.8	2	0	3.04817e+06	3.15445e+06	3.11577e+06
High	IsMasterProtein	Q9BQE4	Selenoprotein S OS=Homo sapiens OX=9606 GN=SELENOS PE=1 SV=3	0	FALSE	7.675	11	2	6	2	189	21.2	9.7	18.05	2	0	7.31659e+06	1.08972e+07	1.23317e+07
High	IsMasterProtein	Q96JH7	Deubiquitinating protein VCIP135 OS=Homo sapiens OX=9606 GN=VCPIP1 PE=1 SV=2	0	FALSE	7.653	3	2	3	2	1222	134.2	7.2	2.41	2	0	2.39505e+06	2.25265e+06	2.81909e+06
High	IsMasterProtein	Q92499	ATP-dependent RNA helicase DDX1 OS=Homo sapiens OX=9606 GN=DDX1 PE=1 SV=2	0	FALSE	7.646	5	2	3	2	740	82.4	7.23	6.64	2	0	1.01826e+06	718599	858400
High	IsMasterProtein	O95721	Synaptosomal-associated protein 29 OS=Homo sapiens OX=9606 GN=SNAP29 PE=1 SV=1	0	FALSE	7.643	12	2	4	2	258	29	5.81	11.09	2	0	7.49343e+06	7.33275e+06	6.26117e+06
High	IsMasterProtein	P00367	Glutamate dehydrogenase 1, mitochondrial OS=Homo sapiens OX=9606 GN=GLUD1 PE=1 SV=2	0	FALSE	7.596	6	3	5	3	558	61.4	7.8	12.35	3	0	8.92882e+06	9.75469e+06	7.45481e+06
High	IsMasterProtein	Q93009	Ubiquitin carboxyl-terminal hydrolase 7 OS=Homo sapiens OX=9606 GN=USP7 PE=1 SV=2	0	FALSE	7.59	3	2	3	2	1102	128.2	5.55	7.09	2	0	1.26795e+06	1.88373e+06	415312
High	IsMasterProtein	P53985	Monocarboxylate transporter 1 OS=Homo sapiens OX=9606 GN=SLC16A1 PE=1 SV=3	0	FALSE	7.512	7	2	4	2	500	53.9	8.66	9.39	2	0	4.02601e+06	6.03279e+06	7219917
High	IsMasterProtein	Q9NZC7	WW domain-containing oxidoreductase OS=Homo sapiens OX=9606 GN=WWOX PE=1 SV=1	0	FALSE	7.466	6	2	4	2	414	46.6	7.17	14.7	2	0	7.10377e+06	6.07596e+06	6466561
High	IsMasterProtein	Q8N5K1	CDGSH iron-sulfur domain-containing protein 2 OS=Homo sapiens OX=9606 GN=CISD2 PE=1 SV=1	0	FALSE	7.462	16	2	4	2	135	15.3	9.61	13.38	2	0	9.68578e+06	9.80699e+06	8.59865e+06
High	IsMasterProtein	P49069	Calcium signal-modulating cyclophilin ligand OS=Homo sapiens OX=9606 GN=CAMLG PE=1 SV=1	0	FALSE	7.442	11	2	4	2	296	32.9	8.05	12.65	2	0	6.1897e+06	4.50504e+06	5.39862e+06
High	IsMasterProtein	P61006	Ras-related protein Rab-8A OS=Homo sapiens OX=9606 GN=RAB8A PE=1 SV=1	0	FALSE	7.433	13	2	2	1	207	23.7	9.07	5.46	2	0	1.2005e+06	995443
High	IsMasterProtein	Q9H3N1	Thioredoxin-related transmembrane protein 1 OS=Homo sapiens OX=9606 GN=TMX1 PE=1 SV=1	0	FALSE	7.384	8	2	4	2	280	31.8	4.98	10.81	2	0	1.3004e+07	1.30097e+07	1.20738e+07
High	IsMasterProtein	P00403	Cytochrome c oxidase subunit 2 OS=Homo sapiens OX=9606 GN=MT-CO2 PE=1 SV=1	0	FALSE	7.361	7	2	4	2	227	25.5	4.82	11.03	2	0	2.18007e+07	2.09487e+07	2.24718e+07
High	IsMasterProtein	Q9UM00	Calcium load-activated calcium channel OS=Homo sapiens OX=9606 GN=TMCO1 PE=1 SV=2	0	FALSE	7.336	10	2	4	2	239	27.1	10.26	12.23	2	0	1.67947e+07	1.72004e+07	1.5792e+07
High	IsMasterProtein	Q15029	116 kDa U5 small nuclear ribonucleoprotein component OS=Homo sapiens OX=9606 GN=EFTUD2 PE=1 SV=1	0	FALSE	7.304	2	2	5	1	972	109.4	5	9	2	0	810301	878095	1.06085e+06
High	IsMasterProtein	P26196	Probable ATP-dependent RNA helicase DDX6 OS=Homo sapiens OX=9606 GN=DDX6 PE=1 SV=2	0	FALSE	7.3	5	2	3	2	483	54.4	8.66	8.58	2	0	3.53777e+06	4.09044e+06	3734678
High	IsMasterProtein	P52948	Nuclear pore complex protein Nup98-Nup96 OS=Homo sapiens OX=9606 GN=NUP98 PE=1 SV=4	0	FALSE	7.294	2	2	2	2	1817	197.5	6.4	3.06	2	0	1.4793e+06	1.47852e+06	1.32479e+06
High	IsMasterProtein	P63173	60S ribosomal protein L38 OS=Homo sapiens OX=9606 GN=RPL38 PE=1 SV=2	0	FALSE	7.27	39	3	8	3	70	8.2	10.1	10.68	3	0	8.2506e+07	8.05072e+07	72044004
High	IsMasterProtein	Q12907	Vesicular integral-membrane protein VIP36 OS=Homo sapiens OX=9606 GN=LMAN2 PE=1 SV=1	0	FALSE	7.25	10	2	2	2	356	40.2	6.95	4.15	2	0	7.53006e+06	6.55833e+06	6.41528e+06
High	IsMasterProtein	P47755	F-actin-capping protein subunit alpha-2 OS=Homo sapiens OX=9606 GN=CAPZA2 PE=1 SV=3	0	FALSE	7.236	9	2	3	1	286	32.9	5.85	7.03	2	0	2.45822e+06		1.81121e+06
High	IsMasterProtein	P08133	Annexin A6 OS=Homo sapiens OX=9606 GN=ANXA6 PE=1 SV=3	0	FALSE	7.235	4	3	5	3	673	75.8	5.6	10.95	3	0	1.15473e+07	1.10248e+07	1.00728e+07
High	IsMasterProtein	P26583	High mobility group protein B2 OS=Homo sapiens OX=9606 GN=HMGB2 PE=1 SV=2	0	FALSE	7.189	14	2	4	2	209	24	7.81	16.7	2	0	9.31543e+06	8.47849e+06	9.21335e+06
High	IsMasterProtein	P61160	Actin-related protein 2 OS=Homo sapiens OX=9606 GN=ACTR2 PE=1 SV=1	0	FALSE	7.151	4	2	2	2	394	44.7	6.74	5.18	2	0	7.61611e+06	9.16963e+06	8.99775e+06
High	IsMasterProtein	O00425	Insulin-like growth factor 2 mRNA-binding protein 3 OS=Homo sapiens OX=9606 GN=IGF2BP3 PE=1 SV=2	0	FALSE	7.113	4	2	3	1	579	63.7	8.87	8.57	2	1	1.80511e+07	1.47297e+07	1.42252e+07
High	IsMasterProtein	Q13907	Isopentenyl-diphosphate Delta-isomerase 1 OS=Homo sapiens OX=9606 GN=IDI1 PE=1 SV=2	0	FALSE	7.101	9	2	4	2	227	26.3	6.34	8.66	2	0	5.12048e+06	4.34697e+06	4.35229e+06
High	IsMasterProtein	P06730	Eukaryotic translation initiation factor 4E OS=Homo sapiens OX=9606 GN=EIF4E PE=1 SV=2	0	FALSE	7.083	8	2	6	2	217	25.1	6.15	8.28	2	0	3.66963e+06	4.13189e+06	3.65441e+06
High	IsMasterProtein	P14866	Heterogeneous nuclear ribonucleoprotein L OS=Homo sapiens OX=9606 GN=HNRNPL PE=1 SV=2	0	FALSE	7.056	4	2	2	2	589	64.1	8.22	4.11	2	0	7.79309e+06	7.16596e+06	7141772
High	IsMasterProtein	P30520	Adenylosuccinate synthetase isozyme 2 OS=Homo sapiens OX=9606 GN=ADSS2 PE=1 SV=3	0	FALSE	6.983	5	2	2	2	456	50.1	6.55	4.96	2	0	3.14336e+06	3.15653e+06	2.9611e+06
High	IsMasterProtein	O75494	Serine/arginine-rich splicing factor 10 OS=Homo sapiens OX=9606 GN=SRSF10 PE=1 SV=1	0	FALSE	6.964	9	2	5	2	262	31.3	11.27	19.24	2	0	1.54058e+07	1.4809e+07	1.15958e+07
High	IsMasterProtein	P47897	Glutamine--tRNA ligase OS=Homo sapiens OX=9606 GN=QARS PE=1 SV=1	0	FALSE	6.924	3	2	4	2	775	87.7	7.15	13.83	2	0	7.53754e+06	6.80658e+06	5.38022e+06
High	IsMasterProtein	Q8IZX4	Transcription initiation factor TFIID subunit 1-like OS=Homo sapiens OX=9606 GN=TAF1L PE=1 SV=1	0	FALSE	6.869	2	2	2	2	1826	207.2	5.4	2.4	2	0	849560	790021	1.15726e+06
High	IsMasterProtein	P51572	B-cell receptor-associated protein 31 OS=Homo sapiens OX=9606 GN=BCAP31 PE=1 SV=3	0	FALSE	6.85	7	2	7	2	246	28	8.44	20.93	2	0	3.34268e+07	2.63278e+07	24418674
High	IsMasterProtein	Q96BX8	MOB kinase activator 3A OS=Homo sapiens OX=9606 GN=MOB3A PE=1 SV=1	0	FALSE	6.818	17	2	4	2	217	25.4	8.63	13.6	2	0	5.24242e+06	6.1769e+06	5.09005e+06
High	IsMasterProtein	P11802	Cyclin-dependent kinase 4 OS=Homo sapiens OX=9606 GN=CDK4 PE=1 SV=2	0	FALSE	6.812	7	2	3	1	303	33.7	7.01	10.39	2	0	4.2459e+06	4.15291e+06	3.94139e+06
High	IsMasterProtein	O15260	Surfeit locus protein 4 OS=Homo sapiens OX=9606 GN=SURF4 PE=1 SV=3	0	FALSE	6.734	8	2	3	2	269	30.4	7.78	7.3	2	0	5.56018e+06	6.76086e+06	6.23329e+06
High	IsMasterProtein	Q15019	Septin-2 OS=Homo sapiens OX=9606 GN=SEPTIN2 PE=1 SV=1	0	FALSE	6.727	9	3	5	3	361	41.5	6.6	6	3	0	1.15496e+07	8.94217e+06	9.25202e+06
High	IsMasterProtein	Q92900	Regulator of nonsense transcripts 1 OS=Homo sapiens OX=9606 GN=UPF1 PE=1 SV=2	0	FALSE	6.676	2	2	5	2	1129	124.3	6.61	12.57	2	0	6.02933e+06	5.14641e+06	5175373
High	IsMasterProtein	P19367	Hexokinase-1 OS=Homo sapiens OX=9606 GN=HK1 PE=1 SV=3	0	FALSE	6.655	3	2	5	2	917	102.4	6.8	11.73	2	0	4.47587e+06	3.63748e+06	4.13955e+06
High	IsMasterProtein	O14818	Proteasome subunit alpha type-7 OS=Homo sapiens OX=9606 GN=PSMA7 PE=1 SV=1	0	FALSE	6.639	9	2	2	2	248	27.9	8.46	3.26	2	0	8.98359e+06	8.38222e+06	7.84212e+06
High	IsMasterProtein	Q13428	Treacle protein OS=Homo sapiens OX=9606 GN=TCOF1 PE=1 SV=3	0	FALSE	6.598	2	2	3	2	1488	152	9.04	4.44	2	0	5.77824e+06	6.34843e+06	5.24186e+06
High	IsMasterProtein	P20674	Cytochrome c oxidase subunit 5A, mitochondrial OS=Homo sapiens OX=9606 GN=COX5A PE=1 SV=2	0	FALSE	6.578	18	2	2	2	150	16.8	6.79	6.92	2	0	1.02005e+07	5.91039e+06	5.2591e+06
High	IsMasterProtein	Q9Y230	RuvB-like 2 OS=Homo sapiens OX=9606 GN=RUVBL2 PE=1 SV=3	0	FALSE	6.543	5	2	4	2	463	51.1	5.64	12.26	2	0	4.86301e+06	4.04034e+06	4.04508e+06
High	IsMasterProtein	P40763	Signal transducer and activator of transcription 3 OS=Homo sapiens OX=9606 GN=STAT3 PE=1 SV=2	0	FALSE	6.504	4	2	4	2	770	88	6.3	6.88	2	0	6.65374e+06	6.41295e+06	5315030
High	IsMasterProtein	P61011	Signal recognition particle 54 kDa protein OS=Homo sapiens OX=9606 GN=SRP54 PE=1 SV=1	0	FALSE	6.5	6	3	5	3	504	55.7	8.75	13.48	3	0	1.2029e+07	1.43507e+07	11094720
High	IsMasterProtein	Q9NRG9	Aladin OS=Homo sapiens OX=9606 GN=AAAS PE=1 SV=1	0	FALSE	6.492	5	2	2	2	546	59.5	7.5	5.36	2	0	5.1648e+06	1.48802e+06
High	IsMasterProtein	P23246	Splicing factor, proline- and glutamine-rich OS=Homo sapiens OX=9606 GN=SFPQ PE=1 SV=2	0	FALSE	6.401	3	2	6	1	707	76.1	9.44	13.71	2	0	1.37166e+06		1.63058e+06
High	IsMasterProtein	Q9H5V9	UPF0428 protein CXorf56 OS=Homo sapiens OX=9606 GN=CXorf56 PE=1 SV=1	0	FALSE	6.318	15	2	5	2	222	25.6	8.73	9.96	2	0	2.1878e+07	2.13424e+07	1.89131e+07
High	IsMasterProtein	O95817	BAG family molecular chaperone regulator 3 OS=Homo sapiens OX=9606 GN=BAG3 PE=1 SV=3	0	FALSE	6.258	4	2	4	2	575	61.6	6.95	13.06	2	0	1.36868e+07	1.16218e+07	1.03714e+07
High	IsMasterProtein	Q96C19	EF-hand domain-containing protein D2 OS=Homo sapiens OX=9606 GN=EFHD2 PE=1 SV=1	0	FALSE	6.239	10	2	2	2	240	26.7	5.2	4.99	2	0	9.57937e+06	1.39525e+07	14480026
High	IsMasterProtein	Q99733	Nucleosome assembly protein 1-like 4 OS=Homo sapiens OX=9606 GN=NAP1L4 PE=1 SV=1	0	FALSE	6.211	7	2	5	1	375	42.8	4.69	7.72	2	0		402661	435968
High	IsMasterProtein	P27816	Microtubule-associated protein 4 OS=Homo sapiens OX=9606 GN=MAP4 PE=1 SV=3	0	FALSE	6.062	3	2	3	2	1152	120.9	5.43	7.73	2	0	2.94622e+06	2.95953e+06	5.9446e+06
High	IsMasterProtein	P16435	NADPH--cytochrome P450 reductase OS=Homo sapiens OX=9606 GN=POR PE=1 SV=2	0	FALSE	6.039	3	2	6	2	677	76.6	5.58	17.19	2	0	8.6213e+06	7.80663e+06	7.64071e+06
High	IsMasterProtein	P62318	Small nuclear ribonucleoprotein Sm D3 OS=Homo sapiens OX=9606 GN=SNRPD3 PE=1 SV=1	0	FALSE	5.958	15	2	4	2	126	13.9	10.32	11.78	2	0	7.49863e+06	6.61861e+06	6.31938e+06
High	IsMasterProtein	P55735	Protein SEC13 homolog OS=Homo sapiens OX=9606 GN=SEC13 PE=1 SV=3	0	FALSE	5.946	8	2	4	2	322	35.5	5.48	13.19	2	0	6.29804e+06	5.72279e+06	6673526
High	IsMasterProtein	Q9NWB6	Arginine and glutamate-rich protein 1 OS=Homo sapiens OX=9606 GN=ARGLU1 PE=1 SV=1	0	FALSE	5.938	8	3	14	3	273	33.2	10.35	29.07	3	0	1.37598e+08	1.17735e+08	127033088
High	IsMasterProtein	P60763	Ras-related C3 botulinum toxin substrate 3 OS=Homo sapiens OX=9606 GN=RAC3 PE=1 SV=1	0	FALSE	5.873	9	2	6	2	192	21.4	8.15	13.83	2	0	1.73775e+07	1.63366e+07	15754177
High	IsMasterProtein	Q9HCU5	Prolactin regulatory element-binding protein OS=Homo sapiens OX=9606 GN=PREB PE=1 SV=2	0	FALSE	5.812	5	2	5	2	417	45.4	7.88	11.28	2	0	8.54323e+06	9.64494e+06	9.25684e+06
High	IsMasterProtein	Q9Y4G6	Talin-2 OS=Homo sapiens OX=9606 GN=TLN2 PE=1 SV=4	0	FALSE	5.782	1	3	5	1	2542	271.4	5.57	8.23	3	0	6.26315e+06	5.97909e+06	5.7833e+06
High	IsMasterProtein	P30566	Adenylosuccinate lyase OS=Homo sapiens OX=9606 GN=ADSL PE=1 SV=2	0	FALSE	5.76	4	2	3	2	484	54.9	7.11	3.87	2	0	8.22269e+06	8.02025e+06	9.29701e+06
High	IsMasterProtein	Q9BVK6	Transmembrane emp24 domain-containing protein 9 OS=Homo sapiens OX=9606 GN=TMED9 PE=1 SV=2	0	FALSE	5.739	8	2	5	2	235	27.3	8.02	12.84	2	0	1.20784e+07	1.21182e+07	10805886
High	IsMasterProtein	Q9UL25	Ras-related protein Rab-21 OS=Homo sapiens OX=9606 GN=RAB21 PE=1 SV=3	0	FALSE	5.666	10	2	4	2	225	24.3	7.94	8.18	2	0	4.01175e+06	3.81602e+06	3.55584e+06
High	IsMasterProtein	P14324	Farnesyl pyrophosphate synthase OS=Homo sapiens OX=9606 GN=FDPS PE=1 SV=4	0	FALSE	5.654	5	2	4	2	419	48.2	6.15	8.84	2	0	1.1319e+07	1.09923e+07	9700629
High	IsMasterProtein	Q3ZCQ8	Mitochondrial import inner membrane translocase subunit TIM50 OS=Homo sapiens OX=9606 GN=TIMM50 PE=1 SV=2	0	FALSE	5.591	6	2	2	2	353	39.6	8.37	4.64	2	0	3.47501e+06	1.36755e+06	1.11787e+06
High	IsMasterProtein	Q9ULE6	Paladin OS=Homo sapiens OX=9606 GN=PALD1 PE=1 SV=3	0	FALSE	5.536	2	2	6	2	856	96.7	6.54	10.99	2	0	5.24551e+06	5.41432e+06	4.57207e+06
High	IsMasterProtein	P42126	Enoyl-CoA delta isomerase 1, mitochondrial OS=Homo sapiens OX=9606 GN=ECI1 PE=1 SV=1	0	FALSE	5.507	8	2	2	2	302	32.8	8.54	5.15	2	0	8.52156e+06	7.15428e+06	8.02468e+06
High	IsMasterProtein	Q9UQ35	Serine/arginine repetitive matrix protein 2 OS=Homo sapiens OX=9606 GN=SRRM2 PE=1 SV=2	0	FALSE	5.422	2	2	4	2	2752	299.4	12.06	14.73	2	0	1.20934e+07	1.12332e+07	11574761
High	IsMasterProtein	Q14258	E3 ubiquitin/ISG15 ligase TRIM25 OS=Homo sapiens OX=9606 GN=TRIM25 PE=1 SV=2	0	FALSE	5.421	4	2	2	2	630	70.9	8.09	4.49	2	0	2.66721e+06	2.66145e+06	2.34181e+06
High	IsMasterProtein	P62269	40S ribosomal protein S18 OS=Homo sapiens OX=9606 GN=RPS18 PE=1 SV=3	0	FALSE	5.36	12	2	5	2	152	17.7	10.99	12.39	2	0	7.60717e+06	6.71612e+06	6.01862e+06
High	IsMasterProtein	Q8WUY1	Protein THEM6 OS=Homo sapiens OX=9606 GN=THEM6 PE=1 SV=2	0	FALSE	5.158	8	2	4	2	208	23.9	9.55	5.4	2	0	8.68641e+06	7.55818e+06	7.79028e+06
High	IsMasterProtein	Q9BUK6	Protein misato homolog 1 OS=Homo sapiens OX=9606 GN=MSTO1 PE=1 SV=1	0	FALSE	4.929	3	2	6	2	570	61.8	6.11	8.31	2	0	8.83923e+06	7.38052e+06	5.58656e+06
High	IsMasterProtein	P14314	Glucosidase 2 subunit beta OS=Homo sapiens OX=9606 GN=PRKCSH PE=1 SV=2	0	FALSE	4.921	4	2	4	2	528	59.4	4.41	10.95	2	0	7.97956e+06	8.49856e+06	8.53315e+06
High	IsMasterProtein	P55010	Eukaryotic translation initiation factor 5 OS=Homo sapiens OX=9606 GN=EIF5 PE=1 SV=2	0	FALSE	4.846	4	2	6	2	431	49.2	5.58	12.84	2	0	8.61133e+06	9.02352e+06	6999659
High	IsMasterProtein	O43776	Asparagine--tRNA ligase, cytoplasmic OS=Homo sapiens OX=9606 GN=NARS1 PE=1 SV=1	0	FALSE	4.705	3	2	5	2	548	62.9	6.25	9.77	2	0	1.13291e+07	1.06014e+07	9.9028e+06
High	IsMasterProtein	Q9NZ43	Vesicle transport protein USE1 OS=Homo sapiens OX=9606 GN=USE1 PE=1 SV=2	0	FALSE	4.697	9	2	3	2	259	29.4	9.07	10.29	2	0	2.35447e+07	2.1801e+07	21979332
High	IsMasterProtein	Q9Y6E2	Basic leucine zipper and W2 domain-containing protein 2 OS=Homo sapiens OX=9606 GN=BZW2 PE=1 SV=1	0	FALSE	4.662	4	2	6	1	419	48.1	6.68	8.47	2	0	2.06745e+06	1.52354e+06
High	IsMasterProtein	Q99598	Translin-associated protein X OS=Homo sapiens OX=9606 GN=TSNAX PE=1 SV=1	0	FALSE	4.65	10	2	4	2	290	33.1	6.55	10.12	2	0	5.01744e+06	4.75913e+06	4.16814e+06
High	IsMasterProtein	P61353	60S ribosomal protein L27 OS=Homo sapiens OX=9606 GN=RPL27 PE=1 SV=2	0	FALSE	4.616	13	2	6	2	136	15.8	10.56	14.5	2	0	2.55368e+07	2.78613e+07	24568269
High	IsMasterProtein	Q8TCG1	Protein CIP2A OS=Homo sapiens OX=9606 GN=CIP2A PE=1 SV=2	0	FALSE	4.61	4	3	4	3	905	102.1	6.23	6.45	3	0	1.00928e+07	8.87247e+06	9.43091e+06
High	IsMasterProtein	O00231	26S proteasome non-ATPase regulatory subunit 11 OS=Homo sapiens OX=9606 GN=PSMD11 PE=1 SV=3	0	FALSE	4.589	6	2	2	2	422	47.4	6.48	4.8	2	0	7.27017e+06	6.5324e+06	6.25035e+06
High	IsMasterProtein	P00491	Purine nucleoside phosphorylase OS=Homo sapiens OX=9606 GN=PNP PE=1 SV=2	0	FALSE	4.576	5	2	3	2	289	32.1	6.95	6.17	2	0	4.47755e+06	4.87663e+06	5.00309e+06
High	IsMasterProtein	P62861	40S ribosomal protein S30 OS=Homo sapiens OX=9606 GN=FAU PE=1 SV=1	0	FALSE	4.495	19	2	4	2	59	6.6	12.15	9.13	2	0	1.9124e+07	1.97613e+07	1.79485e+07
High	IsMasterProtein	Q13586	Stromal interaction molecule 1 OS=Homo sapiens OX=9606 GN=STIM1 PE=1 SV=3	0	FALSE	4.444	3	2	4	2	685	77.4	6.67	10.1	2	0	6.25349e+06	4.51615e+06	5.37171e+06
High	IsMasterProtein	Q8TCT9	Minor histocompatibility antigen H13 OS=Homo sapiens OX=9606 GN=HM13 PE=1 SV=1	0	FALSE	4.32	5	2	5	2	377	41.5	6.43	5.52	2	0	9.85605e+06	1.00811e+07	10424938
High	IsMasterProtein	Q5JXB2	Putative ubiquitin-conjugating enzyme E2 N-like OS=Homo sapiens OX=9606 GN=UBE2NL PE=1 SV=1	0	FALSE	4.304	12	2	5	2	153	17.4	5.92	1.8	2	0	6.8604e+06	7.1155e+06	5.98621e+06
High	IsMasterProtein	P45974	Ubiquitin carboxyl-terminal hydrolase 5 OS=Homo sapiens OX=9606 GN=USP5 PE=1 SV=2	0	FALSE	4.223	2	2	3	2	858	95.7	5.03	1.92	2	0	1.12837e+08	1.20966e+08	3.48114e+06
High	IsMasterProtein	Q5VWZ2	Lysophospholipase-like protein 1 OS=Homo sapiens OX=9606 GN=LYPLAL1 PE=1 SV=3	0	FALSE	4.165	6	2	4	2	237	26.3	7.84	3.94	2	0	9.46021e+06	8.62169e+06	8298595
High	IsMasterProtein	Q969Q0	60S ribosomal protein L36a-like OS=Homo sapiens OX=9606 GN=RPL36AL PE=1 SV=3	0	FALSE	4.12	17	2	6	2	106	12.5	10.65	6.78	2	0	1.01487e+07	7.86481e+06	8.11049e+06
High	IsMasterProtein	P40616	ADP-ribosylation factor-like protein 1 OS=Homo sapiens OX=9606 GN=ARL1 PE=1 SV=1	0	FALSE	4.117	14	2	4	2	181	20.4	5.72	10.66	2	0	9.06381e+06	9.50806e+06	9.227e+06
High	IsMasterProtein	P23284	Peptidyl-prolyl cis-trans isomerase B OS=Homo sapiens OX=9606 GN=PPIB PE=1 SV=2	0	FALSE	3.903	6	2	6	2	216	23.7	9.41	10.94	2	0	1.11206e+07	1.28942e+07	10819408
High	IsMasterProtein	P51809	Vesicle-associated membrane protein 7 OS=Homo sapiens OX=9606 GN=VAMP7 PE=1 SV=3	0	FALSE	3.755	8	2	2	2	220	24.9	8.6	4	2	0	4.87995e+06	5.27727e+06	4.47678e+06
High	IsMasterProtein	P28070	Proteasome subunit beta type-4 OS=Homo sapiens OX=9606 GN=PSMB4 PE=1 SV=4	0	FALSE	3.63	6	2	3	2	264	29.2	5.97	4.68	2	0	9.91921e+06	9.91812e+06	9889325
High	IsMasterProtein	Q08J23	RNA cytosine C(5)-methyltransferase NSUN2 OS=Homo sapiens OX=9606 GN=NSUN2 PE=1 SV=2	0	FALSE	3.546	3	2	2	2	767	86.4	6.77	1.89	2	0	6.42048e+06	5.32696e+06	5266469
High	IsMasterProtein	Q8N0X7	Spartin OS=Homo sapiens OX=9606 GN=SPART PE=1 SV=1	0	FALSE	3.546	5	2	5	2	666	72.8	5.91	10.78	2	0	4.08581e+07	5.27055e+07	45574208
High	IsMasterProtein	P48556	26S proteasome non-ATPase regulatory subunit 8 OS=Homo sapiens OX=9606 GN=PSMD8 PE=1 SV=2	0	FALSE	3.522	5	2	5	2	350	39.6	9.7	9.2	2	0	1.04673e+07	9.42236e+06	9330827
High	IsMasterProtein	P39748	Flap endonuclease 1 OS=Homo sapiens OX=9606 GN=FEN1 PE=1 SV=1	0	FALSE	3.518	4	2	3	2	380	42.6	8.62	7.28	2	0	9.13446e+06	9.59538e+06	9704318
High	IsMasterProtein	P35241	Radixin OS=Homo sapiens OX=9606 GN=RDX PE=1 SV=1	0	FALSE	3.128	3	2	5	2	583	68.5	6.37	5.78	2	0	1.11069e+07	1.17376e+07	1.0441e+07
High	IsMasterProtein	P13489	Ribonuclease inhibitor OS=Homo sapiens OX=9606 GN=RNH1 PE=1 SV=2	0	FALSE	3.084	6	2	2	2	461	49.9	4.82	2.12	2	0	3.00836e+06	3.01634e+06	2.47041e+06
High	IsMasterProtein	Q7Z4H7	HAUS augmin-like complex subunit 6 OS=Homo sapiens OX=9606 GN=HAUS6 PE=1 SV=2	0	FALSE	3.005	2	2	3	2	955	108.6	6.47	4.17	2	0	5.70077e+06	6.28391e+06	4.76204e+06
High	IsMasterProtein	P55265	Double-stranded RNA-specific adenosine deaminase OS=Homo sapiens OX=9606 GN=ADAR PE=1 SV=4	0	FALSE	2.984	2	2	4	2	1226	136	8.65	6.35	2	0	6.83227e+06	4.39314e+06	4.30178e+06
High	IsMasterProtein	Q7L1Q6	Basic leucine zipper and W2 domain-containing protein 1 OS=Homo sapiens OX=9606 GN=BZW1 PE=1 SV=1	0	FALSE	2.981	4	2	4	1	419	48	5.92	5.98	2	1	7.57687e+06	8.23731e+06	7.13745e+06
High	IsMasterProtein	Q15005	Signal peptidase complex subunit 2 OS=Homo sapiens OX=9606 GN=SPCS2 PE=1 SV=3	0	FALSE	2.891	7	2	5	2	226	25	8.47	9.62	2	0	1.34771e+07	1.21044e+07	1.13485e+07
High	IsMasterProtein	Q92890-1	Isoform Long of Ubiquitin recognition factor in ER-associated degradation protein 1 OS=Homo sapiens OX=9606 GN=UFD1	0	FALSE	2.765	6	2	2	2	343	38.7	6.34	4.07	2	0	5.3428e+06	4.90527e+06	5.37684e+06
High	IsMasterProtein	P14678	Small nuclear ribonucleoprotein-associated proteins B and B' OS=Homo sapiens OX=9606 GN=SNRPB PE=1 SV=2	0	FALSE	2.717	7	2	4	2	240	24.6	11.19	7.04	2	0	1.23566e+07	1.19498e+07	9.9428e+06
High	IsMasterProtein	Q5JRA6	Transport and Golgi organization protein 1 homolog OS=Homo sapiens OX=9606 GN=MIA3 PE=1 SV=1	0	FALSE	2.714	2	2	3	2	1907	213.6	4.84	2.26	2	0	4.56405e+06	3.50447e+06	3.40294e+06

## Sheet: s5_RTP1S-AirID_Olfr544
Protein FDR Confidence Combined	Master	Accession	Description	Exp q-value Combined	Contaminant	Sum PEP Score	Coverage in Percent	Number of Peptides	Number of PSMs	Number of Unique Peptides	Number of AAs	MW in kDa	calc pI	Score Sequest HT	Number of Peptides by Sequest HT	Number of Razor Peptides	Abundances Normalized Meas. 1	Abundances Normalized Meas. 2	Abundances Normalized Meas. 3
High	IsMasterProtein	P49327	Fatty acid synthase OS=Homo sapiens OX=9606 GN=FASN PE=1 SV=3	0	FALSE	662.129	50	89	346	89	2511	273.3	6.44	1205.38	89	0	2.23117e+09	2.19804e+09	2.03475e+09
High	IsMasterProtein	Q00610	Clathrin heavy chain 1 OS=Homo sapiens OX=9606 GN=CLTC PE=1 SV=5	0	FALSE	248.855	30	40	112	40	1675	191.5	5.69	366.57	40	0	2.91812e+08	285514904	2.95582e+08
High	IsMasterProtein	P0DMV9	Heat shock 70 kDa protein 1B OS=Homo sapiens OX=9606 GN=HSPA1B PE=1 SV=1	0	FALSE	218.158	57	26	145	20	641	70	5.66	487.73	26	6	1.2839e+09	1.26042e+09	1.32932e+09
High	IsMasterProtein	P50990	T-complex protein 1 subunit theta OS=Homo sapiens OX=9606 GN=CCT8 PE=1 SV=4	0	FALSE	213.604	58	31	160	31	548	59.6	5.6	476.82	31	0	1.71754e+09	1.67674e+09	1.70194e+09
High	IsMasterProtein	P11498	Pyruvate carboxylase, mitochondrial OS=Homo sapiens OX=9606 GN=PC PE=1 SV=2	0	FALSE	211.601	41	35	125	35	1178	129.6	6.84	410.5	35	0	6.37258e+08	6.02514e+08	6.05316e+08
High	IsMasterProtein	P07437	Tubulin beta chain OS=Homo sapiens OX=9606 GN=TUBB PE=1 SV=2	0	FALSE	202.015	64	21	170	6	444	49.6	4.89	565.47	21	20	8.29215e+08	8.709e+08	8.83238e+08
High	IsMasterProtein	P68363	Tubulin alpha-1B chain OS=Homo sapiens OX=9606 GN=TUBA1B PE=1 SV=1	0	FALSE	194.751	61	21	154	3	451	50.1	5.06	539.03	21	19	1.49757e+09	1.52973e+09	1.52252e+09
High	IsMasterProtein	O75533	Splicing factor 3B subunit 1 OS=Homo sapiens OX=9606 GN=SF3B1 PE=1 SV=3	0	FALSE	188.941	27	28	84	28	1304	145.7	7.09	297.63	28	0	2.11505e+08	2.1605e+08	2.10308e+08
High	IsMasterProtein	Q71U36	Tubulin alpha-1A chain OS=Homo sapiens OX=9606 GN=TUBA1A PE=1 SV=1	0	FALSE	188.615	61	21	131	3	451	50.1	5.06	467.78	21	0	2.22533e+07	2.98788e+07	2.98464e+07
High	IsMasterProtein	P13639	Elongation factor 2 OS=Homo sapiens OX=9606 GN=EEF2 PE=1 SV=4	0	FALSE	185.145	41	31	117	30	858	95.3	6.83	340.86	31	1	6.42093e+08	6.26588e+08	6.46661e+08
High	IsMasterProtein	Q04637	Eukaryotic translation initiation factor 4 gamma 1 OS=Homo sapiens OX=9606 GN=EIF4G1 PE=1 SV=4	0	FALSE	183.556	25	31	98	30	1599	175.4	5.33	290.77	31	1	4.51212e+08	4.23305e+08	4.27864e+08
High	IsMasterProtein	P42167	Lamina-associated polypeptide 2, isoforms beta/gamma OS=Homo sapiens OX=9606 GN=TMPO PE=1 SV=2	0	FALSE	181.267	56	19	113	19	454	50.6	9.38	401.23	19	0	1.23361e+09	1.36441e+09	1.16985e+09
High	IsMasterProtein	P78527	DNA-dependent protein kinase catalytic subunit OS=Homo sapiens OX=9606 GN=PRKDC PE=1 SV=3	0	FALSE	176.261	12	39	92	39	4128	468.8	7.12	253.51	39	0	1.72679e+08	1.63385e+08	1.79768e+08
High	IsMasterProtein	P07900	Heat shock protein HSP 90-alpha OS=Homo sapiens OX=9606 GN=HSP90AA1 PE=1 SV=5	0	FALSE	174.868	42	27	135	19	732	84.6	5.02	385.94	27	0	7.83644e+08	7.2784e+08	7.52017e+08
High	IsMasterProtein	P08238	Heat shock protein HSP 90-beta OS=Homo sapiens OX=9606 GN=HSP90AB1 PE=1 SV=4	0	FALSE	171.863	41	28	151	19	724	83.2	5.03	431.8	28	11	1.54949e+09	1.45934e+09	1.55871e+09
High	IsMasterProtein	P07814	Bifunctional glutamate/proline--tRNA ligase OS=Homo sapiens OX=9606 GN=EPRS PE=1 SV=5	0	FALSE	160.333	25	26	74	26	1512	170.5	7.33	253.9	26	0	1.71733e+08	1.70095e+08	1.63774e+08
High	IsMasterProtein	P09874	Poly [ADP-ribose] polymerase 1 OS=Homo sapiens OX=9606 GN=PARP1 PE=1 SV=4	0	FALSE	154.343	29	21	68	21	1014	113	8.88	214.26	21	0	3.09358e+08	3.12682e+08	3.22426e+08
High	IsMasterProtein	P30101	Protein disulfide-isomerase A3 OS=Homo sapiens OX=9606 GN=PDIA3 PE=1 SV=4	0	FALSE	152.04	54	21	72	21	505	56.7	6.35	250.2	21	0	4.81106e+08	4.73551e+08	4.82987e+08
High	IsMasterProtein	Q14697	Neutral alpha-glucosidase AB OS=Homo sapiens OX=9606 GN=GANAB PE=1 SV=3	0	FALSE	151.965	34	24	97	24	944	106.8	6.14	299.89	24	0	4.32018e+08	4.14809e+08	4.34912e+08
High	IsMasterProtein	P68371	Tubulin beta-4B chain OS=Homo sapiens OX=9606 GN=TUBB4B PE=1 SV=1	0	FALSE	150.576	53	18	127	1	445	49.8	4.89	406.66	18	2	3.57697e+07	38144353	3.43093e+07
High	IsMasterProtein	P11021	Endoplasmic reticulum chaperone BiP OS=Homo sapiens OX=9606 GN=HSPA5 PE=1 SV=2	0	FALSE	143.379	43	23	74	21	654	72.3	5.16	250.46	23	1	2.94927e+08	866670818	2.95675e+08
High	IsMasterProtein	P04843	Dolichyl-diphosphooligosaccharide--protein glycosyltransferase subunit 1 OS=Homo sapiens OX=9606 GN=RPN1 PE=1 SV=1	0	FALSE	137.463	45	19	73	19	607	68.5	6.38	267.17	19	0	3.37112e+08	3.51828e+08	3.39884e+08
High	IsMasterProtein	P61978	Heterogeneous nuclear ribonucleoprotein K OS=Homo sapiens OX=9606 GN=HNRNPK PE=1 SV=1	0	FALSE	136.245	48	18	100	18	463	50.9	5.54	330.2	18	0	6.74552e+08	632735220	7.09047e+08
High	IsMasterProtein	P05165	Propionyl-CoA carboxylase alpha chain, mitochondrial OS=Homo sapiens OX=9606 GN=PCCA PE=1 SV=4	0	FALSE	132.214	39	23	71	23	728	80	7.52	227.19	23	0	4.18275e+08	3.94247e+08	4.04697e+08
High	IsMasterProtein	Q92616	eIF-2-alpha kinase activator GCN1 OS=Homo sapiens OX=9606 GN=GCN1 PE=1 SV=6	0	FALSE	131.573	14	25	70	25	2671	292.6	7.47	186.68	25	0	9.22698e+07	8.74286e+07	9.63173e+07
High	IsMasterProtein	Q08211	ATP-dependent RNA helicase A OS=Homo sapiens OX=9606 GN=DHX9 PE=1 SV=4	0	FALSE	130.164	27	28	66	28	1270	140.9	6.84	184.5	28	0	2.0218e+08	2.17052e+08	2.26767e+08
High	IsMasterProtein	P14618	Pyruvate kinase PKM OS=Homo sapiens OX=9606 GN=PKM PE=1 SV=4	0	FALSE	129.619	49	18	59	18	531	57.9	7.84	216.62	18	0	2.5396e+08	2.48434e+08	2.52112e+08
High	IsMasterProtein	P68104	Elongation factor 1-alpha 1 OS=Homo sapiens OX=9606 GN=EEF1A1 PE=1 SV=1	0	FALSE	129.482	39	13	85	13	462	50.1	9.01	311.93	13	0	1.07987e+09	1.04796e+09	1.05802e+09
High	IsMasterProtein	P63244	Receptor of activated protein C kinase 1 OS=Homo sapiens OX=9606 GN=RACK1 PE=1 SV=3	0	FALSE	119.897	68	16	60	16	317	35.1	7.69	202.81	16	0	5.29323e+08	5.01154e+08	5.29709e+08
High	IsMasterProtein	Q96A33	Coiled-coil domain-containing protein 47 OS=Homo sapiens OX=9606 GN=CCDC47 PE=1 SV=1	0	FALSE	119.437	32	17	101	17	483	55.8	4.87	309.97	17	0	1.00866e+09	967336681	9.63876e+08
High	IsMasterProtein	P04350	Tubulin beta-4A chain OS=Homo sapiens OX=9606 GN=TUBB4A PE=1 SV=2	0	FALSE	118.174	45	14	114	1	444	49.6	4.88	358.07	14	0	3.08591e+06	3.76782e+06	4.05857e+06
High	IsMasterProtein	P07195	L-lactate dehydrogenase B chain OS=Homo sapiens OX=9606 GN=LDHB PE=1 SV=2	0	FALSE	118.009	47	15	95	14	334	36.6	6.05	272.76	15	0	8.9749e+08	8.69842e+08	9.02483e+08
High	IsMasterProtein	P14625	Endoplasmin OS=Homo sapiens OX=9606 GN=HSP90B1 PE=1 SV=1	0	FALSE	117.715	33	22	74	21	803	92.4	4.84	209.39	22	0	3.65401e+08	3.42762e+08	3.60469e+08
High	IsMasterProtein	P27824	Calnexin OS=Homo sapiens OX=9606 GN=CANX PE=1 SV=2	0	FALSE	115.917	37	20	84	20	592	67.5	4.6	260.43	20	0	7.26724e+08	7.06379e+08	7.32389e+08
High	IsMasterProtein	P21333	Filamin-A OS=Homo sapiens OX=9606 GN=FLNA PE=1 SV=4	0	FALSE	113.042	10	20	57	20	2647	280.6	6.06	170.89	20	0	1.85587e+08	1.79576e+08	1.78876e+08
High	IsMasterProtein	P00338	L-lactate dehydrogenase A chain OS=Homo sapiens OX=9606 GN=LDHA PE=1 SV=2	0	FALSE	111.231	72	21	96	20	332	36.7	8.27	247.51	21	1	1.05485e+09	1.10605e+09	1.10622e+09
High	IsMasterProtein	P22102	Trifunctional purine biosynthetic protein adenosine-3 OS=Homo sapiens OX=9606 GN=GART PE=1 SV=1	0	FALSE	110.92	26	21	65	21	1010	107.7	6.7	203.63	21	0	2.69198e+08	253556605	2.69498e+08
High	IsMasterProtein	P11142	Heat shock cognate 71 kDa protein OS=Homo sapiens OX=9606 GN=HSPA8 PE=1 SV=1	0	FALSE	104.9	32	15	59	11	646	70.9	5.52	191.18	15	1	1.35627e+08	1.31047e+08	1.47482e+08
High	IsMasterProtein	P09651	Heterogeneous nuclear ribonucleoprotein A1 OS=Homo sapiens OX=9606 GN=HNRNPA1 PE=1 SV=5	0	FALSE	102.784	35	11	56	11	372	38.7	9.13	200.66	11	0	2.12643e+08	2.03976e+08	2.04104e+08
High	IsMasterProtein	O00571	ATP-dependent RNA helicase DDX3X OS=Homo sapiens OX=9606 GN=DDX3X PE=1 SV=3	0	FALSE	100.781	31	16	54	16	662	73.2	7.18	185.2	16	0	2.19037e+08	2.33027e+08	2.26796e+08
High	IsMasterProtein	P22234	Multifunctional protein ADE2 OS=Homo sapiens OX=9606 GN=PAICS PE=1 SV=3	0	FALSE	98.324	41	16	56	16	425	47	7.23	167.68	16	0	2.45308e+08	240617136	2.41621e+08
High	IsMasterProtein	Q00839	Heterogeneous nuclear ribonucleoprotein U OS=Homo sapiens OX=9606 GN=HNRNPU PE=1 SV=6	0	FALSE	97.703	23	16	59	15	825	90.5	6	187.81	16	1	3.23398e+08	2.97039e+08	3.09643e+08
High	IsMasterProtein	Q13162	Peroxiredoxin-4 OS=Homo sapiens OX=9606 GN=PRDX4 PE=1 SV=1	0	FALSE	96.785	54	11	42	10	271	30.5	6.29	151.21	11	1	1.95508e+08	1.87527e+08	1.98075e+08
High	IsMasterProtein	O75534	Cold shock domain-containing protein E1 OS=Homo sapiens OX=9606 GN=CSDE1 PE=1 SV=2	0	FALSE	92.442	29	20	61	20	798	88.8	6.25	181.06	20	0	1.9443e+08	188582496	1.94191e+08
High	IsMasterProtein	P06737	Glycogen phosphorylase, liver form OS=Homo sapiens OX=9606 GN=PYGL PE=1 SV=4	0	FALSE	91.065	24	20	53	20	847	97.1	7.17	132.11	20	0	1.43682e+08	1.36039e+08	1.48303e+08
High	IsMasterProtein	Q96RQ3	Methylcrotonoyl-CoA carboxylase subunit alpha, mitochondrial OS=Homo sapiens OX=9606 GN=MCCC1 PE=1 SV=3	0	FALSE	87.745	24	14	53	14	725	80.4	7.78	166.39	14	0	2.53646e+08	2.4955e+08	2.54842e+08
High	IsMasterProtein	P04844	Dolichyl-diphosphooligosaccharide--protein glycosyltransferase subunit 2 OS=Homo sapiens OX=9606 GN=RPN2 PE=1 SV=3	0	FALSE	86.882	31	11	30	11	631	69.2	5.69	114.6	11	0	7.84271e+07	7.91256e+07	7.8622e+07
High	IsMasterProtein	Q15233	Non-POU domain-containing octamer-binding protein OS=Homo sapiens OX=9606 GN=NONO PE=1 SV=4	0	FALSE	86.337	35	14	56	13	471	54.2	8.95	153.01	14	1	4.65272e+08	465342723	4.80499e+08
High	IsMasterProtein	P84103	Serine/arginine-rich splicing factor 3 OS=Homo sapiens OX=9606 GN=SRSF3 PE=1 SV=1	0	FALSE	84.639	45	9	66	8	164	19.3	11.65	204.95	9	1	3.74521e+08	3.91418e+08	3.93364e+08
High	IsMasterProtein	P13010	X-ray repair cross-complementing protein 5 OS=Homo sapiens OX=9606 GN=XRCC5 PE=1 SV=3	0	FALSE	82.768	33	21	58	21	732	82.7	5.81	162.61	21	0	2.31991e+08	2.09038e+08	2.17818e+08
High	IsMasterProtein	P60842	Eukaryotic initiation factor 4A-I OS=Homo sapiens OX=9606 GN=EIF4A1 PE=1 SV=1	0	FALSE	81.025	50	18	66	16	406	46.1	5.48	168.06	18	2	4.99297e+08	5.1104e+08	5.11019e+08
High	IsMasterProtein	P63104	14-3-3 protein zeta/delta OS=Homo sapiens OX=9606 GN=YWHAZ PE=1 SV=1	0	FALSE	79.616	49	11	57	8	245	27.7	4.79	162.26	11	4	5.71841e+08	5.62006e+08	6.08256e+08
High	IsMasterProtein	P59025	Receptor-transporting protein 1 OS=Homo sapiens OX=9606 GN=RTP1 PE=2 SV=2	0	FALSE	79.502	21	5	122	5	263	30.9	7.81	426.56	5	0	4.15995e+09	4.03304e+09	4.33905e+09
High	IsMasterProtein	P46060	Ran GTPase-activating protein 1 OS=Homo sapiens OX=9606 GN=RANGAP1 PE=1 SV=1	0	FALSE	78.827	26	13	31	13	587	63.5	4.68	99.93	13	0	1.27674e+08	1.15632e+08	1.25407e+08
High	IsMasterProtein	P17987	T-complex protein 1 subunit alpha OS=Homo sapiens OX=9606 GN=TCP1 PE=1 SV=1	0	FALSE	78.472	33	15	46	15	556	60.3	6.11	142.59	15	0	1.78239e+08	1.70816e+08	1.89113e+08
High	IsMasterProtein	P80303	Nucleobindin-2 OS=Homo sapiens OX=9606 GN=NUCB2 PE=1 SV=3	0	FALSE	78.426	33	10	37	10	420	50.2	5.12	133.76	10	0	1.47394e+08	1.6191e+08	1.63684e+08
High	IsMasterProtein	P53621	Coatomer subunit alpha OS=Homo sapiens OX=9606 GN=COPA PE=1 SV=2	0	FALSE	78.131	20	19	40	19	1224	138.3	7.66	122.78	19	0	1.12703e+08	1.17986e+08	1.181e+08
High	IsMasterProtein	Q9NYU2	UDP-glucose:glycoprotein glucosyltransferase 1 OS=Homo sapiens OX=9606 GN=UGGT1 PE=1 SV=3	0	FALSE	77.961	15	18	42	18	1555	177.1	5.63	128.84	18	0	8.62368e+07	9.0547e+07	9.40002e+07
High	IsMasterProtein	O60884	DnaJ homolog subfamily A member 2 OS=Homo sapiens OX=9606 GN=DNAJA2 PE=1 SV=1	0	FALSE	77.544	37	11	44	11	412	45.7	6.48	118.93	11	0	1.43195e+08	1.40549e+08	1.50772e+08
High	IsMasterProtein	P13667	Protein disulfide-isomerase A4 OS=Homo sapiens OX=9606 GN=PDIA4 PE=1 SV=2	0	FALSE	77.294	29	17	52	17	645	72.9	5.07	134.25	17	0	2.5942e+08	2.47723e+08	2.58053e+08
High	IsMasterProtein	Q7KZF4	Staphylococcal nuclease domain-containing protein 1 OS=Homo sapiens OX=9606 GN=SND1 PE=1 SV=1	0	FALSE	77.25	22	13	31	13	910	101.9	7.17	89.43	13	0	7.43737e+07	68251086	7.16274e+07
High	IsMasterProtein	P37802	Transgelin-2 OS=Homo sapiens OX=9606 GN=TAGLN2 PE=1 SV=3	0	FALSE	76.993	61	11	47	11	199	22.4	8.25	145.31	11	0	1.27192e+08	1.2113e+08	1.19009e+08
High	IsMasterProtein	P68133	Actin, alpha skeletal muscle OS=Homo sapiens OX=9606 GN=ACTA1 PE=1 SV=1	0	FALSE	76.184	29	11	100	1	377	42	5.39	246.79	11	0	8.37131e+06	9010684	1.05968e+07
High	IsMasterProtein	P62258	14-3-3 protein epsilon OS=Homo sapiens OX=9606 GN=YWHAE PE=1 SV=1	0	FALSE	74.813	53	11	60	9	255	29.2	4.74	172.59	11	0	4.15474e+08	3.89584e+08	3.90184e+08
High	IsMasterProtein	P26641	Elongation factor 1-gamma OS=Homo sapiens OX=9606 GN=EEF1G PE=1 SV=3	0	FALSE	74.589	35	15	44	15	437	50.1	6.67	122.06	15	0	1.78356e+08	1.83286e+08	1.88096e+08
High	IsMasterProtein	P26639	Threonine--tRNA ligase 1, cytoplasmic OS=Homo sapiens OX=9606 GN=TARS1 PE=1 SV=3	0	FALSE	74.254	27	17	41	17	723	83.4	6.67	109.2	17	0	1.03816e+08	1.02409e+08	1.05809e+08
High	IsMasterProtein	P23396	40S ribosomal protein S3 OS=Homo sapiens OX=9606 GN=RPS3 PE=1 SV=2	0	FALSE	71.991	64	17	64	17	243	26.7	9.66	181.9	17	0	4.73461e+08	4.41712e+08	4.78315e+08
High	IsMasterProtein	O14654	Insulin receptor substrate 4 OS=Homo sapiens OX=9606 GN=IRS4 PE=1 SV=1	0	FALSE	70.325	13	12	30	12	1257	133.7	8.44	89.07	12	0	6.33646e+07	6.40746e+07	5.85361e+07
High	IsMasterProtein	P05388	60S acidic ribosomal protein P0 OS=Homo sapiens OX=9606 GN=RPLP0 PE=1 SV=1	0	FALSE	70.314	52	12	39	12	317	34.3	5.97	129.39	12	0	2.21065e+08	2.32412e+08	2.35897e+08
High	IsMasterProtein	P06493	Cyclin-dependent kinase 1 OS=Homo sapiens OX=9606 GN=CDK1 PE=1 SV=3	0	FALSE	68.827	51	12	38	11	297	34.1	8.4	110.56	12	1	1.39792e+08	1.39893e+08	1.47518e+08
High	IsMasterProtein	P62826	GTP-binding nuclear protein Ran OS=Homo sapiens OX=9606 GN=RAN PE=1 SV=3	0	FALSE	67.206	38	10	43	10	216	24.4	7.49	142.83	10	0	5.67985e+08	5.09958e+08	5.55229e+08
High	IsMasterProtein	P08670	Vimentin OS=Homo sapiens OX=9606 GN=VIM PE=1 SV=4	0	FALSE	67.177	29	11	43	11	466	53.6	5.12	122.24	11	0	2.44964e+08	2.57688e+08	2.49964e+08
High	IsMasterProtein	P49368	T-complex protein 1 subunit gamma OS=Homo sapiens OX=9606 GN=CCT3 PE=1 SV=4	0	FALSE	65.709	34	14	39	14	545	60.5	6.49	116.37	14	0	2.61054e+08	253051074	2.53692e+08
High	IsMasterProtein	P51610	Host cell factor 1 OS=Homo sapiens OX=9606 GN=HCFC1 PE=1 SV=2	0	FALSE	65.465	8	13	41	13	2035	208.6	7.46	130.68	13	0	1.72422e+08	152942140	1.82657e+08
High	IsMasterProtein	Q14974	Importin subunit beta-1 OS=Homo sapiens OX=9606 GN=KPNB1 PE=1 SV=2	0	FALSE	64.244	19	12	37	12	876	97.1	4.78	108.33	12	0	7.84665e+07	7.85414e+07	8.04523e+07
High	IsMasterProtein	P61204	ADP-ribosylation factor 3 OS=Homo sapiens OX=9606 GN=ARF3 PE=1 SV=2	0	FALSE	63.9	67	10	41	5	181	20.6	7.43	109.44	10	5	3.55386e+08	3.462e+08	3.47946e+08
High	IsMasterProtein	P25705	ATP synthase subunit alpha, mitochondrial OS=Homo sapiens OX=9606 GN=ATP5F1A PE=1 SV=1	0	FALSE	63.816	27	11	23	11	553	59.7	9.13	73.07	11	0	6.82332e+07	6.96214e+07	6.82178e+07
High	IsMasterProtein	Q14204	Cytoplasmic dynein 1 heavy chain 1 OS=Homo sapiens OX=9606 GN=DYNC1H1 PE=1 SV=5	0	FALSE	63.768	5	16	35	16	4646	532.1	6.4	93.07	16	0	5.13129e+07	4.71095e+07	5.23262e+07
High	IsMasterProtein	Q14498	RNA-binding protein 39 OS=Homo sapiens OX=9606 GN=RBM39 PE=1 SV=2	0	FALSE	63.361	28	12	31	12	530	59.3	10.1	90.5	12	0	1.16108e+08	1.17106e+08	1.18698e+08
High	IsMasterProtein	Q9Y4L1	Hypoxia up-regulated protein 1 OS=Homo sapiens OX=9606 GN=HYOU1 PE=1 SV=1	0	FALSE	61.927	18	11	23	11	999	111.3	5.22	69.48	11	0	6.45134e+07	5.80625e+07	6.21199e+07
[truncated: 582 more rows]

## Sheet: s1_vs_s2
Protein FDR Confidence Combined	Master	Accession	Description	Exp q-value Combined	Contaminant	Sum PEP Score	Coverage in Percent	Number of Peptides	Number of PSMs	Number of Unique Peptides	Number of AAs	MW in kDa	calc pI	Score Sequest HT s1	Score Sequest HT s2	Number of Peptides by Sequest HT s1	Number of Peptides by Sequest HT s2	Number of Razor Peptides	Abundance Ratio s2/s1	Abundance Ratio Adj P-Value s2/s1	Abundances Grouped s1	Abundances Grouped s2	Abundances Grouped CV in Percent s1	Abundances Grouped CV in Percent s2
[truncated: 537 more rows]

[truncated: 5 more sheets: s1_vs_s3, s1_vs_s4, s1_vs_s5, s2_vs_s4, s3_vs_s5]
