# Supplementary material for: Identification and Characterization of Proteins That Are Involved in RTP1S-Dependent Transport of Olfactory Receptors
Source: Int J Mol Sci. 2023 Apr 25;24(9):7829. doi: 10.3390/ijms24097829 (PMC10177996; doi:10.3390/ijms24097829)
Supplement: Supplementary file 1 [file ijms-24-07829-s001.zip › Supplementary Table S1.pdf]

Supplementary Table S1. Settings of Proteome Discoverer 2.4.

Processing Workflow:

| Node              | Parameter                                    | Values                                                                                                                                  |
|-------------------|----------------------------------------------|-----------------------------------------------------------------------------------------------------------------------------------------|
| Spectrum Files RC | Protein Database                             | PD_Contaminants_2015_5<br>(bundled in Proteome Discoverer)<br>All human ORFs<br>(from UniProt: UP UP000005640,<br>downloaded on 191122) |
|                   | Enzyme Name                                  | Trypsin (full)                                                                                                                          |
|                   | Dynamic Modification                         | None                                                                                                                                    |
|                   | Static Peptide N-Terminus                    | None                                                                                                                                    |
|                   | Static Modifications                         | None                                                                                                                                    |
| Spectrum Selector | 1. General Settings                          |                                                                                                                                         |
|                   | Precursor Selection                          | Use MS1 Precursor                                                                                                                       |
|                   | Provide Profile Spectra                      | Automatic                                                                                                                               |
|                   | 2. Spectrum Properties Filter                |                                                                                                                                         |
|                   | Lower RT Limit                               | 0                                                                                                                                       |
|                   | Upper RT Limit                               | 0                                                                                                                                       |
|                   | First Scan                                   | 0                                                                                                                                       |
|                   | Last Scan                                    | 0                                                                                                                                       |
|                   | Lowest Charge State                          | 0                                                                                                                                       |
|                   | Highest Charge State                         | 0                                                                                                                                       |
|                   | Min. Precursor Mass                          | 350 Da                                                                                                                                  |
|                   | Max. Precursor Mass                          | 5000 Da                                                                                                                                 |
|                   | Total Intensity Threshold                    | 0                                                                                                                                       |
|                   | Minimum Peak Count                           | 1                                                                                                                                       |
|                   | 3. Scan Event Filters                        |                                                                                                                                         |
|                   | MS Order                                     | Is Not MS1                                                                                                                              |
|                   | Min. Collision Energy                        | 0                                                                                                                                       |
|                   | Max. Collision Energy                        | 1000                                                                                                                                    |
|                   | Scan Type                                    | Is Full                                                                                                                                 |
|                   | 4. Peak Filters                              |                                                                                                                                         |
|                   | S/N Threshold (FT-only)                      | 1.5                                                                                                                                     |
|                   | 5. Replacements for Unrecognized Properties  |                                                                                                                                         |
|                   | Unrecognized Charge Replacements             | Automatic                                                                                                                               |
|                   | Unrecognized Mass Analyzer Replacements      | ITMS                                                                                                                                    |
|                   | Unrecognized MS Order Replacements           | MS2                                                                                                                                     |
|                   | Unrecognized Activation Type Replacements    | CID                                                                                                                                     |
|                   | Unrecognized Polarity Replacements           | +                                                                                                                                       |
|                   | Unrecognized MS Resolution@200 Replacements  | 60000                                                                                                                                   |
|                   | Unrecognized MSn Resolution@200 Replacements | 30000                                                                                                                                   |
| Sequest HT        | 1. Input Data                                |                                                                                                                                         |
|                   | Protein Database                             | PD_Contaminants_2015_5<br>(bundled in Proteome Discoverer)<br>All human ORFs<br>(from UniProt: UP UP000005640,<br>downloaded on 191122) |
|                   | Enzyme                                       | Trypsin (full)                                                                                                                          |
|                   | Max. Missed Cleavage Sites                   | 2                                                                                                                                       |
|                   | Min. Peptide Length                          | 6                                                                                                                                       |
|                   | Max. Peptide Length                          | 100                                                                                                                                     |

|                         |                                             |                                                             |
|-------------------------|---------------------------------------------|-------------------------------------------------------------|
|                         | 2. Tolerances                               |                                                             |
|                         | Precursor Mass Tolerance                    | 10 ppm                                                      |
|                         | Fragment Mass Tolerance                     | 0.02 Da                                                     |
|                         | Use Average Precursor Mass                  | False                                                       |
|                         | Use Average Fragment Mass                   | False                                                       |
|                         | 3. Spectrum Matching                        |                                                             |
|                         | Use Neutral Loss a Ions                     | True                                                        |
|                         | Use Neutral Loss b Ions                     | True                                                        |
|                         | Use Neutral Loss y Ions                     | True                                                        |
|                         | Use Flanking Ions                           | True                                                        |
|                         | Weight of a Ions                            | 0                                                           |
|                         | Weight of b Ions                            | 1                                                           |
|                         | Weight of c Ions                            | 0                                                           |
|                         | Weight of x Ions                            | 0                                                           |
|                         | Weight of y Ions                            | 1                                                           |
|                         | Weight of z Ions                            | 0                                                           |
|                         | 4. Dynamic Modifications                    |                                                             |
|                         | Max. Equal Modifications Per Peptide        | 3                                                           |
|                         | Dynamic Modification                        | Oxidation / +15.995 Da (M)<br>Deamidated / +0.984 Da (N, Q) |
|                         | 5. Dynamic Modifications (peptide terminus) |                                                             |
|                         | (None)                                      |                                                             |
|                         | 6. Dynamic Modifications (protein terminus) |                                                             |
|                         | 1. N-Terminal Modification                  | Acetyl / +42.011 Da<br>(N-Terminus)                         |
|                         | 7. Static Modifications                     |                                                             |
|                         | 1. Static Modification                      | Carbamidomethyl / +57.021 Da<br>(C)                         |
| Percolator              | 1. Target/Decoy Strategy                    |                                                             |
|                         | Target/Decoy Selection                      | Concatenated                                                |
|                         | Validation based on                         | q-Value                                                     |
|                         | 2. Input Data                               |                                                             |
|                         | Maximum Delta Cn                            | 0.05                                                        |
|                         | Maximum Rank                                | 0                                                           |
|                         | 3. FDR Targets                              |                                                             |
|                         | Target FDR (Strict)                         | 0.01                                                        |
|                         | Target FDR (Relaxed)                        | 0.05                                                        |
| Minora Feature Detector | (No parameters)                             |                                                             |

Consensus Workflow:

| Node      | Parameter                                     | Values                   |
|-----------|-----------------------------------------------|--------------------------|
| MSF Files | 1. Storage Settings                           |                          |
|           | Spectra to Store                              | Identified or Quantified |
|           | Feature Traces to Store                       | All                      |
|           | 2. Merging of Identified Peptide and Proteins |                          |
|           | Merge Mode                                    | Do Not Merge             |
|           | 3. FASTA Title Line Display                   |                          |
|           | Reported FASTA Title Lines                    | Best match               |
|           | 4. PSM Filters                                |                          |
|           | Maximum Delta Mass                            | 0 ppm                    |

|                               |                                                                           |                                                          |
|-------------------------------|---------------------------------------------------------------------------|----------------------------------------------------------|
| PSM Grouper                   | 1. Peptide Group Modifications                                            |                                                          |
|                               | Site Probability Threshold                                                | 75                                                       |
| Peptide Validator             | 1. General Validation Settings                                            |                                                          |
|                               | Validation Mode                                                           | Automatic (Control peptide level error rate if possible) |
|                               | Target FDR (Strict) for PSMs                                              | 0.01                                                     |
|                               | Target FDR (Relaxed) for PSMs                                             | 0.05                                                     |
|                               | Target FDR (Strict) for Peptides                                          | 0.01                                                     |
|                               | Target FDR (Relaxed) for Peptides                                         | 0.05                                                     |
|                               | 2. Specific Validation Settings                                           |                                                          |
|                               | Target/Decoy Selection for PSM Level FDR Calculation Based on Score       | Automatic                                                |
|                               | Reset Confidences for Nodes without Decoy Search (Fixed score thresholds) | False                                                    |
| Peptide and Protein Filter    | 1. Peptide Filters                                                        |                                                          |
|                               | Peptide Confidence At Least                                               | High                                                     |
|                               | Keep Lower Confident PSMs                                                 | True                                                     |
|                               | Minimum Peptide Length                                                    | 6                                                        |
|                               | Remove Peptides Without Protein Reference                                 | False                                                    |
|                               | 2. Protein Filters                                                        |                                                          |
|                               | Minimum Number of Peptide Sequences                                       | 1                                                        |
|                               | Count Only Rank 1 Peptides                                                | False                                                    |
|                               | Count Peptides Only for Top Scored Protein                                | False                                                    |
| Protein Scorer                | (No parameters)                                                           |                                                          |
| Protein Grouping              | 1. Protein Grouping                                                       |                                                          |
|                               | Apply strict parsimony principle                                          | True                                                     |
| Peptide in Protein Annotation | 1. Flanking Residues                                                      |                                                          |
|                               | Annotate Flanking Residues of the Peptide                                 | False                                                    |
|                               | 2. Modifications in Peptide                                               |                                                          |
|                               | Protein Modifications Reported                                            | Only for Master Proteins                                 |
|                               | 3. Modifications in Protein                                               |                                                          |
|                               | Modification Sites Reported                                               | All And Specific                                         |
|                               | Minimum PSM Confidence                                                    | High                                                     |
|                               | Report Only PTMs                                                          | True                                                     |
|                               | 4. Positions in Protein                                                   |                                                          |
|                               | Protein Positions for Peptides                                            | Only for Master Proteins                                 |
| Protein FDR Validator         | 1. Confidence Thresholds                                                  |                                                          |
|                               | Target FDR (Strict)                                                       | 0.01                                                     |
|                               | Target FDR (Relaxed)                                                      | 0.05                                                     |
| Protein Marker                | 1. Contaminant Database                                                   |                                                          |
|                               | Protein Database                                                          | PD Contaminants 2015 5                                   |
|                               | 5. Annotate Species                                                       |                                                          |
|                               | As Species Map                                                            | False                                                    |
|                               | As Species Names                                                          | False                                                    |
|                               | 6. Mark Additional Entities                                               |                                                          |
|                               | Annotation Groups                                                         | False                                                    |
|                               | Pathway Groups                                                            | False                                                    |
|                               | Modification Sites                                                        | True                                                     |
|                               | Peptide Isoform Groups                                                    | True                                                     |
| Feature Mapper                | 1. Chromatographic Alignment                                              |                                                          |
|                               | Perform RT Alignment                                                      | True                                                     |

|                           |                                                 |                             |
|---------------------------|-------------------------------------------------|-----------------------------|
|                           | Maximum RT Shift [min]                          | 10                          |
|                           | 2. Feature Linking and Mapping                  |                             |
|                           | Min. S/N Threshold                              | 5                           |
| Precursor Ions Quantifier | 1. General Quantification Settings              |                             |
|                           | Peptides to Use                                 | Unique + Razor              |
|                           | Consider Protein Groups for Peptide Uniqueness  | True                        |
|                           | Use Shared Quan Results                         | True                        |
|                           | Reject Quan Results with Missing Channels       | False                       |
|                           | 2. Precursor Quantification                     |                             |
|                           | Precursor Abundance Based On                    | Intensity                   |
|                           | Min. # Replicate Features [%]                   | 0                           |
|                           | 3. Normalization and Scaling                    |                             |
|                           | Normalization Mode                              | Total Peptide Amount        |
|                           | Scaling Mode                                    | None                        |
|                           | 4. Exclude Peptides from Protein Quantification |                             |
|                           | For Normalization                               | Exclude Modified            |
|                           | For Protein Roll-Up                             | Use All Peptides            |
|                           | For Pairwise Ratios                             | Exclude Modified            |
|                           | 5. Quan Rollup and Hypothesis Testing           |                             |
|                           | Protein Abundance Calculation                   | Summed Abundances           |
|                           | N for Top N                                     | 3                           |
|                           | Protein Ratio Calculation                       | Protein Abundance Based     |
|                           | Maximum Allowed Fold Change                     | 100                         |
|                           | Imputation Mode                                 | None                        |
|                           | Hypothesis Test                                 | ANOVA (Individual Proteins) |
|                           | 6. Quan Ratio Distributions                     |                             |
|                           | 1st Fold Change Threshold                       | 2                           |
|                           | 2nd Fold Change Threshold                       | 4                           |
|                           | 3rd Fold Change Threshold                       | 6                           |
|                           | 4th Fold Change Threshold                       | 8                           |
|                           | 5th Fold Change Threshold                       | 10                          |
